# Supplementary material for: Investigation of the host transcriptional response to intracellular bacterial infection using Dictyostelium discoideum as a host model
Source: BMC Genomics. 2019 Dec 10;20:961. doi: 10.1186/s12864-019-6269-x (PMC6902447; doi:10.1186/s12864-019-6269-x)
Supplement: Supplementary file 5 — Additional file 5. Enriched GO terms for genes differentially expressed one and six hours post L. pneumophila infection. All enriched GO terms including statistics and associated genes. [file 12864_2019_6269_MOESM5_ESM.xlsx]

## Sheet: Blad1
Reuglation	Category	ID	TERM	Corrected P-value	P-value	Annotated	Background	Fold enrichment	Annotated genes
Up-regulated genes 1 hpi	Biological process	GO:0019471	4-hydroxyproline metabolic process	0.00225679	5.6561e-06	4	7	27.9884	DDB_G0281783, DDB_G0284409, DDB_G0285501, DDB_G0292888
		GO:0018401	peptidyl-proline hydroxylation to 4-hydroxy-L-proline	0.00225679	5.6561e-06	4	7	27.9884	DDB_G0281783, DDB_G0284409, DDB_G0285501, DDB_G0292888
		GO:0018126	protein hydroxylation	0.00225679	5.6561e-06	4	7	27.9884	DDB_G0281783, DDB_G0284409, DDB_G0285501, DDB_G0292888
		GO:0019511	peptidyl-proline hydroxylation	0.00225679	5.6561e-06	4	7	27.9884	DDB_G0281783, DDB_G0284409, DDB_G0285501, DDB_G0292888
		GO:0032436	positive regulation of proteasomal ubiquitin-dependent protein catabolic process	0.0163974	4.10963e-05	5	20	12.2449	DDB_G0270130, DDB_G0283425, DDB_G0285763, DDB_G0291011, DDB_G0292120
		GO:2000060	positive regulation of ubiquitin-dependent protein catabolic process	0.021165	5.30452e-05	5	21	11.6618	DDB_G0270130, DDB_G0283425, DDB_G0285763, DDB_G0291011, DDB_G0292120
		GO:0032434	regulation of proteasomal ubiquitin-dependent protein catabolic process	0.021165	5.30452e-05	5	21	11.6618	DDB_G0270130, DDB_G0283425, DDB_G0285763, DDB_G0291011, DDB_G0292120
		GO:2000058	regulation of ubiquitin-dependent protein catabolic process	0.0269364	6.75097e-05	5	22	11.1318	DDB_G0270130, DDB_G0283425, DDB_G0285763, DDB_G0291011, DDB_G0292120
	cellular component	GO:0030312	external encapsulating structure	0.00158667	1.72464e-05	5	17	14.4058	DDB_G0276869, DDB_G0276941, DDB_G0277141, DDB_G0283149, DDB_G0285637
		GO:0005618	cell wall	0.00158667	1.72464e-05	5	17	14.4058	DDB_G0276869, DDB_G0276941, DDB_G0277141, DDB_G0283149, DDB_G0285637
		GO:0031160	spore wall	0.00459917	4.9991e-05	4	11	17.8108	DDB_G0276869, DDB_G0276941, DDB_G0277141, DDB_G0283149
	Molecular function	GO:0016706	oxidoreductase activity, acting on paired donors, with incorporation or reduction of molecular oxygen, 2-oxoglutarate as one donor, and incorporation of one atom each of oxygen into both donors	0.000108988	7.89767e-07	5	10	24.4899	DDB_G0281783, DDB_G0284409, DDB_G0285501, DDB_G0292888, DDB_G0349042
		GO:0004656	procollagen-proline 4-dioxygenase activity	0.000339976	2.4636e-06	4	6	32.6532	DDB_G0281783, DDB_G0284409, DDB_G0285501, DDB_G0292888
		GO:0019798	procollagen-proline dioxygenase activity	0.000339976	2.4636e-06	4	6	32.6532	DDB_G0281783, DDB_G0284409, DDB_G0285501, DDB_G0292888
		GO:0031543	peptidyl-proline dioxygenase activity	0.000780542	5.6561e-06	4	7	27.9884	DDB_G0281783, DDB_G0284409, DDB_G0285501, DDB_G0292888
		GO:0031545	peptidyl-proline 4-dioxygenase activity	0.000780542	5.6561e-06	4	7	27.9884	DDB_G0281783, DDB_G0284409, DDB_G0285501, DDB_G0292888
		GO:0031386	protein tag	0.00170836	1.23794e-05	5	16	15.3062	DDB_G0269458, DDB_G0279721, DDB_G0281703, DDB_G0282369, DDB_G0286907
		GO:0031625	ubiquitin protein ligase binding	0.00931634	6.75097e-05	5	22	11.1318	DDB_G0269458, DDB_G0279721, DDB_G0281703, DDB_G0282369, DDB_G0286907
		GO:0031624	ubiquitin conjugating enzyme binding	0.00931634	6.75097e-05	5	22	11.1318	DDB_G0270130, DDB_G0283425, DDB_G0285763, DDB_G0291011, DDB_G0292120
		GO:0044389	ubiquitin-like protein ligase binding	0.00931634	6.75097e-05	5	22	11.1318	DDB_G0269458, DDB_G0279721, DDB_G0281703, DDB_G0282369, DDB_G0286907
		GO:0044390	ubiquitin-like protein conjugating enzyme binding	0.0117071	8.48344e-05	5	23	10.6478	DDB_G0270130, DDB_G0283425, DDB_G0285763, DDB_G0291011, DDB_G0292120
		GO:0016705	oxidoreductase activity, acting on paired donors, with incorporation or reduction of molecular oxygen	0.0360364	0.000261134	8	82	4.77851	DDB_G0277137, DDB_G0281783, DDB_G0282419, DDB_G0284409, DDB_G0285501, DDB_G0287695, DDB_G0292888, DDB_G0349042
		GO:0031418	L-ascorbic acid binding	0.0382178	0.000276941	3	7	20.9913	DDB_G0281783, DDB_G0284409, DDB_G0285501
Down-regulated genes 1hpi	Biological process	GO:0042254	ribosome biogenesis	2.60655e-58	9.54782e-61	53	203	23.7488	DDB_G0268868, DDB_G0269312, DDB_G0269344, DDB_G0269688, DDB_G0269722, DDB_G0269972, DDB_G0270156, DDB_G0270202, DDB_G0271306, DDB_G0272789, DDB_G0274325, DDB_G0274521, DDB_G0276283, DDB_G0276411, DDB_G0276815, DDB_G0277019, DDB_G0278331, DDB_G0278751, DDB_G0279083, DDB_G0279205, DDB_G0279245, DDB_G0279371, DDB_G0279903, DDB_G0280147, DDB_G0280407, DDB_G0280489, DDB_G0281685, DDB_G0281711, DDB_G02…
		GO:0022613	ribonucleoprotein complex biogenesis	5.46088e-52	2.00032e-54	54	277	17.7327	DDB_G0268868, DDB_G0269304, DDB_G0269312, DDB_G0269344, DDB_G0269688, DDB_G0269722, DDB_G0269972, DDB_G0270156, DDB_G0270202, DDB_G0271306, DDB_G0272789, DDB_G0274325, DDB_G0274521, DDB_G0276283, DDB_G0276411, DDB_G0276815, DDB_G0277019, DDB_G0278331, DDB_G0278751, DDB_G0279083, DDB_G0279205, DDB_G0279245, DDB_G0279371, DDB_G0279903, DDB_G0280147, DDB_G0280407, DDB_G0280489, DDB_G0281685, DDB_G02…
		GO:0006364	rRNA processing	3.74815e-48	1.37295e-50	42	139	27.485	DDB_G0268868, DDB_G0269312, DDB_G0269722, DDB_G0269972, DDB_G0270156, DDB_G0270202, DDB_G0274325, DDB_G0274521, DDB_G0276283, DDB_G0276411, DDB_G0276815, DDB_G0277019, DDB_G0278331, DDB_G0278751, DDB_G0279083, DDB_G0279245, DDB_G0279371, DDB_G0279903, DDB_G0280147, DDB_G0280407, DDB_G0280489, DDB_G0281685, DDB_G0281711, DDB_G0281839, DDB_G0282243, DDB_G0282741, DDB_G0284017, DDB_G0284621, DDB_G02…
		GO:0016072	rRNA metabolic process	5.64203e-47	2.06668e-49	42	147	25.9893	DDB_G0268868, DDB_G0269312, DDB_G0269722, DDB_G0269972, DDB_G0270156, DDB_G0270202, DDB_G0274325, DDB_G0274521, DDB_G0276283, DDB_G0276411, DDB_G0276815, DDB_G0277019, DDB_G0278331, DDB_G0278751, DDB_G0279083, DDB_G0279245, DDB_G0279371, DDB_G0279903, DDB_G0280147, DDB_G0280407, DDB_G0280489, DDB_G0281685, DDB_G0281711, DDB_G0281839, DDB_G0282243, DDB_G0282741, DDB_G0284017, DDB_G0284621, DDB_G02…
		GO:0034470	ncRNA processing	1.44525e-37	5.29395e-40	44	272	14.7145	DDB_G0268868, DDB_G0269312, DDB_G0269722, DDB_G0269972, DDB_G0270156, DDB_G0270202, DDB_G0273449, DDB_G0274325, DDB_G0274521, DDB_G0276283, DDB_G0276411, DDB_G0276815, DDB_G0277019, DDB_G0278331, DDB_G0278751, DDB_G0278965, DDB_G0279083, DDB_G0279245, DDB_G0279371, DDB_G0279903, DDB_G0280147, DDB_G0280407, DDB_G0280489, DDB_G0281685, DDB_G0281711, DDB_G0281839, DDB_G0282243, DDB_G0282741, DDB_G02…
		GO:0034660	ncRNA metabolic process	2.91092e-35	1.06627e-37	45	327	12.5178	DDB_G0268868, DDB_G0269312, DDB_G0269722, DDB_G0269972, DDB_G0270152, DDB_G0270156, DDB_G0270202, DDB_G0273449, DDB_G0274325, DDB_G0274521, DDB_G0276283, DDB_G0276411, DDB_G0276815, DDB_G0277019, DDB_G0278331, DDB_G0278751, DDB_G0278965, DDB_G0279083, DDB_G0279245, DDB_G0279371, DDB_G0279903, DDB_G0280147, DDB_G0280407, DDB_G0280489, DDB_G0281685, DDB_G0281711, DDB_G0281839, DDB_G0282243, DDB_G02…
		GO:0044085	cellular component biogenesis	1.88948e-29	6.92119e-32	54	717	6.85073	DDB_G0268868, DDB_G0269304, DDB_G0269312, DDB_G0269344, DDB_G0269688, DDB_G0269722, DDB_G0269972, DDB_G0270156, DDB_G0270202, DDB_G0271306, DDB_G0272789, DDB_G0274325, DDB_G0274521, DDB_G0276283, DDB_G0276411, DDB_G0276815, DDB_G0277019, DDB_G0278331, DDB_G0278751, DDB_G0279083, DDB_G0279205, DDB_G0279245, DDB_G0279371, DDB_G0279903, DDB_G0280147, DDB_G0280407, DDB_G0280489, DDB_G0281685, DDB_G02…
		GO:0006396	RNA processing	2.28124e-27	8.35619e-30	45	491	8.33668	DDB_G0268868, DDB_G0269312, DDB_G0269722, DDB_G0269972, DDB_G0270156, DDB_G0270202, DDB_G0273449, DDB_G0274325, DDB_G0274521, DDB_G0276283, DDB_G0276411, DDB_G0276815, DDB_G0277019, DDB_G0278331, DDB_G0278751, DDB_G0278965, DDB_G0279083, DDB_G0279245, DDB_G0279371, DDB_G0279903, DDB_G0280147, DDB_G0280407, DDB_G0280489, DDB_G0281685, DDB_G0281711, DDB_G0281839, DDB_G0282243, DDB_G0282741, DDB_G02…
		GO:0016070	RNA metabolic process	6.92251e-27	2.53572e-29	58	961	5.48993	DDB_G0267416, DDB_G0268198, DDB_G0268868, DDB_G0269312, DDB_G0269722, DDB_G0269972, DDB_G0270152, DDB_G0270156, DDB_G0270202, DDB_G0271272, DDB_G0273449, DDB_G0274325, DDB_G0274521, DDB_G0275759, DDB_G0276189, DDB_G0276283, DDB_G0276411, DDB_G0276815, DDB_G0277019, DDB_G0278263, DDB_G0278331, DDB_G0278751, DDB_G0278965, DDB_G0279083, DDB_G0279245, DDB_G0279371, DDB_G0279903, DDB_G0280147, DDB_G02…
		GO:0042273	ribosomal large subunit biogenesis	1.41874e-24	5.19687e-27	21	59	32.3764	DDB_G0269344, DDB_G0269688, DDB_G0272789, DDB_G0274521, DDB_G0276411, DDB_G0279205, DDB_G0279903, DDB_G0281839, DDB_G0282243, DDB_G0284383, DDB_G0284817, DDB_G0285829, DDB_G0287937, DDB_G0289415, DDB_G0289699, DDB_G0290029, DDB_G0290555, DDB_G0292216, DDB_G0295477, DDB_G0295761, DDB_G0295765
		GO:0006139	nucleobase-containing compound metabolic process	6.59558e-23	2.41596e-25	65	1481	3.99227	DDB_G0267416, DDB_G0268198, DDB_G0268868, DDB_G0269312, DDB_G0269722, DDB_G0269972, DDB_G0270152, DDB_G0270156, DDB_G0270202, DDB_G0270958, DDB_G0271272, DDB_G0272781, DDB_G0273449, DDB_G0274325, DDB_G0274521, DDB_G0275759, DDB_G0276189, DDB_G0276283, DDB_G0276411, DDB_G0276815, DDB_G0277019, DDB_G0277725, DDB_G0278263, DDB_G0278331, DDB_G0278341, DDB_G0278751, DDB_G0278965, DDB_G0279083, DDB_G02…
		GO:0046483	heterocycle metabolic process	5.44873e-22	1.99587e-24	65	1537	3.84682	DDB_G0267416, DDB_G0268198, DDB_G0268868, DDB_G0269312, DDB_G0269722, DDB_G0269972, DDB_G0270152, DDB_G0270156, DDB_G0270202, DDB_G0270958, DDB_G0271272, DDB_G0272781, DDB_G0273449, DDB_G0274325, DDB_G0274521, DDB_G0275759, DDB_G0276189, DDB_G0276283, DDB_G0276411, DDB_G0276815, DDB_G0277019, DDB_G0277725, DDB_G0278263, DDB_G0278331, DDB_G0278341, DDB_G0278751, DDB_G0278965, DDB_G0279083, DDB_G02…
		GO:0090304	nucleic acid metabolic process	7.48918e-22	2.74329e-24	59	1246	4.30721	DDB_G0267416, DDB_G0268198, DDB_G0268868, DDB_G0269312, DDB_G0269722, DDB_G0269972, DDB_G0270152, DDB_G0270156, DDB_G0270202, DDB_G0270958, DDB_G0271272, DDB_G0273449, DDB_G0274325, DDB_G0274521, DDB_G0275759, DDB_G0276189, DDB_G0276283, DDB_G0276411, DDB_G0276815, DDB_G0277019, DDB_G0278263, DDB_G0278331, DDB_G0278751, DDB_G0278965, DDB_G0279083, DDB_G0279245, DDB_G0279371, DDB_G0279903, DDB_G02…
		GO:0006725	cellular aromatic compound metabolic process	1.092e-21	4.00001e-24	65	1556	3.79984	DDB_G0267416, DDB_G0268198, DDB_G0268868, DDB_G0269312, DDB_G0269722, DDB_G0269972, DDB_G0270152, DDB_G0270156, DDB_G0270202, DDB_G0270958, DDB_G0271272, DDB_G0272781, DDB_G0273449, DDB_G0274325, DDB_G0274521, DDB_G0275759, DDB_G0276189, DDB_G0276283, DDB_G0276411, DDB_G0276815, DDB_G0277019, DDB_G0277725, DDB_G0278263, DDB_G0278331, DDB_G0278341, DDB_G0278751, DDB_G0278965, DDB_G0279083, DDB_G02…
		GO:1901360	organic cyclic compound metabolic process	3.09356e-21	1.13317e-23	65	1585	3.73032	DDB_G0267416, DDB_G0268198, DDB_G0268868, DDB_G0269312, DDB_G0269722, DDB_G0269972, DDB_G0270152, DDB_G0270156, DDB_G0270202, DDB_G0270958, DDB_G0271272, DDB_G0272781, DDB_G0273449, DDB_G0274325, DDB_G0274521, DDB_G0275759, DDB_G0276189, DDB_G0276283, DDB_G0276411, DDB_G0276815, DDB_G0277019, DDB_G0277725, DDB_G0278263, DDB_G0278331, DDB_G0278341, DDB_G0278751, DDB_G0278965, DDB_G0279083, DDB_G02…
		GO:0071840	cellular component organization or biogenesis	6.30977e-18	2.31127e-20	57	1383	3.74899	DDB_G0268868, DDB_G0269304, DDB_G0269312, DDB_G0269344, DDB_G0269688, DDB_G0269722, DDB_G0269972, DDB_G0270156, DDB_G0270202, DDB_G0270958, DDB_G0271306, DDB_G0272789, DDB_G0274325, DDB_G0274521, DDB_G0275519, DDB_G0276283, DDB_G0276411, DDB_G0276815, DDB_G0277019, DDB_G0278331, DDB_G0278751, DDB_G0279083, DDB_G0279205, DDB_G0279245, DDB_G0279371, DDB_G0279903, DDB_G0280147, DDB_G0280407, DDB_G02…
		GO:0010467	gene expression	9.93172e-18	3.63799e-20	62	1664	3.38922	DDB_G0267416, DDB_G0268198, DDB_G0268868, DDB_G0269312, DDB_G0269722, DDB_G0269972, DDB_G0270152, DDB_G0270156, DDB_G0270202, DDB_G0270482, DDB_G0271272, DDB_G0272789, DDB_G0273449, DDB_G0274325, DDB_G0274521, DDB_G0275759, DDB_G0276115, DDB_G0276189, DDB_G0276283, DDB_G0276411, DDB_G0276815, DDB_G0277019, DDB_G0278263, DDB_G0278331, DDB_G0278751, DDB_G0278965, DDB_G0279083, DDB_G0279245, DDB_G02…
		GO:0034641	cellular nitrogen compound metabolic process	4.68569e-17	1.71637e-19	70	2192	2.90482	DDB_G0267416, DDB_G0268198, DDB_G0268868, DDB_G0269312, DDB_G0269722, DDB_G0269972, DDB_G0270152, DDB_G0270156, DDB_G0270202, DDB_G0270482, DDB_G0270958, DDB_G0271272, DDB_G0272781, DDB_G0272789, DDB_G0273449, DDB_G0274325, DDB_G0274521, DDB_G0275759, DDB_G0276115, DDB_G0276189, DDB_G0276283, DDB_G0276411, DDB_G0276815, DDB_G0277019, DDB_G0277725, DDB_G0278263, DDB_G0278331, DDB_G0278341, DDB_G02…
		GO:0030490	maturation of SSU-rRNA	1.49793e-13	5.48693e-16	12	33	33.0772	DDB_G0268868, DDB_G0269972, DDB_G0270202, DDB_G0274521, DDB_G0276283, DDB_G0276815, DDB_G0278331, DDB_G0278751, DDB_G0279245, DDB_G0280489, DDB_G0284621, DDB_G0287891
		GO:0000462	maturation of SSU-rRNA from tricistronic rRNA transcript (SSU-rRNA, 5.8S rRNA, LSU-rRNA)	8.60238e-12	3.15106e-14	10	24	37.901	DDB_G0269972, DDB_G0270202, DDB_G0274521, DDB_G0276283, DDB_G0276815, DDB_G0278331, DDB_G0278751, DDB_G0280489, DDB_G0284621, DDB_G0287891
		GO:0042274	ribosomal small subunit biogenesis	2.55863e-11	9.37226e-14	12	48	22.7406	DDB_G0268868, DDB_G0269972, DDB_G0270202, DDB_G0274521, DDB_G0276283, DDB_G0276815, DDB_G0278331, DDB_G0278751, DDB_G0279245, DDB_G0280489, DDB_G0284621, DDB_G0287891
		GO:0000027	ribosomal large subunit assembly	8.57797e-10	3.14211e-12	9	25	32.7465	DDB_G0272789, DDB_G0274521, DDB_G0276411, DDB_G0279205, DDB_G0285829, DDB_G0287937, DDB_G0292216, DDB_G0295761, DDB_G0295765
		GO:0006807	nitrogen compound metabolic process	2.27824e-09	8.34521e-12	75	3421	1.99421	DDB_G0267416, DDB_G0268198, DDB_G0268868, DDB_G0269312, DDB_G0269722, DDB_G0269972, DDB_G0270152, DDB_G0270156, DDB_G0270202, DDB_G0270482, DDB_G0270958, DDB_G0271272, DDB_G0272781, DDB_G0272789, DDB_G0272815, DDB_G0273449, DDB_G0274325, DDB_G0274521, DDB_G0275759, DDB_G0276115, DDB_G0276189, DDB_G0276283, DDB_G0276411, DDB_G0276439, DDB_G0276815, DDB_G0277019, DDB_G0277725, DDB_G0278263, DDB_G02…
		GO:0042255	ribosome assembly	7.04861e-09	2.58191e-11	10	43	21.154	DDB_G0272789, DDB_G0274521, DDB_G0276411, DDB_G0279205, DDB_G0285829, DDB_G0287937, DDB_G0292216, DDB_G0295477, DDB_G0295761, DDB_G0295765
		GO:0043170	macromolecule metabolic process	4.5249e-08	1.65747e-10	68	3080	2.00826	DDB_G0267416, DDB_G0268198, DDB_G0268868, DDB_G0269312, DDB_G0269722, DDB_G0269972, DDB_G0270152, DDB_G0270156, DDB_G0270202, DDB_G0270482, DDB_G0270958, DDB_G0271272, DDB_G0272781, DDB_G0272789, DDB_G0272815, DDB_G0273449, DDB_G0274325, DDB_G0274521, DDB_G0275759, DDB_G0276115, DDB_G0276189, DDB_G0276283, DDB_G0276411, DDB_G0276439, DDB_G0276815, DDB_G0277019, DDB_G0278263, DDB_G0278331, DDB_G02…
		GO:0044238	primary metabolic process	9.36999e-08	3.43223e-10	75	3673	1.85739	DDB_G0267416, DDB_G0268198, DDB_G0268868, DDB_G0269312, DDB_G0269722, DDB_G0269972, DDB_G0270152, DDB_G0270156, DDB_G0270202, DDB_G0270482, DDB_G0270958, DDB_G0271272, DDB_G0272781, DDB_G0272789, DDB_G0272815, DDB_G0273105, DDB_G0273449, DDB_G0274325, DDB_G0274521, DDB_G0275759, DDB_G0276115, DDB_G0276189, DDB_G0276283, DDB_G0276411, DDB_G0276815, DDB_G0277019, DDB_G0277725, DDB_G0278263, DDB_G02…
		GO:0044237	cellular metabolic process	2.5086e-07	9.18903e-10	75	3745	1.82168	DDB_G0267416, DDB_G0268198, DDB_G0268868, DDB_G0269312, DDB_G0269722, DDB_G0269972, DDB_G0270152, DDB_G0270156, DDB_G0270202, DDB_G0270482, DDB_G0270958, DDB_G0271272, DDB_G0272781, DDB_G0272789, DDB_G0272815, DDB_G0273449, DDB_G0274325, DDB_G0274521, DDB_G0275759, DDB_G0276115, DDB_G0276189, DDB_G0276283, DDB_G0276411, DDB_G0276439, DDB_G0276815, DDB_G0277019, DDB_G0277725, DDB_G0278263, DDB_G02…
		GO:0071704	organic substance metabolic process	5.31185e-07	1.94573e-09	76	3883	1.78036	DDB_G0267416, DDB_G0268198, DDB_G0268868, DDB_G0269312, DDB_G0269722, DDB_G0269972, DDB_G0270152, DDB_G0270156, DDB_G0270202, DDB_G0270482, DDB_G0270958, DDB_G0271272, DDB_G0272781, DDB_G0272789, DDB_G0272815, DDB_G0273105, DDB_G0273449, DDB_G0274325, DDB_G0274521, DDB_G0275759, DDB_G0276115, DDB_G0276189, DDB_G0276283, DDB_G0276411, DDB_G0276439, DDB_G0276815, DDB_G0277019, DDB_G0277725, DDB_G02…
		GO:0000470	maturation of LSU-rRNA	4.82241e-06	1.76645e-08	6	17	32.1044	DDB_G0279903, DDB_G0281839, DDB_G0282243, DDB_G0289415, DDB_G0289699, DDB_G0292216
		GO:0006360	transcription by RNA polymerase I	1.0383e-05	3.80329e-08	6	19	28.725	DDB_G0268198, DDB_G0275759, DDB_G0276189, DDB_G0278263, DDB_G0282339, DDB_G0293560
		GO:0022618	ribonucleoprotein complex assembly	1.96305e-05	7.19067e-08	11	119	8.40829	DDB_G0269304, DDB_G0272789, DDB_G0274521, DDB_G0276411, DDB_G0279205, DDB_G0285829, DDB_G0287937, DDB_G0292216, DDB_G0295477, DDB_G0295761, DDB_G0295765
		GO:0009987	cellular process	2.89146e-05	1.05914e-07	85	4997	1.54729	DDB_G0267416, DDB_G0268198, DDB_G0268868, DDB_G0269304, DDB_G0269312, DDB_G0269688, DDB_G0269722, DDB_G0269972, DDB_G0270152, DDB_G0270156, DDB_G0270202, DDB_G0270482, DDB_G0270958, DDB_G0271272, DDB_G0272781, DDB_G0272789, DDB_G0272815, DDB_G0273449, DDB_G0274325, DDB_G0274521, DDB_G0275519, DDB_G0275759, DDB_G0276115, DDB_G0276189, DDB_G0276283, DDB_G0276411, DDB_G0276439, DDB_G0276815, DDB_G02…
		GO:0071826	ribonucleoprotein complex subunit organization	3.26524e-05	1.19606e-07	11	125	8.00469	DDB_G0269304, DDB_G0272789, DDB_G0274521, DDB_G0276411, DDB_G0279205, DDB_G0285829, DDB_G0287937, DDB_G0292216, DDB_G0295477, DDB_G0295761, DDB_G0295765
		GO:0008152	metabolic process	3.80693e-05	1.39448e-07	77	4324	1.61982	DDB_G0267416, DDB_G0268198, DDB_G0268868, DDB_G0269312, DDB_G0269722, DDB_G0269972, DDB_G0270152, DDB_G0270156, DDB_G0270202, DDB_G0270482, DDB_G0270958, DDB_G0271272, DDB_G0272781, DDB_G0272789, DDB_G0272815, DDB_G0273105, DDB_G0273449, DDB_G0274325, DDB_G0274521, DDB_G0275759, DDB_G0276115, DDB_G0276189, DDB_G0276283, DDB_G0276411, DDB_G0276439, DDB_G0276815, DDB_G0277019, DDB_G0277725, DDB_G02…
		GO:0070925	organelle assembly	0.000129378	4.73911e-07	10	114	7.97916	DDB_G0272789, DDB_G0274521, DDB_G0276411, DDB_G0279205, DDB_G0285829, DDB_G0287937, DDB_G0292216, DDB_G0295477, DDB_G0295761, DDB_G0295765
		GO:0000463	maturation of LSU-rRNA from tricistronic rRNA transcript (SSU-rRNA, 5.8S rRNA, LSU-rRNA)	0.00176208	6.4545e-06	4	12	30.3208	DDB_G0279903, DDB_G0281839, DDB_G0289415, DDB_G0292216
		GO:0000154	rRNA modification	0.00181012	6.63046e-06	5	25	18.1925	DDB_G0268868, DDB_G0269722, DDB_G0281685, DDB_G0285489, DDB_G0289699
		GO:0000466	maturation of 5.8S rRNA from tricistronic rRNA transcript (SSU-rRNA, 5.8S rRNA, LSU-rRNA)	0.00811788	2.97358e-05	4	17	21.4029	DDB_G0274521, DDB_G0279903, DDB_G0281839, DDB_G0289415
		GO:0000460	maturation of 5.8S rRNA	0.016108	5.90035e-05	4	20	18.1925	DDB_G0274521, DDB_G0279903, DDB_G0281839, DDB_G0289415
		GO:0009451	RNA modification	0.0188699	6.91205e-05	8	125	5.82159	DDB_G0268868, DDB_G0269722, DDB_G0273449, DDB_G0278965, DDB_G0280463, DDB_G0281685, DDB_G0285489, DDB_G0289699
		GO:0070476	rRNA (guanine-N7)-methylation	0.0327489	0.000119959	2	2	90.9624	DDB_G0269722, DDB_G0285489
	Cellular component	GO:0005730	nucleolus	1.73147e-70	2.16434e-72	59	196	27.3815	DDB_G0268198, DDB_G0268868, DDB_G0269688, DDB_G0269722, DDB_G0269972, DDB_G0270156, DDB_G0271240, DDB_G0271272, DDB_G0272789, DDB_G0274325, DDB_G0274521, DDB_G0275759, DDB_G0276283, DDB_G0276411, DDB_G0276815, DDB_G0276947, DDB_G0277019, DDB_G0278263, DDB_G0278331, DDB_G0278751, DDB_G0279245, DDB_G0279371, DDB_G0279903, DDB_G0280147, DDB_G0280407, DDB_G0280489, DDB_G0281685, DDB_G0281711, DDB_G02…
		GO:0031981	nuclear lumen	9.9205e-48	1.24006e-49	62	517	10.9085	DDB_G0268198, DDB_G0268868, DDB_G0269304, DDB_G0269688, DDB_G0269722, DDB_G0269972, DDB_G0270156, DDB_G0270336, DDB_G0271240, DDB_G0271272, DDB_G0271306, DDB_G0272789, DDB_G0274325, DDB_G0274521, DDB_G0275759, DDB_G0276283, DDB_G0276411, DDB_G0276815, DDB_G0276947, DDB_G0277019, DDB_G0278263, DDB_G0278331, DDB_G0278751, DDB_G0279245, DDB_G0279371, DDB_G0279903, DDB_G0280147, DDB_G0280407, DDB_G02…
		GO:0043233	organelle lumen	2.7602e-46	3.45025e-48	66	657	9.13778	DDB_G0267416, DDB_G0268198, DDB_G0268868, DDB_G0269304, DDB_G0269688, DDB_G0269722, DDB_G0269972, DDB_G0270152, DDB_G0270156, DDB_G0270336, DDB_G0271240, DDB_G0271272, DDB_G0271306, DDB_G0272789, DDB_G0274325, DDB_G0274521, DDB_G0275759, DDB_G0276283, DDB_G0276411, DDB_G0276815, DDB_G0276947, DDB_G0277019, DDB_G0278263, DDB_G0278331, DDB_G0278751, DDB_G0279245, DDB_G0279371, DDB_G0279903, DDB_G02…
		GO:0031974	membrane-enclosed lumen	2.7602e-46	3.45025e-48	66	657	9.13778	DDB_G0267416, DDB_G0268198, DDB_G0268868, DDB_G0269304, DDB_G0269688, DDB_G0269722, DDB_G0269972, DDB_G0270152, DDB_G0270156, DDB_G0270336, DDB_G0271240, DDB_G0271272, DDB_G0271306, DDB_G0272789, DDB_G0274325, DDB_G0274521, DDB_G0275759, DDB_G0276283, DDB_G0276411, DDB_G0276815, DDB_G0276947, DDB_G0277019, DDB_G0278263, DDB_G0278331, DDB_G0278751, DDB_G0279245, DDB_G0279371, DDB_G0279903, DDB_G02…
		GO:0070013	intracellular organelle lumen	2.7602e-46	3.45025e-48	66	657	9.13778	DDB_G0267416, DDB_G0268198, DDB_G0268868, DDB_G0269304, DDB_G0269688, DDB_G0269722, DDB_G0269972, DDB_G0270152, DDB_G0270156, DDB_G0270336, DDB_G0271240, DDB_G0271272, DDB_G0271306, DDB_G0272789, DDB_G0274325, DDB_G0274521, DDB_G0275759, DDB_G0276283, DDB_G0276411, DDB_G0276815, DDB_G0276947, DDB_G0277019, DDB_G0278263, DDB_G0278331, DDB_G0278751, DDB_G0279245, DDB_G0279371, DDB_G0279903, DDB_G02…
		GO:0030684	preribosome	1.81752e-41	2.27191e-43	31	70	40.2834	DDB_G0269972, DDB_G0271240, DDB_G0274521, DDB_G0276283, DDB_G0276815, DDB_G0277019, DDB_G0278331, DDB_G0278751, DDB_G0279245, DDB_G0279371, DDB_G0279903, DDB_G0280489, DDB_G0281839, DDB_G0282243, DDB_G0282623, DDB_G0284383, DDB_G0284621, DDB_G0284817, DDB_G0285679, DDB_G0285829, DDB_G0286941, DDB_G0287537, DDB_G0287891, DDB_G0288565, DDB_G0289415, DDB_G0290029, DDB_G0290031, DDB_G0290181, DDB_G02…
		GO:0044428	nuclear part	8.00405e-39	1.00051e-40	63	754	7.60031	DDB_G0268198, DDB_G0268868, DDB_G0269304, DDB_G0269688, DDB_G0269722, DDB_G0269860, DDB_G0269972, DDB_G0270156, DDB_G0270336, DDB_G0271240, DDB_G0271272, DDB_G0271306, DDB_G0272789, DDB_G0274325, DDB_G0274521, DDB_G0275759, DDB_G0276283, DDB_G0276411, DDB_G0276815, DDB_G0276947, DDB_G0277019, DDB_G0278263, DDB_G0278331, DDB_G0278751, DDB_G0279245, DDB_G0279371, DDB_G0279903, DDB_G0280147, DDB_G02…
		GO:0043232	intracellular non-membrane-bounded organelle	1.25474e-32	1.56843e-34	62	917	6.15013	DDB_G0268198, DDB_G0268868, DDB_G0269688, DDB_G0269722, DDB_G0269972, DDB_G0270156, DDB_G0271240, DDB_G0271272, DDB_G0272789, DDB_G0274325, DDB_G0274521, DDB_G0275759, DDB_G0276283, DDB_G0276411, DDB_G0276815, DDB_G0276947, DDB_G0277019, DDB_G0278263, DDB_G0278331, DDB_G0278751, DDB_G0279245, DDB_G0279371, DDB_G0279903, DDB_G0280147, DDB_G0280393, DDB_G0280407, DDB_G0280489, DDB_G0281685, DDB_G02…
		GO:0043228	non-membrane-bounded organelle	1.25474e-32	1.56843e-34	62	917	6.15013	DDB_G0268198, DDB_G0268868, DDB_G0269688, DDB_G0269722, DDB_G0269972, DDB_G0270156, DDB_G0271240, DDB_G0271272, DDB_G0272789, DDB_G0274325, DDB_G0274521, DDB_G0275759, DDB_G0276283, DDB_G0276411, DDB_G0276815, DDB_G0276947, DDB_G0277019, DDB_G0278263, DDB_G0278331, DDB_G0278751, DDB_G0279245, DDB_G0279371, DDB_G0279903, DDB_G0280147, DDB_G0280393, DDB_G0280407, DDB_G0280489, DDB_G0281685, DDB_G02…
		GO:0005634	nucleus	7.16133e-28	8.95166e-30	69	1432	4.38297	DDB_G0268198, DDB_G0268868, DDB_G0269304, DDB_G0269312, DDB_G0269688, DDB_G0269722, DDB_G0269860, DDB_G0269972, DDB_G0270156, DDB_G0270336, DDB_G0271240, DDB_G0271272, DDB_G0271306, DDB_G0272789, DDB_G0273449, DDB_G0274325, DDB_G0274521, DDB_G0275759, DDB_G0276283, DDB_G0276411, DDB_G0276815, DDB_G0276947, DDB_G0277019, DDB_G0278263, DDB_G0278331, DDB_G0278751, DDB_G0279205, DDB_G0279245, DDB_G02…
		GO:0032040	small-subunit processome	2.68652e-21	3.35815e-23	16	34	42.8058	DDB_G0269972, DDB_G0271240, DDB_G0276283, DDB_G0276815, DDB_G0277019, DDB_G0279245, DDB_G0279371, DDB_G0280489, DDB_G0282243, DDB_G0282623, DDB_G0284621, DDB_G0285679, DDB_G0286941, DDB_G0287537, DDB_G0290181, DDB_G0293412
		GO:0044446	intracellular organelle part	2.37466e-20	2.96832e-22	69	1907	3.29125	DDB_G0267416, DDB_G0268198, DDB_G0268868, DDB_G0269304, DDB_G0269688, DDB_G0269722, DDB_G0269860, DDB_G0269972, DDB_G0270152, DDB_G0270156, DDB_G0270336, DDB_G0271240, DDB_G0271272, DDB_G0271306, DDB_G0272789, DDB_G0273105, DDB_G0274325, DDB_G0274521, DDB_G0275759, DDB_G0276283, DDB_G0276411, DDB_G0276815, DDB_G0276947, DDB_G0277019, DDB_G0278263, DDB_G0278331, DDB_G0278751, DDB_G0279245, DDB_G02…
		GO:1990904	ribonucleoprotein complex	2.43866e-20	3.04832e-22	36	431	7.59779	DDB_G0269972, DDB_G0270156, DDB_G0271240, DDB_G0272789, DDB_G0274521, DDB_G0276283, DDB_G0276815, DDB_G0277019, DDB_G0278331, DDB_G0278751, DDB_G0279245, DDB_G0279371, DDB_G0279903, DDB_G0280393, DDB_G0280489, DDB_G0281839, DDB_G0282243, DDB_G0282623, DDB_G0284383, DDB_G0284621, DDB_G0284817, DDB_G0285679, DDB_G0285829, DDB_G0286941, DDB_G0287537, DDB_G0287891, DDB_G0288565, DDB_G0289415, DDB_G02…
		GO:0044422	organelle part	2.44859e-20	3.06074e-22	69	1908	3.28952	DDB_G0267416, DDB_G0268198, DDB_G0268868, DDB_G0269304, DDB_G0269688, DDB_G0269722, DDB_G0269860, DDB_G0269972, DDB_G0270152, DDB_G0270156, DDB_G0270336, DDB_G0271240, DDB_G0271272, DDB_G0271306, DDB_G0272789, DDB_G0273105, DDB_G0274325, DDB_G0274521, DDB_G0275759, DDB_G0276283, DDB_G0276411, DDB_G0276815, DDB_G0276947, DDB_G0277019, DDB_G0278263, DDB_G0278331, DDB_G0278751, DDB_G0279245, DDB_G02…
		GO:0044452	nucleolar part	1.0146e-19	1.26824e-21	17	50	30.9272	DDB_G0268198, DDB_G0271240, DDB_G0275759, DDB_G0276283, DDB_G0277019, DDB_G0278263, DDB_G0279245, DDB_G0279903, DDB_G0281839, DDB_G0282243, DDB_G0282339, DDB_G0282623, DDB_G0284621, DDB_G0285679, DDB_G0289415, DDB_G0289699, DDB_G0293560
		GO:0043231	intracellular membrane-bounded organelle	1.40396e-17	1.75495e-19	78	2721	2.60752	DDB_G0267416, DDB_G0268198, DDB_G0268868, DDB_G0269304, DDB_G0269312, DDB_G0269688, DDB_G0269722, DDB_G0269860, DDB_G0269972, DDB_G0270152, DDB_G0270156, DDB_G0270336, DDB_G0270482, DDB_G0271240, DDB_G0271272, DDB_G0271306, DDB_G0272789, DDB_G0272815, DDB_G0273105, DDB_G0273449, DDB_G0274325, DDB_G0274521, DDB_G0275759, DDB_G0276283, DDB_G0276411, DDB_G0276815, DDB_G0276947, DDB_G0277019, DDB_G02…
		GO:0030686	90S preribosome	2.652e-17	3.31499e-19	13	27	43.7967	DDB_G0271240, DDB_G0276283, DDB_G0277019, DDB_G0278751, DDB_G0279245, DDB_G0279903, DDB_G0281839, DDB_G0282623, DDB_G0284383, DDB_G0284621, DDB_G0287537, DDB_G0287891, DDB_G0289415
		GO:0043227	membrane-bounded organelle	2.92106e-17	3.65133e-19	82	3038	2.45521	DDB_G0267416, DDB_G0268198, DDB_G0268868, DDB_G0269304, DDB_G0269312, DDB_G0269688, DDB_G0269722, DDB_G0269860, DDB_G0269972, DDB_G0270152, DDB_G0270156, DDB_G0270336, DDB_G0270482, DDB_G0271240, DDB_G0271272, DDB_G0271306, DDB_G0272789, DDB_G0272815, DDB_G0273105, DDB_G0273449, DDB_G0274325, DDB_G0274521, DDB_G0275759, DDB_G0276283, DDB_G0276411, DDB_G0276815, DDB_G0276947, DDB_G0277019, DDB_G02…
		GO:0043229	intracellular organelle	6.12283e-16	7.65354e-18	84	3333	2.29248	DDB_G0267416, DDB_G0268198, DDB_G0268868, DDB_G0269304, DDB_G0269312, DDB_G0269688, DDB_G0269722, DDB_G0269860, DDB_G0269972, DDB_G0270152, DDB_G0270156, DDB_G0270336, DDB_G0270482, DDB_G0271240, DDB_G0271272, DDB_G0271306, DDB_G0272789, DDB_G0272815, DDB_G0273105, DDB_G0273449, DDB_G0274325, DDB_G0274521, DDB_G0275759, DDB_G0276283, DDB_G0276411, DDB_G0276815, DDB_G0276947, DDB_G0277019, DDB_G02…
		GO:0043226	organelle	6.50177e-16	8.12721e-18	84	3336	2.29042	DDB_G0267416, DDB_G0268198, DDB_G0268868, DDB_G0269304, DDB_G0269312, DDB_G0269688, DDB_G0269722, DDB_G0269860, DDB_G0269972, DDB_G0270152, DDB_G0270156, DDB_G0270336, DDB_G0270482, DDB_G0271240, DDB_G0271272, DDB_G0271306, DDB_G0272789, DDB_G0272815, DDB_G0273105, DDB_G0273449, DDB_G0274325, DDB_G0274521, DDB_G0275759, DDB_G0276283, DDB_G0276411, DDB_G0276815, DDB_G0276947, DDB_G0277019, DDB_G02…
		GO:0030687	preribosome, large subunit precursor	5.82944e-14	7.2868e-16	11	25	40.0235	DDB_G0274521, DDB_G0279903, DDB_G0281839, DDB_G0284383, DDB_G0284817, DDB_G0285829, DDB_G0289415, DDB_G0290029, DDB_G0290031, DDB_G0290555, DDB_G0295477
		GO:0044424	intracellular part	3.75367e-12	4.69209e-14	88	4144	1.93163	DDB_G0267416, DDB_G0268198, DDB_G0268868, DDB_G0269304, DDB_G0269312, DDB_G0269688, DDB_G0269722, DDB_G0269860, DDB_G0269972, DDB_G0270152, DDB_G0270156, DDB_G0270336, DDB_G0270482, DDB_G0271240, DDB_G0271272, DDB_G0271306, DDB_G0272781, DDB_G0272789, DDB_G0272815, DDB_G0273105, DDB_G0273449, DDB_G0274325, DDB_G0274521, DDB_G0275759, DDB_G0276283, DDB_G0276411, DDB_G0276815, DDB_G0276947, DDB_G02…
		GO:0044464	cell part	2.35605e-11	2.94506e-13	91	4522	1.83051	DDB_G0267416, DDB_G0268198, DDB_G0268868, DDB_G0269304, DDB_G0269312, DDB_G0269688, DDB_G0269722, DDB_G0269860, DDB_G0269972, DDB_G0270152, DDB_G0270156, DDB_G0270214, DDB_G0270336, DDB_G0270482, DDB_G0271240, DDB_G0271272, DDB_G0271306, DDB_G0272781, DDB_G0272789, DDB_G0272815, DDB_G0273105, DDB_G0273449, DDB_G0274325, DDB_G0274521, DDB_G0275759, DDB_G0276283, DDB_G0276411, DDB_G0276815, DDB_G02…
		GO:0005623	cell	4.134e-11	5.1675e-13	91	4560	1.81526	DDB_G0267416, DDB_G0268198, DDB_G0268868, DDB_G0269304, DDB_G0269312, DDB_G0269688, DDB_G0269722, DDB_G0269860, DDB_G0269972, DDB_G0270152, DDB_G0270156, DDB_G0270214, DDB_G0270336, DDB_G0270482, DDB_G0271240, DDB_G0271272, DDB_G0271306, DDB_G0272781, DDB_G0272789, DDB_G0272815, DDB_G0273105, DDB_G0273449, DDB_G0274325, DDB_G0274521, DDB_G0275759, DDB_G0276283, DDB_G0276411, DDB_G0276815, DDB_G02…
		GO:0005622	intracellular	9.21626e-11	1.15203e-12	88	4353	1.83889	DDB_G0267416, DDB_G0268198, DDB_G0268868, DDB_G0269304, DDB_G0269312, DDB_G0269688, DDB_G0269722, DDB_G0269860, DDB_G0269972, DDB_G0270152, DDB_G0270156, DDB_G0270336, DDB_G0270482, DDB_G0271240, DDB_G0271272, DDB_G0271306, DDB_G0272781, DDB_G0272789, DDB_G0272815, DDB_G0273105, DDB_G0273449, DDB_G0274325, DDB_G0274521, DDB_G0275759, DDB_G0276283, DDB_G0276411, DDB_G0276815, DDB_G0276947, DDB_G02…
		GO:0034388	Pwp2p-containing subcomplex of 90S preribosome	7.08622e-08	8.85777e-10	5	6	75.802	DDB_G0271240, DDB_G0276283, DDB_G0277019, DDB_G0282623, DDB_G0284621
		GO:0032991	protein-containing complex	8.53563e-07	1.06695e-08	44	1672	2.39375	DDB_G0267416, DDB_G0268198, DDB_G0269972, DDB_G0270156, DDB_G0270214, DDB_G0271240, DDB_G0272789, DDB_G0274521, DDB_G0275759, DDB_G0276283, DDB_G0276815, DDB_G0277019, DDB_G0278263, DDB_G0278331, DDB_G0278341, DDB_G0278751, DDB_G0279245, DDB_G0279371, DDB_G0279903, DDB_G0280393, DDB_G0280489, DDB_G0281839, DDB_G0282243, DDB_G0282339, DDB_G0282623, DDB_G0284383, DDB_G0284621, DDB_G0284817, DDB_G02…
		GO:0005736	RNA polymerase I complex	1.42866e-05	1.78582e-07	5	13	34.9855	DDB_G0268198, DDB_G0275759, DDB_G0278263, DDB_G0282339, DDB_G0293560
		GO:0070545	PeBoW complex	0.00352186	4.40232e-05	3	7	38.9839	DDB_G0279903, DDB_G0281839, DDB_G0289415
		GO:0005732	small nucleolar ribonucleoprotein complex	0.00700618	8.75772e-05	4	22	16.5386	DDB_G0279245, DDB_G0282243, DDB_G0285679, DDB_G0289699
		GO:0030688	preribosome, small subunit precursor	0.00831702	0.000103963	3	9	30.3208	DDB_G0278331, DDB_G0287537, DDB_G0288565
		GO:0000428	DNA-directed RNA polymerase complex	0.00857158	0.000107145	6	69	7.90977	DDB_G0267416, DDB_G0268198, DDB_G0275759, DDB_G0278263, DDB_G0282339, DDB_G0293560
		GO:0030880	RNA polymerase complex	0.0126652	0.000158315	6	74	7.37533	DDB_G0267416, DDB_G0268198, DDB_G0275759, DDB_G0278263, DDB_G0282339, DDB_G0293560
		GO:0030689	Noc complex	0.0285824	0.00035728	2	3	60.6416	DDB_G0284383, DDB_G0287537
	Molecular function	GO:0030515	snoRNA binding	5.82713e-13	5.82713e-15	10	21	43.3154	DDB_G0276283, DDB_G0278331, DDB_G0282623, DDB_G0284621, DDB_G0285679, DDB_G0287537, DDB_G0287891, DDB_G0288565, DDB_G0289699, DDB_G0293412
		GO:0003676	nucleic acid binding	2.27858e-10	2.27858e-12	47	1459	2.93025	DDB_G0267416, DDB_G0268198, DDB_G0270152, DDB_G0270156, DDB_G0270482, DDB_G0271272, DDB_G0272789, DDB_G0274325, DDB_G0275759, DDB_G0275885, DDB_G0276283, DDB_G0278263, DDB_G0278331, DDB_G0278965, DDB_G0280147, DDB_G0280393, DDB_G0280407, DDB_G0280463, DDB_G0280797, DDB_G0281685, DDB_G0281711, DDB_G0281841, DDB_G0282243, DDB_G0282339, DDB_G0282623, DDB_G0282741, DDB_G0284017, DDB_G0284621, DDB_G02…
		GO:0003723	RNA binding	3.30276e-08	3.30276e-10	33	890	3.37276	DDB_G0270156, DDB_G0270482, DDB_G0272789, DDB_G0274325, DDB_G0275885, DDB_G0276283, DDB_G0278331, DDB_G0278965, DDB_G0280147, DDB_G0280393, DDB_G0280407, DDB_G0280463, DDB_G0281685, DDB_G0281711, DDB_G0281841, DDB_G0282243, DDB_G0282623, DDB_G0282741, DDB_G0284017, DDB_G0284621, DDB_G0285679, DDB_G0285829, DDB_G0286399, DDB_G0287537, DDB_G0287891, DDB_G0287937, DDB_G0288551, DDB_G0288565, DDB_G02…
		GO:1901363	heterocyclic compound binding	2.95049e-06	2.95049e-08	58	2693	1.95909	DDB_G0267416, DDB_G0268198, DDB_G0268868, DDB_G0270152, DDB_G0270156, DDB_G0270482, DDB_G0271272, DDB_G0272789, DDB_G0273105, DDB_G0274325, DDB_G0275759, DDB_G0275885, DDB_G0276283, DDB_G0276947, DDB_G0278263, DDB_G0278331, DDB_G0278341, DDB_G0278965, DDB_G0280147, DDB_G0280393, DDB_G0280407, DDB_G0280463, DDB_G0280797, DDB_G0281071, DDB_G0281685, DDB_G0281711, DDB_G0281841, DDB_G0282243, DDB_G02…
		GO:0097159	organic cyclic compound binding	3.48894e-06	3.48894e-08	58	2705	1.9504	DDB_G0267416, DDB_G0268198, DDB_G0268868, DDB_G0270152, DDB_G0270156, DDB_G0270482, DDB_G0271272, DDB_G0272789, DDB_G0273105, DDB_G0274325, DDB_G0275759, DDB_G0275885, DDB_G0276283, DDB_G0276947, DDB_G0278263, DDB_G0278331, DDB_G0278341, DDB_G0278965, DDB_G0280147, DDB_G0280393, DDB_G0280407, DDB_G0280463, DDB_G0280797, DDB_G0281071, DDB_G0281685, DDB_G0281711, DDB_G0281841, DDB_G0282243, DDB_G02…
		GO:0001054	RNA polymerase I activity	1.10873e-05	1.10873e-07	5	12	37.901	DDB_G0268198, DDB_G0275759, DDB_G0278263, DDB_G0282339, DDB_G0293560
		GO:0004386	helicase activity	4.90217e-05	4.90217e-07	9	88	9.30297	DDB_G0274325, DDB_G0280147, DDB_G0280407, DDB_G0281711, DDB_G0281841, DDB_G0282741, DDB_G0284017, DDB_G0292010, DDB_G0293064
		GO:0005488	binding	8.28963e-05	8.28963e-07	74	4237	1.58868	DDB_G0267416, DDB_G0268198, DDB_G0268868, DDB_G0269304, DDB_G0269344, DDB_G0269860, DDB_G0270058, DDB_G0270152, DDB_G0270156, DDB_G0270214, DDB_G0270336, DDB_G0270482, DDB_G0271272, DDB_G0271306, DDB_G0272789, DDB_G0273105, DDB_G0274325, DDB_G0275519, DDB_G0275759, DDB_G0275885, DDB_G0276283, DDB_G0276947, DDB_G0278263, DDB_G0278331, DDB_G0278341, DDB_G0278965, DDB_G0279211, DDB_G0279903, DDB_G02…
		GO:0003899	DNA-directed 5'-3' RNA polymerase activity	0.000164665	1.64665e-06	6	34	16.0522	DDB_G0267416, DDB_G0268198, DDB_G0275759, DDB_G0278263, DDB_G0282339, DDB_G0293560
		GO:0034062	5'-3' RNA polymerase activity	0.000277046	2.77046e-06	6	37	14.7507	DDB_G0267416, DDB_G0268198, DDB_G0275759, DDB_G0278263, DDB_G0282339, DDB_G0293560
		GO:0034511	U3 snoRNA binding	0.000515476	5.15476e-06	3	4	68.2218	DDB_G0278331, DDB_G0287891, DDB_G0293412
		GO:0097747	RNA polymerase activity	0.000516876	5.16876e-06	6	41	13.3116	DDB_G0267416, DDB_G0268198, DDB_G0275759, DDB_G0278263, DDB_G0282339, DDB_G0293560
		GO:0043021	ribonucleoprotein complex binding	0.0063511	6.3511e-05	5	39	11.6618	DDB_G0271306, DDB_G0279903, DDB_G0280393, DDB_G0281839, DDB_G0289415
		GO:0042134	rRNA primary transcript binding	0.035728	0.00035728	2	3	60.6416	DDB_G0285829, DDB_G0287937
		GO:0140098	catalytic activity, acting on RNA	0.0368505	0.000368505	10	245	3.71275	DDB_G0267416, DDB_G0268198, DDB_G0269722, DDB_G0270152, DDB_G0275759, DDB_G0278263, DDB_G0278965, DDB_G0281685, DDB_G0282339, DDB_G0293560
Up-regulated genes 6hpi	Biological process	GO:0006399	tRNA metabolic process	0.00254811	2.9088e-06	30	171	2.48531	DDB_G0269348, DDB_G0269454, DDB_G0272304, DDB_G0272867, DDB_G0273039, DDB_G0273343, DDB_G0274159, DDB_G0274745, DDB_G0275625, DDB_G0276531, DDB_G0276633, DDB_G0278481, DDB_G0278803, DDB_G0278955, DDB_G0282921, DDB_G0283877, DDB_G0284197, DDB_G0285451, DDB_G0285507, DDB_G0286929, DDB_G0287159, DDB_G0287467, DDB_G0288019, DDB_G0288267, DDB_G0289481, DDB_G0290103, DDB_G0290623, DDB_G0291830, DDB_G02…
		GO:0019471	4-hydroxyproline metabolic process	0.0282743	3.22766e-05	5	7	10.1188	DDB_G0281783, DDB_G0284409, DDB_G0285501, DDB_G0287671, DDB_G0292888
		GO:0018401	peptidyl-proline hydroxylation to 4-hydroxy-L-proline	0.0282743	3.22766e-05	5	7	10.1188	DDB_G0281783, DDB_G0284409, DDB_G0285501, DDB_G0287671, DDB_G0292888
		GO:0018126	protein hydroxylation	0.0282743	3.22766e-05	5	7	10.1188	DDB_G0281783, DDB_G0284409, DDB_G0285501, DDB_G0287671, DDB_G0292888
		GO:0019511	peptidyl-proline hydroxylation	0.0282743	3.22766e-05	5	7	10.1188	DDB_G0281783, DDB_G0284409, DDB_G0285501, DDB_G0287671, DDB_G0292888
		GO:0032436	positive regulation of proteasomal ubiquitin-dependent protein catabolic process	0.0306384	3.49753e-05	8	20	5.66651	DDB_G0270130, DDB_G0270432, DDB_G0278981, DDB_G0283425, DDB_G0284325, DDB_G0285763, DDB_G0286289, DDB_G0292120
		GO:2000060	positive regulation of ubiquitin-dependent protein catabolic process	0.0464441	5.30184e-05	8	21	5.39668	DDB_G0270130, DDB_G0270432, DDB_G0278981, DDB_G0283425, DDB_G0284325, DDB_G0285763, DDB_G0286289, DDB_G0292120
		GO:0032434	regulation of proteasomal ubiquitin-dependent protein catabolic process	0.0464441	5.30184e-05	8	21	5.39668	DDB_G0270130, DDB_G0270432, DDB_G0278981, DDB_G0283425, DDB_G0284325, DDB_G0285763, DDB_G0286289, DDB_G0292120
	Molecular function	GO:0004656	procollagen-proline 4-dioxygenase activity	0.00308508	9.79389e-06	5	6	11.8052	DDB_G0281783, DDB_G0284409, DDB_G0285501, DDB_G0287671, DDB_G0292888
		GO:0019798	procollagen-proline dioxygenase activity	0.00308508	9.79389e-06	5	6	11.8052	DDB_G0281783, DDB_G0284409, DDB_G0285501, DDB_G0287671, DDB_G0292888
		GO:0016706	oxidoreductase activity, acting on paired donors, with incorporation or reduction of molecular oxygen, 2-oxoglutarate as one donor, and incorporation of one atom each of oxygen into both donors	0.00628649	1.99571e-05	6	10	8.49977	DDB_G0281783, DDB_G0284409, DDB_G0285501, DDB_G0287671, DDB_G0292888, DDB_G0349042
		GO:0031543	peptidyl-proline dioxygenase activity	0.0101671	3.22766e-05	5	7	10.1188	DDB_G0281783, DDB_G0284409, DDB_G0285501, DDB_G0287671, DDB_G0292888
		GO:0031418	L-ascorbic acid binding	0.0101671	3.22766e-05	5	7	10.1188	DDB_G0270778, DDB_G0281783, DDB_G0284409, DDB_G0285501, DDB_G0287671
		GO:0031545	peptidyl-proline 4-dioxygenase activity	0.0101671	3.22766e-05	5	7	10.1188	DDB_G0281783, DDB_G0284409, DDB_G0285501, DDB_G0287671, DDB_G0292888
		GO:0031624	ubiquitin conjugating enzyme binding	0.0246289	7.81871e-05	8	22	5.15137	DDB_G0270130, DDB_G0270432, DDB_G0278981, DDB_G0283425, DDB_G0284325, DDB_G0285763, DDB_G0286289, DDB_G0292120
		GO:0044390	ubiquitin-like protein conjugating enzyme binding	0.0354423	0.000112515	8	23	4.9274	DDB_G0270130, DDB_G0270432, DDB_G0278981, DDB_G0283425, DDB_G0284325, DDB_G0285763, DDB_G0286289, DDB_G0292120
Down-regulated genes 6hpi	Biological process	GO:0042254	ribosome biogenesis	5.3121e-18	6.28651e-21	44	203	5.49733	DDB_G0269344, DDB_G0269642, DDB_G0269688, DDB_G0269878, DDB_G0269972, DDB_G0270156, DDB_G0274521, DDB_G0276411, DDB_G0276815, DDB_G0277019, DDB_G0277635, DDB_G0278331, DDB_G0279013, DDB_G0279083, DDB_G0279205, DDB_G0279371, DDB_G0279903, DDB_G0280407, DDB_G0280489, DDB_G0281685, DDB_G0281711, DDB_G0281839, DDB_G0282243, DDB_G0284093, DDB_G0284383, DDB_G0284621, DDB_G0284817, DDB_G0285597, DDB_G02…
		GO:0022613	ribonucleoprotein complex biogenesis	2.85146e-16	3.37451e-19	49	277	4.48654	DDB_G0269344, DDB_G0269642, DDB_G0269688, DDB_G0269878, DDB_G0269972, DDB_G0270042, DDB_G0270156, DDB_G0272076, DDB_G0272374, DDB_G0273003, DDB_G0274521, DDB_G0276411, DDB_G0276815, DDB_G0277019, DDB_G0277635, DDB_G0278331, DDB_G0279013, DDB_G0279083, DDB_G0279205, DDB_G0279371, DDB_G0279903, DDB_G0280407, DDB_G0280489, DDB_G0281685, DDB_G0281711, DDB_G0281839, DDB_G0282243, DDB_G0284093, DDB_G02…
		GO:0006364	rRNA processing	3.15825e-15	3.73757e-18	34	139	6.20382	DDB_G0269878, DDB_G0269972, DDB_G0270156, DDB_G0274521, DDB_G0276411, DDB_G0276815, DDB_G0277019, DDB_G0278331, DDB_G0279013, DDB_G0279083, DDB_G0279371, DDB_G0279903, DDB_G0280407, DDB_G0280489, DDB_G0281685, DDB_G0281711, DDB_G0281839, DDB_G0282243, DDB_G0284093, DDB_G0284621, DDB_G0284817, DDB_G0285597, DDB_G0287537, DDB_G0287891, DDB_G0288347, DDB_G0288659, DDB_G0289415, DDB_G0289699, DDB_G02…
		GO:0016072	rRNA metabolic process	2.05313e-14	2.42974e-17	34	147	5.8662	DDB_G0269878, DDB_G0269972, DDB_G0270156, DDB_G0274521, DDB_G0276411, DDB_G0276815, DDB_G0277019, DDB_G0278331, DDB_G0279013, DDB_G0279083, DDB_G0279371, DDB_G0279903, DDB_G0280407, DDB_G0280489, DDB_G0281685, DDB_G0281711, DDB_G0281839, DDB_G0282243, DDB_G0284093, DDB_G0284621, DDB_G0284817, DDB_G0285597, DDB_G0287537, DDB_G0287891, DDB_G0288347, DDB_G0288659, DDB_G0289415, DDB_G0289699, DDB_G02…
		GO:0019693	ribose phosphate metabolic process	4.01629e-12	4.753e-15	32	153	5.30461	DDB_G0268360, DDB_G0271564, DDB_G0271774, DDB_G0273131, DDB_G0274383, DDB_G0274471, DDB_G0275537, DDB_G0276241, DDB_G0276331, DDB_G0276335, DDB_G0276417, DDB_G0277087, DDB_G0278275, DDB_G0278341, DDB_G0280041, DDB_G0280567, DDB_G0281551, DDB_G0282615, DDB_G0283987, DDB_G0284669, DDB_G0284947, DDB_G0285193, DDB_G0288145, DDB_G0288333, DDB_G0288387, DDB_G0288777, DDB_G0288985, DDB_G0290121, DDB_G02…
		GO:0046390	ribose phosphate biosynthetic process	2.87811e-10	3.40604e-13	22	81	6.88863	DDB_G0268360, DDB_G0271564, DDB_G0274471, DDB_G0276241, DDB_G0276331, DDB_G0276335, DDB_G0276417, DDB_G0277087, DDB_G0278341, DDB_G0280041, DDB_G0280567, DDB_G0281551, DDB_G0283987, DDB_G0284669, DDB_G0285193, DDB_G0288145, DDB_G0288333, DDB_G0288387, DDB_G0288985, DDB_G0290121, DDB_G0290401, DDB_G0292994
		GO:0055086	nucleobase-containing small molecule metabolic process	3.03612e-10	3.59305e-13	38	246	3.91781	DDB_G0268360, DDB_G0271564, DDB_G0271774, DDB_G0272781, DDB_G0273131, DDB_G0274383, DDB_G0274471, DDB_G0275537, DDB_G0276241, DDB_G0276331, DDB_G0276335, DDB_G0276417, DDB_G0277087, DDB_G0277725, DDB_G0278275, DDB_G0278341, DDB_G0280041, DDB_G0280567, DDB_G0281551, DDB_G0282615, DDB_G0283987, DDB_G0284203, DDB_G0284669, DDB_G0284915, DDB_G0284947, DDB_G0285193, DDB_G0287985, DDB_G0288145, DDB_G02…
		GO:0009161	ribonucleoside monophosphate metabolic process	7.27378e-10	8.60803e-13	23	93	6.27249	DDB_G0268360, DDB_G0271564, DDB_G0271774, DDB_G0274471, DDB_G0275537, DDB_G0276241, DDB_G0276331, DDB_G0276335, DDB_G0276417, DDB_G0277087, DDB_G0280041, DDB_G0281551, DDB_G0282615, DDB_G0283987, DDB_G0284669, DDB_G0284947, DDB_G0285193, DDB_G0288145, DDB_G0288333, DDB_G0288777, DDB_G0288985, DDB_G0290121, DDB_G0292994
		GO:0009259	ribonucleotide metabolic process	8.30631e-10	9.82996e-13	28	141	5.03656	DDB_G0268360, DDB_G0271564, DDB_G0271774, DDB_G0274383, DDB_G0274471, DDB_G0275537, DDB_G0276241, DDB_G0276331, DDB_G0276335, DDB_G0276417, DDB_G0277087, DDB_G0278341, DDB_G0280041, DDB_G0280567, DDB_G0281551, DDB_G0282615, DDB_G0283987, DDB_G0284947, DDB_G0285193, DDB_G0288145, DDB_G0288333, DDB_G0288387, DDB_G0288777, DDB_G0288985, DDB_G0290121, DDB_G0290401, DDB_G0292458, DDB_G0292994
		GO:0009117	nucleotide metabolic process	9.28331e-10	1.09862e-12	34	207	4.16585	DDB_G0268360, DDB_G0271564, DDB_G0271774, DDB_G0273131, DDB_G0274383, DDB_G0274471, DDB_G0275537, DDB_G0276241, DDB_G0276331, DDB_G0276335, DDB_G0276417, DDB_G0277087, DDB_G0277725, DDB_G0278275, DDB_G0278341, DDB_G0280041, DDB_G0280567, DDB_G0281551, DDB_G0282615, DDB_G0283987, DDB_G0284203, DDB_G0284669, DDB_G0284947, DDB_G0285193, DDB_G0288145, DDB_G0288333, DDB_G0288387, DDB_G0288777, DDB_G02…
		GO:0009260	ribonucleotide biosynthetic process	1.2068e-09	1.42817e-12	21	78	6.82841	DDB_G0268360, DDB_G0271564, DDB_G0274471, DDB_G0276241, DDB_G0276331, DDB_G0276335, DDB_G0276417, DDB_G0277087, DDB_G0278341, DDB_G0280041, DDB_G0280567, DDB_G0281551, DDB_G0283987, DDB_G0285193, DDB_G0288145, DDB_G0288333, DDB_G0288387, DDB_G0288985, DDB_G0290121, DDB_G0290401, DDB_G0292994
		GO:0006753	nucleoside phosphate metabolic process	1.23177e-09	1.45772e-12	34	209	4.12599	DDB_G0268360, DDB_G0271564, DDB_G0271774, DDB_G0273131, DDB_G0274383, DDB_G0274471, DDB_G0275537, DDB_G0276241, DDB_G0276331, DDB_G0276335, DDB_G0276417, DDB_G0277087, DDB_G0277725, DDB_G0278275, DDB_G0278341, DDB_G0280041, DDB_G0280567, DDB_G0281551, DDB_G0282615, DDB_G0283987, DDB_G0284203, DDB_G0284669, DDB_G0284947, DDB_G0285193, DDB_G0288145, DDB_G0288333, DDB_G0288387, DDB_G0288777, DDB_G02…
		GO:0072521	purine-containing compound metabolic process	3.61295e-09	4.27568e-12	29	160	4.59699	DDB_G0268360, DDB_G0271564, DDB_G0271774, DDB_G0274383, DDB_G0274471, DDB_G0275537, DDB_G0276241, DDB_G0276417, DDB_G0277087, DDB_G0277725, DDB_G0278341, DDB_G0281551, DDB_G0282615, DDB_G0283987, DDB_G0284669, DDB_G0284915, DDB_G0284947, DDB_G0285193, DDB_G0287985, DDB_G0288145, DDB_G0288333, DDB_G0288387, DDB_G0288777, DDB_G0288985, DDB_G0290121, DDB_G0290397, DDB_G0290401, DDB_G0292458, DDB_G02…
		GO:0009156	ribonucleoside monophosphate biosynthetic process	4.72798e-09	5.59524e-12	18	59	7.73777	DDB_G0268360, DDB_G0271564, DDB_G0274471, DDB_G0276241, DDB_G0276331, DDB_G0276335, DDB_G0276417, DDB_G0277087, DDB_G0280041, DDB_G0281551, DDB_G0283987, DDB_G0284669, DDB_G0285193, DDB_G0288145, DDB_G0288333, DDB_G0288985, DDB_G0290121, DDB_G0292994
		GO:0044281	small molecule metabolic process	5.42713e-09	6.42264e-12	66	680	2.46167	DDB_G0268360, DDB_G0269226, DDB_G0269756, DDB_G0270152, DDB_G0270806, DDB_G0271344, DDB_G0271564, DDB_G0271774, DDB_G0271842, DDB_G0272781, DDB_G0273131, DDB_G0274383, DDB_G0274471, DDB_G0275295, DDB_G0275311, DDB_G0275537, DDB_G0276067, DDB_G0276241, DDB_G0276331, DDB_G0276335, DDB_G0276417, DDB_G0277087, DDB_G0277725, DDB_G0277947, DDB_G0278095, DDB_G0278275, DDB_G0278341, DDB_G0278735, DDB_G02…
		GO:0046112	nucleobase biosynthetic process	6.07605e-09	7.19059e-12	10	14	18.1162	DDB_G0276331, DDB_G0276335, DDB_G0277725, DDB_G0280041, DDB_G0280567, DDB_G0285193, DDB_G0287985, DDB_G0288985, DDB_G0290121, DDB_G0290397
		GO:0072522	purine-containing compound biosynthetic process	7.41666e-09	8.77711e-12	21	85	6.26607	DDB_G0268360, DDB_G0271564, DDB_G0274471, DDB_G0276241, DDB_G0276417, DDB_G0277087, DDB_G0277725, DDB_G0278341, DDB_G0281551, DDB_G0283987, DDB_G0284669, DDB_G0285193, DDB_G0287985, DDB_G0288145, DDB_G0288333, DDB_G0288387, DDB_G0288985, DDB_G0290121, DDB_G0290397, DDB_G0290401, DDB_G0292994
		GO:0009123	nucleoside monophosphate metabolic process	8.93525e-09	1.05743e-11	23	104	5.60905	DDB_G0268360, DDB_G0271564, DDB_G0271774, DDB_G0274471, DDB_G0275537, DDB_G0276241, DDB_G0276331, DDB_G0276335, DDB_G0276417, DDB_G0277087, DDB_G0280041, DDB_G0281551, DDB_G0282615, DDB_G0283987, DDB_G0284669, DDB_G0284947, DDB_G0285193, DDB_G0288145, DDB_G0288333, DDB_G0288777, DDB_G0288985, DDB_G0290121, DDB_G0292994
		GO:0008152	metabolic process	9.59402e-09	1.13539e-11	241	4324	1.4136	DDB_G0267420, DDB_G0267730, DDB_G0267766, DDB_G0268360, DDB_G0268518, DDB_G0268876, DDB_G0268948, DDB_G0269226, DDB_G0269282, DDB_G0269658, DDB_G0269756, DDB_G0269762, DDB_G0269768, DDB_G0269790, DDB_G0269878, DDB_G0269972, DDB_G0270042, DDB_G0270152, DDB_G0270156, DDB_G0270196, DDB_G0270380, DDB_G0270482, DDB_G0270642, DDB_G0270806, DDB_G0270850, DDB_G0270958, DDB_G0270984, DDB_G0271272, DDB_G02…
		GO:0009165	nucleotide biosynthetic process	2.10697e-08	2.49345e-11	24	118	5.15851	DDB_G0268360, DDB_G0271564, DDB_G0274471, DDB_G0276241, DDB_G0276331, DDB_G0276335, DDB_G0276417, DDB_G0277087, DDB_G0277725, DDB_G0278341, DDB_G0280041, DDB_G0280567, DDB_G0281551, DDB_G0283987, DDB_G0284203, DDB_G0284669, DDB_G0285193, DDB_G0288145, DDB_G0288333, DDB_G0288387, DDB_G0288985, DDB_G0290121, DDB_G0290401, DDB_G0292994
		GO:0009124	nucleoside monophosphate biosynthetic process	2.91983e-08	3.45543e-11	18	65	7.02351	DDB_G0268360, DDB_G0271564, DDB_G0274471, DDB_G0276241, DDB_G0276331, DDB_G0276335, DDB_G0276417, DDB_G0277087, DDB_G0280041, DDB_G0281551, DDB_G0283987, DDB_G0284669, DDB_G0285193, DDB_G0288145, DDB_G0288333, DDB_G0288985, DDB_G0290121, DDB_G0292994
		GO:0034470	ncRNA processing	3.05793e-08	3.61885e-11	37	272	3.45007	DDB_G0269878, DDB_G0269972, DDB_G0270156, DDB_G0272442, DDB_G0273051, DDB_G0273449, DDB_G0274521, DDB_G0276411, DDB_G0276815, DDB_G0277019, DDB_G0278331, DDB_G0279013, DDB_G0279083, DDB_G0279371, DDB_G0279903, DDB_G0280407, DDB_G0280489, DDB_G0281685, DDB_G0281711, DDB_G0281839, DDB_G0282243, DDB_G0284093, DDB_G0284621, DDB_G0284817, DDB_G0285597, DDB_G0287537, DDB_G0287891, DDB_G0288347, DDB_G02…
		GO:1901293	nucleoside phosphate biosynthetic process	3.68608e-08	4.36222e-11	24	121	5.03061	DDB_G0268360, DDB_G0271564, DDB_G0274471, DDB_G0276241, DDB_G0276331, DDB_G0276335, DDB_G0276417, DDB_G0277087, DDB_G0277725, DDB_G0278341, DDB_G0280041, DDB_G0280567, DDB_G0281551, DDB_G0283987, DDB_G0284203, DDB_G0284669, DDB_G0285193, DDB_G0288145, DDB_G0288333, DDB_G0288387, DDB_G0288985, DDB_G0290121, DDB_G0290401, DDB_G0292994
		GO:0006163	purine nucleotide metabolic process	4.42091e-08	5.23185e-11	26	143	4.6114	DDB_G0268360, DDB_G0271564, DDB_G0271774, DDB_G0274383, DDB_G0274471, DDB_G0275537, DDB_G0276241, DDB_G0276417, DDB_G0277087, DDB_G0277725, DDB_G0278341, DDB_G0281551, DDB_G0282615, DDB_G0283987, DDB_G0284669, DDB_G0284947, DDB_G0285193, DDB_G0288145, DDB_G0288333, DDB_G0288387, DDB_G0288777, DDB_G0288985, DDB_G0290121, DDB_G0290401, DDB_G0292458, DDB_G0292994
		GO:0042273	ribosomal large subunit biogenesis	5.14047e-08	6.0834e-11	17	59	7.30789	DDB_G0269344, DDB_G0269642, DDB_G0269688, DDB_G0274521, DDB_G0276411, DDB_G0279205, DDB_G0279903, DDB_G0281839, DDB_G0282243, DDB_G0284383, DDB_G0284817, DDB_G0287937, DDB_G0288295, DDB_G0288659, DDB_G0289415, DDB_G0289699, DDB_G0295765
		GO:0006164	purine nucleotide biosynthetic process	1.22065e-07	1.44456e-10	19	79	6.09989	DDB_G0268360, DDB_G0271564, DDB_G0274471, DDB_G0276241, DDB_G0276417, DDB_G0277087, DDB_G0277725, DDB_G0278341, DDB_G0281551, DDB_G0283987, DDB_G0284669, DDB_G0285193, DDB_G0288145, DDB_G0288333, DDB_G0288387, DDB_G0288985, DDB_G0290121, DDB_G0290401, DDB_G0292994
		GO:0009150	purine ribonucleotide metabolic process	2.0958e-07	2.48024e-10	24	131	4.6466	DDB_G0268360, DDB_G0271564, DDB_G0271774, DDB_G0274383, DDB_G0274471, DDB_G0275537, DDB_G0276241, DDB_G0276417, DDB_G0277087, DDB_G0278341, DDB_G0281551, DDB_G0282615, DDB_G0283987, DDB_G0284947, DDB_G0285193, DDB_G0288145, DDB_G0288333, DDB_G0288387, DDB_G0288777, DDB_G0288985, DDB_G0290121, DDB_G0290401, DDB_G0292458, DDB_G0292994
		GO:0034641	cellular nitrogen compound metabolic process	2.86069e-07	3.38543e-10	141	2192	1.63145	DDB_G0267766, DDB_G0268360, DDB_G0268518, DDB_G0269762, DDB_G0269878, DDB_G0269972, DDB_G0270042, DDB_G0270152, DDB_G0270156, DDB_G0270380, DDB_G0270482, DDB_G0270642, DDB_G0270850, DDB_G0270958, DDB_G0270984, DDB_G0271272, DDB_G0271564, DDB_G0271774, DDB_G0272076, DDB_G0272308, DDB_G0272374, DDB_G0272442, DDB_G0272754, DDB_G0272781, DDB_G0273003, DDB_G0273051, DDB_G0273131, DDB_G0273191, DDB_G02…
		GO:0009167	purine ribonucleoside monophosphate metabolic process	3.79884e-07	4.49566e-10	19	84	5.7368	DDB_G0268360, DDB_G0271564, DDB_G0271774, DDB_G0274471, DDB_G0275537, DDB_G0276241, DDB_G0276417, DDB_G0277087, DDB_G0281551, DDB_G0282615, DDB_G0283987, DDB_G0284947, DDB_G0285193, DDB_G0288145, DDB_G0288333, DDB_G0288777, DDB_G0288985, DDB_G0290121, DDB_G0292994
		GO:0009126	purine nucleoside monophosphate metabolic process	4.71651e-07	5.58167e-10	19	85	5.66931	DDB_G0268360, DDB_G0271564, DDB_G0271774, DDB_G0274471, DDB_G0275537, DDB_G0276241, DDB_G0276417, DDB_G0277087, DDB_G0281551, DDB_G0282615, DDB_G0283987, DDB_G0284947, DDB_G0285193, DDB_G0288145, DDB_G0288333, DDB_G0288777, DDB_G0288985, DDB_G0290121, DDB_G0292994
		GO:0034660	ncRNA metabolic process	4.83144e-07	5.71768e-10	39	327	3.02491	DDB_G0269878, DDB_G0269972, DDB_G0270152, DDB_G0270156, DDB_G0272442, DDB_G0273051, DDB_G0273449, DDB_G0274521, DDB_G0276411, DDB_G0276815, DDB_G0277019, DDB_G0278331, DDB_G0279013, DDB_G0279083, DDB_G0279371, DDB_G0279903, DDB_G0280407, DDB_G0280489, DDB_G0281685, DDB_G0281711, DDB_G0281839, DDB_G0282243, DDB_G0284093, DDB_G0284621, DDB_G0284817, DDB_G0285597, DDB_G0287537, DDB_G0287891, DDB_G02…
		GO:0009152	purine ribonucleotide biosynthetic process	5.993e-07	7.09231e-10	17	68	6.34067	DDB_G0268360, DDB_G0271564, DDB_G0274471, DDB_G0276241, DDB_G0276417, DDB_G0277087, DDB_G0278341, DDB_G0281551, DDB_G0283987, DDB_G0285193, DDB_G0288145, DDB_G0288333, DDB_G0288387, DDB_G0288985, DDB_G0290121, DDB_G0290401, DDB_G0292994
		GO:0019637	organophosphate metabolic process	8.31712e-07	9.84275e-10	41	362	2.87257	DDB_G0268360, DDB_G0271564, DDB_G0271774, DDB_G0273131, DDB_G0274383, DDB_G0274471, DDB_G0275537, DDB_G0276241, DDB_G0276331, DDB_G0276335, DDB_G0276417, DDB_G0277087, DDB_G0277455, DDB_G0277537, DDB_G0277725, DDB_G0278275, DDB_G0278341, DDB_G0278735, DDB_G0280041, DDB_G0280567, DDB_G0281239, DDB_G0281551, DDB_G0282615, DDB_G0283987, DDB_G0284203, DDB_G0284669, DDB_G0284947, DDB_G0285193, DDB_G02…
		GO:0009112	nucleobase metabolic process	1.21932e-06	1.44299e-09	11	26	10.7304	DDB_G0276331, DDB_G0276335, DDB_G0277725, DDB_G0280041, DDB_G0280567, DDB_G0283987, DDB_G0285193, DDB_G0287985, DDB_G0288985, DDB_G0290121, DDB_G0290397
		GO:1901135	carbohydrate derivative metabolic process	1.85705e-06	2.1977e-09	38	328	2.93836	DDB_G0268360, DDB_G0271564, DDB_G0271774, DDB_G0272170, DDB_G0272781, DDB_G0273131, DDB_G0274383, DDB_G0274471, DDB_G0275121, DDB_G0275537, DDB_G0275917, DDB_G0276241, DDB_G0276331, DDB_G0276335, DDB_G0276417, DDB_G0277087, DDB_G0278275, DDB_G0278341, DDB_G0280041, DDB_G0280567, DDB_G0281551, DDB_G0282615, DDB_G0283987, DDB_G0284669, DDB_G0284915, DDB_G0284947, DDB_G0285193, DDB_G0287985, DDB_G02…
		GO:1901566	organonitrogen compound biosynthetic process	2.46202e-06	2.91363e-09	80	1037	1.95662	DDB_G0267766, DDB_G0268360, DDB_G0268518, DDB_G0269762, DDB_G0270152, DDB_G0270380, DDB_G0270482, DDB_G0270984, DDB_G0271564, DDB_G0272076, DDB_G0272170, DDB_G0272308, DDB_G0272781, DDB_G0273191, DDB_G0273449, DDB_G0274407, DDB_G0274471, DDB_G0276067, DDB_G0276115, DDB_G0276241, DDB_G0276331, DDB_G0276335, DDB_G0276417, DDB_G0277087, DDB_G0277195, DDB_G0277635, DDB_G0277725, DDB_G0277947, DDB_G02…
		GO:1901360	organic cyclic compound metabolic process	3.19697e-06	3.78339e-09	108	1585	1.72818	DDB_G0268360, DDB_G0269226, DDB_G0269878, DDB_G0269972, DDB_G0270042, DDB_G0270152, DDB_G0270156, DDB_G0270642, DDB_G0270850, DDB_G0270958, DDB_G0271272, DDB_G0271564, DDB_G0271774, DDB_G0272374, DDB_G0272442, DDB_G0272781, DDB_G0273003, DDB_G0273051, DDB_G0273131, DDB_G0273449, DDB_G0274383, DDB_G0274471, DDB_G0274521, DDB_G0275537, DDB_G0275845, DDB_G0276241, DDB_G0276331, DDB_G0276335, DDB_G02…
		GO:0055114	oxidation-reduction process	3.34978e-06	3.96424e-09	54	585	2.34117	DDB_G0267420, DDB_G0269756, DDB_G0270806, DDB_G0271344, DDB_G0271774, DDB_G0271842, DDB_G0272440, DDB_G0272466, DDB_G0272754, DDB_G0273105, DDB_G0273131, DDB_G0274105, DDB_G0275069, DDB_G0275311, DDB_G0275537, DDB_G0276331, DDB_G0276417, DDB_G0277203, DDB_G0277349, DDB_G0277725, DDB_G0277837, DDB_G0278095, DDB_G0279137, DDB_G0279437, DDB_G0279827, DDB_G0279973, DDB_G0280997, DDB_G0281071, DDB_G02…
		GO:0009168	purine ribonucleoside monophosphate biosynthetic process	3.90403e-06	4.62015e-09	14	50	7.10155	DDB_G0268360, DDB_G0271564, DDB_G0274471, DDB_G0276241, DDB_G0276417, DDB_G0277087, DDB_G0281551, DDB_G0283987, DDB_G0285193, DDB_G0288145, DDB_G0288333, DDB_G0288985, DDB_G0290121, DDB_G0292994
		GO:0006188	IMP biosynthetic process	4.02986e-06	4.76906e-09	7	9	19.7265	DDB_G0277087, DDB_G0283987, DDB_G0285193, DDB_G0288145, DDB_G0288333, DDB_G0288985, DDB_G0290121
		GO:0044283	small molecule biosynthetic process	4.15934e-06	4.9223e-09	30	226	3.36673	DDB_G0269226, DDB_G0271564, DDB_G0274383, DDB_G0274471, DDB_G0276067, DDB_G0276331, DDB_G0276335, DDB_G0276417, DDB_G0277947, DDB_G0278095, DDB_G0278341, DDB_G0278735, DDB_G0279095, DDB_G0279137, DDB_G0279211, DDB_G0280041, DDB_G0280567, DDB_G0281071, DDB_G0281239, DDB_G0281551, DDB_G0284203, DDB_G0284915, DDB_G0285193, DDB_G0288299, DDB_G0288387, DDB_G0288481, DDB_G0290397, DDB_G0291648, DDB_G02…
		GO:0046483	heterocycle metabolic process	4.91458e-06	5.81608e-09	105	1537	1.73265	DDB_G0268360, DDB_G0269878, DDB_G0269972, DDB_G0270042, DDB_G0270152, DDB_G0270156, DDB_G0270642, DDB_G0270850, DDB_G0270958, DDB_G0271272, DDB_G0271564, DDB_G0271774, DDB_G0272374, DDB_G0272442, DDB_G0272781, DDB_G0273003, DDB_G0273051, DDB_G0273131, DDB_G0273449, DDB_G0274383, DDB_G0274471, DDB_G0274521, DDB_G0275537, DDB_G0275845, DDB_G0276241, DDB_G0276331, DDB_G0276335, DDB_G0276411, DDB_G02…
		GO:0071704	organic substance metabolic process	4.99839e-06	5.91525e-09	212	3883	1.38473	DDB_G0267730, DDB_G0267766, DDB_G0268360, DDB_G0268518, DDB_G0268876, DDB_G0269226, DDB_G0269282, DDB_G0269658, DDB_G0269756, DDB_G0269762, DDB_G0269768, DDB_G0269790, DDB_G0269878, DDB_G0269972, DDB_G0270042, DDB_G0270152, DDB_G0270156, DDB_G0270196, DDB_G0270380, DDB_G0270482, DDB_G0270642, DDB_G0270806, DDB_G0270850, DDB_G0270958, DDB_G0270984, DDB_G0271272, DDB_G0271344, DDB_G0271506, DDB_G02…
		GO:0009127	purine nucleoside monophosphate biosynthetic process	5.18949e-06	6.14141e-09	14	51	6.96231	DDB_G0268360, DDB_G0271564, DDB_G0274471, DDB_G0276241, DDB_G0276417, DDB_G0277087, DDB_G0281551, DDB_G0283987, DDB_G0285193, DDB_G0288145, DDB_G0288333, DDB_G0288985, DDB_G0290121, DDB_G0292994
		GO:0006725	cellular aromatic compound metabolic process	9.58267e-06	1.13404e-08	105	1556	1.71149	DDB_G0268360, DDB_G0269878, DDB_G0269972, DDB_G0270042, DDB_G0270152, DDB_G0270156, DDB_G0270642, DDB_G0270850, DDB_G0270958, DDB_G0271272, DDB_G0271564, DDB_G0271774, DDB_G0272374, DDB_G0272442, DDB_G0272781, DDB_G0273003, DDB_G0273051, DDB_G0273131, DDB_G0273449, DDB_G0274383, DDB_G0274471, DDB_G0274521, DDB_G0275537, DDB_G0275845, DDB_G0276241, DDB_G0276331, DDB_G0276335, DDB_G0276411, DDB_G02…
		GO:0006732	coenzyme metabolic process	9.93751e-06	1.17604e-08	22	134	4.16402	DDB_G0271564, DDB_G0273131, DDB_G0274471, DDB_G0276417, DDB_G0277725, DDB_G0277947, DDB_G0278275, DDB_G0278341, DDB_G0279095, DDB_G0279137, DDB_G0284203, DDB_G0284915, DDB_G0288299, DDB_G0288387, DDB_G0288481, DDB_G0290397, DDB_G0290401, DDB_G0291179, DDB_G0291652, DDB_G0292458, DDB_G0292898, DDB_G0292994
		GO:0046040	IMP metabolic process	1.29764e-05	1.53567e-08	7	10	17.7539	DDB_G0277087, DDB_G0283987, DDB_G0285193, DDB_G0288145, DDB_G0288333, DDB_G0288985, DDB_G0290121
		GO:0044237	cellular metabolic process	1.6169e-05	1.91349e-08	204	3745	1.38157	DDB_G0267420, DDB_G0267730, DDB_G0267766, DDB_G0268360, DDB_G0268518, DDB_G0268876, DDB_G0269282, DDB_G0269658, DDB_G0269756, DDB_G0269762, DDB_G0269768, DDB_G0269878, DDB_G0269972, DDB_G0270042, DDB_G0270152, DDB_G0270156, DDB_G0270196, DDB_G0270380, DDB_G0270482, DDB_G0270642, DDB_G0270806, DDB_G0270850, DDB_G0270958, DDB_G0270984, DDB_G0271272, DDB_G0271344, DDB_G0271564, DDB_G0271774, DDB_G02…
		GO:0006189	'de novo' IMP biosynthetic process	2.08384e-05	2.46609e-08	6	7	21.7394	DDB_G0277087, DDB_G0283987, DDB_G0288145, DDB_G0288333, DDB_G0288985, DDB_G0290121
		GO:0044238	primary metabolic process	2.66664e-05	3.15579e-08	200	3673	1.38103	DDB_G0267730, DDB_G0267766, DDB_G0268360, DDB_G0268518, DDB_G0268876, DDB_G0269226, DDB_G0269282, DDB_G0269658, DDB_G0269756, DDB_G0269762, DDB_G0269768, DDB_G0269790, DDB_G0269878, DDB_G0269972, DDB_G0270042, DDB_G0270152, DDB_G0270156, DDB_G0270196, DDB_G0270380, DDB_G0270482, DDB_G0270642, DDB_G0270850, DDB_G0270958, DDB_G0270984, DDB_G0271272, DDB_G0271344, DDB_G0271506, DDB_G0271564, DDB_G02…
		GO:0016053	organic acid biosynthetic process	4.10817e-05	4.86174e-08	20	121	4.19218	DDB_G0271564, DDB_G0274471, DDB_G0276067, DDB_G0276335, DDB_G0276417, DDB_G0277947, DDB_G0278095, DDB_G0278341, DDB_G0279095, DDB_G0279137, DDB_G0279211, DDB_G0281071, DDB_G0284203, DDB_G0284915, DDB_G0288387, DDB_G0288481, DDB_G0290397, DDB_G0291648, DDB_G0291652, DDB_G0292994
		GO:0046394	carboxylic acid biosynthetic process	4.10817e-05	4.86174e-08	20	121	4.19218	DDB_G0271564, DDB_G0274471, DDB_G0276067, DDB_G0276335, DDB_G0276417, DDB_G0277947, DDB_G0278095, DDB_G0278341, DDB_G0279095, DDB_G0279137, DDB_G0279211, DDB_G0281071, DDB_G0284203, DDB_G0284915, DDB_G0288387, DDB_G0288481, DDB_G0290397, DDB_G0291648, DDB_G0291652, DDB_G0292994
		GO:0019752	carboxylic acid metabolic process	4.15299e-05	4.91478e-08	37	352	2.66596	DDB_G0269756, DDB_G0270152, DDB_G0270806, DDB_G0271344, DDB_G0271564, DDB_G0271842, DDB_G0274471, DDB_G0275311, DDB_G0276067, DDB_G0276335, DDB_G0276417, DDB_G0277725, DDB_G0277947, DDB_G0278095, DDB_G0278341, DDB_G0279095, DDB_G0279137, DDB_G0279211, DDB_G0280567, DDB_G0281071, DDB_G0281551, DDB_G0282615, DDB_G0284203, DDB_G0284915, DDB_G0287255, DDB_G0288145, DDB_G0288299, DDB_G0288387, DDB_G02…
		GO:0006139	nucleobase-containing compound metabolic process	4.59105e-05	5.4332e-08	99	1481	1.69541	DDB_G0268360, DDB_G0269878, DDB_G0269972, DDB_G0270042, DDB_G0270152, DDB_G0270156, DDB_G0270642, DDB_G0270850, DDB_G0270958, DDB_G0271272, DDB_G0271564, DDB_G0271774, DDB_G0272374, DDB_G0272442, DDB_G0272781, DDB_G0273003, DDB_G0273051, DDB_G0273131, DDB_G0273449, DDB_G0274383, DDB_G0274471, DDB_G0274521, DDB_G0275537, DDB_G0275845, DDB_G0276241, DDB_G0276331, DDB_G0276335, DDB_G0276411, DDB_G02…
		GO:0043436	oxoacid metabolic process	4.81425e-05	5.69734e-08	37	354	2.6509	DDB_G0269756, DDB_G0270152, DDB_G0270806, DDB_G0271344, DDB_G0271564, DDB_G0271842, DDB_G0274471, DDB_G0275311, DDB_G0276067, DDB_G0276335, DDB_G0276417, DDB_G0277725, DDB_G0277947, DDB_G0278095, DDB_G0278341, DDB_G0279095, DDB_G0279137, DDB_G0279211, DDB_G0280567, DDB_G0281071, DDB_G0281551, DDB_G0282615, DDB_G0284203, DDB_G0284915, DDB_G0287255, DDB_G0288145, DDB_G0288299, DDB_G0288387, DDB_G02…
		GO:0017144	drug metabolic process	8.82491e-05	1.04437e-07	27	216	3.17034	DDB_G0268360, DDB_G0271344, DDB_G0271564, DDB_G0271774, DDB_G0271842, DDB_G0274471, DDB_G0275311, DDB_G0275537, DDB_G0276241, DDB_G0276417, DDB_G0277947, DDB_G0279095, DDB_G0282615, DDB_G0284203, DDB_G0284535, DDB_G0284915, DDB_G0284947, DDB_G0285741, DDB_G0287255, DDB_G0288299, DDB_G0288333, DDB_G0288481, DDB_G0288777, DDB_G0291179, DDB_G0291648, DDB_G0291652, DDB_G0292994
		GO:0006082	organic acid metabolic process	0.00010158	1.20213e-07	38	380	2.53627	DDB_G0269756, DDB_G0270152, DDB_G0270806, DDB_G0271344, DDB_G0271564, DDB_G0271842, DDB_G0274471, DDB_G0275311, DDB_G0276067, DDB_G0276335, DDB_G0276417, DDB_G0277725, DDB_G0277947, DDB_G0278095, DDB_G0278341, DDB_G0279095, DDB_G0279137, DDB_G0279211, DDB_G0280567, DDB_G0281071, DDB_G0281551, DDB_G0282615, DDB_G0284203, DDB_G0284535, DDB_G0284915, DDB_G0287255, DDB_G0288145, DDB_G0288299, DDB_G02…
		GO:0051186	cofactor metabolic process	0.000131622	1.55766e-07	25	193	3.28532	DDB_G0271564, DDB_G0272754, DDB_G0273131, DDB_G0274471, DDB_G0276417, DDB_G0277725, DDB_G0277947, DDB_G0278275, DDB_G0278341, DDB_G0279095, DDB_G0279137, DDB_G0284203, DDB_G0284915, DDB_G0285741, DDB_G0288299, DDB_G0288387, DDB_G0288481, DDB_G0290397, DDB_G0290401, DDB_G0291179, DDB_G0291652, DDB_G0292458, DDB_G0292898, DDB_G0292994, DDB_G0293122
		GO:0000462	maturation of SSU-rRNA from tricistronic rRNA transcript (SSU-rRNA, 5.8S rRNA, LSU-rRNA)	0.000139102	1.64618e-07	9	24	9.51101	DDB_G0269972, DDB_G0274521, DDB_G0276815, DDB_G0278331, DDB_G0280489, DDB_G0284093, DDB_G0284621, DDB_G0287891, DDB_G0292882
		GO:0090407	organophosphate biosynthetic process	0.0002049	2.42485e-07	27	225	3.04352	DDB_G0268360, DDB_G0271564, DDB_G0274471, DDB_G0276241, DDB_G0276331, DDB_G0276335, DDB_G0276417, DDB_G0277087, DDB_G0277725, DDB_G0278341, DDB_G0278735, DDB_G0280041, DDB_G0280567, DDB_G0281551, DDB_G0283987, DDB_G0284203, DDB_G0284669, DDB_G0285193, DDB_G0288145, DDB_G0288299, DDB_G0288333, DDB_G0288387, DDB_G0288481, DDB_G0288985, DDB_G0290121, DDB_G0290401, DDB_G0292994
		GO:0006091	generation of precursor metabolites and energy	0.00023291	2.75633e-07	20	134	3.78548	DDB_G0271344, DDB_G0271564, DDB_G0271774, DDB_G0271842, DDB_G0272754, DDB_G0274105, DDB_G0274471, DDB_G0275311, DDB_G0275537, DDB_G0276417, DDB_G0277837, DDB_G0282097, DDB_G0282615, DDB_G0284259, DDB_G0284947, DDB_G0285003, DDB_G0288777, DDB_G0291281, DDB_G0291648, DDB_G0292994
		GO:0044085	cellular component biogenesis	0.000232979	2.75714e-07	57	717	2.01628	DDB_G0268042, DDB_G0269344, DDB_G0269388, DDB_G0269642, DDB_G0269688, DDB_G0269878, DDB_G0269972, DDB_G0270042, DDB_G0270156, DDB_G0271292, DDB_G0272076, DDB_G0272374, DDB_G0273003, DDB_G0274521, DDB_G0275753, DDB_G0276411, DDB_G0276815, DDB_G0277019, DDB_G0277635, DDB_G0278331, DDB_G0278477, DDB_G0279013, DDB_G0279083, DDB_G0279205, DDB_G0279371, DDB_G0279903, DDB_G0280407, DDB_G0280489, DDB_G02…
		GO:0009113	purine nucleobase biosynthetic process	0.000233658	2.76518e-07	6	9	16.9085	DDB_G0277725, DDB_G0285193, DDB_G0287985, DDB_G0288985, DDB_G0290121, DDB_G0290397
		GO:0030490	maturation of SSU-rRNA	0.000285453	3.37814e-07	10	33	7.68566	DDB_G0269972, DDB_G0274521, DDB_G0276815, DDB_G0278331, DDB_G0280489, DDB_G0284093, DDB_G0284621, DDB_G0285597, DDB_G0287891, DDB_G0292882
		GO:0044272	sulfur compound biosynthetic process	0.000448534	5.30809e-07	9	27	8.45423	DDB_G0271564, DDB_G0276417, DDB_G0278341, DDB_G0279137, DDB_G0279211, DDB_G0284915, DDB_G0288387, DDB_G0291179, DDB_G0292994
		GO:1901137	carbohydrate derivative biosynthetic process	0.000454356	5.377e-07	24	192	3.17034	DDB_G0268360, DDB_G0271564, DDB_G0272170, DDB_G0272781, DDB_G0274471, DDB_G0276241, DDB_G0276331, DDB_G0276335, DDB_G0276417, DDB_G0277087, DDB_G0278341, DDB_G0280041, DDB_G0280567, DDB_G0281551, DDB_G0283987, DDB_G0284669, DDB_G0285193, DDB_G0288145, DDB_G0288333, DDB_G0288387, DDB_G0288985, DDB_G0290121, DDB_G0290401, DDB_G0292994
		GO:0006807	nitrogen compound metabolic process	0.000649357	7.6847e-07	183	3421	1.35673	DDB_G0267730, DDB_G0267766, DDB_G0268360, DDB_G0268518, DDB_G0268876, DDB_G0269282, DDB_G0269658, DDB_G0269756, DDB_G0269762, DDB_G0269768, DDB_G0269878, DDB_G0269972, DDB_G0270042, DDB_G0270152, DDB_G0270156, DDB_G0270196, DDB_G0270380, DDB_G0270482, DDB_G0270642, DDB_G0270850, DDB_G0270958, DDB_G0270984, DDB_G0271272, DDB_G0271506, DDB_G0271564, DDB_G0271774, DDB_G0271902, DDB_G0272076, DDB_G02…
		GO:0006760	folic acid-containing compound metabolic process	0.00100572	1.1902e-06	7	16	11.0962	DDB_G0277725, DDB_G0277947, DDB_G0279095, DDB_G0279137, DDB_G0288481, DDB_G0290397, DDB_G0291652
		GO:0046653	tetrahydrofolate metabolic process	0.00120093	1.42122e-06	6	11	13.8342	DDB_G0277725, DDB_G0277947, DDB_G0279137, DDB_G0288481, DDB_G0290397, DDB_G0291652
		GO:0071616	acyl-CoA biosynthetic process	0.00155102	1.83553e-06	5	7	18.1162	DDB_G0271564, DDB_G0276417, DDB_G0278341, DDB_G0288387, DDB_G0292994
		GO:0035384	thioester biosynthetic process	0.00155102	1.83553e-06	5	7	18.1162	DDB_G0271564, DDB_G0276417, DDB_G0278341, DDB_G0288387, DDB_G0292994
		GO:0042274	ribosomal small subunit biogenesis	0.00162242	1.92003e-06	11	48	5.81228	DDB_G0269972, DDB_G0274521, DDB_G0276815, DDB_G0277635, DDB_G0278331, DDB_G0280489, DDB_G0284093, DDB_G0284621, DDB_G0285597, DDB_G0287891, DDB_G0292882
		GO:0006144	purine nucleobase metabolic process	0.00261152	3.09056e-06	7	18	9.86327	DDB_G0277725, DDB_G0283987, DDB_G0285193, DDB_G0287985, DDB_G0288985, DDB_G0290121, DDB_G0290397
		GO:1901564	organonitrogen compound metabolic process	0.0028984	3.43006e-06	135	2397	1.42844	DDB_G0267730, DDB_G0267766, DDB_G0268360, DDB_G0268518, DDB_G0268876, DDB_G0269282, DDB_G0269658, DDB_G0269756, DDB_G0269762, DDB_G0269768, DDB_G0269878, DDB_G0270152, DDB_G0270196, DDB_G0270380, DDB_G0270482, DDB_G0270984, DDB_G0271506, DDB_G0271564, DDB_G0271774, DDB_G0271902, DDB_G0272076, DDB_G0272170, DDB_G0272308, DDB_G0272754, DDB_G0272781, DDB_G0272815, DDB_G0273131, DDB_G0273191, DDB_G02…
		GO:0006396	RNA processing	0.00372232	4.40511e-06	41	491	2.11786	DDB_G0269878, DDB_G0269972, DDB_G0270042, DDB_G0270156, DDB_G0272374, DDB_G0272442, DDB_G0273003, DDB_G0273051, DDB_G0273449, DDB_G0274521, DDB_G0276411, DDB_G0276815, DDB_G0277019, DDB_G0278331, DDB_G0279013, DDB_G0279083, DDB_G0279371, DDB_G0279903, DDB_G0280407, DDB_G0280489, DDB_G0281685, DDB_G0281711, DDB_G0281839, DDB_G0282243, DDB_G0284093, DDB_G0284621, DDB_G0284817, DDB_G0285597, DDB_G02…
		GO:0006575	cellular modified amino acid metabolic process	0.00414594	4.90643e-06	10	43	5.8983	DDB_G0272754, DDB_G0277725, DDB_G0277947, DDB_G0279095, DDB_G0279137, DDB_G0284915, DDB_G0288481, DDB_G0290397, DDB_G0291652, DDB_G0293122
		GO:0033866	nucleoside bisphosphate biosynthetic process	0.00416876	4.93344e-06	6	13	11.7059	DDB_G0271564, DDB_G0276417, DDB_G0278341, DDB_G0288387, DDB_G0290401, DDB_G0292994
		GO:0034030	ribonucleoside bisphosphate biosynthetic process	0.00416876	4.93344e-06	6	13	11.7059	DDB_G0271564, DDB_G0276417, DDB_G0278341, DDB_G0288387, DDB_G0290401, DDB_G0292994
		GO:0034033	purine nucleoside bisphosphate biosynthetic process	0.00416876	4.93344e-06	6	13	11.7059	DDB_G0271564, DDB_G0276417, DDB_G0278341, DDB_G0288387, DDB_G0290401, DDB_G0292994
		GO:0044271	cellular nitrogen compound biosynthetic process	0.00505682	5.9844e-06	82	1284	1.61974	DDB_G0267766, DDB_G0268360, DDB_G0268518, DDB_G0269762, DDB_G0270152, DDB_G0270380, DDB_G0270482, DDB_G0270984, DDB_G0271272, DDB_G0271564, DDB_G0272076, DDB_G0272308, DDB_G0272781, DDB_G0273191, DDB_G0273449, DDB_G0274383, DDB_G0274407, DDB_G0274471, DDB_G0276067, DDB_G0276115, DDB_G0276241, DDB_G0276331, DDB_G0276335, DDB_G0276417, DDB_G0277087, DDB_G0277195, DDB_G0277635, DDB_G0277725, DDB_G02…
		GO:0009987	cellular process	0.00508698	6.0201e-06	244	4997	1.23844	DDB_G0267420, DDB_G0267730, DDB_G0267766, DDB_G0268042, DDB_G0268360, DDB_G0268518, DDB_G0268876, DDB_G0269190, DDB_G0269212, DDB_G0269282, DDB_G0269388, DDB_G0269658, DDB_G0269688, DDB_G0269756, DDB_G0269762, DDB_G0269768, DDB_G0269878, DDB_G0269972, DDB_G0270042, DDB_G0270152, DDB_G0270156, DDB_G0270196, DDB_G0270380, DDB_G0270482, DDB_G0270642, DDB_G0270806, DDB_G0270850, DDB_G0270958, DDB_G02…
		GO:0043603	cellular amide metabolic process	0.0063647	7.53219e-06	57	796	1.81617	DDB_G0267766, DDB_G0268518, DDB_G0269762, DDB_G0270152, DDB_G0270380, DDB_G0270482, DDB_G0270984, DDB_G0271564, DDB_G0272076, DDB_G0272308, DDB_G0272754, DDB_G0273191, DDB_G0273449, DDB_G0274407, DDB_G0276115, DDB_G0276335, DDB_G0276417, DDB_G0277195, DDB_G0277635, DDB_G0277725, DDB_G0277947, DDB_G0278195, DDB_G0278341, DDB_G0279061, DDB_G0279095, DDB_G0279137, DDB_G0279387, DDB_G0279487, DDB_G02…
		GO:0034404	nucleobase-containing small molecule biosynthetic process	0.00669293	7.92062e-06	11	55	5.07254	DDB_G0271564, DDB_G0274383, DDB_G0274471, DDB_G0276331, DDB_G0276335, DDB_G0276417, DDB_G0280041, DDB_G0280567, DDB_G0281551, DDB_G0285193, DDB_G0292994
		GO:0042558	pteridine-containing compound metabolic process	0.0086067	1.01854e-05	7	21	8.45423	DDB_G0277725, DDB_G0277947, DDB_G0279095, DDB_G0279137, DDB_G0288481, DDB_G0290397, DDB_G0291652
		GO:0006790	sulfur compound metabolic process	0.00974914	1.15374e-05	13	79	4.17361	DDB_G0271564, DDB_G0272754, DDB_G0276417, DDB_G0278341, DDB_G0279137, DDB_G0279211, DDB_G0284915, DDB_G0288387, DDB_G0291179, DDB_G0292250, DDB_G0292458, DDB_G0292994, DDB_G0293122
		GO:0019856	pyrimidine nucleobase biosynthetic process	0.00977191	1.15644e-05	4	5	20.2901	DDB_G0276331, DDB_G0276335, DDB_G0280041, DDB_G0280567
		GO:0046084	adenine biosynthetic process	0.00977191	1.15644e-05	4	5	20.2901	DDB_G0285193, DDB_G0287985, DDB_G0288985, DDB_G0290121
		GO:0005975	carbohydrate metabolic process	0.0120639	1.42769e-05	20	172	2.94915	DDB_G0269790, DDB_G0271564, DDB_G0272781, DDB_G0273131, DDB_G0274105, DDB_G0274471, DDB_G0275295, DDB_G0275311, DDB_G0275917, DDB_G0276417, DDB_G0278275, DDB_G0281239, DDB_G0281313, DDB_G0282615, DDB_G0283473, DDB_G0284259, DDB_G0288289, DDB_G0292104, DDB_G0292898, DDB_G0292994
		GO:1901605	alpha-amino acid metabolic process	0.0139116	1.64635e-05	17	132	3.26641	DDB_G0269756, DDB_G0276067, DDB_G0276335, DDB_G0277947, DDB_G0279137, DDB_G0279211, DDB_G0280567, DDB_G0281071, DDB_G0281551, DDB_G0282615, DDB_G0284203, DDB_G0284915, DDB_G0287255, DDB_G0288145, DDB_G0291179, DDB_G0291648, DDB_G0291652
		GO:0006730	one-carbon metabolic process	0.0168591	1.99516e-05	5	10	12.6813	DDB_G0277725, DDB_G0277947, DDB_G0279137, DDB_G0291179, DDB_G0291652
		GO:0046083	adenine metabolic process	0.0283997	3.36091e-05	4	6	16.9085	DDB_G0285193, DDB_G0287985, DDB_G0288985, DDB_G0290121
		GO:0006085	acetyl-CoA biosynthetic process	0.0283997	3.36091e-05	4	6	16.9085	DDB_G0271564, DDB_G0276417, DDB_G0278341, DDB_G0292994
		GO:0042255	ribosome assembly	0.0307428	3.63821e-05	9	43	5.30847	DDB_G0274521, DDB_G0276411, DDB_G0277635, DDB_G0279205, DDB_G0285597, DDB_G0287937, DDB_G0288295, DDB_G0288659, DDB_G0295765
		GO:0000027	ribosomal large subunit assembly	0.0310154	3.67046e-05	7	25	7.10155	DDB_G0274521, DDB_G0276411, DDB_G0279205, DDB_G0287937, DDB_G0288295, DDB_G0288659, DDB_G0295765
		GO:0009108	coenzyme biosynthetic process	0.0320987	3.79866e-05	13	88	3.74676	DDB_G0271564, DDB_G0274471, DDB_G0276417, DDB_G0278341, DDB_G0279095, DDB_G0284203, DDB_G0288299, DDB_G0288387, DDB_G0288481, DDB_G0290397, DDB_G0290401, DDB_G0291179, DDB_G0292994
		GO:1901576	organic substance biosynthetic process	0.0376163	4.45164e-05	98	1697	1.46467	DDB_G0267766, DDB_G0268360, DDB_G0268518, DDB_G0269226, DDB_G0269762, DDB_G0270152, DDB_G0270380, DDB_G0270482, DDB_G0270984, DDB_G0271272, DDB_G0271564, DDB_G0272076, DDB_G0272170, DDB_G0272308, DDB_G0272781, DDB_G0273191, DDB_G0273449, DDB_G0274105, DDB_G0274383, DDB_G0274407, DDB_G0274471, DDB_G0276067, DDB_G0276115, DDB_G0276241, DDB_G0276331, DDB_G0276335, DDB_G0276417, DDB_G0277087, DDB_G02…
	Cellular component	GO:1990904	ribonucleoprotein complex	4.88664e-17	2.72997e-19	62	431	3.64846	DDB_G0269642, DDB_G0269762, DDB_G0269878, DDB_G0269972, DDB_G0270042, DDB_G0270156, DDB_G0270380, DDB_G0270436, DDB_G0270984, DDB_G0271240, DDB_G0272076, DDB_G0272308, DDB_G0272374, DDB_G0273003, DDB_G0273191, DDB_G0274407, DDB_G0274521, DDB_G0275027, DDB_G0276815, DDB_G0277019, DDB_G0277195, DDB_G0277635, DDB_G0278195, DDB_G0278331, DDB_G0279013, DDB_G0279061, DDB_G0279371, DDB_G0279387, DDB_G02…
		GO:0005730	nucleolus	1.02928e-16	5.75016e-19	41	196	5.30546	DDB_G0269642, DDB_G0269688, DDB_G0269878, DDB_G0269972, DDB_G0270156, DDB_G0271240, DDB_G0271272, DDB_G0274521, DDB_G0276411, DDB_G0276815, DDB_G0277019, DDB_G0278039, DDB_G0278263, DDB_G0278331, DDB_G0279013, DDB_G0279371, DDB_G0279903, DDB_G0280407, DDB_G0280489, DDB_G0281685, DDB_G0281711, DDB_G0281839, DDB_G0282243, DDB_G0282339, DDB_G0282623, DDB_G0284383, DDB_G0284621, DDB_G0284817, DDB_G02…
		GO:0005739	mitochondrion	1.6368e-16	9.14414e-19	68	521	3.31029	DDB_G0267454, DDB_G0268360, DDB_G0268518, DDB_G0269470, DDB_G0269756, DDB_G0269762, DDB_G0270152, DDB_G0270196, DDB_G0270482, DDB_G0270806, DDB_G0271344, DDB_G0271506, DDB_G0271564, DDB_G0271774, DDB_G0271842, DDB_G0272476, DDB_G0272754, DDB_G0275311, DDB_G0275389, DDB_G0275537, DDB_G0276039, DDB_G0276241, DDB_G0276417, DDB_G0277195, DDB_G0277327, DDB_G0277837, DDB_G0278095, DDB_G0278195, DDB_G02…
		GO:0044424	intracellular part	5.59132e-16	3.12364e-18	254	4144	1.55457	DDB_G0267420, DDB_G0267454, DDB_G0267730, DDB_G0267768, DDB_G0268042, DDB_G0268138, DDB_G0268360, DDB_G0268518, DDB_G0268948, DDB_G0269190, DDB_G0269226, DDB_G0269282, DDB_G0269388, DDB_G0269470, DDB_G0269642, DDB_G0269688, DDB_G0269756, DDB_G0269762, DDB_G0269860, DDB_G0269878, DDB_G0269972, DDB_G0270018, DDB_G0270042, DDB_G0270152, DDB_G0270156, DDB_G0270196, DDB_G0270204, DDB_G0270380, DDB_G02…
		GO:0005623	cell	1.87312e-15	1.04644e-17	270	4560	1.50174	DDB_G0267420, DDB_G0267454, DDB_G0267730, DDB_G0267766, DDB_G0267768, DDB_G0268042, DDB_G0268138, DDB_G0268360, DDB_G0268518, DDB_G0268810, DDB_G0268948, DDB_G0269190, DDB_G0269212, DDB_G0269226, DDB_G0269282, DDB_G0269388, DDB_G0269470, DDB_G0269642, DDB_G0269688, DDB_G0269756, DDB_G0269762, DDB_G0269860, DDB_G0269878, DDB_G0269972, DDB_G0270018, DDB_G0270042, DDB_G0270152, DDB_G0270156, DDB_G02…
		GO:0043229	intracellular organelle	4.07952e-15	2.27906e-17	216	3333	1.64367	DDB_G0267420, DDB_G0267454, DDB_G0267768, DDB_G0268042, DDB_G0268138, DDB_G0268360, DDB_G0268518, DDB_G0268948, DDB_G0269190, DDB_G0269226, DDB_G0269388, DDB_G0269470, DDB_G0269642, DDB_G0269688, DDB_G0269756, DDB_G0269762, DDB_G0269860, DDB_G0269878, DDB_G0269972, DDB_G0270018, DDB_G0270042, DDB_G0270152, DDB_G0270156, DDB_G0270196, DDB_G0270204, DDB_G0270380, DDB_G0270482, DDB_G0270806, DDB_G02…
		GO:0043226	organelle	4.55932e-15	2.54711e-17	216	3336	1.64219	DDB_G0267420, DDB_G0267454, DDB_G0267768, DDB_G0268042, DDB_G0268138, DDB_G0268360, DDB_G0268518, DDB_G0268948, DDB_G0269190, DDB_G0269226, DDB_G0269388, DDB_G0269470, DDB_G0269642, DDB_G0269688, DDB_G0269756, DDB_G0269762, DDB_G0269860, DDB_G0269878, DDB_G0269972, DDB_G0270018, DDB_G0270042, DDB_G0270152, DDB_G0270156, DDB_G0270196, DDB_G0270204, DDB_G0270380, DDB_G0270482, DDB_G0270806, DDB_G02…
		GO:0044464	cell part	5.86418e-15	3.27608e-17	267	4522	1.49753	DDB_G0267420, DDB_G0267454, DDB_G0267730, DDB_G0267766, DDB_G0267768, DDB_G0268042, DDB_G0268138, DDB_G0268360, DDB_G0268518, DDB_G0268810, DDB_G0268948, DDB_G0269190, DDB_G0269212, DDB_G0269226, DDB_G0269282, DDB_G0269388, DDB_G0269470, DDB_G0269642, DDB_G0269688, DDB_G0269756, DDB_G0269762, DDB_G0269860, DDB_G0269878, DDB_G0269972, DDB_G0270018, DDB_G0270042, DDB_G0270152, DDB_G0270156, DDB_G02…
		GO:0044444	cytoplasmic part	2.38369e-14	1.33167e-16	165	2295	1.82346	DDB_G0267420, DDB_G0267454, DDB_G0268042, DDB_G0268138, DDB_G0268360, DDB_G0268518, DDB_G0268948, DDB_G0269190, DDB_G0269282, DDB_G0269388, DDB_G0269470, DDB_G0269756, DDB_G0269762, DDB_G0269860, DDB_G0270152, DDB_G0270196, DDB_G0270204, DDB_G0270380, DDB_G0270436, DDB_G0270482, DDB_G0270806, DDB_G0270984, DDB_G0271344, DDB_G0271506, DDB_G0271564, DDB_G0271774, DDB_G0271842, DDB_G0272076, DDB_G02…
		GO:0005622	intracellular	1.26422e-13	7.0627e-16	256	4353	1.49158	DDB_G0267420, DDB_G0267454, DDB_G0267730, DDB_G0267766, DDB_G0267768, DDB_G0268042, DDB_G0268138, DDB_G0268360, DDB_G0268518, DDB_G0268948, DDB_G0269190, DDB_G0269226, DDB_G0269282, DDB_G0269388, DDB_G0269470, DDB_G0269642, DDB_G0269688, DDB_G0269756, DDB_G0269762, DDB_G0269860, DDB_G0269878, DDB_G0269972, DDB_G0270018, DDB_G0270042, DDB_G0270152, DDB_G0270156, DDB_G0270196, DDB_G0270204, DDB_G02…
		GO:0030684	preribosome	2.10756e-12	1.17741e-14	22	70	7.97113	DDB_G0269642, DDB_G0269878, DDB_G0269972, DDB_G0271240, DDB_G0274521, DDB_G0276815, DDB_G0277019, DDB_G0278331, DDB_G0279371, DDB_G0279903, DDB_G0280489, DDB_G0281839, DDB_G0282243, DDB_G0282623, DDB_G0284383, DDB_G0284621, DDB_G0284817, DDB_G0286941, DDB_G0287537, DDB_G0287891, DDB_G0289415, DDB_G0290031
		GO:0043233	organelle lumen	2.4166e-12	1.35006e-14	70	657	2.70226	DDB_G0269642, DDB_G0269688, DDB_G0269762, DDB_G0269878, DDB_G0269972, DDB_G0270152, DDB_G0270156, DDB_G0271240, DDB_G0271272, DDB_G0274521, DDB_G0275121, DDB_G0275311, DDB_G0275537, DDB_G0276411, DDB_G0276417, DDB_G0276815, DDB_G0277019, DDB_G0278039, DDB_G0278195, DDB_G0278263, DDB_G0278331, DDB_G0279013, DDB_G0279371, DDB_G0279527, DDB_G0279903, DDB_G0280407, DDB_G0280489, DDB_G0281685, DDB_G02…
		GO:0031974	membrane-enclosed lumen	2.4166e-12	1.35006e-14	70	657	2.70226	DDB_G0269642, DDB_G0269688, DDB_G0269762, DDB_G0269878, DDB_G0269972, DDB_G0270152, DDB_G0270156, DDB_G0271240, DDB_G0271272, DDB_G0274521, DDB_G0275121, DDB_G0275311, DDB_G0275537, DDB_G0276411, DDB_G0276417, DDB_G0276815, DDB_G0277019, DDB_G0278039, DDB_G0278195, DDB_G0278263, DDB_G0278331, DDB_G0279013, DDB_G0279371, DDB_G0279527, DDB_G0279903, DDB_G0280407, DDB_G0280489, DDB_G0281685, DDB_G02…
		GO:0070013	intracellular organelle lumen	2.4166e-12	1.35006e-14	70	657	2.70226	DDB_G0269642, DDB_G0269688, DDB_G0269762, DDB_G0269878, DDB_G0269972, DDB_G0270152, DDB_G0270156, DDB_G0271240, DDB_G0271272, DDB_G0274521, DDB_G0275121, DDB_G0275311, DDB_G0275537, DDB_G0276411, DDB_G0276417, DDB_G0276815, DDB_G0277019, DDB_G0278039, DDB_G0278195, DDB_G0278263, DDB_G0278331, DDB_G0279013, DDB_G0279371, DDB_G0279527, DDB_G0279903, DDB_G0280407, DDB_G0280489, DDB_G0281685, DDB_G02…
		GO:0005737	cytoplasm	2.54691e-12	1.42286e-14	194	3028	1.62495	DDB_G0267420, DDB_G0267454, DDB_G0267730, DDB_G0268042, DDB_G0268138, DDB_G0268360, DDB_G0268518, DDB_G0268948, DDB_G0269190, DDB_G0269282, DDB_G0269388, DDB_G0269470, DDB_G0269756, DDB_G0269762, DDB_G0269860, DDB_G0270152, DDB_G0270196, DDB_G0270204, DDB_G0270380, DDB_G0270436, DDB_G0270482, DDB_G0270806, DDB_G0270984, DDB_G0271344, DDB_G0271506, DDB_G0271564, DDB_G0271774, DDB_G0271842, DDB_G02…
		GO:0043227	membrane-bounded organelle	3.36418e-11	1.87943e-13	191	3038	1.59456	DDB_G0267420, DDB_G0267454, DDB_G0267768, DDB_G0268042, DDB_G0268138, DDB_G0268360, DDB_G0268518, DDB_G0268948, DDB_G0269190, DDB_G0269470, DDB_G0269642, DDB_G0269688, DDB_G0269756, DDB_G0269762, DDB_G0269860, DDB_G0269878, DDB_G0269972, DDB_G0270042, DDB_G0270152, DDB_G0270156, DDB_G0270196, DDB_G0270204, DDB_G0270482, DDB_G0270806, DDB_G0271240, DDB_G0271272, DDB_G0271292, DDB_G0271344, DDB_G02…
		GO:0005840	ribosome	5.51349e-10	3.08016e-12	29	158	4.65518	DDB_G0269762, DDB_G0270380, DDB_G0270984, DDB_G0272308, DDB_G0273191, DDB_G0274407, DDB_G0277195, DDB_G0277635, DDB_G0278195, DDB_G0279061, DDB_G0279387, DDB_G0279527, DDB_G0279855, DDB_G0280287, DDB_G0281093, DDB_G0281699, DDB_G0283861, DDB_G0284093, DDB_G0285597, DDB_G0286389, DDB_G0288295, DDB_G0288983, DDB_G0289699, DDB_G0290299, DDB_G0290311, DDB_G0290315, DDB_G0292286, DDB_G0292882, DDB_G03…
		GO:0043232	intracellular non-membrane-bounded organelle	1.29829e-09	7.25302e-12	80	917	2.21267	DDB_G0269226, DDB_G0269388, DDB_G0269642, DDB_G0269688, DDB_G0269762, DDB_G0269878, DDB_G0269972, DDB_G0270018, DDB_G0270156, DDB_G0270380, DDB_G0270984, DDB_G0271240, DDB_G0271272, DDB_G0272308, DDB_G0273191, DDB_G0274407, DDB_G0274521, DDB_G0276411, DDB_G0276815, DDB_G0277019, DDB_G0277195, DDB_G0277257, DDB_G0277635, DDB_G0278039, DDB_G0278195, DDB_G0278263, DDB_G0278331, DDB_G0279013, DDB_G02…
		GO:0043228	non-membrane-bounded organelle	1.29829e-09	7.25302e-12	80	917	2.21267	DDB_G0269226, DDB_G0269388, DDB_G0269642, DDB_G0269688, DDB_G0269762, DDB_G0269878, DDB_G0269972, DDB_G0270018, DDB_G0270156, DDB_G0270380, DDB_G0270984, DDB_G0271240, DDB_G0271272, DDB_G0272308, DDB_G0273191, DDB_G0274407, DDB_G0274521, DDB_G0276411, DDB_G0276815, DDB_G0277019, DDB_G0277195, DDB_G0277257, DDB_G0277635, DDB_G0278039, DDB_G0278195, DDB_G0278263, DDB_G0278331, DDB_G0279013, DDB_G02…
		GO:0044452	nucleolar part	6.79774e-09	3.79762e-11	16	50	8.11606	DDB_G0269878, DDB_G0271240, DDB_G0277019, DDB_G0278039, DDB_G0278263, DDB_G0279013, DDB_G0279903, DDB_G0281839, DDB_G0282243, DDB_G0282339, DDB_G0282623, DDB_G0284621, DDB_G0288347, DDB_G0289415, DDB_G0289699, DDB_G0293560
		GO:0044391	ribosomal subunit	1.25966e-07	7.03719e-10	22	116	4.81016	DDB_G0269762, DDB_G0270380, DDB_G0270984, DDB_G0272308, DDB_G0273191, DDB_G0277195, DDB_G0277635, DDB_G0278195, DDB_G0279061, DDB_G0279387, DDB_G0279527, DDB_G0281699, DDB_G0284093, DDB_G0285597, DDB_G0286389, DDB_G0288295, DDB_G0290299, DDB_G0290311, DDB_G0290315, DDB_G0292286, DDB_G0292882, DDB_G0302511
		GO:0044429	mitochondrial part	4.90455e-07	2.73997e-09	36	302	3.02337	DDB_G0267454, DDB_G0268360, DDB_G0269470, DDB_G0269762, DDB_G0270152, DDB_G0270196, DDB_G0271774, DDB_G0272476, DDB_G0275311, DDB_G0275389, DDB_G0275537, DDB_G0276241, DDB_G0276417, DDB_G0277837, DDB_G0278195, DDB_G0279527, DDB_G0281699, DDB_G0282097, DDB_G0283763, DDB_G0284911, DDB_G0284947, DDB_G0286399, DDB_G0287621, DDB_G0288137, DDB_G0288777, DDB_G0288831, DDB_G0290299, DDB_G0290311, DDB_G02…
		GO:0032040	small-subunit processome	5.47544e-07	3.0589e-09	12	34	8.95154	DDB_G0269878, DDB_G0269972, DDB_G0271240, DDB_G0276815, DDB_G0277019, DDB_G0279371, DDB_G0280489, DDB_G0282243, DDB_G0282623, DDB_G0284621, DDB_G0286941, DDB_G0287537
		GO:0005759	mitochondrial matrix	1.37559e-06	7.68486e-09	20	109	4.6537	DDB_G0269762, DDB_G0270152, DDB_G0275311, DDB_G0276417, DDB_G0278195, DDB_G0279527, DDB_G0281699, DDB_G0283763, DDB_G0286399, DDB_G0288137, DDB_G0288777, DDB_G0290299, DDB_G0290311, DDB_G0290997, DDB_G0291648, DDB_G0291652, DDB_G0292286, DDB_G0292882, DDB_G0292994, DDB_G0293030
		GO:0043231	intracellular membrane-bounded organelle	2.01534e-06	1.12589e-08	160	2721	1.49137	DDB_G0267454, DDB_G0267768, DDB_G0268042, DDB_G0268360, DDB_G0268518, DDB_G0269470, DDB_G0269642, DDB_G0269688, DDB_G0269756, DDB_G0269762, DDB_G0269860, DDB_G0269878, DDB_G0269972, DDB_G0270042, DDB_G0270152, DDB_G0270156, DDB_G0270196, DDB_G0270482, DDB_G0270806, DDB_G0271240, DDB_G0271272, DDB_G0271292, DDB_G0271344, DDB_G0271506, DDB_G0271564, DDB_G0271774, DDB_G0271842, DDB_G0272374, DDB_G02…
		GO:0045335	phagocytic vesicle	4.35475e-06	2.43282e-08	39	373	2.65186	DDB_G0267420, DDB_G0268138, DDB_G0268948, DDB_G0269190, DDB_G0272632, DDB_G0273131, DDB_G0275311, DDB_G0276067, DDB_G0276221, DDB_G0276973, DDB_G0277087, DDB_G0277203, DDB_G0277493, DDB_G0277503, DDB_G0277947, DDB_G0278341, DDB_G0278345, DDB_G0279411, DDB_G0279591, DDB_G0279921, DDB_G0280041, DDB_G0281071, DDB_G0281551, DDB_G0283603, DDB_G0284669, DDB_G0285741, DDB_G0287587, DDB_G0287889, DDB_G02…
		GO:0098798	mitochondrial protein complex	5.62077e-06	3.14009e-08	20	118	4.29876	DDB_G0268360, DDB_G0269762, DDB_G0270196, DDB_G0271774, DDB_G0272476, DDB_G0275389, DDB_G0276241, DDB_G0276417, DDB_G0278195, DDB_G0279527, DDB_G0281699, DDB_G0283763, DDB_G0284911, DDB_G0284947, DDB_G0288777, DDB_G0290299, DDB_G0290311, DDB_G0291648, DDB_G0292286, DDB_G0292882
		GO:0030686	90S preribosome	6.82286e-06	3.81166e-08	10	27	9.39359	DDB_G0271240, DDB_G0277019, DDB_G0279903, DDB_G0281839, DDB_G0282623, DDB_G0284383, DDB_G0284621, DDB_G0287537, DDB_G0287891, DDB_G0289415
		GO:0044446	intracellular organelle part	7.99464e-06	4.46628e-08	120	1907	1.59597	DDB_G0267454, DDB_G0268360, DDB_G0269388, DDB_G0269470, DDB_G0269642, DDB_G0269688, DDB_G0269762, DDB_G0269860, DDB_G0269878, DDB_G0269972, DDB_G0270042, DDB_G0270152, DDB_G0270156, DDB_G0270196, DDB_G0270204, DDB_G0270380, DDB_G0270984, DDB_G0271240, DDB_G0271272, DDB_G0271774, DDB_G0272308, DDB_G0272374, DDB_G0272476, DDB_G0273003, DDB_G0273105, DDB_G0273191, DDB_G0274521, DDB_G0274775, DDB_G02…
		GO:0044422	organelle part	8.23831e-06	4.60241e-08	120	1908	1.59514	DDB_G0267454, DDB_G0268360, DDB_G0269388, DDB_G0269470, DDB_G0269642, DDB_G0269688, DDB_G0269762, DDB_G0269860, DDB_G0269878, DDB_G0269972, DDB_G0270042, DDB_G0270152, DDB_G0270156, DDB_G0270196, DDB_G0270204, DDB_G0270380, DDB_G0270984, DDB_G0271240, DDB_G0271272, DDB_G0271774, DDB_G0272308, DDB_G0272374, DDB_G0272476, DDB_G0273003, DDB_G0273105, DDB_G0273191, DDB_G0274521, DDB_G0274775, DDB_G02…
		GO:0030139	endocytic vesicle	1.56046e-05	8.71768e-08	39	391	2.52978	DDB_G0267420, DDB_G0268138, DDB_G0268948, DDB_G0269190, DDB_G0272632, DDB_G0273131, DDB_G0275311, DDB_G0276067, DDB_G0276221, DDB_G0276973, DDB_G0277087, DDB_G0277203, DDB_G0277493, DDB_G0277503, DDB_G0277947, DDB_G0278341, DDB_G0278345, DDB_G0279411, DDB_G0279591, DDB_G0279921, DDB_G0280041, DDB_G0281071, DDB_G0281551, DDB_G0283603, DDB_G0284669, DDB_G0285741, DDB_G0287587, DDB_G0287889, DDB_G02…
		GO:0031981	nuclear lumen	8.36005e-05	4.67042e-07	45	517	2.20758	DDB_G0269642, DDB_G0269688, DDB_G0269878, DDB_G0269972, DDB_G0270156, DDB_G0271240, DDB_G0271272, DDB_G0274521, DDB_G0276411, DDB_G0276815, DDB_G0277019, DDB_G0278039, DDB_G0278263, DDB_G0278331, DDB_G0279013, DDB_G0279371, DDB_G0279903, DDB_G0280407, DDB_G0280489, DDB_G0281685, DDB_G0281711, DDB_G0281839, DDB_G0282243, DDB_G0282339, DDB_G0282623, DDB_G0284383, DDB_G0284621, DDB_G0284817, DDB_G02…
		GO:0032991	protein-containing complex	0.000151281	8.45146e-07	104	1672	1.57758	DDB_G0268360, DDB_G0269190, DDB_G0269282, DDB_G0269642, DDB_G0269762, DDB_G0269878, DDB_G0269972, DDB_G0270042, DDB_G0270156, DDB_G0270196, DDB_G0270380, DDB_G0270436, DDB_G0270984, DDB_G0271240, DDB_G0271564, DDB_G0271774, DDB_G0272076, DDB_G0272308, DDB_G0272374, DDB_G0272442, DDB_G0272476, DDB_G0273003, DDB_G0273191, DDB_G0274115, DDB_G0274407, DDB_G0274521, DDB_G0275027, DDB_G0275389, DDB_G02…
		GO:0015935	small ribosomal subunit	0.000171859	9.60108e-07	11	45	6.19977	DDB_G0269762, DDB_G0272308, DDB_G0273191, DDB_G0277195, DDB_G0277635, DDB_G0279527, DDB_G0281699, DDB_G0284093, DDB_G0285597, DDB_G0292286, DDB_G0292882
		GO:0030687	preribosome, large subunit precursor	0.000589475	3.29316e-06	8	25	8.11606	DDB_G0269642, DDB_G0274521, DDB_G0279903, DDB_G0281839, DDB_G0284383, DDB_G0284817, DDB_G0289415, DDB_G0290031
		GO:0005829	cytosol	0.00106619	5.95639e-06	45	568	2.00937	DDB_G0268042, DDB_G0269190, DDB_G0269282, DDB_G0269388, DDB_G0269860, DDB_G0270380, DDB_G0270436, DDB_G0270984, DDB_G0272308, DDB_G0272754, DDB_G0272781, DDB_G0273449, DDB_G0274383, DDB_G0274471, DDB_G0274775, DDB_G0277087, DDB_G0277195, DDB_G0277493, DDB_G0277635, DDB_G0277725, DDB_G0277947, DDB_G0278275, DDB_G0278341, DDB_G0279061, DDB_G0279137, DDB_G0279387, DDB_G0281551, DDB_G0283987, DDB_G02…
		GO:0045254	pyruvate dehydrogenase complex	0.00207003	1.15644e-05	4	5	20.2901	DDB_G0271564, DDB_G0276417, DDB_G0291648, DDB_G0292994
		GO:0044445	cytosolic part	0.00216577	1.20993e-05	17	129	3.34237	DDB_G0269190, DDB_G0269282, DDB_G0270380, DDB_G0270984, DDB_G0272308, DDB_G0277195, DDB_G0277493, DDB_G0277635, DDB_G0279061, DDB_G0279387, DDB_G0284093, DDB_G0285597, DDB_G0286389, DDB_G0288295, DDB_G0290315, DDB_G0291358, DDB_G0302511
		GO:0000314	organellar small ribosomal subunit	0.00357134	1.99516e-05	5	10	12.6813	DDB_G0269762, DDB_G0279527, DDB_G0281699, DDB_G0292286, DDB_G0292882
		GO:0005763	mitochondrial small ribosomal subunit	0.00357134	1.99516e-05	5	10	12.6813	DDB_G0269762, DDB_G0279527, DDB_G0281699, DDB_G0292286, DDB_G0292882
		GO:0022626	cytosolic ribosome	0.00409153	2.28577e-05	13	84	3.92518	DDB_G0270380, DDB_G0270984, DDB_G0272308, DDB_G0277195, DDB_G0277635, DDB_G0279061, DDB_G0279387, DDB_G0284093, DDB_G0285597, DDB_G0286389, DDB_G0288295, DDB_G0290315, DDB_G0302511
		GO:0000313	organellar ribosome	0.00572833	3.20019e-05	8	33	6.14853	DDB_G0269762, DDB_G0278195, DDB_G0279527, DDB_G0281699, DDB_G0290299, DDB_G0290311, DDB_G0292286, DDB_G0292882
		GO:0005761	mitochondrial ribosome	0.00572833	3.20019e-05	8	33	6.14853	DDB_G0269762, DDB_G0278195, DDB_G0279527, DDB_G0281699, DDB_G0290299, DDB_G0290311, DDB_G0292286, DDB_G0292882
		GO:0034388	Pwp2p-containing subcomplex of 90S preribosome	0.00601603	3.36091e-05	4	6	16.9085	DDB_G0271240, DDB_G0277019, DDB_G0282623, DDB_G0284621
		GO:0031982	vesicle	0.00913285	5.10215e-05	45	619	1.84381	DDB_G0267420, DDB_G0268138, DDB_G0268948, DDB_G0269190, DDB_G0270204, DDB_G0272632, DDB_G0273131, DDB_G0274775, DDB_G0275121, DDB_G0275311, DDB_G0276067, DDB_G0276221, DDB_G0276973, DDB_G0277087, DDB_G0277203, DDB_G0277493, DDB_G0277503, DDB_G0277947, DDB_G0278341, DDB_G0278345, DDB_G0278477, DDB_G0279411, DDB_G0279591, DDB_G0279921, DDB_G0280041, DDB_G0281071, DDB_G0281551, DDB_G0283603, DDB_G02…
		GO:0044428	nuclear part	0.00956018	5.34088e-05	52	754	1.74915	DDB_G0269642, DDB_G0269688, DDB_G0269860, DDB_G0269878, DDB_G0269972, DDB_G0270042, DDB_G0270156, DDB_G0271240, DDB_G0271272, DDB_G0272374, DDB_G0273003, DDB_G0274521, DDB_G0276411, DDB_G0276815, DDB_G0277019, DDB_G0277257, DDB_G0278039, DDB_G0278263, DDB_G0278331, DDB_G0279013, DDB_G0279045, DDB_G0279371, DDB_G0279903, DDB_G0280407, DDB_G0280489, DDB_G0281685, DDB_G0281711, DDB_G0281839, DDB_G02…
		GO:0031410	cytoplasmic vesicle	0.0118762	6.63472e-05	44	607	1.83848	DDB_G0267420, DDB_G0268138, DDB_G0268948, DDB_G0269190, DDB_G0270204, DDB_G0272632, DDB_G0273131, DDB_G0274775, DDB_G0275121, DDB_G0275311, DDB_G0276067, DDB_G0276221, DDB_G0276973, DDB_G0277087, DDB_G0277203, DDB_G0277493, DDB_G0277503, DDB_G0277947, DDB_G0278341, DDB_G0278345, DDB_G0278477, DDB_G0279411, DDB_G0279591, DDB_G0279921, DDB_G0280041, DDB_G0281071, DDB_G0281551, DDB_G0283603, DDB_G02…
		GO:0097708	intracellular vesicle	0.0123406	6.89421e-05	44	608	1.83546	DDB_G0267420, DDB_G0268138, DDB_G0268948, DDB_G0269190, DDB_G0270204, DDB_G0272632, DDB_G0273131, DDB_G0274775, DDB_G0275121, DDB_G0275311, DDB_G0276067, DDB_G0276221, DDB_G0276973, DDB_G0277087, DDB_G0277203, DDB_G0277493, DDB_G0277503, DDB_G0277947, DDB_G0278341, DDB_G0278345, DDB_G0278477, DDB_G0279411, DDB_G0279591, DDB_G0279921, DDB_G0280041, DDB_G0281071, DDB_G0281551, DDB_G0283603, DDB_G02…
		GO:0015934	large ribosomal subunit	0.0171731	9.5939e-05	11	71	3.92943	DDB_G0270380, DDB_G0270984, DDB_G0278195, DDB_G0279061, DDB_G0279387, DDB_G0286389, DDB_G0288295, DDB_G0290299, DDB_G0290311, DDB_G0290315, DDB_G0302511
		GO:0005740	mitochondrial envelope	0.0272101	0.000152012	20	203	2.49879	DDB_G0267454, DDB_G0268360, DDB_G0269470, DDB_G0270196, DDB_G0271774, DDB_G0272476, DDB_G0275389, DDB_G0275537, DDB_G0276241, DDB_G0277837, DDB_G0282097, DDB_G0283763, DDB_G0284911, DDB_G0284947, DDB_G0287621, DDB_G0288777, DDB_G0288831, DDB_G0290299, DDB_G0290997, DDB_G0293556
		GO:0005743	mitochondrial inner membrane	0.031647	0.000176799	17	159	2.71173	DDB_G0267454, DDB_G0268360, DDB_G0269470, DDB_G0270196, DDB_G0271774, DDB_G0272476, DDB_G0276241, DDB_G0277837, DDB_G0282097, DDB_G0283763, DDB_G0284911, DDB_G0284947, DDB_G0287621, DDB_G0288777, DDB_G0290299, DDB_G0290997, DDB_G0293556
		GO:0031429	box H/ACA snoRNP complex	0.0423392	0.000236532	3	4	19.022	DDB_G0279013, DDB_G0288347, DDB_G0289699
		GO:0072588	box H/ACA RNP complex	0.0423392	0.000236532	3	4	19.022	DDB_G0279013, DDB_G0288347, DDB_G0289699
		GO:0019866	organelle inner membrane	0.0459701	0.000256816	17	164	2.62906	DDB_G0267454, DDB_G0268360, DDB_G0269470, DDB_G0270196, DDB_G0271774, DDB_G0272476, DDB_G0276241, DDB_G0277837, DDB_G0282097, DDB_G0283763, DDB_G0284911, DDB_G0284947, DDB_G0287621, DDB_G0288777, DDB_G0290299, DDB_G0290997, DDB_G0293556
	Molecular function	GO:0003735	structural constituent of ribosome	6.13825e-11	2.13134e-13	28	133	5.33951	DDB_G0269762, DDB_G0270380, DDB_G0270984, DDB_G0272308, DDB_G0273191, DDB_G0274407, DDB_G0277195, DDB_G0277635, DDB_G0278195, DDB_G0279061, DDB_G0279387, DDB_G0279527, DDB_G0279855, DDB_G0280287, DDB_G0281093, DDB_G0281699, DDB_G0283861, DDB_G0284093, DDB_G0285597, DDB_G0286389, DDB_G0288295, DDB_G0288983, DDB_G0290299, DDB_G0290311, DDB_G0290315, DDB_G0292286, DDB_G0292882, DDB_G0302511
		GO:0003824	catalytic activity	9.32543e-10	3.238e-12	202	3373	1.5189	DDB_G0267420, DDB_G0267730, DDB_G0267766, DDB_G0268138, DDB_G0268810, DDB_G0268876, DDB_G0268948, DDB_G0269212, DDB_G0269226, DDB_G0269282, DDB_G0269658, DDB_G0269756, DDB_G0269768, DDB_G0269790, DDB_G0269878, DDB_G0270042, DDB_G0270152, DDB_G0270196, DDB_G0270482, DDB_G0270642, DDB_G0270806, DDB_G0270850, DDB_G0270958, DDB_G0271336, DDB_G0271344, DDB_G0271506, DDB_G0271564, DDB_G0271774, DDB_G02…
		GO:0016491	oxidoreductase activity	2.53553e-05	8.80391e-08	47	521	2.288	DDB_G0267420, DDB_G0270806, DDB_G0271344, DDB_G0271774, DDB_G0272440, DDB_G0272466, DDB_G0272754, DDB_G0273105, DDB_G0273131, DDB_G0275069, DDB_G0275537, DDB_G0276331, DDB_G0276417, DDB_G0277203, DDB_G0277349, DDB_G0277725, DDB_G0277837, DDB_G0278095, DDB_G0279137, DDB_G0279827, DDB_G0279973, DDB_G0280997, DDB_G0281071, DDB_G0282097, DDB_G0284535, DDB_G0284947, DDB_G0285003, DDB_G0285025, DDB_G02…
		GO:0005198	structural molecule activity	3.28825e-05	1.14175e-07	30	259	2.93776	DDB_G0269762, DDB_G0270380, DDB_G0270984, DDB_G0272308, DDB_G0273191, DDB_G0274407, DDB_G0277195, DDB_G0277257, DDB_G0277635, DDB_G0278195, DDB_G0279045, DDB_G0279061, DDB_G0279387, DDB_G0279527, DDB_G0279855, DDB_G0280287, DDB_G0281093, DDB_G0281699, DDB_G0283861, DDB_G0284093, DDB_G0285597, DDB_G0286389, DDB_G0288295, DDB_G0288983, DDB_G0290299, DDB_G0290311, DDB_G0290315, DDB_G0292286, DDB_G02…
		GO:0030515	snoRNA binding	0.000205163	7.1237e-07	8	21	9.66197	DDB_G0278331, DDB_G0279013, DDB_G0282623, DDB_G0284621, DDB_G0287537, DDB_G0287891, DDB_G0288347, DDB_G0289699
		GO:0016879	ligase activity, forming carbon-nitrogen bonds	0.000419834	1.45776e-06	9	30	7.60881	DDB_G0276335, DDB_G0279591, DDB_G0280567, DDB_G0281551, DDB_G0283987, DDB_G0288145, DDB_G0288387, DDB_G0290121, DDB_G0290397
		GO:0043021	ribonucleoprotein complex binding	0.00453095	1.57325e-05	9	39	5.85293	DDB_G0268518, DDB_G0278471, DDB_G0279487, DDB_G0279903, DDB_G0280393, DDB_G0281839, DDB_G0288137, DDB_G0289415, DDB_G0293938
		GO:0016853	isomerase activity	0.0091656	3.1825e-05	14	99	3.58664	DDB_G0269226, DDB_G0272781, DDB_G0274471, DDB_G0275227, DDB_G0275295, DDB_G0278275, DDB_G0279737, DDB_G0280401, DDB_G0280463, DDB_G0283663, DDB_G0285455, DDB_G0287227, DDB_G0291434, DDB_G0295681
		GO:0009055	electron transfer activity	0.010478	3.63821e-05	9	43	5.30847	DDB_G0271774, DDB_G0272754, DDB_G0275537, DDB_G0277837, DDB_G0282097, DDB_G0284947, DDB_G0285003, DDB_G0291281, DDB_G0291648
		GO:0034513	box H/ACA snoRNA binding	0.017546	6.09236e-05	3	3	25.3627	DDB_G0279013, DDB_G0288347, DDB_G0289699
		GO:0016742	hydroxymethyl-, formyl- and related transferase activity	0.0218805	7.59738e-05	4	7	14.493	DDB_G0277087, DDB_G0277947, DDB_G0288985, DDB_G0291652
		GO:0016741	transferase activity, transferring one-carbon groups	0.0344076	0.000119471	17	154	2.79978	DDB_G0268948, DDB_G0269658, DDB_G0269768, DDB_G0269878, DDB_G0276115, DDB_G0276335, DDB_G0277087, DDB_G0277333, DDB_G0277947, DDB_G0278747, DDB_G0279211, DDB_G0281685, DDB_G0282615, DDB_G0283975, DDB_G0288985, DDB_G0291652, DDB_G0292286
		GO:0016667	oxidoreductase activity, acting on a sulfur group of donors	0.0377248	0.000130989	7	30	5.91796	DDB_G0272754, DDB_G0286383, DDB_G0287227, DDB_G0291145, DDB_G0291281, DDB_G0291648, DDB_G0292250
