# Supplementary material for: Investigation of the host transcriptional response to intracellular bacterial infection using Dictyostelium discoideum as a host model
Source: BMC Genomics. 2019 Dec 10;20:961. doi: 10.1186/s12864-019-6269-x (PMC6902447; doi:10.1186/s12864-019-6269-x)
Supplement: Supplementary file 6 — Additional file 6. Comparison of D. discoideum genes regulated in response to pathogenic bacteria and food bacteria. Regulation and description of genes included in Fig. 6. [file 12864_2019_6269_MOESM6_ESM.xlsx]

## Sheet: Blad 1
		M. marinum (RNA-seq)		L. pneumophila 1h (RNA-seq)		L. pneumophila 6h (RNA-seq)		E. coli (Microarray)
ID	Name	Log2FC	FDR	Log2FC	FDR	Log2FC	FDR	Log2FC	Description
DDB_G0283615	rpkA	1.8668	4.10735e-06	0.349432	0.95731	1.02649	0.0324341	n.s.	seven transmembrane G-protein coupled receptor (GPCR) that bears a C-terminal phosphatidylinositol-4-phosphate 5-kinase (PIP5K) domain
DDB_G0272720	DDB_G0272720	3.05786	1.30015e-09	0.0434848	0.999641	0.295323	0.711163	n.s.	highly similar to DDB_G0272947 and DDB_G0272718 contain several QPIY repeats and long stretches of histidines
DDB_G0272724	DDB_G0272724	1.78944	0.00164102	0.273238	0.999641	1.22792	0.0699792	n.s.	none
DDB_G0292378	fhbA	-2.18066	7.09048e-08	0.815643	0.485177	0.647946	0.371067	n.i.	none
DDB_G0285281	DDB_G0285281	2.57231	2.03555e-06	0.354992	0.999641	0.491322	0.834641	n.s.	none
DDB_G0292652	DDB_G0292652	2.04407	0.000117861	-1.17415	NA	2.1427	0.298007	n.s.	none
DDB_G0280503	DDB_G0280503	3.53781	9.04685e-07	2.60052	0.0109854	2.69084	0.0026432	n.s.	none
DDB_G0280501	DDB_G0280501	5.29485	2.19547e-18	-0.627894	NA	-0.531466	NA	n.i.	none
DDB_G0292518	DDB_G0292518	3.72645	7.77158e-13	-0.0646757	0.999641	0.654329	0.756798	n.i.	none
DDB_G0269572	DDB_G0269572	1.67337	0.00375325	0.802702	0.724706	2.61637	2.09039e-05	n.s.	similar to D. purpureum protein
DDB_G0289507	act25	1.63074	0.00561489	-0.107125	0.999641	1.897	0.121675	n.i.	has 74% identity with human beta-actin (SwissProt P60709)
DDB_G0295697	rabif	1.54716	0.0055383	0.619673	0.576324	-1.23148	0.0089047	n.i.	none
DDB_G0289881	atg5	1.83651	7.00437e-05	-0.129974	0.999641	0.951911	0.253515	n.i.	Dictyostelium homolog of yeast atg5; conjugated to atg12
DDB_G0277389	DDB_G0277389	1.29141	0.0197423	0.120704	0.999641	0.149591	0.874956	n.s.	none
DDB_G0270414	tmem56C	2.19989	0.000949936	0.472803	NA	0.790539	0.775306	n.s.	homolog of mammalian TMEM56; there are three genes in Dictyostelium: tmem56A, tmem56B, and tmem56C; contains 7 putative transmembrane domains
DDB_G0285295	vps28	1.59619	0.00127872	0.0598829	0.999641	-0.779747	0.531042	n.s.	component of the ESCRT-I complex (endosomal sorting complex required for transport)
DDB_G0291706	DDB_G0291706	5.91926	8.8856e-13	1.33884	NA	-2.68928	NA	n.s.	none
DDB_G0272815	cprE	1.20658	0.0304352	-1.60923	0.0268845	-2.74736	8.07309e-07	-1.23342	none
DDB_G0269452	DDB_G0269452	2.251	0.000537052	-3.26062	0.729234	-0.147411	0.978835	n.s.	none
DDB_G0292016	DDB_G0292016	2.87312	1.12624e-09	1.59501	0.00407098	1.83287	0.000147833	n.s.	none
DDB_G0283913	DDB_G0283913	2.11485	3.29066e-05	-0.540912	0.999641	-1.12521	0.510438	1.29401	large molecular weight protein that contains a hsp20 domain; highly similar to neighboring gene DDB_G0283911
DDB_G0280383	DDB_G0280383	1.61821	0.0151745	0.120233	0.999641	0.725084	0.403282	n.s.	none
DDB_G0276905	DDB_G0276905	3.98973	1.71331e-16	-0.59834	0.999641	-1.55881	0.234504	n.s.	none
DDB_G0284409	iliB	3.04413	5.28404e-06	4.03636	9.78084e-11	5.75096	1.56427e-23	n.s.	induced by Legionella pneumophila infection
DDB_G0291568	dnaja1	2.05273	0.000125123	-4.14465	0.38592	1.1325	0.800547	n.s.	conserved molecular chaperone, DnaJ homolog subfamily A member 1
DDB_G0267476	sigK	1.9382	0.0149657	-0.104928	0.999641	0.706458	0.591937	n.s.	regulated by the MADS-box transcription factor SrfA during development; expressed in stalk cells; contains two EGF domains
DDB_G0273465	DDB_G0273465	4.07311	3.31628e-12	0.753747	0.811059	-0.16652	0.903731	-1.23815	there is a second copy of this gene, DDB_G0273495
DDB_G0279921	gp130	-1.48905	0.00104485	-1.05754	0.283812	-2.01245	0.000479314	n.s.	contains amino terminal membrane insertion signal and carboxy terminal sequences for addition of lipid anchor; involved in pinocytosis
DDB_G0284643	DDB_G0284643	1.30685	0.00814901	-1.65263	0.0869078	1.96151	0.00858036	n.s.	none
DDB_G0278333	DDB_G0278333	1.41844	0.00505343	0.501529	0.757943	0.189691	0.806274	n.s.	none
DDB_G0289461	DDB_G0289461	1.93704	0.0126369	0.661463	0.814922	1.99191	0.000994358	n.s.	putative ortholog of H. sapiens CNOT6 and S. cerevisiae CCR4; component of the CCR4-NOT transcription complex
DDB_G0289467	DD8-14	1.37173	0.00591981	-0.676004	0.871267	-0.752134	0.437408	n.s.	involved in O-glycosylation as identified by mRNA differential display
DDB_G0288785	cbpL	1.25212	0.046449	0.762797	0.83312	0.470767	0.694716	n.s.	putative Ca2+-binding protein with 4 putative EF-hands; belongs to the frequenins, a family of myristoyl-switch calcium-binding proteins
DDB_G0284777	DDB_G0284777	2.81792	8.06527e-07	-1.33298	0.311255	-1.72441	0.0380759	n.i.	conserved protein
DDB_G0281087	gtaV	2.03331	0.0427028	0.253113	0.999641	2.75919	0.0437524	n.s.	has 20 amino acids between the two CX2C motifs
DDB_G0286361	DDB_G0286361	1.55872	0.0197423	0.342201	0.999641	-0.159938	0.897306	n.i.	none
DDB_G0286363	DDB_G0286363	2.08537	0.000251066	-0.217581	0.999641	-1.64257	0.000177653	n.s.	none
DDB_G0290233	mgp1	1.32743	0.0397492	0.458755	0.906058	0.804762	0.192896	n.s.	involved in the regulation of filopodium formation and the contractile vacuole network
DDB_G0284347	vps4	1.90561	2.52619e-06	-0.226233	0.999641	-0.110488	0.890248	n.s.	putative ESCRT-associated protein (endosomal sorting complex required for transport)
DDB_G0275133	DDB_G0275133	2.52492	9.50863e-08	3.33312	0.000403444	4.44331	4.18225e-08	n.s.	none
DDB_G0272783	rliA	-1.88411	3.41204e-06	-0.505349	0.999641	-3.27327	1.27247e-05	n.s.	twelve transmembrane domain protein that may act as a transporter; repressed after Legionella pneumophila infection
DDB_G0291834	cpiA	2.47047	1.36057e-06	-0.264023	0.999641	-0.677045	0.30919	n.i.	similar to animal and plant cystatin A1; member of the stefin family of cysteine protease inhibitors
DDB_G0269276	DDB_G0269276	1.34365	0.0265058	1.3961	0.0199176	2.38465	2.47894e-07	n.s.	none
DDB_G0271140	abcA7	4.17522	1.32355e-17	0.451965	0.929755	0.693866	0.302912	n.i.	half transporter, consisting of one ABC domain and one transmembrane domain
DDB_G0277791	racO	2.14157	0.0165329	2.94488	NA	3.1743	NA	n.s.	none
DDB_G0275497	DDB_G0275497	4.85806	7.79275e-17	-1.16204	0.68722	-3.71655	0.000186799	n.s.	none
DDB_G0272204	DDB_G0272204	3.22531	0.000395547	-0.321011	NA	1.38818	NA	n.s.	none
DDB_G0269510	vps37	1.69713	0.000164356	-0.119389	0.999641	0.436188	0.641922	n.s.	putative component of the ESCRT-I complex (endosomal sorting complex required for transport)
DDB_G0278765	DDB_G0278765	1.90369	0.00281543	0.532509	0.948582	2.60193	1.61975e-05	n.i.	none
DDB_G0271794	captA	1.79724	0.000491393	1.03328	0.0755777	1.15389	0.0131352	n.s.	catalyzes the reaction CDP-choline + 1,2-diacylglycerol = CMP + a phosphatidylcholine; putative ortholog of human CEPT1
DDB_G0286041	iliJ	1.47425	0.0266918	3.11642	0.000355046	4.12472	3.72909e-08	n.s.	contains a central, large T4 RNA ligase, RnlA-like domain, a property shared by a related gene DDB_G0289211; similar to D. purpureum protein; induced by Legionella pneumophila infection
DDB_G0277653	DDB_G0277653	1.61043	0.000785404	-0.973998	0.763028	0.641801	0.602469	n.s.	belongs to a large D. discoideum protein family of unknown function, many clustered on chr 2
DDB_G0268026	DDB_G0268026	2.12033	0.00027344	1.27186	0.0665567	2.1795	1.3167e-05	n.s.	contains 4 putative transmembrane domains; similar to D. purpureum protein
DDB_G0287471	DDB_G0287471	2.37464	0.000119755	0.725898	0.749572	1.61949	0.0117201	n.s.	contains a predicted signal peptide; ; similar to Polysphondylium pallidum 64 kDa cell surface glycoprotein
DDB_G0282567	DDB_G0282567	3.151	0.0215051	-1.47266	NA	1.75636	NA	n.i.	none
DDB_G0279637	DDB_G0279637	1.59023	0.0188999	1.89073	0.000308109	3.35772	7.31698e-15	n.s.	none
DDB_G0269620	DDB_G0269620	1.84675	0.044358	2.68219	NA	4.63036	NA	n.s.	none
DDB_G0293102	DDB_G0293102	1.68032	0.0131137	1.789	0.201977	2.51695	0.00813691	1.79159	none
DDB_G0279571	DDB_G0279571	3.26941	8.98374e-14	-0.918311	0.706431	-0.583305	0.60305	1.20462	contains repeats found in several Chlamydia polymorphic membrane proteins
DDB_G0286673	DDB_G0286673	1.36373	0.0200838	1.08647	0.588182	0.695262	0.551847	n.i.	none
DDB_G0286671	sir2B	2.31557	7.90354e-05	1.97819	0.00231184	1.73117	0.00427844	n.i.	N-terminus has several ankyrin repeats; C-terminus has a Sirutin (Sir2) domain, a NAD-dependent deacetylase that regulates various biological processes by deacetylating histones and other target proteins; expressed more highly during development; localized to prestalk and rearguard region of the slug, and to the apical disc, and upper and lower cups in the culminant (similar expression pattern as…
DDB_G0278481	iliN	1.12725	0.0449685	1.66626	0.000846725	3.0153	2.41741e-13	n.s.	conserved protein; induced by Legionella pneumophila infection
DDB_G0269700	DDB_G0269700	2.75617	2.84187e-05	1.33497	0.196296	0.767482	0.407732	n.s.	none
DDB_G0286191	atg8a	2.24822	1.55136e-08	0.280939	0.999641	0.450669	0.582845	n.s.	Dictyostelium homolog of yeast atg8
DDB_G0288417	DDB_G0288417	1.93351	5.12285e-05	-0.314072	0.999641	-1.10485	0.133479	n.s.	none
DDB_G0273217	DDB_G0273217	3.09212	9.01507e-14	-0.49816	0.999641	-2.1624	0.135858	4.5924	there is a second copy of this gene, DDB_G0273705
DDB_G0291081	pefA	2.10338	1.99055e-07	1.89763	0.00132886	1.03796	0.0983746	1.34462	similar to mammalian apoptosis component ALG-2; contains 5 EF-hand calcium binding domains
DDB_G0289863	DDB_G0289863	1.85589	0.0431174	0.77732	0.811059	2.55135	0.000223493	n.s.	none
DDB_G0274487	DDB_G0274487	1.64122	7.19309e-05	0.817669	0.438166	1.13816	0.0496165	n.s.	none
DDB_G0268622	rac1B	3.60807	1.86805e-11	2.28445	0.00169121	3.32826	4.55815e-08	n.s.	enriched in gametes
DDB_G0268626	DDB_G0268626	4.05768	1.31154e-19	0.110832	0.999641	-1.22793	0.292379	n.s.	Dictyostelium family protein
DDB_G0291646	DDB_G0291646	1.23907	0.0160767	-0.389154	0.999641	-0.28759	0.918653	1.83228	none
DDB_G0283159	DDB_G0283159	1.08897	0.045915	1.47944	0.0377716	1.43384	0.0196157	n.i.	none
DDB_G0277119	hspG8	3.49931	3.96239e-08	-4.88068	0.177032	0.752113	0.866945	n.i.	none
DDB_G0293122	DDB_G0293122	-1.29102	0.0128974	0.650546	0.927187	-3.80706	0.000147833	n.s.	similar to human GSTT2 (glutathione S-transferase theta-2); glutathione transferases participate in the detoxification of reactive electrophilic compounds by catalysing their conjugation to glutathione
DDB_G0278177	DDB_G0278177	2.26892	8.67804e-05	-0.3501	0.999641	-2.18074	0.178667	n.s.	none
DDB_G0278173	DDB_G0278173	1.40654	0.00695993	-0.572612	NA	-1.99827	0.308319	n.i.	none
DDB_G0277809	cfaA	4.57003	1.95132e-34	0.586899	0.999641	0.576478	0.708222	n.s.	none
DDB_G0270586	DDB_G0270586	3.5429	1.87675e-10	-1.5158	NA	-2.49431	NA	n.s.	none
DDB_G0274291	DDB_G0274291	2.74038	1.08224e-10	-0.283934	0.999641	-0.492962	0.826651	1.06	similar to bacteriophage T4 lysozyme (EC 3.2.1.17)
DDB_G0272182	DDB_G0272182	1.44387	0.00113727	0.12417	0.999641	0.737734	0.127364	n.s.	catalyzes the reaction L-arginine + H2O <=> L-citrulline + NH3; N-terminal half highly similar to bacterial argnine deiminase, an amidinotransferase
DDB_G0275451	alxA	1.72003	3.2954e-05	0.0961145	0.999641	0.733393	0.282914	n.s.	similar to mammalian Alix, which interacts with ALG-2 (apoptosis-linked gene 2); contains 1 BRO1 (Bro1-rhophilin) domain, 3 coiled-coil regions, 1 proline-rich region, and a conserved recognition sequence for Src-type tyrosine kinases
DDB_G0291314	DDB_G0291314	2.31227	0.000135036	-2.47786	0.834381	1.61148	0.67599	n.s.	highly similar to plant HSP101; similar to endopeptidase Clp; expressed in prespore cells
DDB_G0289485	vacA	1.51066	0.0122806	1.43511	0.0208481	1.86324	0.000239896	n.s.	expressed in post-lysosomal vacuole
DDB_G0279707	iliP	2.23618	9.18209e-06	2.31776	3.5725e-09	4.83382	4.68548e-43	-1.24404	contains a predicted signal peptide; induced by Legionella pneumophila infection; there are two similar genes in D. discoideum
DDB_G0267578	DDB_G0267578	2.75977	0.0047693	-2.19025	NA	0.617016	NA	n.i.	none
DDB_G0281793	DDB_G0281793	1.58454	0.00215827	1.98548	6.98901e-05	2.66157	1.1127e-09	n.s.	none
DDB_G0347658	DDB_G0347658	1.86868	3.76648e-06	0.421383	0.83312	0.102397	0.89615	n.s.	none
DDB_G0271340	DDB_G0271340	2.5882	1.32516e-08	1.39492	0.100611	2.37244	6.66949e-05	n.s.	catalyzes the reaction acyl-CoA + O2 <=> trans-2,3-dehydroacyl-CoA + H2O2; expressed in pstAB cells and in upper cup during culmination
DDB_G0274143	DDB_G0274143	3.00754	5.28404e-06	5.17128	1.498e-14	6.22238	2.93777e-22	n.i.	none
DDB_G0293862	DDB_G0293862	1.12845	0.041609	-0.0940333	0.999641	0.165099	0.874419	n.s.	expressed in pstA and pstO cells and in pstAB cells during culmination
DDB_G0274705	DDB_G0274705	-1.48146	0.000917253	-1.64778	0.0654145	-5.86234	3.09501e-12	n.i.	catalyzes the reaction RX + glutathione = HX + R-S-glutathione
DDB_G0289249	DDB_G0289249	3.78803	3.69737e-09	0.0898191	NA	-0.415752	NA	n.s.	none
DDB_G0270132	DDB_G0270132	1.57088	0.0172442	-0.214866	0.999641	-0.135953	0.89615	n.s.	none
DDB_G0269976	DDB_G0269976	2.3256	8.06527e-07	0.703455	0.40518	0.855873	0.0838884	n.s.	none
DDB_G0293274	DDB_G0293274	1.15293	0.0356655	0.0709199	0.999641	-0.108645	0.927616	n.s.	contains 2 FNIP domains; contains 1 B-box zinc finger domain
DDB_G0276399	rab8B	3.87327	2.69097e-06	3.20237	0.000191056	2.22557	0.0104041	n.s.	none
DDB_G0290435	DDB_G0290435	3.10064	5.26276e-06	4.07484	NA	4.60253	0.0480097	1.15405	none
DDB_G0278391	DDB_G0278391	6.81846	2.32645e-30	na	na	na	na	n.s.	contains a predicted signal peptide
DDB_G0290431	DDB_G0290431	4.47993	9.9154e-33	2.59737	0.00323289	2.07234	0.0143933	n.s.	none
DDB_G0275573	vps32	1.91724	2.68647e-06	-0.352285	0.983899	0.121858	0.898855	n.s.	involved in vesicle trafficking in yeast and mammals; expressed in endosome
DDB_G0268144	vwkA	1.58643	0.00127872	-0.234749	0.999641	0.133142	0.947086	n.s.	belongs to the Atypical Alpha protein kinases and contains a von Willebrand factor, type A (VWFA) domain; does not phosphorylate myosin heavy chain
DDB_G0291354	DDB_G0291354	-1.19528	0.0484753	-0.195979	0.999641	-1.95716	0.0323741	n.s.	none
DDB_G0276003	hspG2	3.10404	2.5047e-11	-3.29018	0.0667832	1.1961	0.508371	n.i.	none
DDB_G0292462	DDB_G0292462	2.89848	6.36249e-05	1.57566	0.280256	3.68207	2.15464e-06	n.s.	none
DDB_G0270730	fslB	-1.73192	0.043718	1.89801	0.00418636	3.73295	8.71156e-13	-1.47579	similar to the G-protein coupled receptors; contains 7 putative transmembrane domains and a potential signal sequence
DDB_G0274395	adcB	1.52118	0.00566663	-0.44901	0.960253	-0.250078	0.806319	n.s.	contains a C2 domain, a Ca2+-dependent membrane-targeting module
DDB_G0271068	iliC	1.67784	0.00102208	2.54009	0.00229684	4.15429	1.34089e-09	n.s.	induced by Legionella pneumophila infection; similar to D. purpureum protein
DDB_G0287097	DDB_G0287097	4.51423	9.91867e-35	0.868525	0.796405	0.275499	0.851568	n.i.	contains 4 FNIP repeats; conserved in Dictyostelium
DDB_G0267530	DDB_G0267530	1.119	0.0220783	0.0971463	0.999641	0.98099	0.13893	n.s.	none
DDB_G0293980	DDB_G0293980	2.60702	0.0280412	0.541818	0.964249	3.6539	1.16817e-09	n.s.	none
DDB_G0281135	DDB_G0281135	5.20813	3.90626e-39	3.40826	0.00188611	1.23202	0.357347	n.i.	none
DDB_G0284949	DDB_G0284949	6.80577	0.0161445	1.1936	NA	1.14752	NA	n.i.	none
DDB_G0278079	exdl2A	2.41917	4.60042e-06	0.778878	0.636409	3.22822	4.20861e-10	n.i.	very similar to mammalian exonuclease 3'-5' domain-like-containing protein 2 (EXDL2); the upstream Dictyostelium gene is very similar
DDB_G0293236	DDB_G0293236	1.63674	0.000471798	-0.0296483	0.999641	0.137672	0.899152	n.s.	none
DDB_G0290765	jcdA	1.66987	0.00168594	1.15431	0.177032	1.20689	0.059184	n.s.	none
DDB_G0274971	DDB_G0274971	3.23759	3.32983e-12	-0.819527	0.989741	-0.88155	0.636441	n.s.	none
DDB_G0275625	tlp4	1.43641	0.0352853	1.65738	0.000403444	2.42665	1.04418e-09	n.s.	none
DDB_G0284389	fia	1.99251	3.86038e-07	0.306511	0.989741	-0.180689	0.823543	-2.93976	composed of a DUF292 domain at the amino terminus, two filamin/ABP280 repeats and an actin domain at the carboxyl terminus
DDB_G0290969	DDB_G0290969	3.78868	1.50557e-22	-3.24621	0.343687	2.10754	0.230186	n.i.	none
DDB_G0270050	DDB_G0270050	1.52751	0.00597534	1.13278	0.219737	2.77157	2.06275e-07	n.s.	none
DDB_G0287225	DDB_G0287225	-2.3334	0.000838776	-0.586371	0.971124	1.19603	0.203524	n.i.	none
DDB_G0285375	atg18	1.52488	0.00113727	0.420552	0.934715	0.732533	0.231727	n.s.	ortholog of the conserved fungi ATG18 and very similar to the mammalian WIPI2 and WIPI1 proteins; contains 2 WD-40 repeats
DDB_G0284779	DDB_G0284779	1.84788	7.97821e-05	-0.617005	0.999641	-1.41415	0.2562	n.i.	none
DDB_G0286063	DDB_G0286063	1.13688	0.043718	-0.00638855	0.999641	0.525681	0.396093	n.s.	contains 7 predicted transmembrane domains
DDB_G0271104	DDB_G0271104	4.58128	5.07039e-08	3.11325	NA	4.29238	0.0958554	n.s.	none
DDB_G0282033	DDB_G0282033	2.09363	3.83666e-05	2.28248	7.2387e-06	2.89509	2.40656e-10	n.s.	very similar to major vault proteins, however, much smaller including D. discoideum mvpA and mvpB, which are double the length
DDB_G0267906	DDB_G0267906	1.29295	0.0331639	1.8504	1.2134e-05	3.04001	1.03698e-16	n.s.	related to the Ovarian Tumour (OTU) gene of Drosophila; function is unknown but conserved cysteine and histidine, and possibly the aspartate, residues suggests that those not yet recognized as peptidases could possess cysteine protease activity
DDB_G0288591	DDB_G0288591	-2.06054	7.78584e-05	0.155755	0.999641	-2.29896	0.0154078	n.i.	none
DDB_G0292098	DDB_G0292098	3.89868	6.12482e-07	1.81798	NA	4.9415	NA	n.s.	none
DDB_G0276841	DDB_G0276841	1.94557	2.54842e-06	-0.374558	0.999641	-1.58717	0.124423	n.s.	contains no functional domains
DDB_G0290491	atg8b	1.54833	0.00205811	0.148405	0.999641	0.297732	0.806319	n.i.	very similar to atg8 and also similar to human microtubule-associated protein 1 light chain 3 alpha (MAP1LC3A)
DDB_G0272546	DDB_G0272546	1.94456	0.0188159	-0.0969332	NA	4.36745	NA	n.i.	none
DDB_G0274237	DDB_G0274237	1.15481	0.0209925	0.484155	0.688679	-0.288086	0.631841	n.s.	conserved hypothetical protein similar to H. sapiens PLAC8 (placenta-specific 8)
DDB_G0293376	cpras2	1.66723	0.000346991	0.907909	0.142673	0.635521	0.235225	-1.24794	contains a circularly permuted GTPase domain with the conserved motifs G1-G2 lying downstream of the G3-G4-G5 motifs; large protein of unknown function whose domain composition is not conserved; a closely related ortholog is found in D. purpureum
DDB_G0285975	DDB_G0285975	2.29807	0.000673752	2.36227	0.00163442	2.85821	9.39957e-06	n.s.	none
DDB_G0285501	DDB_G0285501	1.48137	0.0147555	2.35459	1.41572e-08	3.15153	1.87953e-16	n.s.	none
DDB_G0287415	DDB_G0287415	1.19757	0.0264568	0.128603	0.999641	0.0400589	0.963632	n.s.	none
DDB_G0290377	agnB	1.96464	4.89023e-05	0.413415	0.999641	3.82794	1.94671e-05	n.s.	none
DDB_G0282369	ubqG	1.87692	2.23305e-05	1.52773	0.0128366	2.29464	3.08458e-06	n.i.	none
DDB_G0285359	DDB_G0285359	1.55464	0.00681138	0.305173	0.976247	0.678242	0.174717	-2.40176	none
DDB_G0289683	DDB_G0289683	2.80313	0.000229548	-0.495943	NA	-0.106308	NA	n.i.	none
DDB_G0289681	DDB_G0289681	4.27816	4.90307e-10	na	na	na	na	n.s.	none
DDB_G0267928	tmem144B	-1.31326	0.0426964	-0.226196	0.999641	-1.75313	0.000994358	-1.35	similar to human TMEM144; contains 10 predicted transmembrane domains
DDB_G0268802	gpaJ	1.74218	0.00281543	-0.710735	NA	-1.92005	NA	n.s.	none
DDB_G0269742	cdsA	1.35396	0.0107066	0.421168	0.89932	-0.0112375	0.991995	n.s.	catalyzes the reaction: CTP + phosphatidate = diphosphate + CDP-diacylglycerol; provides CDP-diacylglycerol an important precursor for the synthesis of phospholipids; contains 8 putative transmembrane domains
DDB_G0274259	DDB_G0274259	2.21337	3.66897e-07	3.1254	4.99937e-15	3.08408	2.6647e-15	n.s.	none
DDB_G0293038	DDB_G0293038	2.66596	2.46027e-12	0.106998	0.999641	-0.3337	0.635418	n.s.	none
DDB_G0293032	DDB_G0293032	1.32555	0.0149007	1.73689	0.000152331	1.7163	4.40393e-05	n.s.	none
DDB_G0279191	vacB	2.41685	4.82382e-10	-0.890248	0.513922	-0.311931	0.763478	n.i.	marker of the post-lysosomal vacuole, plays a role late in the endocytic pathway, may target the vacuole for exocytosis
DDB_G0267438	abcA2	2.58902	8.02758e-12	0.169374	0.999641	-0.353952	0.644076	1.39796	full transporter, consisting of two ABC domains and two transmembrane domains
DDB_G0291245	abcA6	3.59675	4.48059e-15	-0.146133	0.999641	-1.25804	0.0876266	n.s.	full transporter, consisting of two ABC domains and two transmembrane domains
DDB_G0284037	DDB_G0284037	1.33546	0.00841179	0.119212	0.999641	0.535706	0.519928	n.s.	weakly similar to 26S proteasome regulatory subunit RPN11 (MPR1 protein); REMI mutant forms aberrant fruiting bodies (see http://wiki.dictybase.org/dictywiki/index.php/DDB_G0284037)
DDB_G0289553	act1	-1.24995	0.0402099	-0.834333	0.811059	-1.41691	0.119297	n.i.	has 94% identity with human beta-actin (SwissProt P60709); encodes one of the 17 identical actin proteins in the Dictyostelium genome (act1, act2, act4, act5, act6, act7, act8, act9, act11, act12, act13, act14, act15, act16, act19, act20, and act21)
DDB_G0269664	DDB_G0269664	2.2083	5.98235e-09	-0.388237	0.960253	-0.492817	0.490063	n.i.	none
DDB_G0276317	DDB_G0276317	1.08593	0.043718	0.159356	0.999641	1.46862	0.00109642	n.s.	none
DDB_G0287721	DDB_G0287721	2.03268	3.29066e-05	0.0130004	0.999641	-0.143981	0.87816	n.s.	none
DDB_G0291748	DDB_G0291748	3.88341	7.55415e-21	1.83888	0.443008	1.32104	0.412568	n.s.	none
DDB_G0289787	DDB_G0289787	2.78499	2.30352e-09	-1.11948	0.95181	-2.88954	0.119134	n.s.	none
DDB_G0290305	DDB_G0290305	2.12007	1.44912e-05	-0.799186	0.651201	-1.32118	0.0582524	n.s.	none
DDB_G0286929	DDB_G0286929	1.17837	0.0336486	1.53478	0.00063899	2.1315	2.57154e-08	n.s.	none
DDB_G0286927	nedd8l2	3.34021	2.63198e-14	0.292502	0.999641	-0.890123	0.671077	n.s.	similar to the conserved NEDD8 (neddylin) protein, however, this is the most divergent member of the family in Dictyostelium
DDB_G0292334	DDB_G0292334	1.25789	0.025756	-0.739557	NA	-4.13545	NA	n.s.	the C-terminal of this protein is conserved
DDB_G0293016	DDB_G0293016	2.38783	4.58008e-05	2.35496	NA	2.36615	NA	n.i.	none
DDB_G0288501	ddx42	-1.3161	0.00779058	0.435486	0.94683	-2.28688	1.28747e-05	n.s.	conserved putative RNA helicase; very similar to mammalian DDX42
DDB_G0267414	repD	1.66633	0.0160767	-0.0589549	0.999641	-0.499011	0.509415	n.s.	ortholog of H. sapiens xeroderma pigmentosum group D (XPD), M. musculus ERCC2 and S. cerevisiae RAD3
DDB_G0284921	DDB_G0284921	2.84152	9.89681e-15	-0.136123	0.999641	-0.223786	0.780918	n.s.	none
DDB_G0281767	DDB_G0281767	2.63502	0.00165616	2.81132	0.00183184	2.10243	0.0184028	n.s.	none
DDB_G0284925	DDB_G0284925	4.23895	6.23233e-09	1.8697	0.0102923	1.98832	0.00172102	n.i.	this is one of four almost identical genes on C4 (DDB_G0284931, DDB_G0284927) on C2
DDB_G0281345	DDB_G0281345	5.36142	2.65556e-36	-0.650891	0.999641	-1.47142	0.308319	n.i.	none
DDB_G0273409	hspF-1	3.10014	1.05893e-10	-1.76377	0.456184	-2.43062	0.0698636	1.51755	there is a second copy of this gene, hspF-2
DDB_G0284121	DDB_G0284121	1.92633	0.0358245	-0.305526	NA	-0.759885	NA	n.s.	contains two predicted transmembrane domains
DDB_G0286153	DDB_G0286153	1.54904	0.0432867	0.21845	NA	0.411863	0.88304	n.s.	none
DDB_G0283911	DDB_G0283911	1.43823	0.0124988	-1.10326	0.814922	-1.7764	0.167819	1.55468	highly similar to neighboring gene DDB_G0283913
DDB_G0291229	abpF	1.88095	2.03555e-06	0.725173	0.335695	0.0917557	0.912464	n.s.	actin-binding protein that localizes to the centrosome; expression enhanced in myosin II knock-out cells; purified protein makes ring-like structures in vitro (from K. R. Niebling's Thesis (1993), James Spudich Lab, Standford U.)
DDB_G0276293	DDB_G0276293	1.52215	0.00101939	-0.205914	0.999641	-0.401641	0.618908	n.s.	contains eight transmembrane domains
DDB_G0289575	DDB_G0289575	4.4598	1.44394e-12	-0.955127	0.862828	-2.22875	0.0595745	n.s.	none
DDB_G0283415	DDB_G0283415	1.23565	0.0260942	0.0838793	0.999641	1.3445	0.0346329	n.s.	none
DDB_G0279743	tlp3	1.29778	0.0123135	0.141047	0.999641	0.363544	0.695112	n.s.	none
DDB_G0271516	DDB_G0271516	1.27373	0.0432867	-0.372203	0.999641	-0.572396	0.556027	n.s.	none
DDB_G0270606	DDB_G0270606	2.1463	0.00423092	1.29171	NA	2.79033	0.212462	n.s.	none
DDB_G0349042	DDB_G0349042	2.28945	0.000243159	3.84025	3.31168e-14	5.74882	2.02107e-33	n.i.	none
DDB_G0291410	DDB_G0291410	-1.31868	0.0390148	0.73484	0.587206	0.495509	0.519752	n.i.	none
DDB_G0281223	DDB_G0281223	2.32653	0.000115042	0.160043	NA	1.31226	NA	n.s.	none
DDB_G0291562	osbL	2.17527	0.000405112	0.525927	0.98752	1.95512	0.0135343	n.s.	none
DDB_G0286907	ubqD	1.9299	0.0006014	1.29263	0.00407098	0.818066	0.073279	n.i.	none
DDB_G0275959	DDB_G0275959	2.7571	1.03945e-08	1.22514	0.0177607	1.07056	0.0224725	n.s.	some members of this family have guanine nucleotide exchange activity
DDB_G0276973	nramp1	-1.18756	0.0209925	0.807892	0.288894	-1.54399	0.000523722	-2.19701	ortholog of the mammalian SLC11a1; transports iron across the phagolysosomal membrane; contains 12 transmembrane domains
DDB_G0271722	DDB_G0271722	1.80405	0.0340058	-1.8633	NA	-1.81794	NA	-1.18195	similar to extracellular matrix protein; contains a putative signal peptide
DDB_G0287407	DDB_G0287407	1.82581	0.000915932	1.01302	0.176953	1.87843	0.000105619	n.s.	similar to nephrocystin 3, Grp94 neighboring nucleotidase, and other TPR repeat-containing proteins
DDB_G0280211	DDB_G0280211	1.72121	0.00493195	1.64174	0.409721	3.05277	0.00337441	n.s.	none
DDB_G0280219	vps55	1.84795	0.000102458	0.553573	0.950517	0.714989	0.449052	n.i.	highly similar to yeast VPS55 (vacuolar protein sorting 55) and human LEPROTL1 (leptin receptor overlapping transcript-like 1)
DDB_G0289599	comA	1.39099	0.0139151	0.503797	0.83332	0.533852	0.428772	n.s.	connects the actin cytoskeleton to the Golgi apparatus; actin binding protein, bundles actin filaments; plays a role in phagocytosis
DDB_G0293276	DDB_G0293276	3.01608	0.0039948	2.8652	0.00236565	2.97481	0.000394061	n.s.	member of the AGC kinase group; similar to kinase domains of Akt/PKB and MAST (microtubule-associated serine/threonine kinase) family members
DDB_G0269112	celB	2.86729	6.15931e-06	0.467109	0.999641	5.72922	3.06922e-10	n.s.	none
DDB_G0279899	DDB_G0279899	1.37952	0.0165877	-1.62461	0.619125	1.72755	0.166336	n.i.	none
DDB_G0279721	ubqH	4.0302	4.43435e-13	2.65681	0.00153623	2.54417	0.000893922	n.i.	none
DDB_G0268790	DDB_G0268790	1.26147	0.0106967	0.309077	0.948892	-0.000457744	0.999388	n.s.	belongs to the synaptotagmin family; contains a predicted signal sequence and a transmembrane domain
DDB_G0291430	DDB_G0291430	3.10156	0.00232	2.32728	NA	1.15531	0.657826	n.s.	none
DDB_G0276709	DDB_G0276709	1.59082	0.0197811	0.729754	NA	2.04141	NA	n.s.	none
DDB_G0285127	DDB_G0285127	2.4578	0.00184522	-1.40437	0.74721	-1.08348	0.521082	n.s.	none
DDB_G0280513	DDB_G0280513	1.19953	0.0426964	0.293743	0.999641	-0.096122	0.951956	n.s.	none
DDB_G0276951	hspG7	2.15236	0.00233474	-4.17179	0.311255	0.620946	0.889863	n.i.	none
DDB_G0276953	hspG9	3.13307	4.82482e-09	-4.51281	0.366308	0.81981	0.871985	n.s.	none
DDB_G0278623	DDB_G0278623	1.08839	0.0358245	-0.116308	0.999641	-1.21064	0.00382757	n.i.	none
DDB_G0278257	DDB_G0278257	1.13712	0.0281972	-0.307196	0.979585	-0.375834	0.551636	n.s.	similar to human BROX; contains one BRO1 domain
DDB_G0285607	DDB_G0285607	2.05653	3.23233e-05	-0.4804	0.999641	0.684805	0.628733	n.i.	none
DDB_G0285605	DDB_G0285605	-1.64603	0.00204038	-0.429779	0.989741	-0.680157	0.431411	n.s.	none
DDB_G0285609	DDB_G0285609	1.47249	0.0390085	-0.369419	0.999641	0.647878	0.538205	n.s.	none
DDB_G0291592	DDB_G0291592	1.86608	0.0224589	1.53344	0.441465	2.17496	0.0410741	n.s.	none
DDB_G0291754	DDB_G0291754	1.34529	0.0104247	0.105076	0.999641	0.742518	0.122952	n.i.	none
DDB_G0292400	vps2B	1.88157	4.99152e-06	0.145794	0.999641	0.137972	0.856056	n.s.	putative ortholog of human CHMP2A (Chromatin Modifying Protein 2A) and yeast DID4 (Doa4-Independent Degradation), component of the ESCRT-III complex (endosomal sorting complex required for transport)
DDB_G0269174	rab1C	1.67954	0.00030961	0.113757	0.999641	-0.121525	0.881018	n.s.	similar to rab1
DDB_G0270644	DDB_G0270644	2.46328	0.00015612	4.29974	3.00398e-09	4.89741	7.82564e-13	n.i.	none
DDB_G0268556	psiE	2.25398	5.56315e-07	-0.830843	NA	-0.19572	NA	n.s.	contains a signal peptide and a PA14 domain
DDB_G0281913	DDB_G0281913	2.27325	4.73646e-06	1.32698	0.110601	2.72736	1.18639e-06	n.i.	conserved in plants, fungi and bacteria
DDB_G0272252	DDB_G0272252	1.43798	0.0138628	0.351232	0.999641	-0.235113	0.868942	n.i.	none
DDB_G0288091	DDB_G0288091	2.93027	8.64841e-10	1.45139	0.000846725	3.3978	2.11224e-22	-1.68838	conserved hypothetical 277 aa Dictyostelium protein
DDB_G0288095	DDB_G0288095	-1.41872	0.0148286	0.184416	0.999641	1.72815	4.6448e-05	-1.29514	conserved in Dictyostelium and Polysphondylium; contains a predicted signal peptide
DDB_G0285723	DDB_G0285723	4.73256	8.43321e-12	1.01587	0.89932	2.42236	0.0454996	2.77323	none
DDB_G0278649	iliK	1.18738	0.0229091	1.79698	2.04245e-05	2.63641	1.05514e-12	n.s.	belongs to a superfamily of metalloenzymes; induced by Legionella pneumophila infection
DDB_G0270098	sqstm1	1.20329	0.0220487	-0.202253	0.999641	0.616982	0.497571	n.i.	similar to the conserved ubiquitin-binding protein p62/SQSTM1; in Dictyostelium found in large ubiquitinated protein aggregates present in vmp1- and atg1- autophagy mutants
DDB_G0276551	DDB_G0276551	1.73977	0.000382005	0.30404	0.999641	0.526791	0.606591	n.s.	protein family conserved in protozoans, fungi, and invertebrate animals
DDB_G0287025	DDB_G0287025	1.69665	0.00614798	1.07519	0.214378	0.441679	0.605213	n.s.	none
DDB_G0275161	DDB_G0275161	1.48224	0.000471798	0.89208	0.920988	2.70309	0.0124949	1.53885	none
DDB_G0268208	DDB_G0268208	4.23085	2.71208e-17	1.18072	0.807647	-3.72889	0.0200775	n.s.	none
DDB_G0282701	DDB_G0282701	-1.60347	0.0449319	0.589703	0.815454	0.836037	0.217918	n.i.	none
DDB_G0272801	DDB_G0272801	1.33849	0.0496384	0.934102	0.199801	0.485519	0.469672	n.s.	there is a second copy of this gene, DDB_G0273985
DDB_G0279325	DDB_G0279325	1.76238	0.00112155	1.49635	0.0225104	2.46091	1.07218e-06	n.s.	none
DDB_G0271138	abcA8	3.98678	1.46473e-16	-0.0358925	0.999641	0.883734	0.268552	n.s.	half transporter, consisting of one ABC domain and one transmembrane domain
DDB_G0285165	abcC9	2.36074	2.64661e-08	1.71848	0.0311097	2.7451	4.55942e-06	n.i.	full transporter, consisting of two ABC domains and two transmembrane domains
DDB_G0269482	DDB_G0269482	2.97952	4.35628e-14	-1.30488	0.488158	-2.64534	0.00350721	n.s.	conserved hypothetical Dictyostelium protein; contains a weak von Willebrand factor, type A domain
DDB_G0292736	plc	1.41325	0.00308273	-0.25502	0.999641	-0.427936	0.567187	n.s.	catalyzes the reaction 1-phosphatidyl-1D-myo-inositol 4,5-bisphosphate + H2O = D-myo-inositol 1,4,5-trisphosphate + diacylglycero; regulated by the MADS-box transcription factor SrfA during development
DDB_G0292506	DDB_G0292506	2.45	0.000165229	0.295565	0.999641	0.473222	0.813862	n.s.	none
DDB_G0290259	cfrB	1.94809	0.010992	1.7676	9.51773e-05	3.57232	1.03654e-21	n.i.	none
DDB_G0276219	DDB_G0276219	1.12769	0.0390085	-2.47137	NA	-4.35574	NA	n.s.	contains one transmembrane domain
DDB_G0282929	atg12	2.25938	2.73457e-06	0.0554027	0.999641	0.36236	0.740545	n.i.	Dictyostelium homolog of yeast atg12
DDB_G0277849	dymA	1.51338	0.000268733	-0.276825	0.999641	-0.185809	0.83551	-1.21526	none
DDB_G0287879	DDB_G0287879	1.26194	0.0331639	0.516928	0.89932	0.567876	0.477464	n.s.	none
DDB_G0267612	DDB_G0267612	4.29477	0.000876227	1.59751	NA	1.48058	NA	n.s.	none
DDB_G0279307	vacC	6.04438	1.67599e-48	-1.11625	0.894266	0.425867	0.846253	n.s.	very similar to Dictyostelium vacuolin A and B
DDB_G0285981	DDB_G0285981	2.53136	4.31652e-06	2.02819	0.000802741	1.42714	0.0183027	n.s.	similar to the vertebrate loss of heterozygosity 11, chromosomal region 2, gene A
DDB_G0275487	DDB_G0275487	2.61085	1.63368e-07	-0.218904	NA	-2.76831	0.411551	n.s.	none
DDB_G0284295	iliG	-1.67187	0.0127142	0.953552	0.132043	5.15184	2.42194e-43	n.s.	CAZy family GH9; catalyzes the hydrolysis of glucosidic linkages; induced by Legionella pneumophila infection
DDB_G0269500	DDB_G0269500	1.61187	0.00233474	0.121885	0.999641	0.675444	0.315502	n.s.	similar to D. purpureum protein; contains 5 predicted transmembrane domains
DDB_G0283113	eriA	1.85674	0.000451655	2.70503	0.000999027	3.73485	7.46714e-08	n.s.	similar to C. elegans eri-1, RNA exonuclease that acts as a negative regulator of RNA interference (RNAi); contains one exonuclease domain
DDB_G0270140	rasZ	3.7467	0.0249591	2.01082	0.353512	0.946753	0.610501	n.i.	enriched in gametes
DDB_G0283921	ctsB	1.48974	0.00139077	-0.761224	0.651201	-0.724995	0.348922	-1.47665	member of the papain cysteine protease family, which has a wide range of specificities
DDB_G0287559	DDB_G0287559	6.3182	0.00175222	-2.46571	NA	-2.45415	NA	n.s.	none
DDB_G0271672	DDB_G0271672	3.09174	0.000109237	0.0509635	0.999641	-0.348901	0.732492	n.s.	member of the ZIP (Zrt- and Irt-like Protein) family capable of transporting zinc and other metal ions; contains 6 transmembrane domains
DDB_G0279871	DDB_G0279871	-2.05483	0.000405112	0.433093	0.999641	1.16911	0.504904	n.s.	member of a large D. discoideum gene family that seems to be more diverse and not so expanded in D. purpureum and P. pallidum
DDB_G0268140	DDB_G0268140	1.43892	0.0113323	0.776511	0.529687	1.2967	0.0259094	n.i.	none
DDB_G0288131	cmbB	-1.55286	0.00303105	0.348597	0.999641	0.780756	0.421299	1.34	calmodulin-binding protein comprised of tandem repeats of newly identified IP22 motifs, which occur in mimivirus and Dictyostelium; IP22 motifs may play a role in cell motility and chemotaxis
DDB_G0272793	DDB_G0272793	1.93482	0.00370471	-2.4585	NA	-4.31816	NA	n.s.	there is a second copy of this gene, DDB_G0274089
DDB_G0287993	vps60	1.75271	1.98516e-05	-0.0829826	0.999641	0.404156	0.575813	n.s.	ortholog of yeast VPS60 and human CHMP5 (CHromatin Modifying Protein 5), which associates with the ESCRT-III complex (endosomal sorting complex required for transport)
DDB_G0276479	ctnC	-1.59566	0.0276994	-0.297651	0.999641	2.16857	0.00279201	n.s.	similar to countin (CtnA)
DDB_G0275469	DDB_G0275469	1.46831	0.00184522	1.88032	0.000137703	2.32605	8.22385e-08	n.s.	similar to endonuclease V, which catalyses the endonucleolytic cleavage of apurinic or apyrimidinic sites to generate products with a 5'-phosphate
DDB_G0292312	DDB_G0292312	2.95157	1.24301e-05	1.64013	0.000316195	0.99968	0.0341036	n.s.	none
DDB_G0292642	DDB_G0292642	1.36618	0.0202423	0.981907	0.346992	1.08864	0.100783	n.s.	none
DDB_G0292236	DDB_G0292236	2.52165	2.78651e-10	0.389015	0.999641	0.49833	0.722743	n.s.	conserved hypothetical protein; contains a putative signal peptide
DDB_G0291075	warA	-1.51394	0.0311942	0.555866	0.999641	1.09135	0.440729	n.s.	controls cell-type proportioning
DDB_G0283825	DDB_G0283825	1.50608	0.0308311	-0.149782	0.999641	-0.0123132	0.994858	n.i.	none
DDB_G0289411	DDB_G0289411	1.52336	0.00095698	-2.45928	0.00385164	-0.415928	0.739609	n.s.	none
DDB_G0271488	vta1	1.96607	5.28666e-07	-0.347594	0.999641	0.269356	0.805708	n.s.	similar to human and yeast VTA1 involved in endosomal protein sorting
DDB_G0274499	DDB_G0274499	-1.3315	0.0212048	0.923426	0.145206	2.65811	1.50352e-11	-1.10762	member of the patatin family of glycoproteins, which are storage proteins but also possess lipase activity; contains a predicted signal peptide
DDB_G0274495	DDB_G0274495	-1.31705	0.0235635	0.16287	0.999641	0.870477	0.54229	n.s.	contains one HTTM (horizontally transferred transmembrane) domain; contains 5 transmembrane domains
DDB_G0282293	rnpA	3.96318	6.58338e-14	-0.289317	NA	1.88999	0.45936	n.s.	regulated by the MADS-box transcription factor SrfA during development
DDB_G0285681	DDB_G0285681	1.83978	0.000300665	1.18675	0.0783267	0.774242	0.216957	n.i.	none
DDB_G0281853	iliL	5.03966	1.29752e-23	6.48967	0.000957624	10.0427	1.03698e-09	n.s.	similar to Dictystelium cell surface glycoproteins gp130, and GP138A, B, C, and D; contains a predicted signal peptide; induced by Legionella pneumophila infection
DDB_G0277125	hspG11	2.78935	9.03602e-07	-2.66157	0.623484	1.3704	0.616269	n.i.	none
DDB_G0293992	DDB_G0293992	2.32738	0.0009254	0.429519	0.999641	0.330064	0.872043	n.s.	contains one C2 domain, which is is a Ca2+-dependent membrane-targeting module found in many cellular proteins involved in signal transduction or membrane trafficking
DDB_G0278163	DDB_G0278163	2.83167	1.86805e-11	0.14362	0.999641	0.897389	0.100067	n.s.	contains a conserved TM2 domain, a pair of transmembrane alpha helices connected by a short linker
DDB_G0274115	abcG12	-1.16639	0.0182766	-0.0559257	0.999641	-1.11489	0.0183453	n.s.	half transporter, consisting of one ABC domain and one transmembrane domain
DDB_G0289261	DDB_G0289261_ps	3.66677	7.64442e-06	-0.971381	NA	-0.967397	NA	n.s.	putative pseudogene; similar to family of Endotoxin_N-terminal domain-containing proteins, including DDB_G0293578, DDB_G0289249
DDB_G0292740	DDB_G0292740	2.4579	3.41204e-06	1.73947	0.000505368	0.980783	0.0647186	n.i.	related to H. sapiens BCSC-1 (LOH11CR2A), a possible tumor suppressor gene
DDB_G0289149	litaf	1.31015	0.025053	0.560577	0.77944	1.34348	0.00950762	n.s.	D. dicoideum ortholog of the conserved lipopolysaccharide-induced tumor necrosis factor alpha factor (LITAF), induced in mamalian cells following treatment with lipopolysaccharide, a small integral membrane protein of lysosome/late endosome; contains one predicted transmembrane domain
DDB_G0281331	DDB_G0281331	1.48111	0.00946072	0.356824	0.999641	0.258906	0.822747	n.s.	putative protein serine/threonine kinase; similar to vertebrate Nek kinases which are involved in regulation of mitosis; contains 7 predicted transmembrane domains
DDB_G0280317	DDB_G0280317	-1.12829	0.0283929	-0.200293	0.999641	-1.94232	0.0001187	-2.4	catalyzes the reaction RX + glutathione <=> HX + R-S-glutathione
DDB_G0274585	DDB_G0274585	-1.98073	0.000388373	0.655878	0.50343	1.38299	0.00200231	n.i.	similar to A. thaliana short chain specific acyl-Coa oxidase ACX4, which catalyzes the first step of peroxisomal fatty acid beta-oxidation
DDB_G0279755	DDB_G0279755	2.1015	2.80011e-05	2.21777	3.98472e-08	1.84425	3.41479e-06	n.s.	contains a nucleic acid binding domain, the oligonucleotide/oligosaccharide binding motif (OB fold); similar to conserved hypothetical fungal proteins
DDB_G0290215	DDB_G0290215	1.30283	0.0374409	-0.201589	0.999641	-0.331189	0.767922	n.s.	none
DDB_G0274477	DDB_G0274477	3.18274	0.045915	-0.872914	NA	1.91385	0.424378	n.s.	none
DDB_G0272612	DDB_G0272612	1.85075	1.0365e-05	0.480698	0.853853	0.402289	0.580705	-1.52	there is a second copy of this gene, DDB_G0274027
DDB_G0282209	DDB_G0282209	2.67738	2.74705e-07	0.790078	0.673898	0.922409	0.232269	n.s.	weakly related to Sec23/Sec24 involved in COPII-coated vesicles intracellular transport
DDB_G0285003	aifC	-2.30945	3.16088e-09	-0.200047	0.999641	-5.93374	3.72909e-08	n.s.	similar to H. sapiens AIFM2, a caspase-independent mitochondrial effector of apoptotic cell death
DDB_G0290261	cfrC	4.41279	8.42411e-26	4.57175	3.34336e-26	4.64069	1.02711e-27	n.s.	none
DDB_G0289675	adprh	1.67211	0.000240239	-1.12698	0.187832	-1.89248	0.000805751	1.01078	conserved enzyme; catalyzes the reaction: N(omega)-(ADP-D-ribosyl)-L-arginine + H(2)O = ADP-ribose + L-arginine; reverses the reaction of mono-ADP-ribosylation
DDB_G0290265	cfrD	1.82616	0.0196037	4.81112	3.16074e-26	5.97372	4.16502e-42	n.s.	none
DDB_G0281781	DDB_G0281781	2.32614	6.98291e-09	-0.183327	0.999641	-1.16332	0.0409063	n.s.	none
DDB_G0286983	DDB_G0286983	2.75448	2.5047e-11	0.236162	0.999641	-0.430692	0.551636	n.s.	none
DDB_G0291918	DDB_G0291918	2.11613	9.60646e-08	0.727883	0.524227	1.32806	0.0113779	n.s.	putative protein serine/threonine kinase, CAMK group; kinase domain is similar to those of mammalian death-associated protein kinases (DAPK)
DDB_G0273485	DDB_G0273485	1.57875	0.0161756	0.0543758	0.999641	-0.437771	0.507315	n.s.	there is a second copy of this gene, DDB_G0273493
DDB_G0273487	DDB_G0273487	3.49545	8.21798e-09	0.787124	0.929755	2.15459	0.0252071	n.s.	there is a second copy of this gene, DDB_G0273491
DDB_G0272194	DDB_G0272194	2.38305	0.00106795	2.00763	0.00351549	1.14391	0.119297	n.i.	none
DDB_G0272196	DDB_G0272196	1.93793	3.13256e-05	0.799277	0.40518	1.4787	0.00335765	n.s.	contains one VWFA domain and one copine domain; copines are phospholipid-binding proteins
DDB_G0293470	cbfB	1.61809	0.0135001	0.932571	0.608712	1.84602	0.00875045	n.s.	similar to Dictyostelium cbfA; contains a jmjC domain
DDB_G0273247	DDB_G0273247	1.56292	0.00270592	1.23049	0.230724	1.92966	0.00350721	-1.48237	there is a second copy of this gene, DDB_G0273651
DDB_G0288697	DDB_G0288697	2.0209	0.00101635	-0.232344	0.999641	0.425525	0.762566	n.s.	none
DDB_G0280375	DDB_G0280375	3.81229	5.52304e-10	0.730761	0.537006	0.159807	0.869181	n.s.	none
DDB_G0269698	DDB_G0269698	3.96926	2.31665e-09	1.52311	0.542846	1.27251	0.374891	n.s.	contains a putative signal peptide and 8 transmembrane regions
DDB_G0270126	rasY	3.81589	9.25613e-07	1.77401	0.288894	3.21669	0.000956656	n.s.	none
DDB_G0268346	DDB_G0268346	2.87131	1.08318e-09	1.3448	0.77944	1.30089	0.424404	n.s.	member of the patatin family of glycoproteins, which are storage proteins but also possess lipase activity
DDB_G0268318	DDB_G0268318	2.62539	7.42016e-10	-1.27008	NA	-3.75906	NA	n.s.	none
DDB_G0283867	cprC	3.48951	5.89294e-14	-1.93881	0.909802	1.64746	0.617073	n.i.	none
DDB_G0282265	sgmC	1.34291	0.040857	0.531221	0.862828	1.00963	0.103319	n.s.	hydrolyze the phosphodiester bond in sphingomyelin to form ceramide
DDB_G0276607	hspG3	3.57915	5.08643e-07	-2.93559	0.0860131	1.05735	0.532949	n.i.	none
DDB_G0290793	rabN2	4.28477	0.0073792	-1.61046	NA	0.356938	NA	n.i.	none
DDB_G0281817	DDB_G0281817	5.06431	1.89923e-13	-3.0411	NA	-1.14027	NA	n.s.	none
DDB_G0277167	DDB_G0277167	4.34811	0.0012988	-0.122293	NA	-1.34396	NA	n.s.	none
DDB_G0278125	DDB_G0278125	1.23441	0.0451383	2.53807	5.47285e-08	2.64287	2.51201e-09	n.s.	none
DDB_G0269202	gdcA	4.52213	3.75167e-24	2.99778	2.90837e-16	3.91709	4.44996e-29	n.s.	none
DDB_G0283097	DDB_G0283097	3.90852	2.09024e-16	-1.0987	0.648696	-1.06564	0.33102	n.s.	none
DDB_G0275093	DDB_G0275093	2.05184	6.79274e-05	1.44389	0.00189663	2.5	3.99496e-11	n.s.	similar to ubiquitin in the N-terminal region; contains one von Willebrand factor (vWF) type A domain
DDB_G0268154	DDB_G0268154	1.13115	0.036042	1.08985	0.287663	1.35314	0.0425305	n.s.	none
DDB_G0277491	hspG12	3.82537	3.83597e-12	-3.81019	0.426173	1.01006	0.80981	n.s.	none
DDB_G0283197	DDB_G0283197	2.71079	0.00202277	-0.0969174	NA	3.18953	NA	n.s.	none
DDB_G0280429	DDB_G0280429	1.09249	0.047263	0.152295	0.999641	-0.459367	0.58403	n.s.	none
DDB_G0287297	p80	-1.67121	7.3326e-05	0.187768	0.999641	-0.735065	0.275075	n.s.	endosome / phagosome membrane protein; contains a putative signal peptide
DDB_G0282067	DDB_G0282067	2.12455	6.79461e-08	-0.457598	0.789035	-0.841728	0.0705367	n.s.	belongs to a family of zinc transporters that are integral membrane proteins, which are found to increase tolerance to divalent metal ions; contains 6 putative transmembrane domains
DDB_G0293202	DDB_G0293202	2.71648	3.31628e-12	-0.859094	0.802799	-1.77751	0.0454614	2.21053	has similarity to mammalian TNF receptor-associated factors 5 and 6 (TRAF5, TRAF6)
DDB_G0283199	DDB_G0283199	2.14652	4.34735e-06	1.48995	0.010651	2.48377	5.22465e-08	n.s.	none
DDB_G0273433	DDB_G0273433	1.29049	0.0149598	1.06239	0.0673004	2.17806	7.12121e-08	n.s.	there is a second copy of this gene, DDB_G0273509
DDB_G0268892	DDB_G0268892	3.18539	6.81155e-13	2.31265	4.05779e-05	3.33856	1.15153e-11	n.s.	contains a predicted signal peptide
DDB_G0269270	DDB_G0269270	2.36837	0.0107776	0.0926327	NA	-1.08755	0.623361	n.i.	highly conserved protein containing an alkyl hydroperoxide reductase/thiol specific antioxidant/mal allergen domain; identical to DDB_G0269256
DDB_G0289125	DDB_G0289125	2.7364	1.56084e-07	0.231726	0.999641	-0.0527066	0.983626	n.s.	none
DDB_G0286537	DDB_G0286537	2.85288	1.71916e-11	0.268389	0.999641	0.536289	0.513459	n.s.	none
DDB_G0272014	DDB_G0272014	-1.40908	0.0341941	-0.49698	0.921637	0.604375	0.4384	n.s.	belongs to the class-I pyridoxal-phosphate-dependent aminotransferase family; similar to human AADAT (kynurenine/alpha-aminoadipate aminotransferase) and S. cerevisiae ARO8 (aromatic amino acid aminotransferase)
DDB_G0277147	stkA	2.35153	0.000301017	1.30074	0.702415	3.17686	0.00182262	n.s.	transcription factor required for sporulation; expressed in prespore cells; has 18 amino acids between the two CX2C motifs
DDB_G0284685	mpi	1.34881	0.0337716	0.496256	0.878606	0.519075	0.481427	n.i.	catalyzes the reaction D-Mannose 6-phosphate <=> D-fructose 6-phosphate
DDB_G0277851	dymB	1.3637	0.0324852	0.413987	0.883352	-0.0618066	0.947356	n.s.	none
DDB_G0290427	DDB_G0290427	1.36837	0.00516236	0.154588	0.999641	0.609526	0.295467	n.i.	none
DDB_G0284951	vamp7A	1.13959	0.0280412	-0.245522	0.999641	-0.30792	0.678171	n.i.	member of the SNARE family (Soluble NSF Attachment Protein REceptor); localizes to endosome and interacts with syn7A
DDB_G0278503	DDB_G0278503	2.08953	0.000404022	-1.02041	0.851128	-1.84818	0.139729	n.i.	none
DDB_G0273289	DDB_G0273289	6.6389	1.11935e-47	2.5177	0.028212	7.63295	1.79276e-22	n.s.	no homologs in other organisms; there is a second copy of this gene, DDB_G0273785
DDB_G0288651	DDB_G0288651	1.97177	4.33136e-06	0.352327	0.983347	0.747167	0.22397	n.s.	member of the patatin family of glycoproteins, which are storage proteins but also possess lipase activity
DDB_G0279551	DDB_G0279551	-1.95678	0.0257827	0.506964	0.878606	1.78851	0.000515218	n.s.	none
DDB_G0281139	DDB_G0281139	2.13375	6.80615e-06	-0.00906325	0.999641	1.81986	0.000202351	n.s.	none
DDB_G0294567	DDB_G0294567	-2.52273	0.0224589	0.80747	NA	-1.3474	0.685855	n.i.	none
DDB_G0276839	DDB_G0276839	-1.77205	0.00363266	-0.236648	0.999641	-0.479296	0.650725	n.s.	none
DDB_G0289211	DDB_G0289211	3.76	5.83515e-18	3.1892	1.12543e-12	3.64844	1.76305e-17	n.s.	contains a central, large T4 RNA ligase, RnlA-like domain, a property shared by a related gene DDB_G0286041; similar to D. purpureum protein
DDB_G0283271	DDB_G0283271	-1.77355	0.000128027	-0.0107956	0.999641	-0.128019	0.882602	n.s.	contains an N-terminal DOMON domain as it occurs in dopamine beta-monooxygenases; the Dictyostelium protein is followed by a cytochrome b561 domain, which contains 5 putative transmembrane regions; in addition, the protein contains a putative signal peptide
DDB_G0282633	DDB_G0282633	1.96221	0.000119755	1.49826	0.0102373	1.79694	0.000242958	n.s.	conserved hypothetical multidomain protein
DDB_G0282631	DDB_G0282631	1.35706	0.0084436	1.59635	0.468675	1.22569	0.382912	n.s.	none
DDB_G0276587	hspG4	2.43572	0.000276715	-3.86161	0.0754224	1.00453	0.61493	n.i.	none
DDB_G0293674	DDB_G0293674	2.78455	1.1232e-07	-3.65227	0.373779	2.84162	0.315502	n.s.	none
DDB_G0287015	DDB_G0287015	1.61294	0.000259997	0.512093	0.74727	0.453439	0.452538	n.i.	contains two transmembrane domains
DDB_G0270276	DDB_G0270276	1.53271	0.0498243	1.2644	0.356535	4.31313	1.08845e-10	n.i.	none
DDB_G0289505	act24	2.35718	1.70348e-06	-0.233982	0.999641	-0.31445	0.793556	n.i.	has 80% identity with human beta-actin (SwissProt P60709)
DDB_G0277731	DDB_G0277731	4.45661	6.98691e-28	1.39157	0.110601	0.640679	0.480316	n.s.	conserved Dictyostelium protein; contains a putative N-terminal signal sequence, a C-terminal anchoring transmembrane domain and one EGF-like domain
DDB_G0269630	iliI	1.14073	0.0215051	1.64457	0.000279833	3.04453	5.70899e-16	1.7921	belongs to a superfamily of metalloenzymes; induced by Legionella pneumophila infection
DDB_G0269458	ubqJ	4.51248	3.37092e-16	2.05234	0.00287595	1.71388	0.00836316	n.s.	none
DDB_G0285889	DDB_G0285889	1.29856	0.0148286	0.0736204	0.999641	-0.435476	0.668963	n.s.	none
DDB_G0284401	DDB_G0284401	-1.39464	0.0261127	0.204814	0.999641	-0.674259	0.506429	n.i.	conserved hypothetical Dictyostelium protein; similar to bacterial ubiquinone/menaquinone biosynthesis methyltransferase ubiE
DDB_G0279817	DDB_G0279817	4.8331	0.00352791	-0.448568	NA	0.345905	NA	n.s.	none
DDB_G0280615	DDB_G0280615	2.70779	3.86038e-07	0.130718	NA	-1.15149	NA	n.i.	none
DDB_G0290971	DDB_G0290971	1.90322	6.22718e-06	0.365909	0.957423	1.26587	0.00838323	n.s.	none
DDB_G0284917	DDB_G0284917	2.94448	8.27284e-16	-0.0056627	0.999641	-0.260126	0.727662	n.s.	none
DDB_G0275033	DDB_G0275033	2.62835	1.50626e-09	-3.38739	0.249801	-3.81542	0.0798232	n.s.	conserved hypothetical Dictyostelium protein
DDB_G0279493	DDB_G0279493	3.30779	2.50469e-12	-0.275378	0.999641	-1.0055	0.547528	1.13573	none
DDB_G0267468	adprt4	1.49016	0.00115406	1.7828	0.00145761	2.69752	8.40947e-09	n.i.	catalyzes ADP-ribosylation, a posttranslational protein modification in which the ADP-ribose moiety of NAD is transferred onto specific amino acid side chains of cell surface, secreted, cytosolic or nuclear proteins
DDB_G0285341	DDB_G0285341	1.36359	0.00229372	0.301857	0.999641	0.772147	0.372575	n.s.	none
DDB_G0292144	DDB_G0292144	2.37578	0.000266381	1.32618	NA	0.522482	0.849485	n.s.	none
DDB_G0288619	DDB_G0288619	2.24096	1.41806e-07	0.0942535	0.999641	1.23614	0.0085649	n.s.	none
DDB_G0279143	DDB_G0279143	1.87023	0.00427757	1.1179	0.587635	0.281018	0.85432	n.s.	none
DDB_G0270212	DDB_G0270212	1.75266	0.000296678	-1.21744	0.0856972	-0.149103	0.881056	n.i.	similar to discoidin I; almost identical to its downstream gene DD7-1
DDB_G0289521	srsA	-2.74476	5.7052e-07	0.64059	0.999641	1.70928	0.642288	n.i.	immidiate-early gene, expressed immidiately after nutrition removal, involved in starvation response, development and spore differentiation; there are two transcripts of this gene; both contain a putative transmembrane domain
DDB_G0270214	DD7-1	1.42905	0.00259582	-2.08639	1.20059e-05	-0.619039	0.305166	n.i.	similar to discoidin I; involved in O-glycosylation as identified by mRNA differential display; almost identical to its upstream gene DDB_G0270212
DDB_G0267914	DDB_G0267914	2.58714	3.18147e-09	0.643383	0.874459	1.12403	0.154369	n.s.	none
DDB_G0269470	mcfF	-1.24982	0.00830897	-0.854416	0.423287	-2.37367	3.44372e-06	n.s.	ortholog of H. sapiens SLC25A28 and D. reiro SLC25A37, involved in iron transport across the mitochondrial membrane
DDB_G0268878	DDB_G0268878	-2.78724	1.16616e-11	-0.875385	0.213207	-5.91044	9.0658e-52	n.s.	none
DDB_G0268874	DDB_G0268874	3.98746	2.12477e-14	1.23373	0.781341	3.49854	0.00102731	n.s.	none
DDB_G0280585	ubqK	2.59833	3.72902e-08	1.67113	0.000403444	1.57879	0.000274985	n.s.	none
DDB_G0276875	hspG5	5.06896	3.64658e-17	-3.77799	0.49568	1.76275	0.653898	n.s.	none
DDB_G0290959	chtC	2.04733	5.14504e-05	-1.2762	0.355329	-0.772363	0.460166	2.02697	similar to heat shock protein Hsp20 domain-containing protein; but does not contain a Hsp20 domain
DDB_G0281983	tmem50	1.76702	0.000115896	0.335195	0.991938	0.344528	0.658191	n.s.	conserved hypothetical protein; contains a signal peptide and three transmembrane domains
DDB_G0274655	DDB_G0274655	4.31938	2.55288e-18	-1.51373	0.230449	-0.309417	0.826148	n.s.	none
DDB_G0288001	DDB_G0288001	1.90743	0.000150776	1.77375	0.0185997	1.62083	0.0166074	n.s.	related to fatty acyl-CoA synthetase; catalyzes the reaction ATP + a long-chain carboxylic acid + CoA = AMP + diphosphate + an acyl-CoA; mediates the retrieval of fatty acids from endosomes to the cytoplasm
DDB_G0292250	sqrdl	-1.26635	0.00683503	-0.703475	0.270591	-1.41196	0.000150722	n.s.	ortholog of the conserved sulfide quinone reductase-like protein; in S. pombe, this oxidoreductase is involved in mitochondrial sulfide oxidation
DDB_G0274223	DDB_G0274223	-1.10438	0.0478836	1.51039	0.0273062	-3.70435	2.56031e-09	-2.18	catalyzes the reaction RX + glutathione = HX + R-S-glutathione
DDB_G0278865	DDB_G0278865	2.63935	1.62419e-08	-0.236843	0.999641	1.13605	0.0503858	n.s.	none
DDB_G0282365	rac1C	1.94164	0.0125536	1.40566	0.0501018	0.666715	0.381364	n.i.	none
DDB_G0289207	tmcB	2.53369	5.8718e-07	0.551059	0.88142	1.80435	0.00157328	n.s.	contains two HAT (half a TPR) repeats and 13 predicted transmembrane domains; involved in macrocyst formation
DDB_G0267702	DDB_G0267702	2.40063	0.0289848	NA	NA	NA	NA	n.s.	none
DDB_G0276097	DDB_G0276097	2.19854	9.39736e-08	-0.999591	0.95121	-1.87702	0.264722	n.s.	contains two transmembrane domains
DDB_G0286129	DDB_G0286129	2.4744	0.000682037	0.3456	NA	0.784699	0.797978	n.s.	similar to mammalian F-box/WD repeat-containing protein 7, which is part to the E3 ubiquitin-protein ligase complex
DDB_G0277329	DDB_G0277329	1.67195	0.014633	1.59697	0.00546946	1.82903	0.000223021	n.s.	N-terminal region similar to ubiquitin; central region contains one von Willebrand factor (vWF) type A domain; C-terminal region similar to P-loop containing nucleoside triphosphate hydrolases
DDB_G0286893	act29	2.3693	5.06479e-05	0.983527	0.689185	0.770714	0.493716	-1.28115	has 56% identity with human beta-actin (SwissProt P60709)
DDB_G0282867	DDB_G0282867	1.60362	0.000364273	2.16317	8.03842e-06	3.27196	1.08995e-14	n.s.	none
DDB_G0280937	DDB_G0280937_ps	2.39131	0.00505343	1.72761	NA	-0.693979	NA	n.s.	putative pseudogene; similar to D. discoideum gene DDB_G0272769
DDB_G0267758	DDB_G0267758	1.67868	0.0043794	0.561504	0.964407	2.68046	7.79893e-05	n.s.	small Dictyostelium gene family
DDB_G0269670	DDB_G0269670	1.32533	0.00286919	-0.632417	0.776949	-0.984542	0.133857	n.s.	contains one C2 domain, which is thought to be involved in calcium-dependent phospholipid binding; also contains one WW domain, which is involved in protein binding
DDB_G0284571	gacC	1.19867	0.0496372	0.488212	0.78721	0.780042	0.126252	n.s.	none
DDB_G0270490	DDB_G0270490	5.65226	3.25271e-26	-2.71181	NA	-1.15899	0.669579	n.s.	none
DDB_G0283777	DDB_G0283777	3.39283	2.0348e-10	1.21215	0.839367	1.94065	0.165417	1.70832	none
DDB_G0275209	cnrD	2.16978	6.09006e-06	1.41303	0.0232213	1.73474	0.000752781	n.s.	identified as a suppressor of smlA null mutant cnr4; contains a Cue domain, which may be involved in binding ubiquitin-conjugating enzymes
DDB_G0291462	DDB_G0291462	-1.67404	0.0429252	-1.18097	0.874108	-3.12439	0.0528773	n.s.	none
DDB_G0291772	DDB_G0291772	1.79131	0.0402099	-0.0898227	0.999641	-0.870465	0.646519	n.s.	none
DDB_G0281219	DDB_G0281219	1.95686	0.000273093	0.44693	0.843517	-0.635115	0.256705	n.s.	none
DDB_G0291770	DDB_G0291770_ps	1.22672	0.0224589	-2.52709	0.807177	4.71097	0.0577708	n.i.	putative pseudogene; similar to D. discoideum gene DDB_G0291740
DDB_G0275079	hspG1	4.73381	1.5337e-13	-4.75865	0.132871	2.70729	0.108832	n.i.	none
DDB_G0270006	jcdI	1.33886	0.0200838	0.207774	0.999641	0.9015	0.112531	n.s.	similar to the human JMJD6, which is required for organ differentiation during embryogenesis
DDB_G0274245	DDB_G0274245	3.72517	0.0202818	1.25721	NA	0.257245	NA	n.s.	none
DDB_G0293008	cpnA	1.64706	0.00759261	1.14781	0.0199176	0.708444	0.149736	n.s.	Ca(2+)-dependent phospholipid-binding protein; contains two C2 domains and a VWFA domain.
DDB_G0267894	DDB_G0267894	1.86936	7.72582e-06	-0.0298204	0.999641	-0.693977	0.39203	n.s.	none
DDB_G0271758	rccA	1.99774	0.0172442	0.696366	NA	-0.455415	NA	n.s.	none
DDB_G0267394	vps46	1.51043	0.000477258	-0.0476144	0.999641	0.443587	0.451215	n.s.	highly similar to S. cerevisiae DID2 and H. sapiens CHMP1 proteins involved in the vacuolar protein-sorting (Vps) pathway
DDB_G0277205	DDB_G0277205	1.52015	0.00116779	-0.263007	0.999641	-0.611142	0.357687	n.s.	none
DDB_G0277203	DDB_G0277203	-1.78669	1.84902e-05	0.0645799	0.999641	-3.61141	7.69448e-08	1.28738	members of the NAD-dependent epimerase/dehydratase family use nucleotide-sugar substrates for a variety of chemical reactions
DDB_G0286555	racA	1.3854	0.0155686	0.98891	0.0863556	0.876301	0.0723344	n.s.	RhoBTB subfamily protein, which have a unique domain architecture, composed of a N-terminal GTPase domain, two bric a brac domains (BTB, and a conserved C-terminal domain; there are orthoolgs in several eukaryotes including mammals, but are absent from fungi and plants; in Dictyostelium, appears to be involved in the regulation of the actin cytoskeleton
DDB_G0292188	DDB_G0292188	2.24834	1.23003e-08	-0.750169	0.89932	-1.82198	0.0468518	n.s.	conserved hypothetical Dictyostelium protein; contains a weak von Willebrand factor, type A domain
DDB_G0289029	DDB_G0289029	2.78273	1.91475e-13	0.00344363	0.999641	0.894813	0.230186	n.s.	conserved protein, similar to S. cerevisiae IST1 (Increased Sodium Tolerance) that plays a role in the endosome to vacuole transport via the multivesicular body sorting pathway; contains an N-terminal DUF292 domain
DDB_G0285791	DDB_G0285791	3.4596	3.14501e-09	-2.53959	NA	-2.52803	NA	n.i.	none
DDB_G0291758	DDB_G0291758	3.42214	2.02862e-15	-0.854008	0.77944	0.0556761	0.970316	n.i.	none
DDB_G0276347	DDB_G0276347	2.08239	2.03555e-06	0.285754	0.999641	0.217747	0.875935	n.s.	none
DDB_G0274613	DDB_G0274613	1.58089	0.0058233	0.329354	0.999641	0.826212	0.212722	n.s.	kinase domain similar to mitogen-activated protein kinases; does not contain the consensus sequences known to be required for kinase function; contains a RING zinc finger domain
DDB_G0280013	hspM	4.22925	1.99883e-11	-4.12389	0.260055	2.02361	0.252194	n.i.
DDB_G0286911	DDB_G0286911	4.50965	1.22058e-32	0.0659935	0.999641	-0.196733	0.897306	n.i.	none
DDB_G0290761	sid1	1.1866	0.0426964	0.987981	0.643139	1.26687	0.154369	n.s.	ortholog of C. elegans sid1, that enables passive cellular uptake of dsRNA; contains 10 transmembrane domains
DDB_G0291798	DDB_G0291798	1.47082	0.00064161	-0.229371	0.999641	-0.701759	0.177827	n.s.	none
DDB_G0282143	hatB	1.71226	0.000300176	0.15858	0.999641	-0.622923	0.419393	n.s.	histidine-rich, pH-dependent, actin binding protein; N-terminal myristoylation
DDB_G0268192	DDB_G0268192	1.87464	0.0496372	0.634774	0.987909	-1.59325	0.191427	n.i.	highly conserved protein containing an alkyl hydroperoxide reductase/thiol specific antioxidant/mal allergen domain
DDB_G0287671	DDB_G0287671	4.37162	3.3721e-15	2.09823	0.0734192	3.13358	0.00031811	n.s.	none
DDB_G0278613	DDB_G0278613	2.14043	9.9942e-05	0.42402	0.921486	0.403305	0.582317	n.s.	N-terminus similar to matrilin, a vertebrate extracellular matrix protein expressed in cartilage; C-terminus similar to other Dictyostelium EGF repeat-containing proteins; contains 11 EGF (epidermal growth factor) repeats
DDB_G0294569	DDB_G0294569	5.39306	0.000134337	1.50957	NA	1.50098	NA	n.i.	none
DDB_G0292814	symA	-2.25581	0.0134792	-0.745657	NA	1.41317	NA	n.i.	none
DDB_G0291928	ubqI	1.58046	0.00202277	1.04787	0.345254	1.21011	0.0830411	n.i.	none
DDB_G0285769	DDB_G0285769	3.45963	2.43221e-09	0.811428	NA	-0.199473	NA	n.i.	highly similar to agglutinin domain-containing protein DDB_G0285617(80% identity); contains a signal peptide
DDB_G0275735	rbdA	2.3786	0.00139077	0.0402967	0.999641	0.561334	0.75651	n.s.	none
DDB_G0276285	DDB_G0276285	2.03597	7.57932e-05	0.775785	0.907372	2.73382	0.00114963	n.s.	none
DDB_G0280201	DDB_G0280201	1.19319	0.0183991	2.61766	0.769796	0.957538	0.816267	n.i.	conserved hypothetical protein; contains a putative signal peptide
DDB_G0269256	DDB_G0269256	2.9586	0.0055383	0.596243	0.999641	-0.702457	0.723415	n.i.	highly conserved protein containing an alkyl hydroperoxide reductase/thiol specific antioxidant/mal allergen domain; identical to DDB_G0269270
DDB_G0290087	vps2A	2.27647	1.31445e-08	0.0330005	0.999641	0.788707	0.217229	n.i.	putative ortholog of human CHMP2A (Chromatin Modifying Protein 2A) and yeast DID4 (Doa4-Independent Degradation), component of the ESCRT-III complex (endosomal sorting complex required for transport)
DDB_G0276361	DDB_G0276361	1.51582	0.000259997	0.25284	0.999641	1.19066	0.12215	n.s.	none
DDB_G0284999	DDB_G0284999	3.243	1.17298e-10	0.760755	0.999641	3.0869	0.158185	n.i.	conserved hypothetical 277 aa Dictyostelium protein
DDB_G0276949	hspG6	2.81537	1.06914e-06	-4.28691	0.312445	-0.0129579	0.998576	n.i.	none
DDB_G0292996	rasD	2.19595	0.0363295	4.1209	5.03606e-09	3.31942	2.5583e-06	n.i.	expressed in pstAO cells and in upper cup during culmination
DDB_G0292986	abcG10	-1.42781	0.00538615	1.33396	0.00421164	1.08537	0.0145075	n.s.	full transporter, consisting of two ABC domains and two transmembrane domains
DDB_G0271240	utp18	-0.720401	0.740544	-1.90334	0.00523647	-1.66767	0.00768534	n.s.	putative U3 snoRNP protein; ortholog of H. sapiens and S. cerevisiae UTP18
DDB_G0290029	DDB_G0290029	0.0190842	0.999718	-1.44792	0.0113908	0.184237	0.836604	1.11798	similar to Apis mellifera predicted protein XM_394767.1
DDB_G0277381	cpras1	0.997874	0.171123	1.14193	0.0188008	1.23699	0.00300061	n.s.	contains a type A von Willebrand factor (VWFA) domain followed by circularly permuted GTPase domain with the conserved motifs G1-G2 lying downstream of the G3-G4-G5 motifs
DDB_G0283833	DDB_G0283833	1.96047	0.181068	2.93691	2.18391e-09	2.82591	2.47066e-09	n.s.	none
DDB_G0272494	DDB_G0272494	-0.39899	0.999718	-1.51581	0.0153183	-2.56759	4.47362e-07	n.s.	none
DDB_G0283425	DDB_G0283425	0.93633	0.765614	2.10746	0.00065785	2.47765	4.36215e-06	n.i.	none
DDB_G0283421	DDB_G0283421	0.769996	NA	6.91953	0.000690962	9.3802	6.45753e-08	n.i.	none
DDB_G0288253	fslF	-0.645658	0.999718	3.49149	7.07901e-06	4.50562	6.10483e-11	n.s.	similar to G-protein-coupled receptors; weak frizzled cystein-rich domain; predicted to have 7 transmembrane domains and a putative signal peptide
DDB_G0268566	DDB_G0268566	0.935605	0.786864	2.1092	0.000690962	2.71937	3.32514e-07	n.s.	none
DDB_G0285489	DDB_G0285489	-0.119787	0.999718	-1.94076	0.00949829	-1.19099	0.102047	n.s.	similar to human TRMT112, S. cerevisiae TRM112 (multifunctional methyltransferase subunit TRM112)
DDB_G0292536	DDB_G0292536_ps	3.06147	NA	5.42613	0.0375392	7.13522	0.000437693	n.i.	putative pseudogene; carbohydrate/purine kinase domain-containing protein; similar to DDB_G0292440
DDB_G0281909	DDB_G0281909	-0.206698	0.999718	-1.1129	0.0208107	-1.31288	0.0011227	n.s.	none
DDB_G0287717	iliD	0.04178	0.999718	1.93217	0.000890271	3.40651	1.44218e-12	n.s.	similar to hypothetical fungi proteins; induced by Legionella pneumophila infection
DDB_G0276545	DDB_G0276545	-0.68446	0.999718	5.7248	0.0164911	7.9842	2.43285e-05	n.s.	none
DDB_G0282817	patB	-0.210613	0.999718	-1.91503	0.000348267	-2.57389	2.48751e-08	n.s.	plasma membrane P-type H+-ATPase that is necessary for survival in acidic environments
DDB_G0269312	DDB_G0269312	-0.704672	0.798878	-1.55589	0.0431448	-1.20015	0.0826379	n.s.	ortholog of S. cerevisiae ESF1, a nucleolar protein involved in pre-rRNA processing
DDB_G0285637	glb2	0.44927	0.999718	2.25744	0.00827324	3.54764	1.39946e-07	n.s.	belongs to glycoside hydrolase family 35; hydrolyzes terminal non-reducing beta-D-galactose residues in beta-D-galactoside; has a signal peptide
DDB_G0290181	DDB_G0290181	-0.812008	0.519246	-1.84714	0.00406262	-0.769642	0.275846	n.s.	similar to S.cerevisiae RRP5 and animal PDCD11 (Programmed cell death protein 11)
DDB_G0288159	DDB_G0288159	-0.402079	0.999718	1.50077	0.0437392	2.31722	3.23572e-05	n.i.	none
DDB_G0279903	wdr12	-0.531598	0.999718	-1.8902	0.00268884	-1.40724	0.0206027	1.51	ortholog of mammalian wdr12 and yeast YTM1
DDB_G0284195	DDB_G0284195	0.42474	0.999718	2.00185	5.11967e-05	2.39704	4.46516e-08	n.s.	none
DDB_G0292014	psiK	-0.35752	0.999718	2.5764	0.0224543	2.17909	0.0367052	n.s.	contains a PA14 (anthrax protection antigen) domain and 6 Dictyostelium (CTDC) repeats
DDB_G0281431	DDB_G0281431	0.66955	0.703348	1.27793	0.0220262	2.49337	2.54829e-09	n.s.	none
DDB_G0283877	dus2l	0.178853	0.999718	1.71947	0.000191056	2.88582	7.93752e-14	n.s.	ortholog of S. cerevisiae SMM1 and the animal DUS2L; catalyzes the synthesis of dihydrouridine, a modified base found in the D-loop of tRNAs
DDB_G0284457	DDB_G0284457	0.85777	0.687156	2.34271	4.05779e-05	3.06669	8.42876e-10	n.s.	none
DDB_G0275759	rpa1	-0.506997	0.999718	-1.94369	0.00457641	-0.930298	0.21469	n.s.	component of the RNA polymerase I complex; ortholog of S. cerevisiae RPA190
DDB_G0284239	DDB_G0284239	0.202459	NA	6.5631	0.00166635	9.21986	1.18117e-07	n.s.	CAZy family GH9; catalyzes the hydrolysis of glucosidic linkages
DDB_G0280733	DDB_G0280733	0.932501	0.409562	3.96259	0.00594542	2.51057	0.0875218	n.i.	none
DDB_G0280579	DDB_G0280579	-0.474272	0.999718	-1.72451	0.0375181	-1.08263	0.158489	n.i.	none
DDB_G0280267	allC	0.0304117	0.999718	1.11089	0.0377716	1.21995	0.00630927	n.s.	catalyzes the reaction allantoate + H2O <=> (S)-ureidoglycolate + urea in allantoin degradation
DDB_G0275111	DDB_G0275111	-0.516243	0.928348	-1.24124	0.0160349	1.15671	0.0117201	n.s.	contains a predicted signal peptide; conserved in Dictyostelium and Polysphondylium
DDB_G0282731	polA2	0.420694	0.999718	1.2862	0.0359403	1.33011	0.0104106	n.s.	ortholog of the B subunit of the DNA polymerase alpha-primase complex, required for the initiation of DNA replication
DDB_G0278331	DDB_G0278331	-0.462166	0.999718	-1.95714	0.00158047	-1.52077	0.0103198	n.s.	none
DDB_G0273175	cf50-1	-0.156209	0.999718	2.59252	3.09133e-08	0.469484	0.506429	n.s.	component of the counting factor complex, which includes CF60, CF50, CF45-1, and CtnA (countin); there is a second copy of this gene, cf50-2
DDB_G0281679	DDB_G0281679	1.03448	0.12594	1.89092	0.00116537	2.04593	7.88749e-05	n.s.	none
DDB_G0286287	DDB_G0286287	-0.118101	0.999718	3.43166	0.00135161	3.95773	2.09064e-05	n.s.	none
DDB_G0290555	DDB_G0290555	-0.626355	0.913743	-2.05938	0.0199176	-0.49866	0.656517	1.07158	none
DDB_G0281611	DDB_G0281611	-0.292834	0.999718	2.40444	4.68275e-06	2.04658	4.75986e-05	n.i.	none
DDB_G0287909	DDB_G0287909	0.0542114	0.999718	1.31618	0.0499069	1.89556	0.000200271	n.s.	none
DDB_G0274521	rrs1	-0.39625	0.999718	-2.13333	0.00215354	-1.67875	0.0115636	1.63752	ortholog of S. cerevisiae RRS1, an essential protein that binds ribosomal protein L11 and is required for nuclear export of the 60S pre-ribosomal subunit during ribosome biogenesis; mouse homolog shows altered expression in Huntington's disease model mice
DDB_G0272781	pmmB	-0.632307	0.681927	-1.88643	0.0163699	-2.48045	0.000145295	n.s.	catalyzes the reaction alpha-D-mannose 1-phosphate <=> D-mannose 6-phosphate
DDB_G0272789	rlp24	-0.0195767	0.999718	-1.36328	0.0433708	-0.742868	0.275086	1.53164	ortholog of the mammalian C15orf15 gene and the S. cerevisiae RLP24 protein, which is involved in the biogenesis of the 60S ribosomal subunit and at the end of biogenesis is likely to be exchanged for its ribosomal homologue, rpl24
DDB_G0271490	melA	-0.259089	0.999718	1.30803	0.00313822	0.506053	0.332425	n.s.	conserved protein; alpha-galactosidase (melibiase) catalyses the hydrolysis of melibiose into galactose and glucose
DDB_G0279371	utp14	-0.90473	0.467911	-2.0898	0.0091237	-1.62222	0.0298536	n.s.	component of the small subunit (SSU) processome containing the U3 snoRNA involved in processing of pre-18S rRNA
DDB_G0277425	DDB_G0277425	-1.79349	NA	2.67966	0.0492874	2.83812	0.0119847	n.i.	conserved hypothetical 278 aa Dictyostelium protein
DDB_G0277421	DDB_G0277421	-0.00517141	0.999718	3.18326	0.000671226	4.24164	8.99252e-08	n.i.	conserved hypothetical 278 aa Dictyostelium protein
DDB_G0284621	pwp2	-0.741897	0.653605	-2.05186	0.031805	-1.83431	0.0298861	n.s.	ortholog of H. sapiens and S. cerevisiae PWP2 involved in the endonucleolytic cleavage of the 35 S rRNA precursor
DDB_G0281695	DDB_G0281695	0.988204	0.355658	2.06032	0.000191056	3.76885	9.4069e-17	n.s.	none
DDB_G0269048	DDB_G0269048	-0.381914	0.999718	-1.86779	0.0130152	-0.891612	0.27338	n.s.	none
DDB_G0278761	DDB_G0278761	0.1911	0.999718	1.38357	0.00293908	0.263826	0.698645	n.s.	highly similar to H. sapiens ZNFX1
DDB_G0270156	DDB_G0270156	-0.716775	0.725591	-1.8893	0.0378648	-1.93969	0.012158	n.s.	none
DDB_G0270152	maspS	-0.309566	0.999718	-1.49696	0.000665077	-2.07967	3.75931e-08	n.s.	catalyzes the reaction ATP + L-aspartate + tRNAAsp = AMP + diphosphate + L-aspartyl-tRNAAsp
DDB_G0280797	DDB_G0280797	-0.531664	0.999718	-1.50559	0.00423285	-1.32187	0.00683245	n.s.	similar to S. cerevisiae RRP12 (ribosomal RNA-processing protein 12); contains one NUC173 domain and an armadillo repeat region
DDB_G0302676	DDB_G0302676	-0.286802	0.999718	-1.96792	0.0280188	-1.56347	0.0525734	n.i.	none
DDB_G0277137	DDB_G0277137	-0.0579027	0.999718	1.78754	0.0130152	2.15776	0.000325555	n.s.	conserved protein, ortholog of mouse adult male hypothalamus cDNA clone:A230106L22
DDB_G0271306	nmd3	-0.452373	0.999718	-1.47055	0.0210724	-0.733815	0.277217	n.s.	conserved NMD3 protein, which in S. cerevisiae is involved in the nuclear export of the large ribosomal subunit
DDB_G0275519	DDB_G0275519	1.12198	0.157851	-1.45763	0.0130108	-0.285902	0.729737	n.s.	none
DDB_G0288945	DDB_G0288945	0.558156	NA	8.17585	1.34759e-05	10.5295	3.19174e-10	n.i.	none
DDB_G0270958	DDB_G0270958	-0.794893	0.562038	-1.91119	0.0187723	-4.6294	6.69451e-10	n.i.	none
DDB_G0280323	DDB_G0280323	0.45545	NA	2.73928	0.0194044	1.40169	0.267027	n.i.	contains no functional domains and is not similar to any other protein
DDB_G0280147	ddx47	-0.499058	0.999718	-1.8808	0.00222776	-1.10017	0.081458	n.s.	ortholog of H. sapiens DDX47 and S. cerevisiae RRP3 (Ribosomal RNA Processing 3)
DDB_G0269060	DDB_G0269060	1.42133	0.084222	1.78011	0.0218249	2.00732	0.00217709	n.s.	none
DDB_G0269398	DDB_G0269398	1.17068	0.22678	2.36928	0.00063899	3.20452	5.27252e-08	n.s.	none
DDB_G0274489	DDB_G0274489	1.23787	0.208594	1.38151	0.0275523	2.92677	1.75872e-10	n.s.	none
DDB_G0274481	DDB_G0274481	0.172705	0.999718	2.96596	0.0275523	1.83425	0.166867	n.s.	similar to mammalian XPR1, which may confer susceptibility to infection with murine leukaemia viruses; also similar to yeast SYG1, a G-protein associated signal transduction protein, and plant PHO1, that may be involved in phosphate transport
DDB_G0283149	cotD	0.229275	0.999718	2.88173	1.13085e-06	6.03466	4.02298e-32	n.s.	none
DDB_G0294629	DDB_G0294629	-0.502357	0.999058	-2.23678	0.00053435	-1.11248	0.100783	n.s.	none
DDB_G0281703	nedd8l1	1.38564	0.720182	2.92937	0.0027486	4.37065	4.07299e-08	n.i.	very similar to the conserved NEDD8 (neddylin) protein, however, the C-terminus is extended and lacks the conserved cleavage site
DDB_G0281841	ddx24	-0.875023	0.485218	-1.76538	0.018297	-1.95968	0.00211408	n.s.	ortholog of H. sapiens DDX24 and S. cerevisiae MAK5 (MAintenance of Killer 5)
DDB_G0283555	DDB_G0283555	0.516477	0.999718	6.85076	3.20716e-10	8.25698	6.74076e-16	n.s.	contains Dictyostelium spore coat protein N-terminal domain and 7 follistatin-like domains; similar to spore coat proteins CotA, CotB, and CotD; expressed in prespore cells
DDB_G0283557	DDB_G0283557	0.749456	0.659328	2.28537	1.4039e-09	3.52367	1.77268e-24	n.s.	none
DDB_G0275981	DDB_G0275981	1.07819	0.2225	1.72005	1.05226e-05	2.44149	1.46345e-12	-1.212	contains no functional domains and is not similar to any other protein
DDB_G0287889	DDB_G0287889	-0.197992	0.999718	-2.3466	0.000846725	-2.38662	0.000174395	1.15522	none
DDB_G0273277	DDB_G0273277	-0.95452	0.999718	1.98182	0.0148743	3.30187	1.95098e-07	n.s.	there is a second copy of this gene, DDB_G0273829
DDB_G0276189	DDB_G0276189	-0.462803	0.999718	-1.39698	0.0292415	-1.00978	0.0879527	n.s.	none
DDB_G0287513	jcdG	-0.928779	0.202045	-1.8167	0.00197677	-1.29905	0.0240592	1.05	conserved protein; similar to H. sapiens C14orf169
DDB_G0281711	ddx27	-0.729452	0.676731	-1.75523	0.00996565	-1.77072	0.00312918	n.s.	ortholog of H. sapiens DDX27 and S. cerevisiae DRS1 (Deficiency of Ribosomal Subunits 1)
DDB_G0284763	DDB_G0284763	1.41674	0.180688	3.34131	0.00594542	6.89418	9.6355e-14	n.s.	none
DDB_G0292328	iliM	-0.11634	0.999718	1.25101	0.0214828	2.42825	3.72109e-09	n.s.	similar to bacterial aromatic-ring hydroxylases and fungal monooxygenases; induced by Legionella pneumophila infection
DDB_G0273405	DDB_G0273405_ps	0.132945	0.999718	1.73053	0.0333465	2.76472	7.76327e-06	n.s.	putative pseudogene; similar to coactosin, contains an ADF (actin depolymerisation factor/cofilin-like) domain; there is a second copy of this gene, DDB_G0273569_ps
DDB_G0288565	bysl	-0.431686	0.999718	-1.49865	0.0319371	-1.08753	0.0940724	1.10496	conserved protein; in H. sapiens required for processing of 20S pre-rRNA precursor and biogenesis of 40S ribosomal subunits and possibly for trophinin-dependent regulation of cell adhesion
DDB_G0275559	DDB_G0275559	-0.297434	0.999718	1.73164	0.0208481	3.22179	1.83622e-08	-1.40544	underexpressed in gskA-and zakA-null mutants
DDB_G0286091	DDB_G0286091	0.349903	0.999718	2.22702	0.000487381	3.01708	2.67668e-08	n.s.	none
DDB_G0293504	DDB_G0293504	0.518562	0.982022	1.3681	0.00316381	2.1534	1.45245e-08	n.s.	belongs to the nucleotidyltransferase superfamily; contains one poly A polymerase head domain
DDB_G0291330	kctd9	0.851734	0.514492	1.48845	0.00222643	1.1304	0.0167781	n.s.	highly similar to vertebrate potassium channel tetramerization domain-containing proteins; contains four pentapeptide repeats and a doublecourtin domain; enriched in gametes
DDB_G0292538	gtpbp1	0.686375	0.540794	1.2073	0.0304982	1.02118	0.0422641	n.s.	ortholog of the mammalian GTPBP1 and very similar to GTPBP2; contains a translation elongation factor EFTu/EF1A, domain 2 and C-terminal domain
DDB_G0270130	DDB_G0270130	0.503598	0.989578	1.50994	0.00115991	2.56882	2.00487e-11	n.s.	none
DDB_G0269688	sdad1	-0.535865	0.981304	-2.52184	0.00287595	-2.01476	0.0119847	n.s.	conserved protein, in S.cerevisiae required for 60S pre-ribosomal subunits export to the cytoplasm
DDB_G0269972	sas10	-0.584184	0.971258	-1.77501	0.0173508	-1.5448	0.0223477	n.s.	component of the small subunit (SSU) processome containing the U3 snoRNA involved in processing of pre-18S rRNA
DDB_G0274935	DDB_G0274935	0.245418	0.999718	2.53016	0.00596505	2.46369	0.0030152	n.s.	none
DDB_G0271060	DDB_G0271060	0.602849	NA	3.38933	0.0375181	5.19839	2.18885e-05	n.s.	none
DDB_G0293212	DDB_G0293212	0.81197	0.616191	1.27033	0.0402492	2.08547	6.24789e-06	n.s.	none
DDB_G0271354	DDB_G0271354	0.0582381	NA	4.17123	0.0246219	5.75109	9.32454e-05	n.i.	none
DDB_G0281283	DDB_G0281283	0.0200836	0.999718	1.29318	0.00856983	1.07994	0.018729	n.s.	none
DDB_G0293412	DDB_G0293412	-0.615959	0.849469	-1.56582	0.0432062	-1.28588	0.0622801	n.s.	none
DDB_G0282623	wdr3	-0.744449	0.697229	-1.80487	0.0348854	-1.51407	0.0479788	n.s.	ortholog of H. sapiens WDR3 and S. cerevisiae DIP2
DDB_G0286849	DDB_G0286849	-0.140245	0.999718	2.3153	0.0420224	2.20818	0.0247799	n.i.	similar to bacterial short-chain dehydrogenase/reductase family proteins, and human RDH8 (retinol dehydrogenase 8)
DDB_G0286271	DDB_G0286271	0.800932	0.494436	1.36801	0.0055558	1.85717	6.12967e-06	n.s.	none
DDB_G0284759	psiM	-0.356585	0.999718	1.99339	0.00405935	2.86188	4.85378e-07	n.s.	contains a signal peptide, a PA14 domain, and 4 Dictyostelium (slime mold) repeats; enriched in gametes
DDB_G0284383	DDB_G0284383	-0.674409	0.808834	-2.54495	0.000403444	-2.47526	0.000149657	n.s.	none
DDB_G0269892	DDB_G0269892	0.237119	0.999718	1.19022	0.0136168	0.266988	0.687043	n.s.	none
DDB_G0270058	DDB_G0270058	-1.07566	0.697229	-4.51946	0.0393102	-4.48773	0.0159678	n.i.	none
DDB_G0275023	act22	-0.0471501	0.999718	5.90127	5.23031e-18	6.89047	9.95952e-26	n.i.	has 94% identity with human beta-actin (SwissProt P60709) and 4 amino acid differences compared to the 17 identical actin proteins in the Dictyostelium genome (act1, act2, act4, act5, act6, act7, act8, act9, act11, act12, act13, act14, act15, act16, act19, act20, and act21)
DDB_G0288519	DDB_G0288519	-0.281886	0.999718	1.13765	0.0367988	1.22662	0.00721655	n.s.	none
DDB_G0287229	chdh	-0.332909	0.999718	1.12071	0.0157675	-0.830843	0.0596559	-2.74256	catalyzes the reaction: choline + acceptor = betaine aldehyde + reduced acceptor; ortholog of the mammalian CHDH; contains a putative signal sequence
DDB_G0284931	DDB_G0284931	1.59795	0.249157	2.00271	0.000107437	1.61976	0.00114963	n.i.	this is one of four almost identical genes on C4 (DDB_G0284927), and there is an additional very similar gene (DDB_G0271770) on C2
DDB_G0281071	serA	-0.138112	0.999718	-1.1688	0.0150983	-1.46297	0.000240652	-3.41135	catalyzes the reaction 3-phosphoglycerate + NAD <=> 3-phospho-hydroxypyruvate + NADH
DDB_G0268868	nat10	-0.788378	0.642361	-1.90121	0.010651	-0.906069	0.25566	n.s.	highly conserved protein; ortholog of human NAT10 and yeast KRE33 predicted to localize to the nucleolus
DDB_G0289237	tirA	0.549195	0.999718	2.63115	8.23715e-07	2.35738	4.16157e-06	n.s.	enriched expression in sentinel cells and involved in sustained growth on bacteria and in pathogen response to virulent bacteria
DDB_G0282197	DDB_G0282197	0.871081	0.281421	1.37591	0.0293968	1.48127	0.00546184	n.s.	none
DDB_G0279205	DDB_G0279205	-0.772753	0.597943	-1.53234	0.0475984	-1.83287	0.0033876	n.s.	similar to the conserved CAATT binding factor, which is essential for growth and necessary for 60S ribosomal subunit biogenesis
DDB_G0267458	DDB_G0267458	0.940948	0.194487	1.98173	0.000464307	3.15637	3.57909e-11	n.s.	none
DDB_G0275789	DDB_G0275789	-1.40755	0.976584	2.2206	0.0215557	3.39093	7.35399e-06	n.s.	none
DDB_G0270202	DDB_G0270202	-0.45586	0.999718	-2.06948	0.0167486	-0.947641	0.294313	n.s.	none
DDB_G0275661	DDB_G0275661	-0.236387	0.999718	2.89292	0.00238259	3.30508	6.45829e-05	n.s.	none
DDB_G0282419	cyp508B1	0.765713	0.999718	2.17681	0.000403444	2.56191	1.8483e-06	n.s.	none
DDB_G0273331	DDB_G0273331	0.0255568	0.999718	-2.38731	0.0107473	1.7579	0.0303886	2.60997	there is a second copy of this gene, DDB_G0273859
DDB_G0276869	psvA	-0.313548	0.999718	2.2424	0.00132886	1.96877	0.00282499	n.s.	none
DDB_G0292216	bxdc1	-0.246281	0.999718	-1.88067	0.00161761	-1.10153	0.0714634	1.1738	ortholog of S. cerevisiae RPF2 and H. sapiens BXDC1, a nucleolar protein involved in the assembly of the large ribosomal subunit
DDB_G0287695	DDB_G0287695	0.944186	0.999718	3.62387	0.010937	5.25074	4.23829e-06	1.24896	none
DDB_G0279503	DDB_G0279503	0.415453	0.999718	1.51886	0.00175113	1.1343	0.0170789	n.i.	none
DDB_G0281037	DDB_G0281037	1.06904	0.122115	1.54653	0.00540655	1.01716	0.0679382	n.s.	none
DDB_G0279851	DDB_G0279851	-0.717198	0.720522	-1.50592	0.0363273	-1.57822	0.0093456	1.2097	putative histone acetyltransferase; highly similar to bacterial GCN5-related N-acetyltransferase (GNAT)
DDB_G0270482	gfm1	-0.335637	0.999718	-2.2056	1.80009e-05	-1.9541	6.14844e-05	n.s.	involved in the translocation of the nascent peptide from the ribosomal A-site to the P-site
DDB_G0292898	pgl	0.0421557	0.999718	-1.10549	0.0498215	-1.31409	0.00385431	n.s.	catalyzes the reaction 6-phospho-D-glucono-1,5-lactone + H2O = 6-phospho-D-gluconate
DDB_G0291474	DDB_G0291474	1.17199	0.350688	1.65238	0.00263042	1.92264	5.41021e-05	n.s.	none
DDB_G0291470	DDB_G0291470	0.897826	0.999718	4.39124	0.000104614	5.26247	1.1685e-07	n.s.	none
DDB_G0295761	nle1	-0.435649	0.999718	-1.79538	0.0199176	-1.07239	0.16327	n.i.	none
DDB_G0295765	mdn1	-0.589482	0.943139	-2.77009	2.39497e-05	-2.2881	0.000252102	n.i.	Dictyostelium ortholog of the conserved midasin, a large protein containing an AAA+ ATPase domain and a C-terminal VWFA domain; S. cerevisiae MDN1 is a rRNA processing ATPase.
DDB_G0287081	DDB_G0287081	1.23099	0.120125	1.42973	0.0304982	1.80121	0.000699411	n.s.	none
DDB_G0284497	DDB_G0284497	-0.736638	0.999718	3.21781	0.0466833	4.27455	0.000613223	n.i.	none
DDB_G0278965	DG2033	-0.887706	0.656857	-2.02723	0.0399367	-1.33396	0.136418	n.s.	none
DDB_G0284277	DDB_G0284277	0.198246	0.999718	2.88375	6.16961e-12	4.77467	2.89436e-35	n.s.	similar to bacterial short-chain dehydrogenase/reductase family proteins
DDB_G0282339	rpa5	-0.394	0.999718	-1.16281	0.0359403	-0.982208	0.0473225	1.09439	subunit common to RNA polymerases I and III; ortholog of H. sapiens RPA5 S. cerevisiae RPC40
DDB_G0276531	DDB_G0276531	1.0816	0.0725355	4.0694	3.16074e-26	4.32226	1.08045e-30	n.s.	similar to elaC and TRZ, a zinc phosphodiesterase with tRNA 3'-processing endonuclease activity and probably involved in tRNA maturation by removing a 3'-trailer from precursor tRNA
DDB_G0279245	mpp10	-0.490467	0.999718	-1.38912	0.0177665	-0.870091	0.130617	n.s.	ortholog of H. sapiens MPHOSPH10 and S. cerevisiae MPP10 protein; component of the 60-80S U3 small nucleolar ribonucleoprotein (U3 snoRNP) required for pre-18S rRNA processing; forms a heterotrimeric complex containing IMP3, IMP4
DDB_G0267416	rpmA	-0.561379	0.93637	-1.41116	0.0432062	-1.17909	0.0575545	n.s.	nuclear gene encoding the mitochondrial RNA polymerase
DDB_G0267412	pspA	-0.216091	0.999718	2.69033	0.0130152	1.75515	0.106284	n.s.	expressed in prespore cells; structurally similar to ponticulins
DDB_G0291227	ctrA	0.227938	0.999718	-2.54589	0.00596352	-2.09546	0.0145075	n.s.	similar to mammalian SLC7A1-4 (solute carrier family 7, members 1 to 4); multi-pass membrane protein, contains 15 predicted transmembrane domains
DDB_G0281105	DDB_G0281105	1.1728	0.561575	4.35742	0.0148743	4.00704	0.0129111	n.i.	none
DDB_G0292286	DDB_G0292286	-0.967106	0.449627	-1.67162	0.0106858	-1.74909	0.00220205	n.s.	none
DDB_G0283655	DDB_G0283655	1.51684	0.0623038	2.228	0.000614268	3.08969	2.00305e-08	n.i.	none
DDB_G0291566	grwd1	-0.162134	0.999718	-2.37801	0.000111038	-0.783903	0.299746	n.s.	ortholog of the mammalian GRWD1; contains several WD-40 repeats
DDB_G0290329	DDB_G0290329	0.0588386	0.999718	-1.14004	0.0305755	-1.85745	4.77395e-06	-1.58831	none
DDB_G0292288	DDB_G0292288	0.0342509	0.999718	1.45663	0.0419825	2.11823	0.000132779	n.s.	none
DDB_G0286723	ponC5	0.28885	NA	2.16964	4.45628e-05	-0.173547	0.864185	n.i.	similar to ponticulin (ponA), a protein that anchors the actin cytoskeleton to the plasma membrane; almost identical to the 4 downstream genes
DDB_G0267756	DDB_G0267756	-0.656538	0.999718	1.55425	0.0375181	1.51232	0.0187367	n.i.	none
DDB_G0288443	DDB_G0288443	0.928815	0.313103	-2.74797	0.000416349	-2.62035	0.000244842	n.s.	none
DDB_G0270138	rasU	3.7348	NA	6.09866	0.0189638	5.61615	0.016397	n.i.	none
DDB_G0277831	carD	0.728934	0.999718	2.73277	0.0205459	3.62401	0.000122668	n.s.	low affinity cAMP receptor positively regulating prestalk cell differentiation; belongs to the serpentine/G-protein coupled receptor family
DDB_G0292010	DDB_G0292010	-0.866241	0.501694	-2.00225	0.00407098	-1.28479	0.0622801	n.s.	none
DDB_G0287491	DDB_G0287491	1.13161	0.35777	1.79563	0.000355046	1.06909	0.0409063	n.i.	contains a predicted signal peptide; similar to Polysphondylium pallidum 64 kDa cell surface glycoprotein
DDB_G0278627	DDB_G0278627	0.591255	NA	7.12474	0.000505368	8.78293	7.31248e-07	n.s.	contains 2 coiled-coil domains; similar to D. purpureum protein
DDB_G0269304	DDB_G0269304	-0.859688	0.55981	-2.60009	0.0319371	-1.30992	0.247124	n.s.	similar to S. cerevisiae SHQ1, which is required for box H/ACA small nucleolar ribonucleoprotein particle biogenesis; contains one CS domain
DDB_G0285467	DDB_G0285467	-0.764137	0.345692	-1.30113	0.0432939	-1.25291	0.0236585	n.s.	very similar to bacterial N-ethylammeline chlorohydrolases
DDB_G0285465	nog1	-0.399174	0.999718	-1.63307	0.0137113	-1.00324	0.130243	n.s.	very similar to NOG1/GTPBP4 GTPases, which in S. cerevisiae associates with free 60S ribosomal subunits in the nucleolus and is involved in their biogenesis
DDB_G0269528	fslD	-1.09452	0.800431	3.23786	0.029133	3.95287	0.000991493	n.s.	similar to G-protein-coupled receptors/frizzled proteins; contains 7 putative transmembrane domains and a potential signal sequence
DDB_G0275141	utp5	-0.476157	0.999718	-1.78859	0.0118844	-1.92438	0.00181527	n.s.	putative ortholog of H. sapiens WDR43 and S. cerevisiae UTP4; component of the small subunit (SSU) processome containing the U3 snoRNA involved in processing of pre-18S rRNA
DDB_G0286399	tsfm	-0.0941346	0.999718	-1.24131	0.0319371	-1.44086	0.00271288	n.s.	none
DDB_G0286941	DDB_G0286941	-0.697252	0.71159	-2.50466	0.00116537	-1.57103	0.0445177	n.s.	none
DDB_G0275913	DDB_G0275913	-0.415745	0.999718	1.98576	2.03952e-07	1.98642	4.07299e-08	n.i.	similar to bacterial acetyltransferases; homolog of E. coli maa (maltose O-acetyltransferase); similar to D. purpureum protein
DDB_G0291011	DDB_G0291011	0.974664	0.15979	1.23386	0.0433726	1.01437	0.0639285	1.02064	none
DDB_G0280393	DDB_G0280393	-0.0940962	0.999718	-1.21499	0.0187723	-1.26368	0.00473306	n.i.	none
DDB_G0289415	DDB_G0289415	-0.419638	0.999718	-2.33258	0.00452794	-2.27212	0.00224951	n.s.	none
DDB_G0271272	DDB_G0271272	-0.687745	0.701893	-2.49255	0.000217463	-2.28875	0.000203742	n.i.	similar to the human MybBP1A (Myb-binding protein 1A) that may activate or repress transcription
DDB_G0290623	DDB_G0290623	0.382869	0.999718	1.57813	0.00222643	3.91486	8.78424e-23	n.s.	none
DDB_G0289921	DDB_G0289921	0.598333	0.766211	1.40692	0.00405935	2.57146	4.44716e-11	n.s.	none
DDB_G0285623	DDB_G0285623	na	na	5.92397	0.00768581	8.67986	1.14917e-06	n.i.	none
DDB_G0274981	DDB_G0274981	0.384498	0.999718	1.91067	0.00588797	2.49537	1.46031e-05	n.s.	none
DDB_G0270554	DDB_G0270554	1.69024	0.0594064	1.70352	0.0317727	3.17929	3.72909e-08	n.s.	none
DDB_G0272752	DDB_G0272752	2.70575	NA	2.16996	0.0157675	6.2449	1.5935e-23	n.s.	contains a C2 calcium/lipid-binding region (CaLB)
DDB_G0281399	DDB_G0281399	1.98431	0.967993	2.0056	1.58011e-05	1.72932	9.90218e-05	n.i.	none
DDB_G0287147	gnl3	-0.481131	0.999718	-2.34545	0.0005059	-1.65919	0.0127935	1.13507	similar to the conserved guanine nucleotide-binding protein-like 3; also called nucleostemin in mammals, a protein in the nucleolus of most stem cells and many tumor cells; involved in cell-cycle progression
DDB_G0275339	DDB_G0275339	0.921316	0.463456	1.50014	0.00692602	2.87485	3.95417e-11	n.s.	none
DDB_G0274325	ddx52	-0.51908	0.976707	-1.31564	0.0359403	-1.03711	0.0682577	n.s.	ortholog of H. sapiens DDX52 and S. cerevisiae ROK1 (Rescuer Of Kem1); ROK1 required for 18S rRNA synthesis
DDB_G0287937	bxdc2	-0.330751	0.999718	-1.90993	0.0157675	-1.72011	0.0158575	1.95842	ortholog of the H. sapiens BXDC2 and S. cerevisiae BRX1, a nucleolar protein involved in the assembly of the large ribosomal subunit
DDB_G0284357	dduE	0.76601	0.786864	1.79943	0.000267224	3.12127	3.6588e-14	-1.63147	underexpressed in gskA-and zakA-null mutants; downregulated in the uninfected dupAmutant
DDB_G0267426	cshA	0.580132	0.733127	1.07504	0.0432062	1.78184	8.21334e-06	n.s.	catalyzes the condensation of acetyl-CoA and oxaloacetate to citrate
DDB_G0291826	DDB_G0291826	0.401936	0.999718	2.56451	2.96526e-09	4.52611	1.87961e-31	n.i.	none
DDB_G0291824	DDB_G0291824	-0.0869404	0.999718	2.04338	7.747e-05	2.43486	9.74388e-08	n.s.	none
DDB_G0285983	DDB_G0285983	0.373325	0.999718	5.51596	0.0183715	9.08173	3.32514e-07	n.i.	none
DDB_G0277417	DDB_G0277417	0.521813	0.999718	3.52456	0.00335386	7.08096	3.12583e-14	n.i.	conserved hypothetical 278 aa Dictyostelium protein
DDB_G0287581	DDB_G0287581	0.0205054	0.999718	1.72255	0.0100871	6.40212	1.99924e-42	-2.29635	putative extracellular protein, contains a predicted N-terminal signal sequence
DDB_G0292888	DDB_G0292888	0.880946	0.999718	2.10279	0.0419825	2.0196	0.0234198	n.s.	none
DDB_G0282243	nhp2l1	-0.112156	0.999718	-1.33245	0.0159714	-1.36958	0.00443358	n.s.	ortholog of human NHP2L1, which is believed to play a role in spliceosome assembly; similar to ribosomal protein L7AE but is not likely to be a ribosomal protein
DDB_G0293756	DDB_G0293756	0.147691	0.999718	1.33088	0.0151579	1.35248	0.00460714	n.i.	none
DDB_G0276277	DDB_G0276277	0.17158	0.999718	1.87487	0.00351549	-0.306611	0.758576	-2.4374	none
DDB_G0275123	alyA	-0.120923	0.999718	2.43934	0.00418636	0.289745	0.83551	-1.72	member of a new lysozyme class
DDB_G0293118	DDB_G0293118	-0.517223	0.997538	-1.88582	0.0378648	-1.43795	0.0832749	n.i.	none
DDB_G0282741	ddx18	-0.440711	0.999718	-1.99912	0.0211457	-1.15526	0.18769	1.10627	ortholog of H. sapiens DDX18 and S. cerevisiae HAS1 (Helicase Associated with Set1)
DDB_G0273449	DDB_G0273449	-0.714503	0.75107	-5.35767	1.41572e-08	-4.86278	4.48256e-08	n.s.	part of a small Dictyostelium protein family; enriched in gametes; contains a predicted signal peptide; there is a second copy of this gene, DDB_G0273577
DDB_G0290031	DDB_G0290031	-0.278275	0.999718	-1.48101	0.0130152	-1.11271	0.049652	1.13407	belongs to the ribosomal protein S8e family; ortholog of human TINP1 (TGF-beta-inducible nuclear protein 1) and S. cerevisiae NSA2; NSA2 (NOP seven associated 2) is involved in the biogenesis of the 60S ribosomal subunit
DDB_G0281685	nol1	-0.522215	0.976621	-1.90503	0.0063097	-1.80676	0.00428664	n.s.	possible RNA methyltransferase; ortholog of H. sapiens NOL1 and S. cerevisiae NOP2
DDB_G0284017	ddx10	-0.815437	0.62786	-1.85773	0.0109707	-1.07061	0.145814	n.s.	ortholog of H. sapiens DDX10 and S. cerevisiae HCA4 (Helicase CA)
DDB_G0284817	DDB_G0284817	-0.624247	0.837484	-1.84403	0.00421164	-1.75239	0.00277344	n.s.	none
DDB_G0269920	DDB_G0269920	0.893802	0.999718	3.32819	0.000137703	4.51295	1.7554e-09	n.s.	none
DDB_G0270310	DDB_G0270310	0.542758	0.999718	1.86957	0.0121378	3.61415	2.80202e-10	n.s.	none
DDB_G0276411	mrt4	-0.208701	0.999718	-2.08316	0.00335386	-1.80512	0.00623397	1.96341	involved in mRNA turnover and ribosome assembly
DDB_G0278341	DDB_G0278341	0.127852	0.999718	-1.01417	0.0471754	-1.3897	0.000479314	-4.25	highly similar to ACLY, which catalyzes the reaction ADP + phosphate + acetyl-CoA + oxaloacetate <=> ATP + citrate + CoA
DDB_G0270962	DDB_G0270962	-0.797558	0.731969	-2.84777	0.010651	-2.71698	0.00580067	n.i.	contains a predicted signal peptide
DDB_G0287891	bms1l	-0.824894	0.597954	-2.71336	0.000898154	-2.59749	0.000493011	n.s.	nucleolar protein involved in the biosynthesis of the 40S ribosomal subunit
DDB_G0280171	psiP	0.208267	0.999718	1.1064	0.0241813	1.83037	1.37765e-06	n.s.	contains a signal peptide, a PA14 (anthrax protection antigen) domain, 4 Dictyostelium (CTDC) repeats and a C-terminal transmembrane domain
DDB_G0278751	DDB_G0278751	-0.5073	0.999718	-1.73455	0.0210724	-1.28121	0.0635959	n.s.	similar to S. cerevisiae UPF0399 protein YOR287C, which may be involved in rRNA-processing and ribosome biosynthesis; contains two putative coiled-coil domains
DDB_G0280431	rio1	0.0881083	0.999718	1.6776	0.000999027	2.81888	2.6395e-11	n.s.	atypical, RIO family protein kinase; yeast serine/threonine kinase RIO1 plays a role in cell cycle progression
DDB_G0270100	DDB_G0270100	1.62407	0.0806576	2.17946	0.00157868	3.62306	1.04961e-10	n.s.	none
DDB_G0286015	gmsA	-0.268152	0.999718	3.97446	3.44108e-10	1.60257	0.0397611	n.s.	homologous to the Chlamydomonas reinhardtii a2gene; enriched in gametes
DDB_G0269902	act26	-0.642236	0.999718	2.7725	0.0339298	0.772485	0.662638	-1.57429	has 64% identity with human beta-actin (SwissProt P60709)
DDB_G0281839	DDB_G0281839	-0.499295	0.999718	-2.36942	0.00235812	-1.8665	0.0122307	n.s.	ortholog of H. sapiens BOP1 and S. cerevisiae ERB1 involved in maturation of the 25S and 5.8S rRNAs
DDB_G0281783	DDB_G0281783	0.96812	0.131518	1.09203	0.017836	2.32548	2.3488e-11	n.s.	none
DDB_G0287233	spoT	1.00351	0.118698	1.35597	0.00448344	1.31511	0.00233574	n.s.	none
DDB_G0293562	DDB_G0293562	-0.883446	0.628624	-2.35955	0.010561	-1.79096	0.037912	n.s.	none
DDB_G0276435	DDB_G0276435	1.51063	NA	6.20112	0.0148743	5.27026	0.0258398	n.i.	none
DDB_G0276439	DDB_G0276439	0.017799	0.999718	-1.61069	0.0484439	-1.02783	0.187333	-2.18811	glycoside hydrolase family 25 (GH25) comprises enzymes with lysozyme (EC:3.2.1.17) activity; contains a putative N-terminal signal peptide; has similarity to D. discoideum counting factor components cf50 and cf45-1.
DDB_G0280257	DDB_G0280257	-0.646064	0.867844	-2.14042	0.0222908	-2.14296	0.0085649	n.s.	none
DDB_G0273105	scdB-1	-0.907413	0.126247	-1.24425	0.0169346	-1.26952	0.00516821	-1.93	contains a cytochrome b5 domain; introduces a double bond at the delta position of fatty acids during the biosynthesis of monounsaturated fatty acids; there is a second copy of this gene scdB-2
DDB_G0269966	ddx1	0.339019	0.999718	1.02017	0.0466833	1.63319	2.17657e-05	n.s.	ortholog of ATP-dependent RNA helicase DDX1; contains an SPRY domain, which is of unknown function
DDB_G0292442	DDB_G0292442	0.711637	0.78196	1.45184	0.0325771	2.31603	7.81761e-06	n.s.	phosphorylates NAD+ to NADP+
DDB_G0289283	cupC	-0.878062	0.271129	-1.65317	0.0107082	-2.23949	2.93503e-05	n.i.	highly conserved protein family up-regulated by Ca2+; expressed throughout vegetative cells and in the cortex of aggregating cells
DDB_G0272442	DDB_G0272442	0.0939825	0.999718	1.77403	0.00642145	-1.97241	0.000868429	-1.24	none
DDB_G0276383	DDB_G0276383	0.486122	0.999718	1.49574	0.00351549	2.23383	1.31176e-07	n.s.	contains one von Willebrand factor type A domain
DDB_G0275091	DDB_G0275091	1.05263	0.281421	2.40377	7.07901e-06	2.92192	1.14957e-09	n.s.	contains one predicted coiled-coil domain; similar to D. purpureum protein
DDB_G0281281	DDB_G0281281	0.130554	0.999718	2.0946	0.000678743	2.14798	0.000117952	n.s.	none
DDB_G0277141	cotC	-0.532621	0.999718	2.79846	0.0130108	1.67219	0.146305	n.s.	expressed in prespore cells
DDB_G0276815	DDB_G0276815	-0.625367	0.821346	-1.71505	0.0359403	-1.56528	0.0289704	n.s.	contains 7 WD repeats; belongs to the WD repeat WDSOF1 family; homolog of human WDSOF1, S. cerevisiae SOF1; S. cerevisiae SOF1 is required for ribosomal RNA processing
DDB_G0292458	DDB_G0292458	-0.218905	0.999718	-2.29663	6.26237e-06	-1.71616	0.000499048	n.s.	none
DDB_G0274177	DDB_G0274177	-1.08855	0.44813	1.85487	0.0359403	3.66783	7.15815e-09	n.s.	similar to tenascin X
DDB_G0291167	DDB_G0291167	-0.462996	0.999718	2.22389	0.00523647	3.08536	2.66223e-06	n.s.	none
DDB_G0276159	rtc1	0.529519	0.96256	1.77717	0.000129145	3.08782	3.05592e-15	n.s.	ortholog of RTC1 which catalyzes the conversion of 3'-phosphate to a 2',3'-cyclic phosphodiester at the end of RNA
DDB_G0284729	fslK	-0.962547	0.828711	2.44409	0.0147133	4.35263	8.3079e-09	-1.73554	similar to G-protein-coupled receptors; predicted to have 7 transmembrane domains and a putative signal peptide
DDB_G0288385	DDB_G0288385	0.656758	0.780733	1.18283	0.0170897	2.0515	8.48881e-08	n.s.	none
DDB_G0284549	dduF	-0.434733	0.999718	-2.41562	9.68653e-06	-5.04243	4.99279e-24	n.s.	contains a predicted signal peptide (cleavage site not optimal); downregulated in the uninfected dupAmutant
DDB_G0280407	ddx56	-0.762907	0.656857	-2.16205	0.00116537	-1.57505	0.0145075	n.s.	ortholog of H. sapiens DDX56 and S. cerevisiae DBP9 (Dead Box Protein 9); involved in biogenesis of the 60S ribosomal subunit
DDB_G0293492	DDB_G0293492	-0.363716	0.999718	2.66805	5.69296e-07	0.707221	0.317648	n.i.	glycoside hydrolase family 25 (GH25) comprises enzymes with lysozyme (EC:3.2.1.17) activity; contains a putative N-terminal signal peptide
DDB_G0271074	DDB_G0271074	0.00917297	0.999718	4.89192	0.0164713	3.80208	0.0505578	n.i.	conserved Dictyostelium protein similar to bacterial proteins; contains a predicted signal peptide
DDB_G0270700	DDB_G0270700	1.91848	0.0889679	2.54754	0.00351549	2.3906	0.00286584	n.s.	contains a predicted signal sequence and a putative C-terminal transmembrane domain; contains 7 calcium-binding EGF domains
DDB_G0278401	cprH	2.40735	NA	-5.25593	0.00338609	-6.14613	0.00025431	-1.71847	belongs to the peptidase family C1, sub-family C1A (papain family, clan CA); repressed after Legionella pneumophila infection
DDB_G0272034	DDB_G0272034	1.73472	0.394528	2.07407	0.0466833	2.39207	0.00450951	n.s.	none
DDB_G0272030	DDB_G0272030	0.707659	0.915874	2.25375	0.00254126	0.928025	0.282314	n.s.	none
DDB_G0290999	DDB_G0290999	-0.0534397	0.999718	2.44769	0.00510947	0.97617	0.358023	n.i.	none
DDB_G0277725	thfA	-0.0653987	0.999718	-1.32221	0.0206065	-1.97371	1.32868e-05	-2.34064	catalyzes the reaction 5,10-methylenetetrahydrofolate + NAD+ = 5,10-methenyl-tetrahydrofolate + NADH + H+; enriched in prespore cells
DDB_G0295477	nip7	-0.18659	0.999718	-1.69452	0.0348854	-0.758666	0.371097	n.i.	ortholog of the conserved NIP7 nucleolar protein that is required for 60S ribosome subunit biogenesis; contains a PUA domain
DDB_G0292120	cnrK	0.972658	0.120315	1.9636	4.68275e-06	2.95263	4.86552e-15	n.i.	identified as a suppressor of smlA null mutant cnr11
DDB_G0280463	DDB_G0280463	-0.95175	0.378936	-1.78799	0.0420224	-2.20066	0.00222773	n.s.	none
DDB_G0278263	rpa12	-0.343734	0.999718	-1.58228	0.0241813	-1.36522	0.0304087	n.i.	component of the RNA polymerase I complex; ortholog of S. cerevisiae RPA12
DDB_G0270336	ipo4	-0.562223	0.9119	-1.52296	0.0187723	-1.05087	0.0918004	n.s.	ortholog of importin 4, a nuclear transport receptor that is thought to mediate docking of the importin/substrate complex to the nuclear pore complex
DDB_G0287399	DDB_G0287399	-0.6164	0.645955	1.52643	0.000957624	2.47543	1.49175e-10	n.s.	none
DDB_G0275631	DDB_G0275631	0.813886	0.565632	1.42362	0.00768524	2.3734	2.34297e-08	n.s.	the protein phosphatase 2C-related domain occurs in protein phosphatase 2C (PPC2) as well as in other proteins, such as pyruvate dehydrogenase (lipoamide)]-phosphatase and adenylate cyclase
DDB_G0277097	uduF	-1.09452	0.388864	-1.48257	0.0311097	1.31333	0.0237178	n.s.	upregulated in the uninfected dupAmutant
DDB_G0277899	DDB_G0277899	1.17757	0.611583	3.43021	0.00407098	4.80575	1.00824e-06	n.s.	none
DDB_G0267724	DDB_G0267724	0.0678273	0.999718	4.35746	0.0346899	4.02714	0.0265168	n.s.	none
DDB_G0267720	DDB_G0267720	0.702376	0.999718	1.95709	0.00534873	3.25594	8.14394e-09	n.s.	none
DDB_G0281951	cyrA	-0.117942	0.999718	4.771	0.0318544	8.43056	3.02988e-07	n.s.	contains three slime mold repeats, and 4 EGF-like domains; extracellular similar to prestalk protein precursor; protein cleaved into a 45 and 40 kDa fragments found in the slime sheath; interacts extracellularly with calmodulin; the cyrA EGFL1 peptide regulates chemotactic cell motility; TalB and PaxB are required for DdEGFL1 to enhance cell motility
DDB_G0276115	dph5	-0.345412	0.999718	-1.76902	9.46873e-05	-1.6066	0.000137872	1.72	ortholog to the conserved DPH5, a methyltransferase which in S. cerevisiae is required for synthesis of diphthamide, a modified histidine residue of translation elongation factor 2
DDB_G0285345	DDB_G0285345	1.64601	0.0566821	1.56839	0.0241813	2.65971	6.9929e-07	n.s.	contains a predicted signal peptide
DDB_G0290121	purD	-0.371048	0.999718	-1.32268	0.0319371	-2.17153	4.31617e-06	-2.05444	bifunctional enzyme of the de novo DNA synthesis pathway, contains aminoimidazole ribotide synthetase and glycinamide ribotide synthetase activities
DDB_G0289699	nola2	0.150618	0.999718	-1.05363	0.0470772	-1.21485	0.00494583	n.i.	component of the H/ACA small nucleolar ribonucleoprotein (H/ACA snoRNP) complex required for pre-mRNA processing and pseudouridylation
DDB_G0291998	naglu	-0.226616	0.999718	1.29609	0.0319151	3.04994	1.74792e-12	n.s.	catalyzes the hydrolysis of terminal non-reducing N-acetyl-D-glucosamine residues in N-acetyl-alpha-D-glucosaminides; mutated in patients with mucopolysaccharidosis type IIIB (Sanfilippo syndrome type B), a lysosomal storage disorder
DDB_G0280979	pcmA	0.377263	0.999718	1.76186	0.00665395	3.40764	2.13597e-11	n.s.	similar to PIMT or PCMT (L-isoaspartyl/D-aspartyl protein carboxyl methyltransferase or protein-L-isoaspartate (D-aspartate) O-methyltransferase)
DDB_G0276681	DDB_G0276681	0.815018	0.280174	1.23727	0.0084519	0.996411	0.0243007	n.s.	none
DDB_G0291444	DDB_G0291444	-0.742658	0.687156	-1.92554	0.0177665	-1.02334	0.220431	n.i.	none
DDB_G0292626	DDB_G0292626	-0.542195	0.971037	-2.01163	0.00407098	-1.94938	0.00204319	n.s.	belongs to the RAS-like GTPase superfamily; similar to bacterial GTP-binding protein YchF; similar to D. purpureum protein
DDB_G0293622	DDB_G0293622	-0.858479	0.472081	-2.01147	0.00824531	-1.77118	0.0105963	n.s.	none
DDB_G0281181	DDB_G0281181	1.53845	NA	5.16196	0.0157675	7.72068	4.51338e-06	n.i.	none
DDB_G0280059	rhgB	-0.578795	0.737188	-3.08332	5.23031e-18	-2.56895	3.58334e-13	n.s.	contains 10 transmembrane domains
DDB_G0288003	DDB_G0288003	-0.155093	NA	2.20342	0.0173972	0.874994	0.428143	n.s.	conserved Dictyostelium protein; contains a putative N-terminal signal sequence, a C-terminal anchoring transmembrane domain and one EGF-like domain
DDB_G0269860	DDB_G0269860	-0.646605	0.780733	-2.09496	0.000319337	-1.62366	0.00368999	n.s.	similar to importin-7 and importin-8 from numerous eukaryotes; involved in nuclear protein import
DDB_G0291520	iliO	0.758152	0.425198	2.03232	7.77076e-07	3.23492	9.28501e-19	n.s.	contains a DRB0094-related RNA ligase domain, conserved in bacteria, phages, and fungi; similar to D. purpureum protein; induced by Legionella pneumophila infection
DDB_G0279211	DDB_G0279211	-0.971512	0.791807	-4.069	8.22733e-18	-6.58187	9.74833e-45	n.s.	catalyzes the reaction homocysteine + 5-methyltetrahydropteroyltri-L-glutamate <=> L-methionine + tetrahydropteroyltri-L-glutamate
DDB_G0293560	rpa2	-0.637705	0.794284	-2.63917	0.000671226	-1.76643	0.0236585	1.03647	component of the RNA polymerase I complex; ortholog of S. cerevisiae RPA135
DDB_G0291277	DDB_G0291277	0.674595	0.967369	1.38159	0.00313822	2.08269	6.48769e-08	n.s.	none
DDB_G0279083	utp20	-0.708084	0.798804	-1.94237	0.00116696	-1.53748	0.00705873	n.s.	component of the small subunit (SSU) processome containing the U3 snoRNA involved in processing of pre-18S rRNA; contains a DRIM domain (Down-Regulated In Metastasis)
DDB_G0288551	DDB_G0288551	-0.660409	0.812473	-2.10621	0.00533416	-1.54546	0.0336989	n.s.	conserved protein, contains 5 PUF domains; D. melanogaster pumilio binds through a PUF domain to the 3' UTR of target mRNAs
DDB_G0269344	DDB_G0269344	-0.52497	0.867844	-1.74993	0.00579292	-1.38408	0.021032	n.s.	ortholog of the H. sapiens angio-associated migratory cell protein AAMP
DDB_G0269802	DDB_G0269802	0.56764	0.976707	1.9084	0.0129901	2.67391	1.27247e-05	n.s.	none
DDB_G0267892	DDB_G0267892	0.893223	0.55981	1.70796	0.0494677	2.38992	0.000325121	n.s.	none
DDB_G0272955	DDB_G0272955	1.13519	0.0627258	1.59034	0.000632282	2.47098	2.22369e-10	n.s.	eukaryotic phytanoyl-CoA dioxygenase is a peroxisomal enzyme catalysing the first step of phytanic acid alpha-oxidation
DDB_G0286021	DDB_G0286021	-0.681952	0.999718	2.20947	0.000105043	1.31775	0.0277895	n.s.	none
DDB_G0280489	wdr46	-0.651193	0.853712	-1.76273	0.0184772	-1.73593	0.0081552	1.30703	component of the small subunit (SSU) processome containing the U3 snoRNA involved in processing of pre-18S rRNA
DDB_G0284637	DDB_G0284637	1.64725	0.310467	3.4502	0.000440499	3.92564	5.36723e-06	n.i.	none
DDB_G0285829	bxdc5	-0.418809	0.999718	-1.46121	0.0413725	-0.797357	0.266493	1.38128	ortholog of S. cerevisiae RPF1 and H. sapiens BXDC5, a nucleolar protein involved in the assembly of the large ribosomal subunit
DDB_G0295799	DDB_G0295799	-0.762972	0.999718	-3.41244	0.00943584	-1.50253	0.210541	n.i.	weakly similar to smlA
DDB_G0287537	nop14	-0.68257	0.765614	-2.27666	0.00603057	-1.66814	0.0331695	n.s.	ortholog of S. cerevisiae NOP14 involved in rRNA processing
DDB_G0274265	DDB_G0274265	-0.288455	0.999718	3.3137	0.00153623	2.94201	0.0027729	n.s.	none
DDB_G0293064	DDB_G0293064	-0.411799	0.999718	-2.56246	0.00229684	-2.26359	0.00374598	n.s.	none
DDB_G0268198	rpa43	-0.532793	0.981304	-1.97491	0.0107082	-1.13531	0.134029	1.11869	component of the RNA polymerase I complex; ortholog of S. cerevisiae RPA43
DDB_G0282329	DDB_G0282329	2.73176	NA	6.43515	0.00594542	7.3443	0.000247014	n.s.	none
DDB_G0269722	DDB_G0269722	-0.38178	0.999718	-1.45888	0.0187723	-0.756675	0.241333	n.s.	belongs to the methyltransferase superfamily; ortholog of human WBSCR22, an uncharacterized methyltransferase associated with Williams-Beuren syndrome
DDB_G0285679	nol5a	-0.100169	0.999718	-1.85242	0.00616213	-1.2348	0.0669283	n.s.	ortholog of H. sapiens NOL5A and S. cerevisiae SIK1; SIK1 is a component of the box C/D snoRNP complex involved in rRNA processing
DDB_G0285763	DDB_G0285763	0.70793	0.771199	1.4089	0.00326542	2.7302	8.4495e-13	n.s.	none
DDB_G0275885	DDB_G0275885	-0.595621	0.79192	-1.79237	0.0029527	-1.27652	0.0268631	1.42574	none
DDB_G0276283	utp13	-0.694768	0.729545	-1.74886	0.0214649	-1.31304	0.0631801	n.s.	component of the small subunit (SSU) processome containing the U3 snoRNA involved in processing of pre-18S rRNA; highly similar to H. sapiens transducin beta-like 3 (TBL3)
DDB_G0288233	DDB_G0288233	2.05009	NA	2.3405	0.0218149	2.75	0.00124025	n.i.	none
DDB_G0284111	DDB_G0284111	-0.00155039	NA	3.63203	0.00269832	5.57673	1.51579e-08	n.i.	none
DDB_G0268762	DDB_G0268762	-0.131666	0.999718	-1.71455	0.0333465	-0.140279	0.913191	n.s.	none
DDB_G0291420	DDB_G0291420	0.784774	NA	3.9665	0.0214648	7.03523	5.81431e-08	n.s.	none
DDB_G0281961	DDB_G0281961	0.0480538	0.999718	1.99786	0.000105198	0.601482	0.361586	n.s.	contains a putative penicillin binding domain used in bacterial resistance mechanisms
DDB_G0276941	cotA	-0.419462	0.999718	2.43838	0.0058319	1.29071	0.187676	n.s.	expressed in prespore cells
DDB_G0276947	trap1	0.139469	0.999718	-2.03853	0.00332047	0.664487	0.4384	n.s.	similar to metazoan TRAP1; member of the HSP90 family; translocates to mitochondria during the prestarvation response
DDB_G0277019	wdr36	-0.634422	0.860222	-1.70787	0.0218249	-1.64034	0.0124282	n.s.	putative U3 snoRNP protein; ortholog of H. sapiens WDR36 and S. cerevisiae UTP21; WDR36 has been implicated in open angle glaucoma 1 type G (GLC1G)
DDB_G0289949	DDB_G0289949	0.779243	0.479002	1.84098	6.98901e-05	1.67339	0.000112554	n.i.	conserved Dictyostelium protein; contains a putative N-terminal signal sequence, a C-terminal anchoring transmembrane domain and one EGF-like domain
DDB_G0290387	DDB_G0290387	-0.320929	0.999718	-0.353055	0.960253	-1.20182	0.0136157	n.s.	similar to D. purpureum proteins; small gene family in both species
DDB_G0269594	DDB_G0269594	0.302333	0.999718	0.478684	0.80773	1.08205	0.023272	n.s.	none
DDB_G0290535	DDB_G0290535	-0.365511	0.999718	0.616995	0.525326	1.20949	0.00615698	-1.85068	catalyzes the reaction aldehyde + NAD+ + H2O = an acid + NADH + H+
DDB_G0290531	DDB_G0290531	-1.48407	0.0994695	0.557628	0.950517	2.73238	1.21414e-05	n.s.	none
DDB_G0269378	rad1	-0.418459	0.999718	0.719681	0.65616	1.30396	0.0299326	n.s.	similar to Rad1, a component of a heterotrimeric clamp (the 9-1-1 complex) that recognizes damaged DNA and initiates signal transduction for repair
DDB_G0294094	lrrA	-0.176987	0.999718	-0.518218	0.74727	-1.17222	0.0117201	n.s.	putative ortholog of H. sapiens SHOC2, also known as Ras-binding protein Sur-8
DDB_G0285619	DDB_G0285619	1.29831	0.0505109	0.828997	0.161856	0.890086	0.0469834	n.s.	none
DDB_G0279275	DDB_G0279275	-0.763339	0.824443	-0.396517	0.960253	-1.67863	0.00117523	n.s.	none
DDB_G0275713	DDB_G0275713	-0.81564	0.80807	-1.29518	0.0668077	-3.23543	2.07839e-10	n.s.	conserved hypothetical protein; contains a putative N-terminal signal sequence
DDB_G0288943	DDB_G0288943	-0.0830605	0.999718	1.07141	0.161856	2.5094	1.43184e-07	n.s.	none
DDB_G0277947	shmt1	-0.248855	0.999718	-0.95461	0.093527	-1.82988	3.85158e-06	n.s.	cytoplasmic serine hydroxymethyltransferase; catalyzes the reaction L-serine + tetrahydrofolate <=> L-glycine + 5,10-methylene-tetrahydrofolate + H2O
DDB_G0287965	nae1	0.34321	0.999718	0.031338	0.999641	0.984852	0.0331599	n.s.	conserved regulatory subunit of the dimeric UBA3-NEA1 E1 enzyme, which activates NEDD8; necessary for cell cycle progression through the S-M checkpoint
DDB_G0268646	DDB_G0268646	0.225653	0.999718	-0.454879	0.785122	-0.89534	0.0467619	n.i.	none
DDB_G0269162	DDB_G0269162	0.697049	0.58528	0.432446	0.862828	1.58171	0.000200839	n.s.	shares a short region of similarity with autophagy related protein Atg13
DDB_G0272492	DDB_G0272492	0.965159	0.280174	-0.73801	0.640599	-2.11163	0.000239896	-1.08636	none
DDB_G0283427	DDB_G0283427	0.228259	0.999718	2.45643	NA	6.1593	0.0157382	n.i.	none
DDB_G0270430	wipA	0.141363	0.999718	0.0856807	0.999641	1.1015	0.0253706	n.s.	interacts with WASP (wasA) and plays a role in F-actin elongation and pseudopod formation in response to chemoattractant; contains an actin-binding WH2 (Wiskott Aldrich syndrome homology region 2) domain and a WH1-like central region; predicted to have an N-terminal signal peptide
DDB_G0270432	DDB_G0270432	0.0928251	0.999718	0.66858	0.608712	1.11648	0.0374736	n.s.	none
DDB_G0270380	rpl30	0.153407	0.999718	-0.427242	0.858557	-1.07716	0.0203999	n.s.	protein component of the large (60S) ribosomal subunit
DDB_G0282485	cepB	-0.155318	0.999718	-0.686782	0.366305	-0.97833	0.0283147	n.s.	localizes to the centrosome
DDB_G0285103	DDB_G0285103	1.60559	0.314561	1.34552	0.335695	3.69978	8.22385e-08	n.s.	none
DDB_G0286505	DDB_G0286505	-0.612928	0.883964	-1.49971	0.0670508	-1.82375	0.00525751	n.s.	conserved protein
DDB_G0272260	sppA	-0.138502	0.999718	0.14782	0.999641	1.03112	0.024822	n.s.	similar to mammalian sphingosine-1-phosphate phosphatase
DDB_G0286957	DDB_G0286957	0.0665659	0.999718	1.63602	0.0994774	5.58388	1.95845e-20	n.i.	none
DDB_G0286955	DDB_G0286955	0.337087	0.999718	1.09797	0.193558	1.77876	0.00113384	n.s.	none
DDB_G0277035	DDB_G0277035	0.69459	0.999718	3.59992	0.0716643	6.79588	8.22241e-07	n.s.	none
DDB_G0277031	DDB_G0277031	-0.38687	0.999718	0.211275	0.999641	-1.30745	0.00454492	n.s.	conserved hyphothetical protein; similar to AprA, an autocrine repressor of proliferation
DDB_G0287515	tat	-0.657769	0.635945	0.803268	0.345254	1.89752	1.80867e-05	n.s.	catalyzes the reaction L-tyrosine + 2-oxoglutarate <=> 4-hydroxyphenylpyruvate + L-glutamate
DDB_G0283851	DDB_G0283851	-0.476718	0.999718	0.762107	0.210065	1.36174	0.000394061	n.s.	none
DDB_G0267834	DDB_G0267834	0.661696	0.999718	1.21529	0.362668	2.46029	0.000429074	n.s.	none
DDB_G0292270	comG	0.0303452	0.999718	0.445789	0.79867	0.936489	0.0356854	n.s.	catalyzes the reaction aldehyde + NAD+ + H2O = an acid + NADH + H+
DDB_G0267786	DDB_G0267786	-0.29214	0.999718	0.919168	0.165273	1.7595	4.27232e-05	-1.13177	weakly similar to niban protein, a marker for renal carcinogenesis
DDB_G0284331	regA	-0.402702	0.999718	-0.0706048	0.999641	1.41352	0.00440775	-1.23729	contains a 3'5'-cyclic nucleotide phosphodiesterase and a response regulator receiver domain found in two-component signal transduction systems
DDB_G0285451	leuS	0.24591	0.999718	0.273964	0.999641	1.74636	0.00582201	n.s.	catalyzes the reaction ATP + L-leucine + tRNALeu = AMP + diphosphate + L-leucyl-tRNALeu
DDB_G0285455	impA	-0.0972752	0.999718	-0.372423	0.886325	-0.921435	0.0339099	n.s.	highly similar to FKBP-type peptidyl-prolyl isomerase, which functions as a receptor for immunosuppressants in vertebrates; the impA promoter is shared with and inversely regulated with dia1 during the growth-development transition
DDB_G0282021	DDB_G0282021	-0.40774	0.999718	0.751245	0.496772	1.60975	0.00156234	n.s.	conserved in Polysphondylium pallidum
DDB_G0277635	rps27	0.157347	0.999718	-0.365594	0.894671	-1.01757	0.0158653	n.s.	protein component of the small (40S) ribosomal subunit; ribosomal protein S27 homolog
DDB_G0268042	DDB_G0268042	-0.000861233	0.999825	-0.708174	0.280958	-1.11184	0.00589708	n.s.	The CS domain may be involved in protein-protein interactions
DDB_G0275777	DDB_G0275777	0.694222	0.749911	-0.131626	0.999641	1.9725	0.00351764	n.s.	similar to D. purpureum protein
DDB_G0286511	DDB_G0286511	0.420122	0.999718	0.386589	0.942595	1.11332	0.0264454	n.s.	similar to human ubiquitin-conjugating enzyme E2, J2 (UBE2J2) and yeast ubiquitin-conjugating 6 (UBC6)
DDB_G0287035	lmpB	0.224629	0.999718	0.123711	0.999641	1.34158	0.0380759	-3.15236	none
DDB_G0279623	DDB_G0279623	0.925351	0.999718	1.32883	0.760831	2.97324	0.0117999	n.i.	none
DDB_G0290389	ascc3	0.380051	0.999718	0.88948	0.12927	1.65378	2.63201e-05	n.s.	ortholog of human ASCC3, part of the TRIP4 complex that enhances activation of NF-kappa-B, SRF, and AP1
DDB_G0293938	DDB_G0293938	0.017747	0.999718	-0.584709	0.636035	-1.36147	0.0027729	n.s.	none
DDB_G0288155	DDB_G0288155	0.0949617	0.999718	-0.329398	0.925964	-0.833136	0.0496225	n.s.	none
DDB_G0273033	DDB_G0273033	-0.612602	0.999718	0.827936	0.999641	3.3262	0.00677162	-1.68847	there is a second copy of this gene, DDB_G0274041
DDB_G0273039	iptC-1	0.2146	0.999718	1.67762	0.0667832	1.88654	0.00965158	n.s.	IPP transferases modify both cytoplasmic and mitochondrial tRNAs at A(37) to give isopentenyl A(37); there is a second copy of this gene, <a href=%22/db/cgi-bin/gene_page.pl?primary_id=DDB_G0274017%22>iptC-2
DDB_G0273397	carA-1	0.0488352	0.999718	0.424495	0.980635	1.95938	0.000844948	n.s.	high affinity cAMP receptor; belongs to the serpentine/G-protein coupled receptor family; there is a second copy of this gene, carA-2
DDB_G0277195	mrps17	0.139461	0.999718	-0.66144	0.442126	-0.947879	0.0432001	1.01051	protein component of the mitochondrial small ribosomal subunit
DDB_G0283449	DDB_G0283449	0.045416	0.999718	0.208806	0.999641	1.17491	0.00514968	n.i.	none
DDB_G0269850	DDB_G0269850	-0.244523	0.999718	0.547099	0.781646	-2.9726	2.83431e-11	n.s.	contains a signal peptide and a single predicted transmembrane domain at the C-terminus; small gene family in D. discoideum; D. purpureum has a single gene
DDB_G0279843	DDB_G0279843	-0.162194	0.999718	-0.041892	0.999641	1.74563	0.000565631	n.s.	none
DDB_G0274561	act21	-0.158411	0.999718	-0.128504	0.999641	1.52835	0.00774834	n.i.	has 94% identity with human beta-actin (SwissProt P60709); encodes one of the 17 identical actin proteins in the Dictyostelium genome (act1, act2, act4, act5, act6, act7, act8, act9, act11, act12, act13, act14, act15, act16, act19, act20, and act21)
DDB_G0274569	acgA	-0.719456	0.999718	-0.447542	0.999641	1.94859	0.00652307	n.s.	single transmembrane adenylyl cyclase expressed during and regulating spore germination
DDB_G0277993	DDB_G0277993	0.478939	0.999718	0.382622	0.904924	1.06492	0.0183027	n.i.	importins function in nuclear protein import, however, this protein does not contain the N-terminal importin beta binding domain (IBB domain)
DDB_G0277999	DDB_G0277999	-0.34165	0.999718	-0.355393	0.999641	-1.5353	0.0191004	n.s.	sulfurates the molybdenum cofactor, which is essential for xanthine dehydrogenase and aldehyde oxidase
DDB_G0278463	DDB_G0278463	0.105799	0.999718	1.25995	0.448821	2.70151	0.000515218	n.s.	none
DDB_G0279591	glnA3	0.00834459	0.999718	-0.898828	0.25458	-1.8523	6.98285e-05	-2.40289	catalyzes the reaction ATP + L-glutamate + ammonia = ADP + phosphate + L-glutamine
DDB_G0284669	prsA	-0.329008	0.999718	-0.784008	0.388436	-1.10785	0.034459	-1.36673	ortholog of PRS, involved in nucleotide, histidine, and tryptophan biosynthesis
DDB_G0282715	DDB_G0282715	-0.023216	0.999718	0.732062	0.915715	3.79292	1.05139e-07	n.s.	none
DDB_G0289351	DDB_G0289351	1.43548	0.580448	0.444569	0.999641	4.33567	0.000260447	n.i.	conserved Dictyostelium protein; contains a putative N-terminal signal sequence, a C-terminal anchoring transmembrane domain and 4 extracellular EGF domains
DDB_G0267640	gtaE	0.393352	0.999718	0.833314	0.49568	1.5511	0.00706336	n.s.	has 18 amino acids between the two CX2C motifs
DDB_G0269450	DDB_G0269450	1.00838	0.561258	1.56716	0.203968	3.24975	9.98921e-06	n.s.	none
DDB_G0269454	trpS	0.72227	0.53077	0.572802	0.693642	1.76615	6.5422e-05	1.39005	catalyzes the reaction ATP + L-tryptophan + tRNATrp <=> AMP + diphosphate + L-tryptophan-tRNAThr
DDB_G0267252	DDB_G0267252	-1.31079	NA	-1.47831	0.0856972	-3.17249	6.93174e-07	n.i.	none
DDB_G0289815	cupB	-1.02401	0.0766677	-1.29201	0.0942353	-1.40151	0.0230008	n.i.	highly conserved protein family up-regulated by Ca2+; expressed throughout vegetative cells and in the cortex of aggregating cells; cells overexpressing antisense mRNA fail to aggregate
DDB_G0288711	tgrM1	-0.36528	0.999718	1.70825	0.0518794	3.55455	6.39285e-09	n.s.	contains a predicted signal peptide
DDB_G0289813	cupF	-0.691826	0.634996	-0.986861	0.349403	-1.29602	0.0431222	n.i.	highly conserved protein family up-regulated by Ca2+; expressed throughout vegetative cells and in the cortex of aggregating cells
DDB_G0348374	DDB_G0348374	0.171998	0.999718	-0.322515	0.957322	-0.911634	0.0439937	n.i.	none
DDB_G0280385	DDB_G0280385	0.915205	0.196755	0.451335	0.8169	1.52967	0.000192864	n.s.	none
DDB_G0273197	alyD-1	0.0301121	0.999718	-0.51	0.913656	1.59316	0.00777854	-1.83362	member of a new lysozyme class
DDB_G0273191	rps30-1	0.22182	0.999718	-0.425078	0.838127	-1.26563	0.00297291	n.i.	protein component of the small (40S) ribosomal subunit; there is a second copy of this gene, rps30-2
DDB_G0289405	DDB_G0289405_ps	-0.0567593	0.999718	0.832479	0.999641	2.94095	0.0240592	n.i.	putative pseudogene; very similar to parts of DDB_G0289409
DDB_G0270088	DDB_G0270088	-1.17226	0.865998	-0.52844	0.942595	2.55941	5.25509e-06	n.i.	none
DDB_G0274357	DDB_G0274357	3.09179	NA	-1.1735	0.991938	5.4374	1.00164e-06	n.s.	contains two EF hands; very similar to Dictyostelium cbpK and cbpJ; belongs to the frequenins, a family of myristoyl-switch calcium-binding proteins
DDB_G0268680	DDB_G0268680	0.443569	0.999718	0.687217	0.472202	1.13724	0.0182496	n.s.	contains a predicted signal anchor and 3 putative transmembrane domains
DDB_G0275753	psmD9	-0.183719	0.999718	-0.287738	0.999641	-1.6649	0.00362746	n.s.	none
DDB_G0282525	DDB_G0282525	0.376267	0.999718	0.774164	0.638281	1.49838	0.0149612	n.s.	none
DDB_G0287929	DDB_G0287929	0.194562	0.999718	0.0777758	0.999641	1.20802	0.0038975	n.i.	none
DDB_G0271902	pscA	-0.365449	0.999718	-0.607447	0.671321	-1.19438	0.020689	n.s.	ortholog of prokaryotic penicillin-binding protein 4 (PBP4); inhibited by penicillin G
DDB_G0276221	fam21	-0.0235409	0.999718	-0.808241	0.513316	-1.27043	0.0366032	n.s.	none
DDB_G0292696	colA	-0.365367	0.999718	1.01435	0.811059	4.1129	1.26697e-06	n.s.	collagen-binding surface protein Cna-like, B-type domain-containing, large protein
DDB_G0284365	DDB_G0284365	-0.767585	0.873002	0.598693	0.904924	2.84569	1.67964e-06	n.s.	none
DDB_G0269716	DDB_G0269716	-0.296169	0.999718	0.302805	0.958809	0.968164	0.0192886	n.s.	none
DDB_G0278195	DDB_G0278195	0.0537302	0.999718	-0.699483	0.559531	-1.33005	0.012158	n.s.	none
DDB_G0288297	DDB_G0288297	-0.0970621	0.999718	2.61612	0.302609	3.91329	0.00970746	n.i.	none
DDB_G0288295	rpl12	0.498865	0.999718	-0.287929	0.999641	-1.20224	0.0313802	n.s.	protein component of the large (60S) ribosomal subunit
DDB_G0291816	DDB_G0291816	0.0632962	0.999718	-0.157413	0.999641	-0.94029	0.0288109	n.s.	none
DDB_G0291810	DDB_G0291810	0.116048	0.999718	0.326697	0.960253	0.915457	0.0495921	n.s.	none
DDB_G0288299	pdx1	-0.017199	0.999718	-0.521253	0.737181	-1.02263	0.0316653	n.s.	ortholog of S. cerevisiae SNZ1 involved in the pyridoxine (vitamin B6) biosynthetic pathway
DDB_G0284645	DDB_G0284645	0.821366	0.674583	0.209647	0.999641	1.52394	0.0123321	n.s.	none
DDB_G0293556	mcfG	0.0386225	0.999718	-0.363979	0.889717	-1.05841	0.00971745	n.s.	ortholog of slc25a20, involved in transport of carnitine/acylcarnitine across the mitochondrial membrane
DDB_G0295669	DDB_G0295669	-0.117428	0.999718	0.253211	0.999641	1.33023	0.0216028	n.i.	isochorismatase (also: 2,3 dihydro-2,3 dihydroxybenzoate synthase) catalyses the conversion of isochorismate + H2O to 2,3-dihydroxybenzoate and pyruvate; conserved in bacteria, fungi, amoeba, and plants
DDB_G0285179	DDB_G0285179	-0.67919	0.999718	0.648211	0.809434	2.79044	1.43184e-07	n.s.	none
DDB_G0284171	chdA	-0.38586	0.999718	0.00876093	0.999641	-1.12373	0.019203	n.s.	CHD gene family protein containing a chromodomain, a helicase domain, and a DNA-binding domain; similar to H. sapiens chromodomain-helicase-DNA-binding protein 2 (CHD-2) (SwissProt: O14647); chromatin remodeling complex subunit R (CHR) protein; SWI2/SNF2 homolog
DDB_G0286991	DDB_G0286991	0.965346	0.2225	0.697054	0.440575	1.46786	0.000893922	n.s.	none
DDB_G0295739	DDB_G0295739	-0.306168	0.999718	0.243812	0.999641	1.76727	1.55032e-05	n.i.	has similarity to bacterial homoserine kinases or serine proteases
DDB_G0289267	DDB_G0289267	-2.37403	NA	3.5994	0.335695	5.1177	0.0197696	n.s.	none
DDB_G0289439	DDB_G0289439	-0.0211683	0.999718	-0.230257	0.999641	-1.23715	0.00175017	n.i.	member of the HIT superfamily involved in nucleotide binding
DDB_G0287159	cysS	-0.0194035	0.999718	0.25591	0.999641	1.64562	0.000154332	n.s.	catalyzes the reaction ATP + L-cysteine + tRNACys = AMP + diphosphate + L-cysteinyl-tRNACys
DDB_G0273179	DDB_G0273179	2.77985	NA	2.39553	0.731376	6.09898	0.000932375	n.s.	there is a second copy of this gene, DDB_G0273819
DDB_G0286109	DDB_G0286109	0.274254	0.999718	0.611436	0.929755	1.57621	0.0402462	n.s.	similar to latrophilin-like receptor lrlA, a G-protein-coupled receptor (GPCR) family protein; contains four predicted transmembrane domains and is significantly shorter than lrlA
DDB_G0286289	DDB_G0286289	0.380817	0.999718	0.667881	0.397612	1.50511	0.000145295	n.s.	none
DDB_G0270436	DDB_G0270436	-0.4024	0.999718	1.22141	0.351984	-2.28193	0.00186605	n.s.	none
DDB_G0288331	expl7	-0.149379	0.999718	0.870523	0.861989	3.3301	3.29139e-05	n.s.	expressed in pstAB cells and in pstAB and stalk cells during the Mexican hat stage and culmination; similar to plant expansins, which modify the cell wall to allow expansion during cell growth; but with a divergent carboxyl terminus; contains a predicted signal peptide
DDB_G0288333	purB	-0.249077	0.999718	-0.871857	0.382005	-1.15831	0.0492565	-1.11449	catalyzes two reactions in de novo DNA synthesis: 5'-phosphoribosyl-4-(N-succinocarboxamide)-5-aminoimidazole <=> fumarate + AICAR and adenylo-succinate <=> fumarate + AMP
DDB_G0285413	DDB_G0285413	0.780163	0.971037	0.898318	0.89932	2.29978	0.0251733	n.s.	none
DDB_G0268666	DDB_G0268666	0.615408	0.999718	0.211547	0.999641	1.43832	0.0221518	n.i.	none
DDB_G0286695	DDB_G0286695	-0.442535	0.999718	0.300714	0.989741	1.84665	5.47154e-06	n.s.	none
DDB_G0283995	DDB_G0283995	0.0772951	0.999718	1.01343	0.739169	1.94185	0.0318314	n.s.	none
DDB_G0284345	cyp556A1	-1.13391	NA	1.22787	0.999641	5.53864	0.0122184	n.s.	none
DDB_G0284619	DDB_G0284619	0.0720604	NA	-0.196387	0.999641	2.66364	0.0127204	n.s.	none
DDB_G0291830	thg1	0.678453	0.976119	1.64043	0.0847676	3.11782	1.30801e-06	n.s.	conserved eukaryotic protein that has been shown in S. cerevisiae to be an essential tRNAHis guanylyltransferase that adds a guanosine residue to the 5' end of tRNAHis after transcription and RNase P cleavage; conserved domain also known as DUF549 domain
DDB_G0282757	DDB_G0282757	0.950702	0.183874	-0.459726	0.825274	-1.13228	0.0168093	n.i.	none
DDB_G0267602	DDB_G0267602	0.0717072	0.999718	0.999389	0.406582	1.61611	0.011952	n.s.	none
DDB_G0278313	DDB_G0278313	-0.0684822	0.999718	1.37741	0.0183715	1.71961	0.000348267	n.s.	underexpressed in gskA-and zakA-null mutants
DDB_G0285193	hprT	0.0347966	0.999718	-0.764113	0.311255	-1.60144	0.000147833	n.i.	catalyzes the reaction PRPP + hypoxanthine = pyrophosphate + IMP in the salvage pathways of purine nucleosides; overexpressed in dstB (STATb) null mutants
DDB_G0272140	DDB_G0272140	0.140864	0.999718	-0.509577	0.744884	-0.945623	0.0493756	n.s.	similar to mitochondrial ribosomal protein L54
DDB_G0272200	DDB_G0272200	0.545474	0.879079	0.851906	0.133038	1.11465	0.00735437	n.s.	none
DDB_G0272202	DDB_G0272202	0.19104	0.999718	0.572287	0.820215	1.44838	0.0104108	n.s.	none
DDB_G0349321	DDB_G0349321	1.12507	0.915874	2.61986	0.0688997	5.46767	1.83736e-08	n.i.	none
DDB_G0292714	DDB_G0292714	1.07807	0.170475	1.02365	0.473215	1.58704	0.0279872	n.s.	none
DDB_G0273233	DDB_G0273233	0.144972	0.999718	1.26026	0.200745	2.26233	0.000230695	n.i.	there is a second copy of this gene, DDB_G0273677
DDB_G0291063	thoc2	-0.352525	0.999718	-0.411196	0.869032	-1.25772	0.00426003	n.i.	ortholog of human THOC2 and yeast RLR1, which exist in the THO complex required for transcriptional elongation
DDB_G0287131	gtf2f2	0.433221	0.999718	0.154264	0.999641	1.09896	0.0237479	n.s.	transcription initiation factor TFIIF beta subunit
DDB_G0289449	ubqF	1.05214	0.0633386	0.620774	0.559997	1.67365	8.05466e-05	n.i.	none
DDB_G0281699	DDB_G0281699	-0.101874	0.999718	-0.563469	0.736832	-1.11707	0.0300369	n.s.	none
DDB_G0269040	DDB_G0269040	-0.198691	0.999718	-0.664586	0.782829	-2.68487	1.67686e-06	-2.91879	similar to tenascin X
DDB_G0283345	comD	0.0296072	0.999718	1.26945	0.498806	4.08329	3.52776e-08	n.s.	similar to drug resistance transporters; contains 14 transmembrane domains
DDB_G0283163	eif2b5	0.233487	0.999718	0.449334	0.79867	1.44243	0.000324107	n.s.	EIF2B5 ortholog, the eukaryotic initiation factor 2B epsilon subunit; guanyl nucleotide exchange factor for eIF2; defects are linked to leukoencephalopathy with vanishing white matter
DDB_G0349136	DDB_G0349136	0.00376212	0.999718	1.14226	0.616826	2.96557	0.000202123	n.s.	none
DDB_G0270042	ascc3l	-0.077447	0.999718	-0.336647	0.942595	-0.894096	0.049218	n.s.	putative RNA helicase involved in the second step of RNA splicing; ortholog of human ASCC3L1 and yeast BRR2
DDB_G0282565	DDB_G0282565	0.489216	0.999718	1.50766	0.256701	1.96634	0.023272	n.i.	none
DDB_G0276657	npcB	-0.0433188	0.999718	1.0269	0.676862	1.98066	0.0200956	n.s.	one of two orthologs of NPC1 (with npcA), a Patch family protein, mutated in Niemann-Pick disease, a form of lipidosis characterized by the accumulation of unestrified cholesterol in the lysosomes; contains a signal peptide and 14 predicted transmembrane domains
DDB_G0284443	DDB_G0284443	0.0389605	0.999718	1.04733	0.769796	2.39956	0.00929057	n.s.	none
DDB_G0292360	DDB_G0292360	0.0666096	0.999718	-0.311243	0.999641	-1.624	0.0446352	n.i.	none
DDB_G0276261	mcfV	-0.213836	0.999718	0.253723	0.999641	3.55152	2.20434e-09	n.s.	belongs to the substrate carrier protein family involved in transport of molecules across the mitochondrial membrane
DDB_G0288145	purL	-0.544423	0.941514	-0.965989	0.240316	-2.18874	5.84392e-06	n.i.	catayzes the reaction ATP + 5'-phosphoribosyl-N-formylglycineamide + L-glutamine + H2O <=> ADP + phosphate + 5-phosphoribosyl-n-formylglycineamidine + L-glutamate in de novo DNA synthesis
DDB_G0269190	tcp1	0.0691431	0.999718	-0.462236	0.807647	-1.00833	0.0303886	n.s.	subunit of the chaperonin CCT ring complex involved in the folding of actin and tubulin
DDB_G0281869	DDB_G0281869	-0.337619	0.999718	0.836999	0.802678	2.10038	0.00650111	n.i.	none
DDB_G0276887	fbxA	-0.218239	0.999718	0.0174887	0.999641	1.35092	0.00397976	n.s.	F-box and WD40 domains containing protein; part of a complex that targets proteins for ubiquination; has the same domain composition as DDB_G0285445 and DDB_G0280895
DDB_G0276881	DDB_G0276881	0.979732	0.113036	1.19326	0.050783	1.11023	0.0345652	n.s.	contains one AN1-type zinc finger and one A20-type zinc finger; similar to A. thaliana SAP7 (stress-associated protein)
DDB_G0284325	DDB_G0284325	0.255322	NA	1.42421	0.832281	4.60313	0.000250153	n.s.	none
DDB_G0270308	DDB_G0270308	-0.270633	0.999718	1.3264	0.679768	2.3611	0.0355402	n.s.	none
DDB_G0291732	DDB_G0291732	0.26898	0.999718	-0.331907	0.962691	-0.965063	0.0439937	n.s.	belongs to the NADP_Rossman superfamily; similar to human NMRAL1; A. nidulans nmrA is a transcriptional regulator involved in nitrogen metabolite repression
DDB_G0278151	DDB_G0278151	0.0380808	0.999718	0.561997	0.621235	1.31804	0.0017918	n.s.	none
DDB_G0286677	DDB_G0286677	-0.614454	0.686689	-1.02777	0.428008	-2.0803	0.00165105	n.s.	none
DDB_G0267620	DDB_G0267620	-0.560326	NA	0.715701	0.999641	4.83508	0.000845124	n.s.	none
DDB_G0269254	sigJ	-0.543423	0.999718	-0.482082	0.942595	2.06878	0.000143427	-1.49098	weakly related to blackjack, a protein associated with microtubules but without similarity to MAPs; regulated by the MADS-box transcription factor SrfA during development; expressed in prespore cells
DDB_G0283577	DDB_G0283577	-0.313554	NA	2.43712	NA	4.76648	0.0480656	n.s.	none
DDB_G0283571	DDB_G0283571	0.857483	0.999718	2.39131	0.0544548	3.96395	1.21481e-05	n.s.	none
DDB_G0274105	glgB	-0.407803	0.999718	-0.650076	0.376688	-0.955267	0.0244122	-1.57482	transfers a segment of a 1,4-alpha-D-glucan chain to a primary hydroxyl group in a similar glucan chain
DDB_G0288497	DDB_G0288497	-0.207334	0.999718	4.67681	0.0501162	5.61334	0.00313114	n.s.	none
DDB_G0288947	DDB_G0288947	0.434194	0.999718	0.404046	0.873519	1.26343	0.00312616	n.s.	similar to Entamoeba histolytica viral A-type inclusion repeat-containing protein
DDB_G0275475	DDB_G0275475	-1.49962	0.105798	-0.841571	0.418359	2.12259	9.90337e-06	n.s.	none
DDB_G0282611	DDB_G0282611	0.365418	0.999718	0.679081	0.672846	1.32448	0.019874	n.i.	catalyzes the reactoin CTP + (R)-4'-phosphopantothenate + L-cysteine = CMP + diphosphate + N-[(R)-4'-phosphopantothenoyl]-L-cysteine
DDB_G0280327	DDB_G0280327	0.0113786	0.999718	-0.541105	0.796405	-1.51328	0.00312616	n.i.	none
DDB_G0273131	g6pd-1	0.244979	0.999718	-0.505689	0.764851	-1.34725	0.00260738	-1.0496	ortholog of the human G6PD; defects in G6PD cause chronic non-spherocytic hemolytic anemia (CNSHA); catalyzes the reaction D-glucose 6-phosphate + NADP+ = D-glucono-1,5-lactone 6-phosphate + NADPH + H+; there is a second copy of this gene, g6pd-2
DDB_G0287659	nagD	0.164328	0.999718	4.32493	0.180239	7.37746	0.000255057	n.s.	catalyses the hydrolysis of terminal non-reducing N-acetyl-D-hexosamine residues in N-acetyl-beta-D-hexosaminides
DDB_G0280141	DDB_G0280141	-0.291831	0.999718	0.344492	0.999641	1.79885	0.00310381	n.s.	none
DDB_G0284429	DDB_G0284429	-0.414918	0.999718	1.3782	0.744909	2.56849	0.0398749	n.s.	none
DDB_G0284793	DDB_G0284793	-0.160238	NA	2.13013	NA	6.54335	0.00658309	n.s.	belongs to the PLAC8 family (placenta-specific gene 8 protein), a family of cysteine-rich proteins with highly divergent, low complexity amino terminal regions
DDB_G0290595	DDB_G0290595	-1.10309	0.999718	1.44516	0.383408	4.44805	3.49586e-09	n.s.	none
DDB_G0274485	DDB_G0274485	0.503967	0.999718	1.4152	0.103987	1.55112	0.0237989	n.s.	none
DDB_G0278747	DDB_G0278747	-0.323576	0.999718	-0.495986	0.89932	-1.33602	0.0264534	n.s.	none
DDB_G0286651	aplB	0.775366	0.323665	-1.31291	0.142846	-1.53829	0.0220057	n.s.	contains three saposin B domains and a putative signal peptide
DDB_G0291648	lpd	0.162769	0.999718	-0.309002	0.970517	-0.92432	0.0446352	n.s.	common component of the three 2-oxoacid dehydrogenase complexes oxidizing pyruvate, 2-oxoglutarate, and the branched-chain 2-oxo acids and of the glycine cleavage system complex
DDB_G0282097	cxfA	0.0731068	0.999718	-0.246485	0.999641	-0.895022	0.0390653	n.s.	none
DDB_G0276633	DDB_G0276633	0.0569356	0.999718	1.07772	0.162218	1.96797	8.04088e-05	n.s.	none
DDB_G0284145	DDB_G0284145	-0.25734	0.999718	-0.0557605	0.999641	1.50076	0.019203	n.i.	none
DDB_G0276241	atp5e	0.252007	0.999718	-0.351214	0.906058	-0.885424	0.0398749	n.i.	epsilon subunit of the F1 sector of mitochondrial F1F0 ATP synthase, the enzyme complex responsible for ATP synthesis
DDB_G0292528	DDB_G0292528	-0.39355	0.999718	-0.660376	0.450397	-0.94378	0.0452719	n.s.	none
DDB_G0278357	DDB_G0278357	0.0237099	0.999718	-0.455224	0.820259	-1.00002	0.0364406	n.i.	none
DDB_G0288143	DDB_G0288143	-0.065734	0.999718	-0.359652	0.999641	-1.93835	0.0212342	n.s.	similar to lysozyme C proteins from insects; contains an additional serine-rich C-terminal region
DDB_G0288915	DDB_G0288915	0.11292	0.999718	0.283508	0.999641	1.4317	0.0184867	n.s.	none
DDB_G0289871	DDB_G0289871	1.93326	NA	4.25969	0.147839	5.22668	0.0147447	n.s.	none
DDB_G0293126	DDB_G0293126	-0.118317	0.999718	-0.472318	0.754046	-0.985402	0.0244812	n.s.	none
DDB_G0287307	gtf2e2	0.470129	0.999718	0.550523	0.636035	1.79938	3.7252e-06	n.s.	general transcription factor required for the initiation of transcription by RNA polymerase II
DDB_G0270368	DDB_G0270368	-1.52702	NA	1.2619	0.650595	2.56819	0.00943482	n.i.	contains 7 Dictyostelium (slime mold) repeats; nearly identical to DDB_G0270328; enriched in gametes
DDB_G0270362	zfand	0.814158	0.402102	-0.0742167	0.999641	1.29741	0.0258387	n.s.	none
DDB_G0270366	DDB_G0270366	-1.04651	0.999718	1.14122	0.810123	2.68402	0.0131437	n.i.	nearly identical to DDB_G0270330; enriched in gametes
DDB_G0276407	DDB_G0276407	3.03298	NA	1.8569	0.415742	5.59432	1.91621e-08	n.s.	none
DDB_G0274295	DDB_G0274295	-0.603391	0.84766	-0.308463	0.999641	-1.43899	0.0344883	n.s.	The RWP-RK domain is named after a conserved motif at its C-terminus; found in Chlamydomonas, plant proteins involved in nitrogen-controlled development, and in Dictyostelium
DDB_G0284469	gpaH	0.295737	0.999718	0.0583788	0.999641	1.21657	0.00923855	n.s.	subunit of the heterotrimeric G protein that has GTPase activity
DDB_G0277753	DDB_G0277753	0.341945	0.999718	-0.133113	0.999641	2.11159	0.0153614	n.s.	similar to cfaA
DDB_G0275537	cytC	0.122523	0.999718	-0.36536	0.886325	-1.22166	0.00190561	n.i.	none
DDB_G0289919	ponJ	-0.466692	0.999718	0.984908	0.986272	6.35776	1.60453e-08	n.i.	structurally similar to ponticulins
DDB_G0291310	DDB_G0291310	-0.324364	0.999718	-0.983765	0.256259	-1.40347	0.0129428	n.s.	none
DDB_G0291318	DDB_G0291318	0.259367	0.999718	-0.729317	0.345254	-1.06765	0.0197884	n.s.	has similarity to yeast mrp10, the mitochondrial ribosome 37 S subunit component
DDB_G0279463	DDB_G0279463	-0.158305	0.999718	-1.1607	0.786608	-3.17053	0.00993344	n.i.	none
DDB_G0292754	DDB_G0292754	0.354867	0.999718	1.03526	0.0829039	1.69843	8.15099e-05	n.s.	none
DDB_G0289481	glnS	0.149506	0.999718	0.326898	0.999641	1.60038	0.0017918	n.s.	induced by cycloheximide; catalyzes the reaction ATP + L-glutamine + tRNAGln = AMP + diphosphate + L-glutaminyl-tRNAGln
DDB_G0291840	gacEE	0.608929	0.999718	0.974357	0.373022	2.20946	6.52983e-05	n.s.	none
DDB_G0287461	abcG3	-0.998403	0.181999	-0.512699	0.875225	-2.85337	5.40594e-09	-1.64513	full transporter, consisting of two ABC domains and two transmembrane domains
DDB_G0280303	DDB_G0280303_ps	0.00737917	0.999718	0.662457	0.89932	1.79177	0.0187764	n.s.	putative pseudogene; similar to DDB_G0284189
DDB_G0270776	DDB_G0270776	0.928006	0.180868	0.890943	0.203392	1.47884	0.00109071	n.s.	conserved eukaryotic protein of unknown function; ortholog of human SPATA20 (spermatogenesis associated 20)
DDB_G0270774	DDB_G0270774	-0.284642	0.999718	0.883669	0.642207	2.00377	0.00316245	n.s.	none
DDB_G0270778	DDB_G0270778	0.209752	0.999718	1.19374	0.070623	2.72976	1.10022e-09	n.s.	none
DDB_G0293794	DDB_G0293794	1.08771	0.421005	1.07222	0.361041	2.29333	0.000169201	n.i.	none
DDB_G0292080	DDB_G0292080	-0.06531	0.999718	-0.526083	0.77944	-1.78474	9.63086e-05	n.s.	none
DDB_G0280161	mcfK	0.0662324	0.999718	0.271635	0.999641	1.63817	0.0398749	n.s.	belongs to the substrate carrier protein family involved in transport of molecules across the mitochondrial membrane
DDB_G0278725	p17	-0.0946617	0.999718	-0.125999	0.999641	-1.24719	0.00216352	n.s.	similar to DDB_G0291255; contains a predicted signal peptide
DDB_G0278729	repB	0.114649	0.999718	0.066201	0.999641	1.18555	0.0248592	n.s.	ortholog of H. sapiens xeroderma pigmentosum group B (XPB), M. musculus ERCC3, and S. cerevisiae RAD25; upregulated in the presence of DNA damaging agents
DDB_G0270112	DDB_G0270112	0.712447	0.662277	0.568558	0.820259	1.33859	0.0201476	n.s.	none
DDB_G0268600	uduB	1.71878	0.000111469	-0.340837	0.914593	2.80255	1.03698e-16	n.s.	upregulated in the uninfected dupAmutant
DDB_G0279705	aplE	-0.177269	0.999718	0.916948	0.999641	3.368	0.0345317	n.s.	none
DDB_G0278655	DDB_G0278655	-0.425301	0.999718	2.66662	0.0931351	2.84417	0.0247022	n.s.	none
DDB_G0271640	DDB_G0271640	-0.582313	0.999718	-1.03564	0.839503	-3.28618	0.0120314	n.s.	none
DDB_G0267570	DDB_G0267570	-0.794336	0.399687	0.349261	0.999641	-1.46479	0.0263074	n.s.	none
DDB_G0277569	DDB_G0277569	0.693799	0.887371	0.932931	0.406685	1.47739	0.0155407	-1.24052	members of this family are membrane proteins involved in long chain fatty acid elongation systems that produce 26-carbon precursors for ceramide and sphingolipid synthesis; contains 7 putative transmembrane domains
DDB_G0272048	DDB_G0272048	0.752993	0.497305	0.613443	0.636387	1.71429	0.000137872	n.s.	none
DDB_G0285079	DDB_G0285079	0.111259	0.999718	-0.452207	0.757943	-0.907688	0.0330734	n.i.	none
DDB_G0286393	DDB_G0286393	1.0696	0.126866	0.850488	0.471888	2.03175	0.000186799	n.i.	the C-terminal half is similar to a D. purpureum protein
DDB_G0281823	tpp1F	0.646618	0.574788	-0.721298	0.921637	-2.39611	0.00525751	n.s.	belongs to the family of tripeptidyl peptidases in Dictyostelium; contains a predicted signal peptide, and a peptidase S8/S53 domain
DDB_G0282767	DDB_G0282767	0.203749	0.999718	-0.646824	0.501112	-0.957563	0.0495026	1.61369	none
DDB_G0291127	mvpB	1.04636	0.159277	0.867713	0.858557	2.27249	0.0150893	n.s.	none
DDB_G0293468	mybS	-0.426258	0.999718	-0.354258	0.999641	-1.70774	0.0223521	n.s.	contains one Myb DNA-binding domain
DDB_G0291125	gnrA	-0.130001	0.999718	-0.329217	0.942595	-0.879842	0.0449928	n.s.	none
DDB_G0287323	DDB_G0287323	0.28467	0.999718	-1.16471	0.642207	-1.96125	0.048186	n.s.	contains an N-terminal oxidoreductase domain and a partial C-terminal oxidoreductase domain; the Gfo/Idh/MocA family proteins utilize NADP or NAD
DDB_G0287329	DDB_G0287329	0.775303	0.584437	0.244639	0.999641	2.00414	7.62339e-07	n.i.	none
DDB_G0278117	sec61b	0.20599	0.999718	-0.198138	0.999641	-0.965155	0.0282058	n.i.	beta subunit of the SEC61 complex (composed of Sec61a, Sec61b, Sec61g) involved in protein targeting to the membrane
DDB_G0276421	DDB_G0276421	0.226253	0.999718	0.107796	0.999641	4.06987	3.79003e-06	n.i.	none
DDB_G0271344	idhA	0.145945	0.999718	-0.616698	0.648696	-1.04267	0.047312	n.s.	catalyzes the reaction isocitrate + NAD+ <=> 2-oxoglutarate + CO2 + NADH
DDB_G0277827	cafA	-0.745787	0.815464	-1.66328	0.0812278	3.36174	9.79412e-08	n.s.	Nomenclature conflict: Do not confuse this gene with the subunits (DDB_G0287815, DDB_G0269800) of the chromatin assembly factor 1 (CAF1)
DDB_G0287255	gcvP	-0.190871	0.999718	-1.242	0.116337	-2.01026	0.000315085	n.s.	catalyzes the reaction glycine + H-protein-lipoyllysine <=> H-protein-S-aminomethyldihydrolipoyllysine + CO2
DDB_G0269212	abcG11	-0.926723	0.261597	0.0402055	0.999641	-3.37292	1.04162e-07	n.i.	full transporter, consisting of two ABC domains and two transmembrane domains
DDB_G0292680	DDB_G0292680	-0.0373989	0.999718	-0.680231	0.42557	-1.32548	0.00247399	n.s.	none
DDB_G0275081	DDB_G0275081	0.656654	0.694585	-0.394789	0.920988	1.12971	0.0193144	n.s.	similar to bacterial proteins of the YjgF superfamily; homolog of Psedomonas sp. amnD (2-aminomuconate deaminase); also matches PFAM HMM for endoribonuclease L-PSP
DDB_G0285001	DDB_G0285001	0.0805867	0.999718	2.07937	0.0800121	2.10133	0.0305234	n.s.	none
DDB_G0275557	DDB_G0275557	-0.0722272	0.999718	-0.113684	0.999641	3.41702	0.000249161	n.s.	none
DDB_G0288985	purN	-0.0236798	0.999718	-1.13224	0.0701575	-1.91922	2.7902e-05	n.i.	catalyzes the reaction N10-formyl-H4F + 5-phospho-ribosyl-glycineamide <=> tetrahydrofolate + 5'-phosphoribosyl-N-formylglycineamide in de novo DNA synthesis
DDB_G0288983	mrpl3	0.00121297	0.999718	-0.599047	0.454299	-1.21458	0.00196361	n.s.	protein component of the mitochondrial large ribosomal subunit
DDB_G0281831	DDB_G0281831	0.0501168	0.999718	0.476937	0.946346	1.73235	0.00293096	n.s.	conserved in bacteria; a member of the NK (nucleoside/nucleotide kinase) superfamily; also belongs to the zeta toxin family, which in bacteria is a component of a postregulational killing system
DDB_G0274701	DDB_G0274701	1.08858	0.887012	0.824285	0.749122	4.27058	3.9539e-13	-1.46767	none
DDB_G0278913	DDB_G0278913	-1.41512	0.716005	1.37207	0.693642	2.70907	0.0174046	n.s.	none
DDB_G0290885	DDB_G0290885	0.549569	0.800431	0.188612	0.999641	3.53806	6.72646e-18	n.s.	conserved Dictyostelium protein, contains a putative signal sequence; underexpressed in gskA-and zakA-null mutants
DDB_G0270750	DDB_G0270750	0.336791	0.999718	0.600587	0.913787	3.6678	7.01417e-10	n.s.	contains six kelch repeats, which are known to be involved in various biological processes
DDB_G0274441	psiL	-0.388179	0.999718	0.503241	0.794118	1.23702	0.00955276	-2.51848	contains a signal peptide, a PA14 (anthrax protection antigen) domain, 4 Dictyostelium (CTDC) repeats and a C-terminal transmembrane domain
DDB_G0284535	cyp508A4	0.0482745	0.999718	-0.595605	0.714871	-1.57493	0.00139444	n.s.	none
DDB_G0278915	DDB_G0278915	-0.42289	0.999718	1.37067	0.674521	2.73255	0.0139023	n.s.	none
DDB_G0286053	DDB_G0286053	-0.576717	0.999718	-0.679751	0.969199	-2.4808	0.0238237	n.s.	none
DDB_G0286051	leo1	0.0724459	0.999718	-0.66017	0.455661	-0.954857	0.0435189	n.s.	component of the conserved Paf1 complex, a multifunctional complex, involved in histone methylation and plays a role in RNA elongation and processing
DDB_G0269970	DDB_G0269970	-0.261633	0.999718	0.922004	0.934715	2.29646	0.0496396	n.s.	none
DDB_G0282055	DDB_G0282055	0.998485	0.445995	0.619579	0.943947	1.64147	0.0437103	n.s.	none
DDB_G0271666	prtB	-0.101336	0.999718	-0.723568	0.45501	1.60729	0.000452209	n.s.	cAMP-responsive gene
DDB_G0287987	elp	-0.279981	0.999718	0.632827	0.861989	1.63642	0.0142504	n.s.	similar to elongation factor 2 (EF-2) but lacks the EF-Tu binding domain 2 and EF-G domain; EF-2 translocates peptidyl-tRNA from the aminoacyl site to the peptidyl site on the ribosome during protein synthesis
DDB_G0289225	DDB_G0289225_ps	-1.24877	0.999718	3.94773	0.345254	7.20796	0.000904186	n.i.	putative pseudogene; partial, similar to IPT/TIG domain-containing proteins, e.g DDB_G0295757
DDB_G0272476	DDB_G0272476	-0.252821	0.999718	-0.797909	0.251923	-1.11082	0.0146697	n.s.	none
DDB_G0286419	cyp519E1	-1.04107	0.71159	-0.091603	0.999641	2.0306	0.0197884	n.s.	none
DDB_G0291722	DDB_G0291722	-2.24369	0.400702	0.167563	0.999641	3.50097	0.0212097	n.s.	none
DDB_G0269766	DDB_G0269766	-0.180573	0.999718	-0.447549	0.837592	-1.45042	0.00104814	n.i.	similar to UPF0451 family proteins; contains 3 predicted transmembrane domains; there is an almost identical gene, DDB_G0270942upstream
DDB_G0269762	DDB_G0269762	-0.155804	0.999718	-1.0576	0.0557059	-1.06274	0.0218338	n.s.	none
DDB_G0269768	cnrI	0.378451	0.999718	-0.338493	0.942595	-1.0713	0.0126314	n.s.	identified as a suppressor of smlA null mutant cnr9
DDB_G0287805	DDB_G0287805	0.87014	0.378936	0.823449	0.484746	1.48726	0.00838323	n.s.	contains a putative N-terminal signal sequence and one predicted C-terminal transmembrane domain
DDB_G0274165	DDB_G0274165	0.387208	0.999718	0.395769	0.999641	2.51329	0.00525751	n.s.	none
DDB_G0268412	DDB_G0268412	0.29123	0.999718	1.19023	0.292217	2.06103	0.00177435	n.s.	none
DDB_G0270934	DDB_G0270934	0.748637	0.625825	1.11672	0.201695	1.7066	0.00312717	n.s.	none
DDB_G0291922	taz	0.512868	0.999718	0.637649	0.820259	1.81214	0.00319686	n.s.	ortholog of S. cerevisiae TAZ1 and H. sapiens tafazzin, implicated in Barth syndrome
DDB_G0282647	DDB_G0282647	-0.0538179	0.999718	-0.118841	0.999641	3.09716	0.00459536	n.i.	weakly similar to Rab small GTPases
DDB_G0293424	DDB_G0293424	0.218858	0.999718	-0.0374793	0.999641	-1.32753	0.00160725	n.s.	none
DDB_G0350652	axeB	0.0416922	0.999718	-0.385123	0.95121	2.32112	3.73166e-08	n.i.	this locus has been identified by Bloomfield 2015 et al.as the large deletion that allows axenic strains to grow by fluid uptake; the gene fragment represented here encodes the C-terminal 296 amino acids of the Dictyostelium RasGAP neurofibromin 1, the complete protein is 2605 amino acids long (W6K4Y2) in strain DdB; the deletion of axeB shows its function in macropinocytosis and phagocytosis
DDB_G0291358	cct2	0.0108205	0.999718	-0.559467	0.537494	-0.942408	0.0256537	n.s.	subunit of the chaperonin CCT ring complex involved in the folding of actin and tubulin
DDB_G0287467	gluS	0.276639	0.999718	0.221294	0.999641	1.6391	0.000247014	n.s.	catalyzes the reaction ATP + L-glutamate + tRNAGlu = AMP + diphosphate + L-glutamyl-tRNAGlu
DDB_G0292972	DDB_G0292972	-0.196092	0.999718	1.29643	0.093527	1.80476	0.00171246	n.s.	similar to hypothetical bacterial protein; contains a weak SIR2 domain
DDB_G0272396	DDB_G0272396	0.0141233	0.999718	0.509023	0.81901	1.98895	9.39957e-06	n.s.	contains a putative signal peptide and two predicted transmembrane domains
DDB_G0284551	fut4	0.545575	0.999718	1.25667	0.0621785	1.76897	0.000493011	n.s.	CAZy family GT10; some proteins in the GT10 family help form the basis of blood group antigens
DDB_G0274429	DDB_G0274429	-0.29636	0.999718	-0.154662	0.999641	1.46523	0.0197884	n.s.	none
DDB_G0288397	DDB_G0288397	1.37799	NA	1.66134	0.731036	3.19153	0.0268741	n.i.	none
DDB_G0288863	agpC	0.212768	0.999718	0.843011	0.243366	1.12356	0.0191474	n.s.	belongs to the acyltransferase superfamily
DDB_G0275389	tom70	-0.222183	0.999718	-0.755226	0.415014	-1.29077	0.0088558	n.i.	ortholog of human Mitochondrial import receptor subunit TOM34; component of the TOM complex, responsible for import of nuclear-encoded proteins into the mitochondria
DDB_G0274391	alfA	0.0691291	0.999718	0.549039	0.999641	2.68274	0.0214136	n.s.	Dictyostelium enzyme that hydrolyses O- and S-glycosyl compounds with a preference for cleaving the alpha1-6-O-fucolsyl bonds in fucosylated oligosaccharides; secreted during development
DDB_G0278095	mecr	0.0509642	0.999718	-0.320319	0.942595	-0.863317	0.0436337	n.s.	ortholog of the mammalian MECR and S. cerevisiae ETR1, a mitochondrial 2-enoyl thioester reductase that belongs to the zinc-containing alcohol dehydrogenase family
DDB_G0293210	sgmB	-1.02656	0.166533	0.163722	0.999641	1.48891	0.000108706	-2.19296	hydrolyze the phosphodiester bond in sphingomyelin to form ceramide
DDB_G0278275	rpe	-0.0195912	0.999718	-0.788592	0.240542	-1.47425	0.000325555	n.s.	catalyzes the reaction D-ribulose 5-phosphate <=> D-xylulose 5-phosphate
DDB_G0279059	DDB_G0279059	0.507129	0.903086	-0.901509	0.231231	-1.3629	0.00544249	n.i.	none
DDB_G0287099	DDB_G0287099	1.01352	0.492065	1.62253	0.287283	3.24069	0.000116092	n.s.	none
DDB_G0286277	DDB_G0286277	0.502581	0.999718	0.180696	0.999641	1.61668	0.00286177	n.s.	CAZy family GH9; catalyzes the hydrolysis of glucosidic linkages
DDB_G0267534	DDB_G0267534	-0.265815	0.999718	-0.640942	0.498832	-0.973658	0.0422641	n.s.	none
DDB_G0292926	iliQ	0.520838	0.999718	2.96391	7.60394e-10	3.30861	3.64157e-13	n.s.	contains a large ankyrin repeat region; induced by Legionella pneumophila infection
DDB_G0281625	DDB_G0281625	-0.405999	0.999718	2.41921	0.603053	4.19607	0.0238019	n.s.	conserved hypothetical protein present in bacteria, nematodes, plants, and fungi
DDB_G0272002	egeA	0.822134	0.912682	0.320135	0.999641	1.58362	0.0037884	-1.0905	none
DDB_G0290299	DDB_G0290299	0.212001	0.999718	-0.796837	0.24901	-1.01755	0.0279945	n.s.	none
DDB_G0275603	DDB_G0275603	0.0631909	0.999718	-0.1603	0.999641	-0.871071	0.0491767	n.s.	none
DDB_G0273357	DDB_G0273357	1.4184	NA	0.902423	0.999641	4.5985	0.00707671	n.s.	there is a second copy of this gene, DDB_G0273733
DDB_G0280883	act38_ps	0.2141	NA	3.96582	0.29493	7.36763	0.000369379	n.i.	putative pseudogene, contains a partial actin domain
DDB_G0283281	DDB_G0283281	0.733336	0.709538	0.176357	0.999641	1.85064	0.0026432	n.s.	catalyzes the reaction tryptamine + secologanin = 3-alpha(S)-strictosidine + H2O in alkaloid biosynthesis
DDB_G0284947	ucr	0.0349844	0.999718	-0.310259	0.962419	-1.1456	0.00630927	n.s.	conserved ubiquinol-cytochrome c oxidoreductase subunit, a component of the mitochondrial inner membrane electron transport chain
DDB_G0271628	dlpC	-0.746409	0.815464	-0.543673	0.867925	1.38667	0.0150467	n.s.	none
DDB_G0271472	DDB_G0271472	1.17261	0.999718	1.4943	0.256701	2.34848	0.00397976	n.i.	none
DDB_G0268122	DDB_G0268122	-0.418807	0.999718	1.39187	0.160904	2.51438	8.04088e-05	n.i.	none
DDB_G0271292	DDB_G0271292	-0.310673	0.999718	-1.24835	0.086437	-1.49387	0.0090191	n.s.	none
DDB_G0285939	ctnnA	-0.106627	0.999718	0.546902	0.820215	1.19868	0.0330734	n.s.	catenin/vinculin family protein; binds to aardvark, the Dictyostelium beta-catenin related protein; required for the formation of a polarized epithelium at the culminant tip and thus for stalk formation during culmination
DDB_G0276027	pdeE	-0.202512	0.999718	0.539467	0.820215	1.59051	0.00186605	n.s.	none
DDB_G0267490	ChLim	-1.19782	0.895656	0.482181	0.957423	1.39876	0.0349622	n.s.	contains a N-terminal Calponin Homology (CH) domain, 3 LIM domains, and 4 LIM-related domains (LRDs)
DDB_G0276121	DDB_G0276121	-0.447222	0.999718	-1.16884	0.0982084	-1.56325	0.00336333	n.s.	none
DDB_G0293788	DDB_G0293788	-0.16985	0.999718	-1.09004	0.508645	-3.85834	2.34667e-06	3.46149	contains a predicted signal peptide
DDB_G0284713	polB	-0.207912	0.999718	0.474592	0.978912	2.08643	0.000940399	n.s.	similar to yeast Pol4 and mammalian DNA polymerase beta; involved in repair of DNA double-strand breaks by non-homologous end joining (NHEJ)
DDB_G0274745	DDB_G0274745	0.0583282	0.999718	0.288555	0.999641	1.03784	0.0429979	n.s.	none
DDB_G0277291	DDB_G0277291	-0.0922687	NA	2.205	0.150699	2.85173	0.0089047	n.s.	conserved Dictyostelium protein; contains a putative N-terminal signal sequence, a C-terminal anchoring transmembrane domain and one EGF-like domain
DDB_G0286163	DDB_G0286163	0.869551	0.58528	1.28195	0.302262	3.07222	4.07235e-06	n.s.	none
DDB_G0275831	DDB_G0275831	-0.201725	0.999718	-1.05597	0.0948225	-1.20313	0.0158653	n.s.	none
DDB_G0270718	DDB_G0270718	0.700283	0.766362	1.29419	0.108581	1.29765	0.0447707	n.s.	contains a predicted signal peptide
DDB_G0274407	DDB_G0274407	0.223579	0.999718	-0.576774	0.625271	-1.08696	0.0192886	n.s.	none
DDB_G0283473	treh	-0.729143	0.540794	-0.514285	0.706431	-1.21562	0.00470214	n.s.	homolog of human TREH; catalyzes the reaction alpha,alpha-trehalose + H2O = 2 D-glucose; contains a predicted signal peptide
DDB_G0268332	uduA1	0.476977	0.999718	-1.13185	0.207443	1.32885	0.0314231	n.s.	almost identical to uduA2, uduA3
DDB_G0279137	DDB_G0279137	0.184338	0.999718	-0.496442	0.77944	-1.36843	0.00209665	n.s.	catalyzes the reaction 5-methyltetrahydrofolate + NADP+ = 5,10-methylenetetrahydrofolate + NADPH + H+ in various biosynthetic pathways
DDB_G0287003	DDB_G0287003	-0.471761	0.982293	-1.41159	0.0819166	-1.36021	0.0432868	-2.69597	contains 10 putative transmembrane domains
DDB_G0270094	DDB_G0270094_ps	1.80495	NA	4.0694	0.0688997	7.72324	4.86057e-07	n.i.	putative pseudogene; highly similar to DDB_G0272877, DDB_G0270088
DDB_G0278647	DDB_G0278647	1.53807	0.313606	2.21532	0.54391	3.79812	0.0184867	n.i.	contains structural similarity to terpenoid synthase domain
DDB_G0269426	rbdB	0.644524	0.999718	0.993907	0.690895	2.68709	0.000460025	n.s.	contains a double-stranded RNA-binding motif in the amino terminus
DDB_G0285893	DDB_G0285893	0.201057	0.999718	0.0709577	0.999641	-1.64127	0.000385429	n.s.	similar to other Dictyostelium hypothetical proteins; contains a putative signal peptide
DDB_G0283727	DDB_G0283727	-0.747851	0.400251	0.0177658	0.999641	-1.27023	0.0323706	-1.24014	none
DDB_G0277503	amtA	-0.193992	0.999718	-0.267121	0.999641	-1.32726	0.00207327	n.s.	involved in transporting ammonia out of the cell
DDB_G0286389	rpl34	0.198704	0.999718	-0.408473	0.820933	-0.868007	0.0446352	n.s.	protein component of the large (60S) ribosomal subunit
DDB_G0291496	DDB_G0291496	0.532239	0.999718	2.25543	0.376152	3.4127	0.0160091	n.s.	none
DDB_G0292610	DDB_G0292610	0.679807	0.485218	-0.218624	0.999641	-0.984854	0.0237479	n.s.	contains one putative transmembrane domain
DDB_G0291145	msrB	-0.0886145	0.999718	0.0837248	0.999641	-1.10158	0.0176189	n.i.	catalyzes the reaction L-methionine + oxidized thioredoxin = L-methionine R-oxide + reduced thioredoxin
DDB_G0280067	DDB_G0280067	-0.591842	0.831462	-0.875922	0.279374	-1.43806	0.00352592	n.i.	similar to T-cell activation protein phosphatase 2C; the protein phosphatase 2C-related domain occurs in protein phosphatase 2C (PPC2) as well as in other proteins, such as pyruvate dehydrogenase (lipoamide)]-phosphatase and adenylate cyclase
DDB_G0271832	DDB_G0271832	-0.36548	0.999718	0.574986	0.760831	1.3374	0.00945896	n.s.	none
DDB_G0278801	DDB_G0278801	0.298862	0.999718	1.10418	0.160183	1.87386	0.00029273	n.i.	none
DDB_G0278803	dus1l	0.293287	0.999718	0.911832	0.161494	1.82284	1.35232e-05	n.i.	ortholog of S. cerevisiae DUS1 and the animal DUS1L; catalyzes the synthesis of dihydrouridine, a modified base found in the D-loop of tRNAs
DDB_G0283261	acoA	-0.520028	0.943139	0.853763	0.379635	1.59997	0.00223143	-1.08	catalyzes the reaction acyl-CoA + O2 <=> trans-2,3-dehydroacyl-CoA + H2O2<br> <b>Nomenclature conflict:</b> Do not confuse this gene with aco, the oxidoreductase, or aco1 and aco2, the aconitases
DDB_G0277087	purH	-0.232225	0.999718	-0.670845	0.438481	-1.74238	1.79014e-05	-1.56508	bifunctional enzyme that catalyzes the reactions N10-formyl-H4F + AICAR <=> tetrahydrofolate + phosphoribosyl-formamido-carboxamide and phosphoribosyl-formamido-carboxamide <=> IMP + H2O; expressed in prespore cells
DDB_G0275027	DDB_G0275027	0.162979	0.999718	-1.17938	0.0832555	-1.18594	0.0325787	n.s.	none
DDB_G0274217	lsrA	0.239817	0.999718	0.515662	0.769796	1.76373	4.08266e-05	n.s.	ortholog of H. sapiens transcription factor 25 (TCF25)
DDB_G0277883	dhkJ	-1.99562	0.261014	1.56058	0.420443	2.16975	0.0415509	n.s.	none
DDB_G0278807	DDB_G0278807	0.685736	0.844917	0.842979	0.716281	1.7973	0.0122254	n.i.	contains no functional domains and is not similar to any other protein
DDB_G0279487	DDB_G0279487	-0.308373	0.999718	-0.4706	0.790251	-0.998778	0.0307764	n.s.	ortholog of yeast GCN1 and human GCN1L1
DDB_G0287227	trxE	0.122196	0.999718	-0.475385	0.920988	-1.19087	0.0499908	n.s.	small disulphide-containing redox protein that serves as a general protein disulphide oxidoreductase
DDB_G0285917	DDB_G0285917	-0.382681	0.999718	-0.244273	0.999641	4.30562	1.63145e-11	n.s.	none
DDB_G0293538	dcd2A	-0.46732	0.970261	0.84564	0.172769	0.933498	0.0427714	n.s.	ceramidase bearing more similarity with neural and alkaline ceramidases; however pH optimum of the enzyme is 3
DDB_G0278999	DDB_G0278999	-0.198844	0.999718	0.110124	0.999641	-1.19749	0.0252071	n.i.	conserved in bacteria and plants; there is an almost identical gene, DDB_G0278997upstream
DDB_G0287593	abcC6	0.857207	0.628624	0.556274	0.978912	2.18638	0.00427384	n.s.	full transporter, consisting of two ABC domains and two transmembrane domains
DDB_G0292844	DDB_G0292844	0.503673	0.999718	-0.561992	0.86817	-1.7074	0.00648967	n.s.	none
DDB_G0277315	DDB_G0277315	-0.660783	0.999718	1.1744	0.652133	2.19304	0.0212097	n.s.	none
DDB_G0281075	DDB_G0281075	0.334822	0.999718	0.349108	0.979366	2.24193	2.77679e-07	n.s.	none
DDB_G0293166	DDB_G0293166	0.244905	0.999718	0.84478	0.517864	1.31533	0.0372004	n.s.	none
DDB_G0291952	DDB_G0291952	-0.369064	0.999718	-0.0539064	0.999641	2.29114	0.0161365	n.s.	similar to bacterial pro-kumamolisin activation domain; occurs in amoebozoa; expressed in prespore cells
DDB_G0289385	DDB_G0289385	-0.349055	0.999718	-0.579195	0.836835	-1.30282	0.0404559	n.s.	none
DDB_G0281313	DDB_G0281313	-0.377344	0.999718	0.167299	0.999641	-1.46573	0.047813	n.s.	none
DDB_G0273083	DDB_G0273083	0.0872674	0.999718	0.39251	0.988629	1.31159	0.0308049	n.s.	member of the Dyp-type peroxidase family lacking a typical heme-binding region; does not appear to be present in higher organisms; there is a second copy of this gene, DDB_G0273789
DDB_G0270196	DDB_G0270196	-0.235047	0.999718	-0.636054	0.498832	-0.966255	0.0419794	n.s.	similar to the mitochondrial import inner membrane translocase subunit TIM50
DDB_G0269996	rnf10	0.0609007	0.999718	1.04341	0.290618	1.69566	0.0038636	n.s.	putative ortholog of mammalian RNF10
DDB_G0269442	DDB_G0269442	-0.282247	0.999718	-0.852425	0.287283	-1.52476	0.00144342	n.s.	none
DDB_G0285741	prdx5	0.00283578	0.999718	-0.169857	0.999641	-0.907293	0.0324298	n.s.	ortholog of peroxiredoxin 5
DDB_G0270850	DDB_G0270850	-0.901788	0.513329	-1.36297	0.537006	-5.4057	1.03386e-06	n.i.	none
DDB_G0295725	DDB_G0295725	-0.276215	0.999718	0.438656	0.814783	0.961632	0.0315936	n.i.	conserved prokaryotic protein
DDB_G0281545	acaA	-0.260903	0.999718	0.16925	0.999641	2.09618	0.019214	n.s.	twelve transmembrane domain adenylyl cyclase expressed during aggregation; essential for streaming in early development
DDB_G0280041	pyr56	-0.260613	0.999718	-1.4098	0.161856	-2.05942	0.00337188	n.s.	bifunctional enzyme that catalyzes the reactions PRPP + orotate <=> orotidine-5'-phosphate + pyrophosphate and orotidine-5'-phosphate <=> CO2 + UMP in de novo biosynthesis of pyrimidine ribonucleotides
DDB_G0280047	yelA	-0.174059	0.999718	0.65961	0.851128	1.74386	0.0103206	n.s.	involved in the regulation of terminal differentiation
DDB_G0287383	DDB_G0287383	0.250993	0.999718	0.0755954	0.999641	2.25285	0.00769391	n.s.	none
DDB_G0279013	nola1	-0.100427	0.999718	-1.43347	0.123695	-1.49513	0.0410508	n.s.	component of the H/ACA small nucleolar ribonucleoprotein (H/ACA snoRNP) complex required for pre-mRNA processing and pseudouridylation
DDB_G0286059	asns	0.423433	0.999718	-0.363971	0.960253	1.33558	0.00540927	n.s.	catalyzes the reaction H2O + L-glutamine + L-aspartate + ATP -> L-glutamate + L-asparagine + pyrophosphate + AMP
DDB_G0283021	sodB	0.839699	0.40453	0.588822	0.652926	2.67414	5.75952e-11	-1.28	upregulated upon oxidative stress
DDB_G0269878	fbl	-0.0785793	0.999718	-1.48338	0.0654145	-1.58516	0.0158575	n.s.	utilizes the methyl donor S-adenosyl-L-methionine to catalyze the site-specific 2'-hydroxyl methylation of ribose moieties in pre-ribosomal RNA
DDB_G0293370	DDB_G0293370	-0.643862	0.999718	-0.690181	0.782786	-1.64573	0.0146535	n.s.	none
DDB_G0271350	DDB_G0271350	0.0794414	0.999718	0.898752	0.508645	1.75185	0.00461715	n.i.	none
DDB_G0267730	dst2	-0.487154	0.999718	-0.204868	0.999641	-1.08941	0.0197696	n.s.	putative protein serine/threonine kinase; the kinase domain is similar to mitogen-activated protein kinases and other STE20-like kinases; stress-responsive kinase
DDB_G0272965	DDB_G0272965	0.26168	0.999718	0.132412	0.999641	1.28785	0.00774834	-1.25156	none
DDB_G0276065	DDB_G0276065	-0.295213	0.999718	0.557181	0.559997	1.12775	0.00572806	n.i.	catalyzes the reaction acyl-CoA + O2 <=> trans-2,3-dehydroacyl-CoA + H2O2
DDB_G0276067	ddcB	0.335017	0.999718	-0.552486	0.615198	-1.27144	0.00217461	-1.67699	similar to diaminopimelate decarboxylase, which catalyzes the reaction meso-2,6-diaminoheptanedioate = L-lysine + CO2
DDB_G0288475	DDB_G0288475	-1.45492	0.967884	0.711027	0.885049	1.79877	0.0264797	n.s.	similar to comF
DDB_G0267454	ancA	-0.122618	0.999718	-0.141141	0.999641	-1.61925	8.72563e-06	1.00476	ortholog of human SLC25A4, which catalyzes the exchange of ADP and ATP across the mitochondrial inner membrane; contains six predicted transmembrane domains
DDB_G0290371	DDB_G0290371	0.503911	0.999718	1.09975	0.376546	2.48037	7.59599e-05	n.s.	contains one putative transmembrane domain
DDB_G0290723	mkcB	-0.534937	0.932976	-0.177962	0.999641	-1.28545	0.0432868	n.i.	similar to Dictyostelium mkcA and other mitogen-activated protein kinases (Ste20/PAK family); REMI mutant forms aberrant fruiting bodies
DDB_G0290891	gacL	-0.116799	0.999718	0.407512	0.894266	1.15964	0.012033	-1.12402	none
DDB_G0285351	DDB_G0285351	-0.102043	0.999718	-1.03276	0.0865811	-2.09055	1.03386e-06	-1.8	none
DDB_G0290133	DDB_G0290133	0.38205	0.999718	-0.254375	0.999641	1.49591	0.0330734	n.i.	none
DDB_G0302511	rpl39	0.252652	0.999718	-0.473824	0.754046	-1.28737	0.00166844	n.i.	protein component of the large (60S) ribosomal subunit
DDB_G0277333	DDB_G0277333	-0.768953	0.403569	-1.15914	0.124042	-1.61904	0.00340412	1.7574	none
DDB_G0281053	DDB_G0281053	-0.21797	0.999718	0.212262	0.999641	1.80139	0.000246659	n.i.	conserved hypothetical Dictyostelium protein; similar to bacterial ubiquinone/menaquinone biosynthesis methyltransferase ubiE
DDB_G0272374	prpf6	-0.0196324	0.999718	-0.169341	0.999641	-1.28966	0.0117201	n.s.	component of the U5 sRNP complex; may act in the tri-snRNP complex as a bridging factor between U5 and U4/U6 snRNPs
DDB_G0277257	DDB_G0277257	-0.00318874	0.999718	-0.649684	0.423912	-1.37934	0.000734336	n.s.	none
DDB_G0277253	mscS	0.373804	0.999718	0.137755	0.999641	3.03835	3.14184e-08	n.s.	contains mechanosensitive (MS) channel domain which provides protection against hypo-osmotic shock; expressed in pstO cells
DDB_G0280455	ascc2	0.20497	0.999718	0.879062	0.71363	1.6391	0.036831	n.s.	ortholog of human ASCC2, part of the TRIP4 complex that enhances activation of NF-kappa-B, SRF, and AP1
DDB_G0278039	rpb8	0.0278272	0.999718	-0.330047	0.978912	-1.08499	0.0303886	n.i.	subunit common to RNA polymerases I, II and III; ortholog of S. cerevisiae RPB8
DDB_G0270200	DDB_G0270200	0.221482	0.999718	0.754403	0.462591	1.10023	0.0412318	n.s.	none
DDB_G0270204	crtp3	0.389356	0.999718	-0.46747	0.893996	-1.19889	0.03004	n.s.	similar to Plasmodium falciparum CRT, which confers resistance to chloroquine; contains 10 predicted transmembrane domains
DDB_G0271552	DDB_G0271552	0.0177376	0.999718	0.539319	0.648696	1.04046	0.0188268	-2.5913	contains one SAM (sterile alpha motif) domain and PH (pleckstrin homology) domain
DDB_G0287047	DDB_G0287047	1.08686	NA	1.07293	0.635661	5.53442	6.61358e-17	n.i.	none
DDB_G0278781	pah	-0.707818	0.452772	0.749621	0.617097	1.52605	0.00870314	n.s.	catalyzes the reaction L-phenylalanine + tetrahydrobiopterin + O2 <=> L-tyrosine + 4a-hydroxytetrahydrobiopterin
DDB_G0269606	DDB_G0269606	0.0939196	0.999718	1.30177	0.809434	2.58045	0.0466748	n.s.	none
DDB_G0278735	fps	-0.180765	0.999718	-0.323292	0.944516	-0.891381	0.0409548	n.s.	target for bisphosphonate drugs; catalyzes the reaction geranyl diphosphate + isopentenyl diphosphate <=> diphosphate + trans,trans-farnesyl diphosphate
DDB_G0269464	DDB_G0269464	-0.114304	0.999718	-1.34256	0.393906	-1.81684	0.0496809	n.i.	none
DDB_G0279789	DDB_G0279789	-0.0791144	0.999718	1.41905	0.484243	2.25908	0.0240294	n.i.	none
DDB_G0285507	clp1	0.225316	0.999718	0.430775	0.839503	1.03155	0.0240592	n.s.	ortholog of the conserved CLP1 protein; S. cerevisiae CLP1 is involved in both the endonucleolytic cleavage and polyadenylation steps of mRNA 3'-end maturation; Mammalian CLP1 is a subunit of cleavage complex IIA, which is required for cleavage, but not for polyadenylation of pre-mRNA
DDB_G0290727	DDB_G0290727	0.584621	0.960954	1.27355	0.193305	1.53251	0.0267306	n.s.	none
DDB_G0283763	grpE	0.0887966	0.999718	-1.2269	0.126831	-1.35835	0.0283147	1.81687	similar to S. cerevisiae MGE1, and H. sapiens GrpE, involved in protein import into mitochondria
DDB_G0270836	fbp	-0.0664349	0.999718	1.35955	0.146641	1.89725	0.00446565	n.s.	hydrolyses D-fructose 1,6-bisphosphate to D-fructose 6-phosphate and phosphate (EC 3.1.3.11)
DDB_G0293582	DDB_G0293582	-0.425031	0.999718	0.836298	0.491958	1.57704	0.00567485	n.s.	none
DDB_G0275667	DDB_G0275667	-0.0156934	0.999718	0.0687964	0.999641	1.20901	0.037788	n.s.	homolog of human and S. cerevisiae KTI12 (killer toxin insensitivity protein 12); S. cerevisiae KTI12 interacts with the Elongator complex, a component of the elongating form of RNA polymerase II
DDB_G0275663	ippA	0.330672	0.999718	0.650733	0.628429	1.3521	0.00787162	n.s.	converts 1D-myo-inositol 1,4-bisphosphate + H2O to 1D-myo-inositol 4-phosphate + phosphate
DDB_G0275669	DDB_G0275669	-0.144053	0.999718	-0.941274	0.284325	1.92034	3.84743e-05	1.04357	involved in proline metabolism; catalyzes the reaction L-proline + acceptor = (S)-1-pyrroline-5-carboxylate + reduced acceptor
DDB_G0282417	DDB_G0282417	0.352108	0.999718	0.842805	0.40518	1.52134	0.00394402	n.s.	similar to Arabidopsis thaliana receptor-like protein kinase
DDB_G0284929	DDB_G0284929	3.30615	NA	1.26985	0.999641	7.52653	0.000243362	n.i.	none
DDB_G0284259	DDB_G0284259	-0.238526	0.999718	-0.738901	0.230724	-0.852788	0.0479788	-1.32792	none
DDB_G0284255	DDB_G0284255	-0.0209719	0.999718	1.24164	0.102793	2.6536	1.27403e-07	n.s.	none
DDB_G0288019	DDB_G0288019	0.969031	0.690991	1.26601	0.0655247	2.19686	9.06167e-06	n.s.	none
DDB_G0288011	DDB_G0288011	-0.764297	0.364257	-0.193019	0.999641	0.987904	0.0251801	1.15829	none
DDB_G0291025	DDB_G0291025	0.374822	0.999718	1.64602	0.0851138	1.80714	0.0171742	n.s.	none
DDB_G0275069	pks16	-0.514799	0.885883	-0.916423	0.137642	-1.34648	0.00211947	-4.22	fatty acid synthases catalyze the formation of long-chain fatty acids from acetyl-CoA, malonyl-CoA and NADPH; multifunctional protein with several catalytic activities and an acyl carrier protein; enriched in gametes
DDB_G0270018	DDB_G0270018	-0.239034	0.999718	-0.98473	0.0518794	-0.991797	0.0200775	-3.33598	none
DDB_G0293036	ddx5	-0.961196	0.400995	-1.16843	0.359861	-1.66806	0.0282383	n.s.	ortholog of H. sapiens DDX5
DDB_G0293030	mileS	-0.421364	0.999718	-0.687506	0.486771	-1.17501	0.0168338	n.s.	catalyzes the reaction ATP + L-isoleucine + tRNAIle = AMP + diphosphate + L-isoleucyl-tRNAIle
DDB_G0269816	DDB_G0269816	-0.160705	0.999718	-0.189104	0.999641	1.95251	0.0220306	n.s.	ortholog of the mammalian kin17 protein, a zinc finger nuclear protein
DDB_G0274159	hisS	0.391751	0.999718	0.18244	0.999641	2.07549	1.58756e-08	1.20409	catalyzes the reaction ATP + L-histidine + tRNAHis = AMP + diphosphate + L-histidyl-tRNAHis
DDB_G0278575	DDB_G0278575	-0.349685	0.999718	0.321373	0.991869	1.07921	0.0345826	n.s.	none
DDB_G0278577	DDB_G0278577	-0.195792	0.999718	0.530447	0.948465	1.53409	0.029784	n.s.	contains one putative transmembrane domain; contains a predicted signal sequence; similar to D. purpureum protein
DDB_G0279225	DDB_G0279225	0.673432	0.790987	1.00252	0.226582	1.70133	0.00103233	n.s.	none
DDB_G0280703	DDB_G0280703	1.65737	0.226034	3.84585	0.22049	7.01649	0.000341439	n.s.	none
DDB_G0290063	DDB_G0290063	-0.119151	0.999718	1.89302	0.170819	2.50865	0.00901148	n.s.	conserved Dictyostelium protein; contains a putative N-terminal signal sequence, a C-terminal anchoring transmembrane domain and one EGF-like domain; enriched in gametes
DDB_G0349279	DDB_G0349279	0.356506	0.999718	0.276651	0.999641	1.63543	0.0422641	n.s.	none
DDB_G0279859	DDB_G0279859	0.557425	NA	1.07962	0.862828	2.66884	0.0182496	n.i.	conserved Dictyostelium protein; contains 2 EGF-like domains; contains both a predicted N-terminal signal sequence and C-terminal transmembrane domain
DDB_G0279855	mrps10	0.0563469	0.999718	-0.673737	0.385961	-1.11821	0.00954097	1.01291	protein component of the small ribosomal subunit
DDB_G0278013	DDB_G0278013	0.827688	0.473265	0.56868	0.886325	1.49561	0.0213691	-3.65349	none
DDB_G0289551	DDB_G0289551	0.192961	0.999718	1.14616	0.199755	1.95727	0.000560567	-1.04027	none
DDB_G0281049	DDB_G0281049	-0.335689	0.999718	0.694658	0.872203	1.61039	0.0432868	n.s.	none
DDB_G0270480	DDB_G0270480	-0.714841	0.950025	-1.02729	0.491787	-1.77817	0.0167393	n.i.	none
DDB_G0285529	DDB_G0285529	0.715298	0.999718	1.21781	0.776379	2.96934	0.005025	n.i.	none
DDB_G0283785	DDB_G0283785	2.3927	NA	2.61118	0.433652	5.79804	0.000149657	n.s.	contains 2 EGF-like domains, a predicted signal sequence and one N-terminal transmembrane domain; very similar to it's upstream and downstream neighbors, DDB_G0283787, DDB_G0283869 , and also a conserved family in D. purpureum
DDB_G0272885	fslJ-1	-0.926048	0.999718	0.274999	0.999641	2.34239	2.82291e-05	n.s.	identified as a suppressor of smlA null mutant cnr1; putative cell number regulator; there is a second copy of this gene, fslJ-2
DDB_G0276865	clcB	-1.00921	0.540794	1.25289	0.21199	2.6453	8.94828e-06	n.s.	CLC chloride channels are conserved from prokaryotes to mammals where they play broad physiological roles; they assemble to form homo-dimers
DDB_G0269088	DDB_G0269088	0.735886	0.999718	2.05608	0.110656	4.7458	6.60176e-09	n.s.	none
DDB_G0271680	DDB_G0271680	1.27533	0.915874	-1.87314	0.409721	2.65905	0.00479552	n.i.	none
DDB_G0289039	DDB_G0289039	1.03599	0.999718	0.878451	0.999641	4.8481	0.000528587	n.i.	none
DDB_G0276335	pyr1-3	-0.547722	0.967369	-1.33591	0.147366	-1.78763	0.00708934	n.s.	multifunctional enzyme that carries out the three first enzymatic activities of the de novo pyrimidine biosynthetic pathway; very similar to the tri-functional human CAD enzyme
DDB_G0276331	pyr4	-0.351002	0.999718	-1.10683	0.111843	-1.85532	0.000152745	-1.14305	catalyzes the reaction O2 + dihydroorotate = H2O2 + orotate in de novo biosynthesis of pyrimidine ribonucleotides
DDB_G0269884	DDB_G0269884	0.270751	0.999718	0.689861	0.729629	1.96944	0.00029942	n.s.	none
DDB_G0274661	DDB_G0274661	0.295961	0.999718	-0.508607	0.916211	1.49783	0.0141508	-1.5547	expressed in prespore cells
DDB_G0274669	DDB_G0274669	-0.775856	0.326046	0.339532	0.972207	1.24638	0.0085649	n.s.	none
DDB_G0284279	DDB_G0284279_ps	0.753495	0.999718	0.233788	0.999641	2.79461	0.000932375	n.i.	putative pseudogene; fragment; similar to D. discoideum gene DDB_G0276559
DDB_G0274273	DDB_G0274273	0.341385	0.999718	0.634755	0.674521	1.28279	0.0160739	n.s.	none
DDB_G0271740	DDB_G0271740	-0.268976	0.999718	-2.39275	0.811059	3.30072	0.0330734	n.i.	none
DDB_G0269348	DDB_G0269348	-0.035545	0.999718	0.347146	0.978912	1.19817	0.0169659	n.s.	none
DDB_G0290659	sdrA	-0.4903	0.976584	-0.556969	0.865031	-1.35597	0.029392	n.s.	none
DDB_G0290689	DDB_G0290689	0.351213	0.999718	1.25651	0.346992	1.75313	0.0276213	n.i.	homolog of E. coli rppH; very similar to DDB_G0286883
DDB_G0274355	DDB_G0274355	0.801924	0.723817	-0.810421	0.360657	-2.21447	1.67964e-06	n.s.	none
DDB_G0281763	DDB_G0281763	0.123538	0.999718	-0.968469	0.0701575	1.04926	0.015481	n.i.	RNA-binding protein; similar to human SSB (Sjoegren Syndrome type B antigen) that plays a role in the transcription of RNA polymerase III, and yeast LHP1 protein, a molecular chaperone which is required for maturation of tRNA and snRNA precursors
DDB_G0284927	DDB_G0284927	-0.2704	NA	3.5848	NA	6.38473	0.00680595	n.i.	this is one of four almost identical genes on C4 (DDB_G0284931, DDB_G0285043, DDB_G0284925), and there is an additional very similar gene (DDB_G0271770) on C2
DDB_G0274875	rnf160	0.0799697	0.999718	0.454731	0.832281	1.37417	0.00200231	n.s.	putative ortholog of mammalian RNF160
DDB_G0286383	DDB_G0286383	-0.758444	0.611583	-0.577248	0.817427	-1.74945	0.00210049	n.s.	none
DDB_G0283591	DDB_G0283591	-0.0400902	0.999718	0.678548	0.785122	1.30217	0.0492565	n.s.	none
DDB_G0273063	dscA-1	-0.287704	0.999718	-0.224163	0.999641	5.82324	2.29101e-31	n.s.	there is a second copy of this gene, dscA-2
DDB_G0273061	cinD-1	0.862307	0.442549	0.842108	0.250084	1.35899	0.00312918	n.i.	ortholog of Saccharomyces cerevisiae Mbf1 protein; expressed at high level in vegetative celly and decreases sharply in early development; induced by cycloheximide; there is a second copy of this gene, cinD-2
DDB_G0273067	dscD-1	0.0894586	0.999718	-0.741294	0.839503	4.94503	2.05719e-14	n.s.	there is a second copy of this gene, dscD-2
DDB_G0273065	dscC-1	0.210961	0.999718	-0.295635	0.999641	3.5903	7.08185e-17	n.i.	there is a second copy of this gene, dscC-2
DDB_G0286581	DDB_G0286581	-0.267492	0.999718	0.141044	0.999641	1.39006	0.00453065	n.s.	none
DDB_G0269642	mak16l	-0.560548	0.9119	-1.15229	0.239147	-1.54025	0.0191474	n.s.	ortholog of S. cerevisiae MAK16 and mammalian RBM13; inyeast an essential nuclear protein, constituent of 66S pre-ribosomal particles
DDB_G0286583	DDB_G0286583	0.860039	0.286381	1.10067	0.18288	2.0096	0.000140096	n.s.	none
DDB_G0288221	DDB_G0288221	1.3541	0.999718	1.63976	0.198047	2.0206	0.0240109	n.s.	none
DDB_G0286351	DDB_G0286351	0.360732	0.999718	2.13207	0.318059	3.13662	0.0129472	n.s.	similar to the cudA transcriptional regulator; REMI mutant forms aberrant fruiting bodies
DDB_G0268518	DDB_G0268518	-0.126758	0.999718	-0.559639	0.814922	-1.59789	0.00364062	1.07437	none
DDB_G0286895	grlD	0.541617	0.862422	-0.490484	0.999641	-2.6122	0.00511447	n.s.	metabotropic glutamate receptors are coupled to G-proteins and stimulate the inositol phosphate/Ca2+ intracellular signaling pathway; distinctive '7TM' signature
DDB_G0284103	mybZ	0.167351	0.999718	0.69048	0.761338	1.81267	0.00271944	n.s.	contains one Myb DNA-binding domain
DDB_G0268180	DDB_G0268180	-0.632393	0.999718	1.41694	0.118971	2.5593	2.45184e-05	n.s.	none
DDB_G0282685	DDB_G0282685	-0.334308	0.999718	1.02259	0.0670541	1.25349	0.00426003	-2.13504	none
DDB_G0276513	DDB_G0276513	-0.234499	0.999718	-0.437701	0.942595	-2.19024	2.57167e-05	n.s.	none
DDB_G0269368	DDB_G0269368	0.546169	0.999718	0.496363	0.872203	1.71225	0.000693071	n.s.	similar to human SYS1 which is involved in protein trafficking; contains 4 putative transmembrane domains
DDB_G0288831	cox17	-0.14814	0.999718	-0.195222	0.999641	-1.48281	0.000867266	n.i.	none
DDB_G0284223	DDB_G0284223	0.913185	0.220496	0.0939759	0.999641	1.01042	0.0297658	n.s.	none
DDB_G0292992	helA	-0.780744	0.671934	-1.11331	0.115816	-1.46018	0.00572483	n.s.	none
DDB_G0275899	DDB_G0275899	-0.280632	0.999718	0.209999	0.999641	-1.12899	0.0409548	n.s.	contains 12 putative transmembrane domains; similar to D. purpureum protein
DDB_G0284537	DDB_G0284537	-1.17597	0.424981	0.576215	0.965948	1.87878	0.0197696	n.s.	none
DDB_G0280215	DDB_G0280215	-0.669634	0.999718	1.08579	0.999641	4.38946	0.00898447	n.s.	large molecular weight protein that contains a hsp20 domain
DDB_G0280749	act35_ps	0.0860414	0.999718	0.135974	0.999641	1.46405	0.0159425	n.i.	putative pseudogene; contains a partial actin domain
DDB_G0273003	snrpD3	0.118043	0.999718	-0.518975	0.721917	-1.05331	0.0227861	n.s.	none
DDB_G0276087	DDB_G0276087	0.821406	0.999718	0.137526	0.999641	2.21553	0.0297227	n.s.	none
DDB_G0277837	cxgE	0.409056	0.999718	-0.255691	0.999641	-1.91804	7.91159e-06	n.s.	none
DDB_G0283435	DDB_G0283435	0.173241	0.999718	1.65415	0.615198	2.70641	0.0391784	n.i.	none
DDB_G0279095	ptsA	-0.23776	0.999718	-0.584787	0.91752	-1.57112	0.0349622	n.i.	catalyzes the reaction 6-(L-erythro-1,2-dihydroxypropyl 3-triphosphate)-7,8-dihydropterin <=> 6-(1,2-dioxopropyl)-5,6,7,8-tetrahydropterin + triphosphate
DDB_G0291434	pdi2	0.0482996	0.999718	-0.390885	0.893996	-0.96568	0.036831	n.s.	catalyzes the rearrangement of disulfide bonds in proteins
DDB_G0282475	gxcF	-0.61126	0.936088	1.46335	0.0639514	2.2772	8.30514e-05	n.s.	none
DDB_G0273393	DDB_G0273393	0.15286	0.999718	1.07559	0.68722	2.17659	0.0145075	n.i.	there is a second copy of this gene, DDB_G0273591
DDB_G0269756	DDB_G0269756	-0.11237	0.999718	-0.683624	0.397612	-0.949195	0.0406047	n.s.	belongs to the crotonase superfamily
DDB_G0271892	DDB_G0271892	-0.12616	0.999718	-0.206847	0.999641	-1.27989	0.00397976	-1.08	similar to bacterial glutathione S-transferase; catalyzes the reaction RX + glutathione <=> HX + R-S-glutathione
DDB_G0271894	DDB_G0271894	-0.161696	0.999718	-0.682954	0.472202	-1.23949	0.00830639	n.s.	none
DDB_G0281607	DDB_G0281607	-0.286697	0.999718	0.725032	0.999641	4.87521	0.000102309	n.s.	none
DDB_G0282113	DDB_G0282113	-0.589087	0.981304	-0.184287	0.999641	1.41614	0.0218376	n.s.	none
DDB_G0287149	DDB_G0287149	0.24625	0.999718	0.482391	0.989741	1.67877	0.0237178	n.s.	similar to mammalian DNA polymerase kappa (POLK), and E. coli dinB, a translesion DNA repair polymerase
DDB_G0283603	rab32A	0.574749	0.78196	-0.850887	0.177032	-1.19926	0.00622461	n.s.	similar to rab32 and rab38
DDB_G0283609	cbpG	-0.0316372	0.999718	1.07003	0.702415	2.57268	0.00231639	n.i.	none
DDB_G0292860	DDB_G0292860	0.53505	0.999718	0.664513	0.684708	2.20865	7.9441e-06	n.s.	none
DDB_G0274369	DDB_G0274369	0.0346876	0.999718	4.30026	0.231783	6.48609	0.00389096	n.s.	none
DDB_G0283861	DDB_G0283861	-0.0225271	0.999718	-1.03607	0.109868	-1.07383	0.0367805	n.s.	none
DDB_G0277627	tgrR2	-0.23532	NA	4.84633	0.118139	7.16845	0.000943458	n.s.	none
DDB_G0295683	DDB_G0295683	0.147709	0.999718	-0.959712	0.324663	-1.60413	0.00473362	n.i.	none
DDB_G0295681	DDB_G0295681	0.07423	0.999718	-0.532548	0.61583	-1.13791	0.00538285	n.i.	none
DDB_G0287973	DDB_G0287973	-0.151151	0.999718	0.863659	0.157903	2.46532	3.96415e-11	n.i.	none
DDB_G0280117	DDB_G0280117	1.0064	0.999718	1.07236	0.390441	1.95587	0.00297291	n.s.	none
DDB_G0279387	rpl21	0.255654	0.999718	-0.31223	0.990019	-1.24078	0.00943482	n.s.	protein component of the large (60S) ribosomal subunit
DDB_G0279823	DDB_G0279823	-0.22131	0.999718	-0.590567	0.539613	-1.04885	0.017725	n.s.	none
DDB_G0279827	ivdA	-0.184237	0.999718	-0.29897	0.96588	-0.925809	0.032762	n.s.	catalyzes the reaction 3-methylbutanoyl-CoA + acceptor = 3-methylbut-2-enoyl-CoA + reduced acceptor
DDB_G0283455	DDB_G0283455	-0.16422	0.999718	0.510943	0.904924	1.32458	0.0318303	n.i.	none
DDB_G0270390	DDB_G0270390	0.51619	0.929703	0.41777	0.944516	1.35676	0.011287	n.s.	none
DDB_G0288269	fslE	-1.61157	NA	2.54235	0.159796	5.65806	2.13204e-07	n.s.	similar to G-protein-coupled receptors; weak frizzled cystein-rich domain; predicted to have 7 transmembrane domains and a putative signal peptide
DDB_G0288267	thrS1	-0.20052	0.999718	0.0222232	0.999641	2.36661	1.60453e-08	n.s.	catalyzes the reaction ATP + L-threonine + tRNAThr = AMP + diphosphate + L-threonyl-tRNAThr
DDB_G0288261	fslG	-0.0421368	0.999718	1.86626	0.354897	2.98799	0.00764437	n.s.	similar to the G-protein coupled receptors; contains 7 putative transmembrane domains and a putative signal peptide
DDB_G0272734	DDB_G0272734	-1.06764	NA	-1.19124	0.776949	2.3352	0.0181355	n.s.	none
DDB_G0278471	DDB_G0278471	0.189379	0.999718	-0.781013	0.290618	-1.69198	5.77379e-05	n.s.	none
DDB_G0278477	sarB	-0.00579785	0.999718	-1.24748	0.311417	-2.09599	0.00552993	n.s.	weakly similar to budding yeast Sar1, a 21 kDa GTP- binding protein involved in vesicular transport between the endoplasmic reticulum and the Golgi
DDB_G0269790	gaa	-0.0834223	0.999718	-0.219601	0.999641	-0.931259	0.0449928	-2.49754	ortholog of the H. sapiens lysosomal alpha-glucosidase which is essential for the degradation of glygogen to glucose in lysosomes; defects in GAA are the cause of glycogen storage disease II, a recessive disorder which results in a massive accumulation of glycogen in muscle, heart and liver leading to a life expectancy of less than two years
DDB_G0270642	DDB_G0270642	-0.834665	0.686689	-1.97215	0.338694	-6.67164	0.000344201	1.35583	none
DDB_G0287985	DDB_G0287985	-0.0524594	0.999718	0.00301081	0.999641	-1.1218	0.0216759	n.s.	none
DDB_G0276493	eIF6	0.266068	0.999718	-0.151082	0.999641	1.27575	0.0370878	1.55116	prevents 60S and 40S ribosomal subunits to form the 80S ribosome by binding to the 60S subunit; in Dictyosteliium, nutrition uptake stimulates gene expression
DDB_G0272867	argS1	0.438428	0.999718	-0.169986	0.999641	1.24802	0.00166185	n.s.	catalyzes the reaction ATP + L-arginine + tRNAArg = AMP + diphosphate + L-arginyl-tRNAArg
DDB_G0272861	cosA	-0.0538582	0.999718	-0.102259	0.999641	-0.996719	0.0339099	n.s.	belongs to the costars family; similar to the C terminal region of mammalian striated muscle activator of Rho signaling
DDB_G0285859	gxcP	-0.26278	0.999718	0.73404	0.950517	1.95481	0.0469739	n.s.	none
DDB_G0278891	DDB_G0278891	-0.624275	0.883964	-0.0656093	0.999641	1.40103	0.0483057	n.s.	none
DDB_G0290541	DDB_G0290541	-0.109587	0.999718	-0.817637	0.478615	-1.26032	0.0333405	n.i.	none
DDB_G0277455	plbE	-0.23987	0.999718	-0.480071	0.683271	-0.932349	0.0238534	-2.9	similar to plbA, which catalyzes the hydrolysis of phosphatidylcholine to glycerophosphocholine
DDB_G0280533	lmcB	0.137643	0.999718	-0.319643	0.957423	-1.618	2.93852e-05	n.i.	vegetative-specific gene repressed at the onset of development
DDB_G0349375	DDB_G0349375	-0.272159	0.999718	-0.715159	0.513922	-1.29168	0.0141802	n.i.	none
DDB_G0275915	DDB_G0275915	-0.321181	0.999718	-0.0210647	0.999641	-1.08111	0.0432868	n.i.	none
DDB_G0275917	DDB_G0275917	-0.295202	0.999718	-1.02324	0.0829039	-1.28536	0.00478976	-1.37872	none
DDB_G0288093	DDB_G0288093	0.763484	0.389389	0.447634	0.837629	1.06728	0.0236585	n.s.	contains a putative N-end rule-based degradation signal, which targets a protein for ubiquitin-dependent proteolysis
DDB_G0288793	DDB_G0288793	0.221538	0.999718	0.757872	0.961376	2.44962	0.0140323	n.s.	none
DDB_G0285725	dhps	0.305962	0.999718	0.108644	0.999641	1.27061	0.0085649	1.08	catalyzes the first step in the formation of deoxyhypusine: [eIF5A]-lysine + spermidine = [eIF5A]-deoxyhypusine + propane-1,3-diamine, an essential post-translational modification only found in mature eIF5A factor; the second reaction is catalyzed by Dohh
DDB_G0267792	DDB_G0267792	-0.401169	0.999718	1.25149	NA	6.64032	0.00525751	n.s.	none
DDB_G0290565	DDB_G0290565_ps	-0.0127101	0.999718	0.539208	0.931513	1.73598	0.00619551	n.s.	none
DDB_G0269890	DDB_G0269890	0.402173	0.999718	0.672609	0.643832	1.11459	0.0498651	n.s.	ortholog of human APOA1BP, S. pombe mug182
DDB_G0269322	DDB_G0269322	-0.473525	0.999718	-0.503082	0.804686	1.18083	0.0148748	n.s.	none
DDB_G0290629	DDB_G0290629	0.0610274	0.999718	1.02818	0.418739	1.94147	0.00247011	n.s.	none
DDB_G0283663	ppiD	-0.0250464	0.999718	-0.637792	0.405703	-0.879189	0.044054	n.s.	ortholog of the mammalian PPID; peptidyl-prolyl cis-trans isomerase (PPIase) accelerates protein folding by catalyzing the cis-trans isomerization of proline imidic peptide bonds in oligopeptides
DDB_G0275357	DDB_G0275357	-0.0434364	0.999718	-0.0380991	0.999641	1.27311	0.0240109	n.i.	none
DDB_G0268948	DDB_G0268948	-0.688833	0.462643	-0.719897	0.358518	-1.63061	7.66811e-05	n.s.	contains a SAM (and some other nucleotide) binding motif; similar to bacterial and eukaryotic methyltransferases
DDB_G0290191	DDB_G0290191	-0.911565	0.999718	1.16361	0.979954	3.51028	0.0371484	n.s.	none
DDB_G0290195	DDB_G0290195	0.93109	0.999718	4.01822	0.0558286	4.86892	0.00334269	n.i.	none
DDB_G0273043	DDB_G0273043	-0.647101	0.865998	-0.666788	0.769796	-1.76207	0.003981	-1.81911	conserved Dictyostelium protein; contains a putative N-terminal signal sequence, a C-terminal anchoring transmembrane domain and one EGF-like domain; there is a second copy of this gene, DDB_G0273961
DDB_G0287955	DDB_G0287955	1.50477	NA	4.4326	0.0856665	6.15465	0.00121767	n.s.	none
DDB_G0271916	rtoA	-1.26123	0.134532	0.729982	0.890042	2.16179	0.00787162	n.s.	contains several repeats of a serine-rich motif, which catalyzes the fusion of phospholipid vesicles
DDB_G0270552	DDB_G0270552	0.262034	0.999718	0.721434	0.442126	1.70307	0.000138717	n.s.	contains one C2H2-type zinc finger motif and 2 ankyrin repeats; contains 2 predicted coiled-coil domains
DDB_G0279933	DDB_G0279933	0.155358	0.999718	0.912927	0.408732	1.64287	0.00411399	n.s.	none
DDB_G0279935	DDB_G0279935	2.07259	0.463872	-0.111444	0.999641	4.50228	5.61135e-05	n.s.	contains one C2 domain, which is is a Ca2+-dependent membrane-targeting module found in many cellular proteins involved in signal transduction or membrane trafficking; contains a predicted peroxisomal targeting signal
DDB_G0270408	DDB_G0270408	1.51791	0.15828	1.6858	0.0688997	3.33876	1.43741e-07	n.s.	none
DDB_G0283471	DDB_G0283471	-0.264808	0.999718	0.611475	0.98188	1.95207	0.0303886	n.i.	none
DDB_G0275167	dstD	0.138003	0.999718	0.26856	0.999641	0.96768	0.0410741	n.s.	none
DDB_G0275163	DDB_G0275163	-0.461121	0.999718	-0.00930952	0.999641	4.28901	6.82295e-12	-1.16104	none
DDB_G0288281	DDB_G0288281	0.215268	0.999718	0.412623	0.836604	1.30954	0.00112697	n.i.	similar to metallothioneins that are involved in the cellular sequestration of toxic metal ions
DDB_G0288289	rliF	-0.394894	0.999718	0.0979511	0.999641	-1.7064	0.00062099	n.s.	very similar to bacterial beta-xylosidases and also but less similar to mammalian alpha-L-iduronidase; repressed after Legionella pneumophila infection
DDB_G0272754	gsr	-0.199448	0.999718	-0.0864082	0.999641	-0.898916	0.0327819	n.s.	converts oxidized glutathione to reduced glutathione
DDB_G0275295	galE	-0.348681	0.999718	-0.438428	0.865031	-1.01212	0.0425305	n.s.	catalyzes the reaction UDP-glucose <=> UDP-galactose; expressed in prespore cells
DDB_G0293416	abcB1	-0.910429	0.221236	0.13208	0.999641	-1.07365	0.0432868	n.s.	half transporter, consisting of one ABC domain and one transmembrane domain
DDB_G0272807	DDB_G0272807	0.442227	0.999718	-0.0634181	0.999641	1.55463	0.0083683	n.s.	there is a second copy of this gene, DDB_G0273949
DDB_G0271134	celA	-0.273435	0.999718	0.353687	0.999641	3.94571	1.6827e-18	n.i.	CAZy family GH9; catalyzes the hydrolysis of glucosidic linkages
DDB_G0285161	dagA	-0.247384	0.999718	0.46116	0.960253	1.36582	0.0330734	n.s.	pleckstrin homology (PH) domain protein required for receptor-mediated activation of adenylyl cyclase
DDB_G0272114	orfR1062	-0.24152	0.999718	0.294241	0.999641	1.46643	0.0017918	n.s.	none
DDB_G0277473	DDB_G0277473	0.0599294	0.999718	-0.105067	0.999641	-1.25021	0.0175351	n.s.	none
DDB_G0270984	rpl36a	0.208881	0.999718	-0.606095	0.557834	-1.21499	0.00635914	n.i.	protein component of the large (60S) ribosomal subunit
DDB_G0289273	DDB_G0289273	0.677182	0.62923	-0.255067	0.999641	2.41048	1.90221e-06	n.s.	none
DDB_G0272232	DDB_G0272232	0.073207	0.999718	-0.408029	0.861989	-0.99584	0.0277892	n.s.	contains two putative transmembrane domains
DDB_G0289275	DDB_G0289275	0.311602	0.999718	2.12354	0.0513921	3.515	9.39957e-06	n.s.	none
DDB_G0291388	DDB_G0291388	-0.68416	NA	0.886431	0.999641	5.9661	0.00331918	n.i.	none
DDB_G0272582	maoB-1	-1.03704	0.862422	2.095	0.356535	5.12351	3.35364e-06	n.s.	catalyzes the reaction RCH2NH2 + H2O + O2 = RCHO + ammonia + H2O2; acts on primary amines, as well as on some secondary and tertiary amines; there is a second copy of this gene, maoB-2
DDB_G0295807	DDB_G0295807	-1.19856	0.153153	0.478904	0.999641	-2.77451	0.000243362	n.i.	none
DDB_G0283869	DDB_G0283869	0.0878395	0.999718	1.00415	0.376546	2.05868	0.000428342	n.i.	contains 3 EGF-like domains, a predicted signal sequence and one N-terminal transmembrane domain; very similar to it's two downstream neighbors, DDB_G0283785, DDB_G0283787 , and also a conserved family in D. purpureum
DDB_G0288203	DDB_G0288203	0.285587	0.999718	0.641928	0.474906	1.51748	0.000238252	n.s.	amino terminal region is similar to the interferon-related developmental regulator family; contains one HEAT repeat; similar to D. purpureum protein
DDB_G0283391	kinX	-0.293901	0.999718	-0.591286	0.572259	-1.33206	0.00188818	n.s.	member of the TKL (tyrosine kinase-like) group and the LISK (LIM domain and testis-specific kinase) family; similar to LIM kinases which regulate actin dynamics
DDB_G0290397	fthS	-0.570726	0.828321	-1.01001	0.251341	-1.83506	0.000618892	1.02092	catalyzes the reaction ATP + formate + tetrahydrofolate <=> ADP + phosphate + N10-formyl-H4F in various biosynthetic pathways; in plants and in Dictyostelium, this is a monofunctional enzyme, while in yeast and in metazoan the same enzyme has two additional activities, encoded by DDB_G0283121
DDB_G0290395	DDB_G0290395	-0.0874787	0.999718	-0.634779	0.49568	-1.17354	0.00875045	n.s.	none
DDB_G0275333	DDB_G0275333	0.858719	0.333166	0.612096	0.808982	1.24361	0.0470813	n.s.	none
DDB_G0277667	DDB_G0277667	-0.0109403	0.999718	0.780112	0.773411	3.07292	8.17319e-07	n.s.	uncharacterized conserved protein with cyclin domain
DDB_G0282921	ctu1	-0.0296571	0.999718	0.447637	0.904924	1.0778	0.047813	n.s.	ortholog of S. pombe ctu1 (cytosolic thiouridylase subunit 1); with ctu2, required for thiolation of the uridine at the wobble position of Lys(UUU) and Glu(UUC) tRNAs
DDB_G0268074	DDB_G0268074	-0.698587	0.967369	-1.09612	0.346059	-1.52113	0.0323741	n.s.	none
DDB_G0275741	dio3	-0.609934	0.999718	0.539178	0.788757	2.01404	6.48701e-06	n.s.	contains a selenocysteine (U) residue at position 113; similar to animal Type III iodothyronine deiodinase (DIO3); catalyzes the reaction 3,3',5'-triiodo-L-thyronine + iodide + A + H(+) = L-thyroxine + AH(2)
DDB_G0275743	DDB_G0275743	0.821823	0.999718	2.08325	0.0701575	3.19073	0.000131982	n.s.	none
DDB_G0268534	DDB_G0268534	0.035661	0.999718	-0.792944	0.23126	-1.09916	0.0129428	n.s.	none
DDB_G0267584	adcE	0.410684	0.999718	0.323414	0.987909	1.93333	7.91159e-06	n.s.	none
DDB_G0267586	DDB_G0267586	0.0135336	0.999718	-0.242161	0.999641	1.063	0.0459089	n.s.	none
DDB_G0289907	DDB_G0289907	-0.755405	0.65183	0.653575	0.615198	-1.53731	0.00261672	-1.65682	none
DDB_G0284353	osbI	0.433933	0.999718	1.19065	0.160183	1.99683	0.000427082	n.s.	none
DDB_G0281093	rpl37A	0.164761	0.999718	-0.302882	0.964407	-1.05316	0.0125235	n.i.	protein component of the large (60S) ribosomal subunit
DDB_G0287553	rab7B	1.09478	0.105476	0.340586	0.958809	1.05473	0.0237178	n.s.	there is another rab7 homolog, rab7A
DDB_G0291828	DDB_G0291828	-0.131273	0.999718	-0.743446	0.361041	-1.1225	0.017865	n.s.	none
DDB_G0280857	DDB_G0280857	-0.841837	0.999718	1.57566	0.163865	2.38279	0.0017918	n.i.	none
DDB_G0291926	DDB_G0291926	0.111857	0.999718	0.444634	0.86817	1.10477	0.0259094	n.s.	weakly similar ro S. cerevisiae Arc1, a protein that binds tRNA and methionyl- and glutamyl-tRNA synthetases, delivering tRNA to them, stimulating catalysis, and ensuring their localization to the cytoplasm
DDB_G0274383	pdeD	-0.0882569	0.999718	-0.164137	0.999641	-1.01623	0.0415369	n.s.	contains one beta-lactamase domain and two cNMP-binding domains
DDB_G0271336	DDB_G0271336	0.118589	0.999718	-0.615905	0.566916	-1.02724	0.032762	n.s.	none
DDB_G0293542	DDB_G0293542	0.220826	0.999718	0.0116134	0.999641	3.68709	1.86708e-11	n.s.	none
DDB_G0271480	DDB_G0271480	-0.276022	0.999718	0.872399	0.836901	2.78285	0.000857985	n.s.	none
DDB_G0273425	rpc25-1	0.14407	0.999718	0.349411	0.978912	1.08585	0.0406047	n.s.	component of the RNA polymerase III complex; ortholog of S. cerevisiae RPC25 and H. sapiens RPC8; there is a second copy of this gene, rpc25-2
DDB_G0288933	cda	0.6731	0.709619	0.784936	0.353599	1.29736	0.00686686	1.29438	catalyzes the reactions cytidine + H2O <=> uridine + NH3 and H2O + deoxycytidine <=> NH3 + deoxyuridine
DDB_G0272170	gnt8	0.180056	0.999718	-1.1294	0.103586	-1.40425	0.00837806	n.s.	distant relative of CAZy family GT24; catalyzes N-linked glycosylation
DDB_G0272218	DDB_G0272218	-0.368188	0.999718	-0.28686	0.999641	3.34425	4.6448e-05	n.s.	none
DDB_G0287587	smlA	-0.838481	0.283124	-0.376135	0.972207	-1.20639	0.029784	n.s.	cytosolic protein present in vegetative and developing cells
DDB_G0273221	DDB_G0273221	-0.568246	0.999718	0.170765	0.999641	4.47692	4.27223e-14	n.s.	conserved protein of unknown function; contains a predicted signal peptide; there is a second copy of this gene, DDB_G0273701
DDB_G0282061	DDB_G0282061	-0.0918784	0.999718	-0.501274	0.992882	5.37132	4.91478e-17	n.i.	none
DDB_G0281665	DDB_G0281665	0.625707	0.999718	2.39198	NA	4.08493	0.0449928	n.i.	none
DDB_G0290835	DDB_G0290835	-0.447371	0.999718	0.989277	0.530763	1.65498	0.0235396	n.s.	none
DDB_G0284831	4cl1	0.496875	0.999718	0.332703	0.999641	1.54179	0.00227579	n.i.	catalyzes the reaction ATP + 4-coumarate + CoA = AMP + diphosphate + 4-coumaroyl-CoA
DDB_G0283115	cnrB	-0.57197	0.883964	-0.739376	0.459074	-1.25864	0.0141469	n.s.	identified as a suppressor of smlA null mutant cnr2; contains six predicted transmembrane domains
DDB_G0275319	DDB_G0275319	2.5056	NA	2.53598	0.579999	4.29336	0.0251801	n.s.	none
DDB_G0275311	DDB_G0275311	-0.0033041	0.999718	-0.517477	0.721917	-1.27841	0.00331918	n.s.	catalyzes the condensation of acetyl-CoA and oxaloacetate to citrate
DDB_G0278243	rliB	0.8955	0.165508	-0.353072	0.999641	-4.40587	9.65293e-16	n.s.	repressed after Legionella pneumophila infection; contains a signal peptide; similar to comF
DDB_G0274303	DDB_G0274303	-0.220522	0.999718	0.754897	0.44384	2.0083	8.98909e-06	n.s.	none
DDB_G0285911	DDB_G0285911	-0.192925	0.999718	0.582936	0.95731	2.48016	0.000492618	n.s.	none
DDB_G0282575	DDB_G0282575	-0.177948	0.999718	-0.353817	0.999641	-1.41978	0.0278363	n.s.	none
DDB_G0288921	hspI	-0.852448	0.327152	-1.59093	0.0970536	-4.18728	9.23736e-08	n.i.	none
DDB_G0276661	DDB_G0276661	0.988775	0.316622	0.57477	0.67188	2.14265	2.13204e-07	n.s.	none
DDB_G0291281	DDB_G0291281	0.176339	0.999718	-0.809244	0.467794	-1.83944	0.000523722	n.i.	none
DDB_G0288137	DDB_G0288137	-0.123177	0.999718	-0.908555	0.0863556	-0.92523	0.0324341	n.s.	none
DDB_G0275121	alyC	-0.0121836	0.999718	1.2826	0.16108	-1.49625	0.028926	-1.78092	member of a new lysozyme class
DDB_G0272795	3B-1	-0.456455	0.999718	0.56756	0.757259	1.3698	0.00684437	n.s.	expressed in prespore cells; there is a second copy of this gene, 3B-2
DDB_G0272799	icmA-1	1.14473	0.0508535	0.753699	0.254771	1.1907	0.00416509	n.s.	prenylcysteine methyltransferase, carries out carboyxl methylation of cleaved eukaryotic proteins that terminate in a CaaX motif such as NE81 (lmnB); there is a second copy of this gene, icmA-2
DDB_G0283987	purC/E	-0.499992	0.998886	-1.26728	0.0501162	-1.92101	9.45057e-05	-2.23954	bifunctional enzyme composed of SAICAR synthase and AIR carboxylase, that catalyze steps in de novo DNA synthesis
DDB_G0285215	DDB_G0285215	0.796914	0.316622	-0.68212	0.903053	-2.0628	0.0168198	n.s.	domain similarity to domains in bacterial hypothetical proteins
DDB_G0290803	DDB_G0290803	0.591273	0.999718	-0.454558	0.999641	2.11412	0.00767924	n.i.	none
DDB_G0283985	DDB_G0283985	-1.6693	NA	0.368444	0.999641	2.50019	0.0159721	n.s.	none
DDB_G0288481	gchA	-0.335642	0.999718	-0.369033	0.955063	-2.40912	1.45245e-08	-2.1597	catalyzes the reaction GTP + 2 H2O = formate + 2-amino-4-hydroxy-6-(erythro-1,2,3-trihydroxypropyl)-dihydropteridine triphosphate, the first step in the biosynthesis of tetrahydropteridines, which have been shown to regulate G-protein coupled signalling; the gchA gene is expressed and the enzyme is active during the onset of Dictyostelium development
DDB_G0292768	dcd1B	-0.412832	0.999718	1.07604	0.0667832	1.13006	0.0187616	-1.28767	wealky similar to acid ceramidase, which catalyzes the reaction N-acylsphingoside + H2O = a carboxylate + sphingosine
DDB_G0284613	D7	-0.275121	0.999718	1.22634	0.127561	2.02969	0.000247146	n.s.	none
DDB_G0291071	DDB_G0291071	0.621921	0.72022	-1.38851	0.140268	-3.24556	1.22774e-06	n.s.	none
DDB_G0267846	expl1	-0.271277	0.999718	1.24345	0.128539	1.39263	0.0263881	-2.20205	similar to plant expansins, which modify the cell wall to allow expansion during cell growth; contains a predicted signal peptide
DDB_G0269388	corB	-0.132547	0.999718	-0.680756	0.358048	-1.27864	0.00169295	n.s.	ortholog of human coronin-7 (CORO7); long protein corresponding to two coronin equivalents; regulates F-actin depolymerization and is thus involved in substrate adhesion, phagocytosis and cell motility
DDB_G0272632	DDB_G0272632	-0.75379	0.370169	0.687851	0.72166	-3.00106	1.41463e-08	-2.58	catalyzes the reaction RX + glutathione <=> HX + R-S-glutathione; there is a second copy of this gene, DDB_G0274081
DDB_G0268386	DDB_G0268386	0.634464	0.81687	1.40916	0.0668121	1.50223	0.016257	n.s.	similar to D. purpureum protein; contains one SET domain and one tetratricopeptide repeat (TPR) region
DDB_G0283979	DDB_G0283979	1.45413	0.999718	3.15127	0.409721	5.92016	0.0018369	n.s.	none
DDB_G0283973	DDB_G0283973	-0.09476	0.999718	-0.58816	0.680266	-1.49113	0.00165105	n.s.	none
DDB_G0285683	eif3I	0.0694432	0.999718	-0.0495222	0.999641	0.923796	0.0249697	n.s.	EIF3I ortholog, the eukaryotic initiation factor beta subunit; In human, binds to the 40S ribosome and promotes the binding of methionyl-tRNAi and mRNA, is composed of at least 12 different subunits
DDB_G0285685	DDB_G0285685	-0.566285	NA	1.27872	0.9011	3.50443	0.0138898	n.i.	none
DDB_G0283975	DDB_G0283975	0.361543	0.999718	-0.574832	0.835093	-2.19065	7.01922e-05	n.s.	none
DDB_G0271970	DDB_G0271970	0.20003	0.999718	-1.12837	0.318059	-2.29879	0.000344201	n.s.	none
DDB_G0276259	DDB_G0276259	-0.362326	0.999718	0.538298	0.776379	1.05307	0.0422641	-1.30809	contains 5 predicted transmembrane domains and an additional putative signal sequence; similar to D. purpureum protein
DDB_G0285025	alrE	-0.804143	0.409467	0.000553127	0.999641	-1.52228	0.000290907	n.s.	member of aldo-keto reductase family, which reduces C=O to C-OH in aldehydes and ketones
DDB_G0275693	tpp1C	-0.0731645	0.999718	-0.736197	0.345254	-1.04451	0.0247292	n.s.	belongs to the family of tripeptidyl peptidases in Dictyostelium; contains a predicted signal peptide, and a peptidase S8/S53 domain
DDB_G0275691	DDB_G0275691	2.54106	NA	5.17207	NA	5.71016	0.0234749	n.i.	none
DDB_G0287219	DDB_G0287219	0.0778442	0.999718	1.28258	0.0807119	1.99742	0.000170267	n.i.	conserved Dictyostelium protein similar to bacterial proteins; contains a predicted signal peptide
DDB_G0277129	DDB_G0277129	-0.345415	0.999718	-0.079981	0.999641	3.10047	0.0175878	n.s.	none
DDB_G0269658	DDB_G0269658	-0.256963	0.999718	-0.400097	0.978912	-1.25017	0.0449837	n.s.	none
DDB_G0290449	DDB_G0290449	-0.443498	0.999718	0.661339	0.665822	1.17076	0.0375199	1.39156	none
DDB_G0278345	acly	0.00206496	0.999718	-0.649259	0.572259	-1.0682	0.0359852	-3.9	catalyzes the reaction ADP + phosphate + acetyl-CoA + oxaloacetate <=> ATP + citrate + CoA
DDB_G0289947	DDB_G0289947	-0.464539	0.997538	0.305464	0.99607	-1.38745	0.00332486	n.i.	conserved Dictyostelium protein; contains a putative N-terminal signal sequence, a C-terminal anchoring transmembrane domain and one EGF-like domain
DDB_G0283547	rsmA	-0.285749	0.999718	0.425141	0.999641	2.59799	2.13223e-05	n.i.	none
DDB_G0270964	DDB_G0270964_ps	1.59893	0.0211435	3.41648	1.81199e-09	3.39956	4.55612e-10	n.s.	putative pseudogene; highly similar to DDB_G0270480
DDB_G0290805	DDB_G0290805	0.394189	0.999718	0.606051	0.795096	1.40969	0.0146535	n.s.	none
DDB_G0292744	fncL	0.437113	0.999718	0.7442	0.791833	1.95333	0.00364955	n.i.	ortholog of Fanconi anaemia complementation group L protein, involved DNA cross-link repair; null mutant is sensitive to DNA damaging agents mammalian ortholog is part of the Fanconi anaemia nuclear complex that includes FANC A, B, C, E, F, G, L and M; the FA complex interacts with ube2t, a E2 ubiquitin-conjugating enzyme, to monoubiquitinate FANCD2 and FANCI. Ubiquinated FANCD2 and FANCI form a …
DDB_G0291099	DDB_G0291099	-0.0284496	0.999718	0.374544	0.98188	1.27941	0.0215895	n.s.	none
DDB_G0267370	DDB_G0267370_TE	0.0892067	0.999718	-1.41961	0.463148	-2.87374	0.00683197	n.i.	ORF2 (contains 2 introns) encoding a protein of unknown function of the putative DNA transposon DDT-A; refer to AF298201 for full-length consensus element
DDB_G0280315	DDB_G0280315	1.18839	0.0545207	-0.174219	0.999641	1.81257	0.0118777	n.i.	none
DDB_G0289497	DDB_G0289497	-0.483632	0.999718	-0.0481693	0.999641	3.17797	7.57203e-16	n.s.	none
DDB_G0290217	glb1	-0.760027	0.455472	0.308806	0.983347	1.03127	0.029392	n.s.	belongs to glycoside hydrolase family 35; hydrolyzes terminal non-reducing beta-D-galactose residues in beta-D-galactoside; has a signal peptide
DDB_G0274471	tpiA	0.0399713	0.999718	-0.512558	0.721917	-0.968753	0.0363405	n.s.	catalyzes the reaction D-glyceraldehyde 3-phosphate <=> glycerone phosphate; defects in human TPI1 are the cause of triosephosphate isomerase deficiency, severe clinical disorder of glycolysis
DDB_G0274473	DDB_G0274473	-0.816392	0.999718	0.65298	0.89932	2.30967	0.000733032	n.s.	none
DDB_G0274479	DDB_G0274479	0.661428	0.999718	0.688732	0.895965	2.95538	2.21826e-05	n.s.	none
DDB_G0278757	DDB_G0278757	0.909713	0.147354	0.802052	0.74466	2.09827	0.00220205	n.s.	none
DDB_G0278753	cyb5C	-0.300845	0.999718	0.466432	0.999641	2.27306	0.0320036	n.i.	cytochrome b5 proteins are membrane bound hemoproteins that function as an electron carrier for several membrane bound oxygenases, however, this protein seems truncated at the C-terminus and does not contain any transmembrane domain
DDB_G0283151	gpaF	0.618087	0.999718	0.316335	0.999641	1.79605	0.00853426	n.s.	subunit of the heterotrimeric G protein that has GTPase activity
DDB_G0270108	DDB_G0270108_ps	-0.897022	0.999718	0.711129	0.999641	2.9877	0.0121691	n.s.	putative pseudogene, almost identical to parts of the putative NADH dehydrogenase DDB_G0270104
DDB_G0269906	gtf2h5	0.326344	0.999718	0.592182	0.955259	2.1037	0.00422875	n.i.	general transcription factor required for the initiation of transcription by RNA polymerase II and in nucleotide excision repair
DDB_G0291652	shmt2	-0.0236994	0.999718	-0.643465	0.619125	-1.11661	0.0330734	n.s.	mitochondrial serine hydroxymethyltransferase; catalyzes the reaction L-serine + tetrahydrofolate <=> L-glycine + 5,10-methylene-tetrahydrofolate + H2O
DDB_G0291654	DDB_G0291654	-0.0612669	0.999718	0.0817811	0.999641	1.10182	0.0248169	n.i.	none
DDB_G0284881	DDB_G0284881	0.292668	0.999718	0.125949	0.999641	1.71191	0.0159721	1.10865	none
DDB_G0267562	stcA	-0.0305568	0.999718	0.427681	0.999641	1.67009	0.0209156	n.s.	none
DDB_G0277573	DDB_G0277573	-0.453762	0.999718	-1.12737	0.118971	-1.19605	0.0349622	1.12938	none
DDB_G0289679	DDB_G0289679	0.131579	0.999718	-0.217719	0.999641	-0.877668	0.0473225	n.s.	none
DDB_G0284661	DDB_G0284661	0.471459	0.999718	0.78405	0.368092	1.95457	8.32707e-06	n.s.	putative protein serine/threonine kinase CAMK group; kinase domain similar to mammalian CAM kinase I
DDB_G0291133	DDB_G0291133	0.188619	0.999718	0.761422	0.865031	2.08503	0.00934577	n.s.	putative protein tyrosine kinase; similar to S. pombe wee1, inhibitor of mitosis through phosphorylation of cdc2
DDB_G0289779	fmoA	-0.844467	0.999718	-0.47557	0.999641	2.08136	0.0145075	n.i.	belongs to the fmo family; similar to flavin-containing monooxygenases from a variety of eukaryotes; involved in the metabolism of xenobiotic compounds
DDB_G0290465	DDB_G0290465	-0.399308	0.999718	-1.19903	0.120308	-1.26392	0.0367805	n.i.	conserved hypothetical 695 aa Dictyostelium protein; centrosomal component
DDB_G0269226	cas1	-0.655711	0.664914	-0.500118	0.746743	-1.40774	0.000918321	n.s.	none
DDB_G0277745	DDB_G0277745	-0.493368	0.999718	-1.2346	0.0667832	-1.44008	0.00730313	n.s.	similar to bacterial phosphatase YidA
DDB_G0290075	DDB_G0290075	0.359405	0.999718	0.945201	0.38592	1.84503	0.00127299	n.s.	protein phosphatase 2C is a serine/threonine specific protein phosphatase with broad substrate specificity and dependent on divalent cations (mainly manganese and magnesium) for its activity
DDB_G0272999	pkd2	0.13691	0.999718	-0.0772297	0.999641	1.99472	0.0342526	n.s.	putative Ca2+ channel; similar to metazoan polycystin-2 (PKD2); defects in the human PKD2 causes polycystic kidney disease autosomal dominant type 2 (ADPKD2) characterized by progressive formation and enlargement of cysts in both kidneys; contains 6 putative transmembrane domains
DDB_G0292560	racJ	0.597836	0.999718	0.521142	0.999641	1.88174	0.0320626	n.s.	none
DDB_G0290079	pgtB	-0.791658	0.999718	0.493809	0.999641	2.55298	0.005951	n.s.	CAZy family GT2/4; disruption of this gene results in abolished spore coat lectin-binding and renders spores hypersensitive to plasmolysis
DDB_G0275525	hspK	-0.0225436	0.999718	-0.958275	0.105119	-1.04184	0.0256537	n.s.	none
DDB_G0291301	DDB_G0291301	-0.149336	0.999718	0.0367869	0.999641	1.33389	0.0103198	-2.28143	at the N-terminus similar to peroxisomal sarcosine oxidases (PSO), at the C-terminus similar to L-amino-acid oxidases (LAO)
DDB_G0284169	DDB_G0284169	0.895825	0.285657	0.710683	0.646693	1.28038	0.0305096	n.s.	contains 3 predicted transmembrane domains and an additional putative signal sequence; part of a larger gene family in D. discoideum, also present in other dictyostelids
DDB_G0289163	DDB_G0289163	-0.630542	0.862422	2.35539	0.625271	3.80835	0.0447707	n.s.	none
DDB_G0267354	DDB_G0267354_TE	0.0726843	0.999718	-1.40792	0.0529065	-3.07407	1.39806e-08	n.i.	ORF2 (contains 2 introns) encoding a protein of unknown function of the putative DNA transposon DDT-A; refer to AF298201 for full-length consensus element
DDB_G0279411	ctsD	-0.122865	0.999718	0.0297944	0.999641	-1.26886	0.00473362	n.s.	ortholog of human CTSD (CLN10), mutations in which have been linked to neuronal ceroid lipofuscinosis
DDB_G0288693	DDB_G0288693	0.16461	0.999718	0.343329	0.999641	1.72382	0.032218	n.s.	none
DDB_G0288691	hook	-0.245265	0.999718	-0.526046	0.646034	-1.00436	0.0202971	n.s.	similar to C. elegans ZYG-12 and mammalian HOOK proteins, which mediates the attachment between the centrosome and the nucleus
DDB_G0288699	tmem120	-0.0506221	0.999718	0.0380689	0.999641	0.937267	0.0444995	n.s.	conserved transmembrane protein; contains 4 putative transmembrane domains
DDB_G0280373	DDB_G0280373	-0.196839	0.999718	-1.76938	0.061171	-2.2602	0.00270671	n.i.	conserved in fungi and plants
DDB_G0279433	metap1	-0.630551	0.61927	-0.984725	0.0666027	-1.13475	0.00809758	n.s.	catalyzes the release of N-terminal amino acids, preferentially methionine, from peptides and arylamides
DDB_G0288347	nola3	0.2749	0.999718	-1.18829	0.0509278	-1.22746	0.0160294	n.i.	component of the H/ACA small nucleolar ribonucleoprotein (H/ACA snoRNP) complex required for pre-mRNA processing and pseudouridylation
DDB_G0283809	dcp2_ps	-0.571232	0.999718	1.13707	0.653667	3.18835	8.04088e-05	n.i.	putative pseudogene; similar to dcp2
DDB_G0280997	DDB_G0280997	-0.580933	0.999718	-0.264526	0.999641	-1.53036	0.0367805	n.s.	none
DDB_G0269964	DDB_G0269964	-0.5414	0.999718	0.602215	0.547517	1.00724	0.0279872	n.s.	none
DDB_G0267990	ypel	0.348397	0.999718	0.856773	0.628678	1.89049	0.00353363	n.s.	single D. discoideum ortholog of the highly conserved yippee protein family
DDB_G0279061	rpl31	0.13482	0.999718	-0.610921	0.601285	-1.23251	0.00837806	n.s.	protein component of the large (60S) ribosomal subunit
DDB_G0282261	ech1	0.249044	0.999718	0.801947	0.318059	1.1561	0.017865	n.s.	very conserved among prokaryotes and eukaryotes; isomerizes 3-trans,5-cis-dienoyl-CoA to 2-trans,4-trans-dienoyl-CoA
DDB_G0279459	DDB_G0279459	0.33361	0.999718	-0.123999	0.999641	-1.08735	0.0314231	n.s.	<b>Community Annotation</b> DDB G0279459 contains a forkhead-associated domain which is similar to the corresponding domain in the KI-67 antigen, a very widely used clinical proliferation marker, and is the only hit when the KI-67 sequence is blasted against Dicty proteins. Direct comparison of the Dd sequence with KI-67 by Blast2Sequences identifies two regions of homology and gives an expected …
DDB_G0272076	eif3L	-0.162969	0.999718	-0.472785	0.79867	-1.00384	0.0335326	1.12957	EIF3L ortholog, has been shown in human to bind EIF3E
DDB_G0277555	DDB_G0277555	-0.967742	0.93551	0.825356	0.999641	2.88775	0.036831	n.s.	none
DDB_G0281813	DDB_G0281813	0.386009	0.999718	0.898249	0.560518	2.02888	0.00109642	n.i.	none
DDB_G0274925	DDB_G0274925_ps	1.13308	0.884662	0.966176	0.875533	2.15135	0.0480401	n.s.	putative pseudogene; fragment, similar to the genes DDB_G0293720, DDB_G0293722
DDB_G0277169	DDB_G0277169	1.59691	NA	0.234412	0.999641	5.80955	1.45245e-08	n.s.	none
DDB_G0272440	DDB_G0272440	-0.155076	0.999718	-0.113929	0.999641	-0.893964	0.0384692	n.s.	very similar to the H. sapiens tumor protein p53-inducible protein 3 (TP53I3); belongs to the broader superfamily of zinc-dependent alcohol dehydrogenases
DDB_G0269954	DDB_G0269954	0.552668	NA	0.217801	0.999641	5.33892	3.67292e-07	n.s.	none
DDB_G0287335	DDB_G0287335	-0.0215381	0.999718	-0.671603	0.328941	-1.2453	0.0013817	n.s.	has similarity to human cold inducible RNA binding protein (CIRBP), however, it is considreably shorter
DDB_G0287333	eif3J	-0.193151	0.999718	-0.729229	0.380781	-1.09645	0.0214414	n.s.	EIF3J ortholog, the eukaryotic initiation factor alpha subunit; In human, binds to the 40S ribosome and promotes the binding of methionyl-tRNAi and mRNA; is composed of at least 12 different subunits
DDB_G0287621	DDB_G0287621	0.539659	0.960954	0.0314138	0.999641	-1.09909	0.0200775	n.s.	none
DDB_G0278127	DDB_G0278127	-0.492807	0.999718	-0.505158	0.958234	2.52186	7.35399e-06	n.i.	none
DDB_G0288113	DDB_G0288113_ps	0.45681	0.999718	1.95059	0.254274	2.31714	0.0436903	n.i.	similar to a large family of D. discoideum genes
DDB_G0283095	DD3-3	-0.322133	0.999718	0.967842	0.371827	1.33049	0.0367805	-2.01811	similar to tunicate proteins; involved in O-glycosylation as identified by mRNA differential display
DDB_G0267692	DDB_G0267692	-0.651593	0.907249	0.537254	0.820933	1.20292	0.0290678	n.s.	has a predicted signal peptide and a C-terminal transmembrane domain
DDB_G0294633	DDB_G0294633	0.324099	0.999718	0.880851	0.486771	1.82469	0.00196447	n.i.	contains two ankyrin repeats, which are among the most common protein-protein interaction motifs
DDB_G0267696	DDB_G0267696	0.14246	NA	3.45696	NA	6.48316	0.00540927	n.s.	none
DDB_G0290403	DDB_G0290403	0.0838279	0.999718	-0.694797	0.466963	-1.0119	0.0447707	n.s.	none
DDB_G0269208	abcG19	-0.592641	0.999718	1.84495	0.727991	4.63739	0.00168743	n.i.	full transporter, consisting of two ABC domains and two transmembrane domains
DDB_G0290401	DDB_G0290401	-0.18292	0.999718	-0.230901	0.999641	-1.1838	0.00568457	-1.66	phosphorylates (R)-pantothenate to (R)-4'-phosphopantothenate
DDB_G0275097	DDB_G0275097	0.022023	0.999718	0.187702	0.999641	1.41018	0.00331918	n.s.	none
DDB_G0279437	DDB_G0279437	-0.302989	0.999718	-0.751475	0.389729	-1.44473	0.00188998	n.s.	contains an N-terminal DOMON domain as it occurs in dopamine beta-monooxygenases; the Dictyostelium protein is followed by a cytochrome b561 domain, which contains 5 putative transmembrane regions; in addition, the protein contains a putative signal peptide
DDB_G0277493	cct6	-0.10398	0.999718	-0.46277	0.729234	-1.26995	0.000897333	n.s.	subunit of the chaperonin CCT ring complex involved in the folding of actin and tubulin
DDB_G0270924	DDB_G0270924	0.386374	0.999718	-1.04265	0.537494	-2.20987	0.00525751	n.i.	none
DDB_G0270922	DDB_G0270922	0.300562	0.999718	0.0996808	0.999641	-1.02229	0.0156952	n.i.	none
DDB_G0282673	DDB_G0282673	-0.685938	0.831462	0.446707	0.957423	-2.30661	4.77638e-05	n.s.	none
DDB_G0284463	maea	0.525981	0.987187	0.15484	0.999641	1.092	0.0390276	n.s.	ortholog of the mammalian MAEA protein that mediates the attachment of erythroblasts to macrophages
DDB_G0283191	DDB_G0283191	-0.653709	0.999718	1.43118	NA	5.02094	0.0318303	n.i.	none
DDB_G0288777	mppB	0.11454	0.999718	-0.434345	0.888068	-1.26884	0.00902548	n.s.	removes the transit peptide from the precursor form of proteins imported from the cytoplasm across the mitochondrial inner membrane; consists of an alpha (mppA) and a beta subunit
DDB_G0290293	colA_ps2	2.1303	0.656857	1.26595	0.942595	5.33006	0.00014025	n.i.	putative pseudogene; small fragment similar to the large colossin A gene colA
DDB_G0282971	DDB_G0282971	0.702769	0.628624	0.823554	0.311255	1.217	0.01349	n.s.	none
DDB_G0282973	stpA	-0.874489	0.976584	1.31331	0.196447	2.27675	0.000413905	n.s.	none
DDB_G0290297	xrcc2	0.374069	0.999718	1.50299	0.321975	2.38276	0.00684131	n.i.	putative ortholog of XRCC2, which is involved in double-strand break repair; interacts with RAD51
DDB_G0283111	cepD	0.271066	0.999718	1.40607	0.134388	2.02103	0.00229638	n.i.	localizes to the centrosomal core structure
DDB_G0270726	uduC	-0.442897	0.999718	0.0915644	0.999641	4.07782	1.15549e-09	n.s.	underexpressed in gskA-and zakA-null mutants; upregulated in the uninfected dupAmutant
DDB_G0292882	DDB_G0292882	0.108688	0.999718	-0.464261	0.724062	-0.875545	0.037458	n.s.	none
DDB_G0268360	DDB_G0268360	0.163802	0.999718	-0.444593	0.762622	-0.901122	0.0324948	n.i.	conserved in D. purpureum
DDB_G0291694	DDB_G0291694	1.18769	0.156085	0.0314149	0.999641	1.62716	0.0198631	n.i.	none
DDB_G0268092	DDB_G0268092	-0.0840261	0.999718	0.463109	0.999641	2.26716	0.00473306	n.i.	similar to human Zinc finger SWIM domain-containing protein 7, a regulator of homologous recombination in eukaryotic cells
DDB_G0268090	DDB_G0268090	0.106174	0.999718	0.829978	0.263265	2.39691	3.35155e-09	n.s.	underexpressed in gskA-and zakA-null mutants
DDB_G0293204	DDB_G0293204	-0.556283	0.919589	-0.375993	0.96588	-1.18081	0.0318314	n.s.	one of three paralogs in Dictyostelium (other genes: DDB_G0283989) that are putative hydrolases
DDB_G0279045	DDB_G0279045	-0.0425841	0.999718	-0.0326818	0.999641	-1.29548	0.00648967	n.s.	none
DDB_G0268890	aplJ	-0.476943	0.999718	1.11172	0.334267	1.93429	0.00299396	n.s.	none
DDB_G0285591	cmbl	-0.357412	0.999718	-0.282876	0.993415	-0.948792	0.0417449	n.s.	none
DDB_G0285597	rps28	0.264953	0.999718	-0.390384	0.910685	-1.12559	0.0158918	n.s.	protein component of the small (40S) ribosomal subunit; ribosomal protein S28 homolog
DDB_G0285595	DDB_G0285595	-0.255927	0.999718	-0.545071	0.960253	-1.58685	0.0447707	n.i.	weakly similar to E. coli yecM
DDB_G0292914	DDB_G0292914	0.907166	0.867844	0.574791	0.854581	2.40862	4.31617e-06	n.s.	none
DDB_G0285043	DDB_G0285043	2.21286	0.535071	2.79513	0.0655247	3.23262	0.0070853	n.i.	this is one of four almost identical genes on C4 (DDB_G0284931, DDB_G0284927, DDB_G0284925), and there is an additional very similar gene (DDB_G0271770) on C2
DDB_G0277531	DDB_G0277531	-0.537873	0.999718	0.932031	NA	4.90935	0.0366348	n.s.	conserved hypothetical Dictyostelium protein, contains one EGF-like, type 3 domain
DDB_G0277537	DDB_G0277537	-0.3942	0.999718	-0.427193	0.870476	-1.06616	0.0265251	n.s.	subunit of PI4K, responsible for the phosphorylation of phosphatidylinositol (PI) to PI4P (ATP + 1-phosphatidyl-1D-myo-inositol = ADP + 1-phosphatidyl-1D-myo-inositol 4-phosphate), the first committed step in the generation of phosphatidylinositol 4,5-bisphosphate (PIP2), a precursor of the second messenger inositol 1,4,5-trisphosphate (InsP3)
DDB_G0281293	ddiA	-0.349813	0.999718	-0.89637	0.217679	-1.22072	0.0132086	n.s.	none
DDB_G0289891	DDB_G0289891	0.530277	0.999718	0.373907	0.950488	1.27123	0.007668	n.s.	contains a putative signal sequence and one additional transmembrane domain
DDB_G0280967	kif3	-0.29661	0.999718	-0.173177	0.999641	-1.28284	0.00552302	n.s.	kinesin-1 family protein, involved in intracellular transport; belongs to the kinesin KHC subfamily
DDB_G0272466	DDB_G0272466	-0.880132	0.192074	-0.832114	0.749255	-3.39826	4.96664e-07	n.s.	none
DDB_G0291171	DDB_G0291171	-0.51394	0.999718	1.45869	0.196296	2.24783	0.00223143	n.s.	none
DDB_G0291179	metK	-0.0920637	0.999718	-0.769558	0.308573	-1.58862	0.000173311	n.s.	catalyzes the reaction ATP + L-methionine + H2O = phosphate + pyrophosphate + S-adenosyl-L-methionine
DDB_G0289733	DDB_G0289733	-0.442408	0.999718	0.951324	0.500192	2.25735	0.000250679	n.s.	similar to fungal and plant proteins; contains 4 putative transmembrane domains
DDB_G0289737	DDB_G0289737	0.283424	0.999718	1.27075	0.531889	2.41268	0.00687691	n.s.	none
DDB_G0271842	scsC	0.0846918	0.999718	-0.151112	0.999641	-1.02069	0.0182345	n.s.	catalyzes the reaction ATP + succinate + CoA = ADP + phosphate + succinyl-CoA
DDB_G0287609	DDB_G0287609	-0.444148	0.999718	1.10571	0.159849	1.23115	0.0351618	n.i.	highly similar to cinB (94% identity)
DDB_G0288069	DDB_G0288069	-0.480206	0.999718	0.0750394	0.999641	-1.45587	0.007668	n.i.	none
DDB_G0288063	pspD_ps	-0.270255	0.999718	1.61677	0.867067	3.86225	0.0238534	n.s.	putative pseudogene; simlar to prespore-specific protein pspD
DDB_G0288197	sibD	-0.212671	0.999718	1.77743	0.18288	3.0643	0.000295711	n.s.	integrin beta family protein; cytosolic domain binds talin
DDB_G0279673	DDB_G0279673	0.0885298	0.999718	0.542048	0.824719	1.50884	0.00426482	n.s.	none
DDB_G0278875	dduD	0.354739	0.999718	-1.06266	0.283485	-1.45273	0.0224588	n.s.	contains a signal peptide; member of a Dictyostelium protein family that includes DG1041; downregulated in the uninfected dupAmutant
DDB_G0274171	stcC	-0.143783	0.999718	-0.43716	0.999641	3.58096	1.5348e-05	n.s.	similar to Fraser syndrome protein, von Willebrand factor, and kielin; expressed in pstAO cells and in upper cup during culmination
DDB_G0268138	DDB_G0268138	-0.118279	0.999718	-0.799977	0.371827	-1.38628	0.00540927	n.s.	catalyzes the reaction RX + glutathione <=> HX + R-S-glutathione
DDB_G0291169	DDB_G0291169	-0.115881	0.999718	1.68713	0.190561	2.78588	0.000714303	n.s.	none
DDB_G0292586	DDB_G0292586	-0.111715	0.999718	-0.676977	0.481584	-1.66877	0.000163332	n.s.	none
DDB_G0276039	DDB_G0276039	0.00827792	0.999718	-0.793048	0.200745	-1.16491	0.00535615	n.s.	none
DDB_G0276035	DDB_G0276035	-0.542776	0.999718	2.65228	0.0693442	3.29474	0.00369871	-1.22124	conserved Dictyostelium protein; contains a putative N-terminal signal sequence, a C-terminal anchoring transmembrane domain and one EGF-like domain
DDB_G0276157	pkgA	0.646488	0.999718	1.05408	0.760831	2.93451	0.000801639	n.s.	serine/threonine protein kinase of the MAST (Microtubule Associated Serine/Threonine kinase) family
DDB_G0292104	tkrA	-0.681049	0.644739	-0.598195	0.633208	-1.09798	0.0251608	n.s.	catalyzes the reaction D-gluconate + NADP+ <=> 2-dehydro-D-gluconate + NADPH + H+
DDB_G0284093	rps16	0.0959155	0.999718	-0.473805	0.800233	-0.997334	0.0359315	n.s.	protein component of the small (40S) ribosomal subunit; ribosomal protein S16 homolog
DDB_G0274775	phdI	0.0244384	0.999718	-0.494813	0.701869	-1.00409	0.019203	n.s.	highly similar to Entamoeba histolytica PH domain proteins
DDB_G0288659	wdr18	-0.668501	0.800431	-1.00679	0.510793	-1.99665	0.00666276	n.i.	ortholog of WDR18
DDB_G0280401	cypD	0.0711608	0.999718	-0.675649	0.339165	-1.65488	8.60693e-06	n.s.	none
DDB_G0270704	DDB_G0270704_ps	0.169226	0.999718	1.89386	0.0512407	1.72704	0.0401519	n.s.	putative pseudogene; similar to Dictyostelium genes DDB_G0268352 and DDB_G0283993
DDB_G0270708	DDB_G0270708	-0.121476	0.999718	1.4763	0.063266	1.68326	0.00787038	n.s.	contains a signal peptide and a putative C-terminal transmembrane domain
DDB_G0274411	DDB_G0274411_ps	-0.0142937	0.999718	-0.690914	0.9341	-4.28772	2.1415e-06	n.s.	putative pseudogene
DDB_G0288381	DDB_G0288381	1.26223	0.204737	-1.74854	0.256259	-3.01736	0.00165105	n.s.	none
DDB_G0291900	DDB_G0291900	1.0339	0.256552	1.15246	0.0979092	2.70299	4.20598e-09	n.i.	none
DDB_G0282003	hat_ps	0.266486	0.999718	0.797658	0.886325	1.90092	0.0359315	n.i.	putative pseudogene; small fragment; similar to a family of D. discoideum genes, including hatC
DDB_G0293222	DDB_G0293222	0.119027	0.999718	0.807271	0.513922	2.77661	1.54563e-08	n.s.	none
DDB_G0269438	zpr1	0.389345	0.999718	0.504497	0.777992	1.8871	6.55491e-06	n.s.	ortholog of ZPR1, a eukaryotic zinc finger protein
DDB_G0279527	DDB_G0279527	-0.30564	0.999718	-1.13912	0.0948225	-1.53341	0.00290729	n.s.	none
DDB_G0288387	accA	-0.341554	0.999718	-0.50829	0.786901	-1.2799	0.00675003	-3.01	catalizes the reactions BCCP-biotin-CO2 + acetyl-CoA + ATP <=> malonyl-CoA + BCCP-biotin + phosphate + ADP <b>and</b> BCCP-biotin + CO2 + ATP <=> phosphate + ADP + BCCP-biotin-CO2
DDB_G0277515	DDB_G0277515	-0.458536	0.999718	-0.55185	0.760831	-1.75143	0.000242958	n.s.	none
DDB_G0289669	DDB_G0289669	0.0191907	0.999718	0.898328	0.579999	1.61273	0.0175878	n.i.	none
DDB_G0273343	DDB_G0273343	0.453911	0.999718	0.654901	0.674521	1.32286	0.0147447	n.s.	there is a second copy of this gene, DDB_G0273777
DDB_G0280093	gacGG	0.0512251	0.999718	-0.37649	0.913787	-0.986898	0.0346127	n.s.	none
DDB_G0285497	DDB_G0285497	0.0512749	0.999718	-0.732895	0.349403	-1.30468	0.00312918	n.i.	none
DDB_G0289719	DDB_G0289719	0.383841	0.999718	0.840012	0.650595	2.3289	0.000203742	n.i.	none
DDB_G0290997	mppA2	0.00180343	0.999718	-0.45457	0.804156	-0.99098	0.0294389	n.s.	the mitochondrial processing peptidase removes the transit peptide from the precursor form of proteins imported from the cytoplasm across the mitochondrial inner membrane; consists of an alpha and a beta (mppB) subunit; there is another alpha subunit, mppA1
DDB_G0278699	DDB_G0278699	-0.508923	0.999718	0.260422	0.999641	1.97708	0.00188998	n.s.	contains a weak tweety (tty) domain, which is of unknown function
DDB_G0279619	DDB_G0279619	0.557659	0.999718	1.568	0.527052	3.57746	0.000505267	n.i.	none
DDB_G0278529	DDB_G0278529	0.331653	0.999718	1.02911	0.289348	2.15554	6.8583e-05	n.s.	putative 22 kDa peroxisomal membrane protein that may be involved in pore forming activity and may contribute to the unspecific permeability of the organelle membrane
DDB_G0275581	DDB_G0275581	0.166077	0.999718	0.36073	0.942595	1.37483	0.00168226	n.s.	none
DDB_G0278955	DDB_G0278955	0.0291343	0.999718	1.16835	0.093527	2.7806	1.7554e-09	n.i.	none
DDB_G0278981	DDB_G0278981	0.461488	0.999718	0.410164	0.838328	1.42094	0.000292103	n.s.	ortholog of the E3 ubiquitin-protein ligase TRIAD1 (Two RING fingers And Double RING finger Linked), which is involved in the proteasomal degradation pathway; contains a ubiqutin associalte (UBA) domain and 2 RING-type zinc fingers sourrounding a cysteine-rich domain (C6HC)
DDB_G0276137	xrn1	0.244435	0.999718	0.835159	0.663492	1.90298	0.0044653	n.s.	ortholog of H. sapiens XRN1 and S. cerevisiae KEM1 (Kar-Enhancing Mutations 1) involved in RNA metabolism
DDB_G0276135	DDB_G0276135	0.131081	0.999718	0.49402	0.929755	1.34811	0.0288162	n.s.	none
DDB_G0277265	DDB_G0277265	-0.328855	0.999718	0.944937	0.811059	2.15191	0.0210143	n.s.	none
DDB_G0286853	DDB_G0286853	-1.06509	0.0848557	0.463872	0.858053	2.14168	7.05039e-07	n.s.	none
DDB_G0284629	DDB_G0284629	-0.0338708	0.999718	-0.36251	0.913656	-1.1249	0.00863438	n.i.	conserved in Dictyostelids; predicted to have structural similarity to the NFT2-like superfamily (nuclear transport factor); there is a highly similar gene, DDB_G0284631, downstream
DDB_G0272696	DDB_G0272696	-0.634856	0.83428	-0.160144	0.999641	-0.974992	0.0427746	n.s.	none
DDB_G0279973	DDB_G0279973	0.747292	0.611583	-0.147654	0.999641	-1.22769	0.00769391	n.s.	highly conserved protein containing an alkyl hydroperoxide reductase/thiol specific antioxidant/mal allergen domain
DDB_G0278261	DDB_G0278261	0.139462	0.999718	-0.30009	0.999641	-1.23536	0.0158575	n.s.	similar to the H. sapiens proton myo-inositol cotransporter SLC2A13; contains 10 putative transmembrane domains
DDB_G0280287	DDB_G0280287	0.104439	0.999718	-0.584537	0.60173	-0.968544	0.0406694	n.i.	none
DDB_G0277863	pdiA	-0.0686086	0.999718	2.00605	0.199755	4.61823	1.09065e-06	-1.74	none
DDB_G0289015	DDB_G0289015	0.10261	0.999718	-0.0224914	0.999641	-2.25533	0.00146158	-2.34379	none
DDB_G0283481	DDB_G0283481	0.935888	0.435234	1.80269	0.0518794	1.8368	0.0183453	-1.63526	similar to Dictystelium cell surface glycoproteins gp130, and cfrA, B, C, and D (GP138A-D)
DDB_G0269986	DDB_G0269986	-0.354688	0.999718	-0.528265	0.916211	-1.58817	0.0167393	n.s.	none
DDB_G0283733	DDB_G0283733	1.13572	0.408917	0.499381	0.964249	2.59046	1.60067e-05	n.s.	none
DDB_G0285775	DDB_G0285775	0.377508	0.999718	0.703805	0.964249	2.06173	0.0348374	n.s.	conserved Dictyostelium protein; contains one putative transmembrane domain
DDB_G0275635	pik6	-0.0156497	0.999718	0.744557	0.527737	1.22203	0.0274371	n.s.	phosphatidylinositol phosphate kinase that binds diacylglycerol; essential for normal early developmental gene expression
DDB_G0293954	DDB_G0293954	0.127701	NA	1.27161	0.806513	3.76464	0.000614818	n.s.	none
DDB_G0293950	DDB_G0293950	-0.0476782	0.999718	-1.24962	0.214378	-1.53734	0.0300369	1.69534	none
DDB_G0284911	timm10	0.0962845	0.999718	-0.685964	0.408822	-1.29579	0.00301289	1.00142	conserved component of the mitochondrial intermembrane space, forms a complex with Timm9, which mediates insertion of hydrophobic proteins at the inner membrane.
DDB_G0284915	DDB_G0284915	-0.165107	0.999718	-0.400781	0.853035	-0.969161	0.0268741	n.s.	ortholog of the mammalian MMRP19 (monocyte macrophage 19) protein
DDB_G0283033	tpp1E	0.149807	0.999718	0.23452	0.999641	1.50425	0.028944	n.s.	belongs to the family of tripeptidyl peptidases in Dictyostelium; contains a predicted signal peptide, and a peptidase S8/S53 domain
DDB_G0270048	DDB_G0270048	0.576895	0.999718	0.856771	0.846019	2.7288	0.000775797	n.s.	none
DDB_G0269848	agpA	-0.126462	0.999718	0.276926	0.999641	1.25866	0.00981644	n.s.	belongs to the acyltransferase superfamily; contains 2 predicted transmembrane domains
DDB_G0269846	DDB_G0269846	-0.135569	NA	-0.0969551	0.999641	7.32658	0.000776362	n.s.	none
DDB_G0291738	rabG1	-0.119943	0.999718	-0.296078	0.999641	3.34798	0.00177567	n.i.	none
DDB_G0279497	DDB_G0279497	0.497495	0.999718	0.177078	0.999641	-1.15534	0.0322879	n.s.	none
DDB_G0282615	midA	-0.0756929	0.999718	-0.381729	0.902722	-0.938139	0.0447707	n.s.	conserved protein required for mitochondrial complex I assembly both in Dictyostelium and in human; interacts with the mitochondrial complex I protein ndufs2
DDB_G0267728	uduA3	0.182857	0.999718	-0.861723	0.616826	2.06518	0.000940399	n.i.	almost identical to uduA1, uduA2
DDB_G0286197	DDB_G0286197	-0.449994	0.999718	-0.561719	0.738902	1.3496	0.00540927	n.s.	contains an N-terminal signal sequence
DDB_G0285347	DDB_G0285347	0.143279	0.999718	0.674246	0.820727	1.60115	0.0186887	n.s.	none
DDB_G0277301	DDB_G0277301	0.40121	0.999718	0.920288	0.1964	1.13095	0.0240592	n.s.	none
DDB_G0275799	DDB_G0275799	0.334085	0.999718	0.863071	0.960253	3.14967	0.00337441	1.12362	none
DDB_G0281065	DDB_G0281065	-0.0547442	0.999718	0.0862342	0.999641	1.28548	0.0358736	n.s.	none
DDB_G0288613	erf1	-0.0785324	0.999718	-0.067702	0.999641	2.09294	4.77638e-05	n.s.	class I release factor of the translation termination machinery; in eukaryotes with the universal genetic code, predicted to recognizes all stop codons (UAA, UAG and UGA)
DDB_G0288617	shkB	0.325036	0.999718	0.341594	0.934715	1.07124	0.0117412	n.s.	member of the TKL (tyrosine kinase-like) group and the SHK (SH2-domain containing kinase) subfamily; contains a C-terminal SH2 (Src homology 2) domain
DDB_G0281551	guaA	-0.378476	0.999718	-0.74816	0.494715	-2.01093	2.73685e-05	-2.99591	catalyzes the reaction xanthosine-5-phosphate + H2O + L-glutamine + ATP <=> L-glutamate + GMP + pyrophosphate + AMP in GMP biosynthesis
DDB_G0280445	DDB_G0280445	-0.606054	0.800001	0.00451282	0.999641	1.55468	0.0329001	n.s.	GFA enzymes catalyze the condensation of formaldehyde and glutathione to S-hydroxymethylglutathione; all known members of this family contain 5 strongly conserved cysteine residues
DDB_G0284585	fslL	-0.237739	NA	2.4133	NA	6.47057	0.00901785	n.s.	similar to the G-protein coupled receptors; contains 7 putative transmembrane domains and a potential signal sequence
DDB_G0280977	abcC10	0.771093	0.79843	1.10262	0.151276	1.25543	0.0286777	n.s.	full transporter, consisting of two ABC domains and two transmembrane domains
DDB_G0289693	DDB_G0289693	-0.158331	0.999718	0.451196	0.983899	2.59	9.06167e-06	n.i.	expressed in prespore cells
DDB_G0280919	DDB_G0280919	0.656447	0.828321	-0.819865	0.931885	5.18811	7.76294e-14	-1.27303	similar to D. purpureum protein
DDB_G0279145	DDB_G0279145	0.404667	0.999718	0.802586	0.37205	1.20322	0.0199616	n.s.	none
DDB_G0268640	DDB_G0268640	-0.124411	0.999718	2.32657	0.619125	4.09648	0.0235396	n.s.	serine-rich protein very similar to rtoA; contains a putative signal sequence
DDB_G0276683	DDB_G0276683	1.2232	0.0528488	1.05485	0.203968	2.64353	7.8986e-08	n.s.	none
DDB_G0269476	act31	0.0810785	NA	2.08929	0.415054	6.45277	5.82717e-09	n.s.	actin related protein of unknown function
DDB_G0279799	cprB	0.372437	0.999718	1.87713	0.376265	3.2028	0.00540927	-1.40077	none
DDB_G0268876	DDB_G0268876	0.0077358	0.999718	-0.266732	0.999641	-1.17055	0.0090191	n.s.	member of the TKL (tyrosine kinase-like) group of protein kinases; contains filamin repeat similar to ABP120
DDB_G0288579	DDB_G0288579	-0.0636323	0.999718	-0.998912	0.11846	-2.12342	7.50435e-07	n.s.	none
DDB_G0293592	DDB_G0293592	-0.281368	0.999718	3.00184	0.110227	4.90073	0.000154332	n.s.	none
DDB_G0282409	DDB_G0282409	-0.353018	0.999718	-0.320622	0.999641	-1.24933	0.0176385	n.s.	weakly similar to M. musculus bromodomain-containing protein BP75 (SwissProt O88665)
DDB_G0295757	DDB_G0295757	-1.36224	0.250378	-1.38661	0.506813	-2.29743	0.0307392	n.s.	none
DDB_G0280583	DDB_G0280583	0.959449	0.271129	1.31939	0.196296	1.59941	0.0258387	n.s.	none
DDB_G0290957	cprA	-0.111825	0.999718	-0.384761	0.950517	1.26672	0.00923892	n.s.	none
DDB_G0281981	DDB_G0281981	0.480498	0.999718	-0.280982	0.999641	1.814	1.98541e-05	n.s.	none
DDB_G0281987	lyrm1	0.552261	0.999718	0.0700637	0.999641	1.24573	0.0425305	n.s.	belongs to a family of short proteins that includes ndufa6 from the NADH-ubiquinone oxidoreductase complex I; named LYR after a highly conserved tripeptide motif
DDB_G0280051	DDB_G0280051	-0.260533	0.999718	-0.658023	0.477308	0.989295	0.0350077	-1.72617	none
DDB_G0269282	DDB_G0269282	0.137563	0.999718	-0.0937184	0.999641	-0.933567	0.0345652	n.s.	none
DDB_G0278863	fray1	-0.0641942	0.999718	-0.168337	0.999641	-1.21685	0.0211884	n.s.	kinase domain similar to OSR1 (oxidative stress responsive 1) kinases and other STE20-like kinases
DDB_G0271774	uqcrh	0.171412	0.999718	-0.318408	0.955225	-0.962382	0.0272175	n.i.	similar to the hinge protein of the ubiquinol-cytochrome C reductase complex, involved in respiration
DDB_G0289205	DDB_G0289205	0.375646	0.999718	1.5212	0.633208	4.1473	7.20517e-05	n.s.	none
DDB_G0278563	DDB_G0278563	0.153792	0.999718	-0.934497	0.8827	-4.45469	3.18927e-06	n.s.	none
DDB_G0272975	DDB_G0272975	0.0996286	0.999718	2.29373	0.541582	3.49356	0.0442698	n.s.	none
DDB_G0294344	DDB_G0294344_RTE	na	na	1.14958	0.846811	3.11211	0.00720622	n.i.	ORF2 protein fragment of DIRS1 retrotransposon; refer to Genbank M11339 for full-length element
DDB_G0285323	atg9	0.535977	0.883964	0.514385	0.765722	1.40706	0.00171146	n.s.	Dictyostelium homolog of yeast atg9; involved in phagocytosis, growth, development, and the response to pathogen bacteria; contains 6 predicted transmembrane domains
DDB_G0290103	elp3	-0.0475197	0.999718	0.498283	0.659313	1.37718	0.000262019	n.s.	similar to ELP3, the histone acetyltransferase subunit of the subunit of the RNA polymerase II elongator complex
DDB_G0277327	DDB_G0277327	-0.220859	0.999718	-0.757884	0.320644	-1.16374	0.0108631	n.s.	none
DDB_G0277321	crtp2	-0.121206	0.999718	0.993362	0.419541	1.52555	0.0214136	n.s.	similar to Plasmodium falciparum CRT, which confers resistance to chloroquine; contains 10 predicted transmembrane domains
DDB_G0272308	rps29	0.312359	0.999718	-0.460566	0.820259	-1.248	0.00611592	n.i.	protein component of the small (40S) ribosomal subunit; ribosomal protein S29 homolog
DDB_G0272304	aspS2	-0.244004	0.999718	2.29721	NA	4.18197	0.037788	n.s.	catalyzes the reaction ATP + L-aspartate + tRNAAsp = AMP + diphosphate + L-aspartyl-tRNAAsp
DDB_G0286897	DDB_G0286897	-0.408688	0.999718	1.14355	0.126831	2.43105	7.50435e-07	n.s.	similar to comF
DDB_G0286891	DDB_G0286891	2.47407	0.292827	3.75025	0.090835	4.93141	0.00299049	n.s.	contains 8 transmembrane domains
DDB_G0275847	DDB_G0275847	0.446838	0.999718	0.862893	0.476093	1.56648	0.00734038	n.s.	belongs to the UPF0568 family; homolog of human C14orf166
DDB_G0275845	smg1	-0.13528	0.999718	-0.321672	0.999641	-1.17056	0.0361289	n.s.	atypical, PIKK family protein kinase; similar to the PI-3-kinase-related kinase SMG1, which functions in nonsense-mediated mRNA decay; belongs to the PIKK family of protein kinases
DDB_G0271506	pitrm1	-0.230841	0.999718	-0.612801	0.672846	-1.29757	0.0113225	n.s.	ortholog of H. sapiens PITRM1 and S. cerevisiae CYM1 involved in protein degradation
DDB_G0288953	DDB_G0288953	-0.264292	0.999718	-0.577374	0.72166	-1.1028	0.0349223	n.s.	none
DDB_G0271016	DDB_G0271016	-0.519673	0.967369	0.306518	0.978912	-1.49581	0.000446728	n.s.	none
DDB_G0277915	gefI	-0.738649	0.630004	0.540692	0.700625	0.977961	0.0413718	-1.32654	putative Ras guanine nucleotide exchange factor; promotes the exchange of GDP for GTP on Ras small GTPases thus converting them into the active form
DDB_G0284579	DDB_G0284579	-0.242128	0.999718	-0.751614	0.699373	-1.68905	0.00768534	n.s.	contains 12 putative transmembrane domains
DDB_G0283773	DDB_G0283773	0.245348	0.999718	0.808198	0.275786	1.76967	2.10691e-05	n.s.	putative GTPase, very conserved in protozoa and fungi
DDB_G0268810	DDB_G0268810	0.0301299	0.999718	-1.11433	0.125211	-1.33364	0.015481	n.s.	ortholog of bacterial Mg2+ transporter mgtA; contains eight transmembrane domains
DDB_G0270826	abcG22	0.292973	0.999718	0.431462	0.83332	1.57775	8.86386e-05	-2.72979	half transporter, consisting of one ABC domain and one transmembrane domain
DDB_G0275671	DDB_G0275671	0.679519	0.860222	0.308014	0.999641	2.18332	1.0993e-05	n.s.	putative serine esterase; similar to hypothetical proteins in plants and yeast
DDB_G0291466	DDB_G0291466	0.304557	0.999718	0.342656	0.999641	1.82847	0.0363405	n.i.	none
DDB_G0291464	DDB_G0291464	0.0298531	0.999718	-0.378085	0.921637	-1.00452	0.0363405	n.i.	none
DDB_G0291468	DDB_G0291468	0.635926	0.831462	0.647413	0.661316	1.74694	0.00031548	n.s.	none
DDB_G0293644	DDB_G0293644	0.623933	0.653605	0.400016	0.934715	-1.15532	0.0240756	n.s.	none
DDB_G0295779	DDB_G0295779	-0.247347	0.999718	-0.405002	0.828494	-1.20392	0.0024621	n.i.	none
DDB_G0276321	DDB_G0276321	-0.131096	0.999718	0.869704	0.454267	1.6818	0.00297398	n.s.	similar to mammalian SA hypertension-associated homolog and to acetoacetyl-CoA synthetases, which catalyze the first step of the mevalonate pathway of isoprenoid biosynthesis via isopentenyl diphosphate
DDB_G0280039	myoA	0.177249	0.999718	0.872856	0.419541	1.77448	0.00114827	n.s.	actin-based motor; unconventional myosin heavy chain
DDB_G0275075	DDB_G0275075	-0.171045	0.999718	-0.60523	0.538983	-1.02745	0.0248026	n.s.	ortholog of mammalian NARG1 and yeast NAT1, part of a complex that displays alpha (N-terminal) acetyltransferase activity
DDB_G0269800	DDB_G0269800	0.295246	0.999718	2.11516	0.000208526	2.29623	6.39926e-06	n.s.	putative ortholog of the conserved chromatin assembly factor 1 (CAF1) subunit B Note:Do not confuse this gene with cafA, calfumirin 1
DDB_G0282167	DDB_G0282167	0.290749	NA	0.511675	0.999641	2.08936	0.0156314	n.s.	none
DDB_G0286719	ponC4	-0.570219	0.999718	1.24835	0.0561562	-2.41006	6.94902e-07	n.i.	similar to ponticulin (ponA), a protein that anchors the actin cytoskeleton to the plasma membrane; almost identical to 3 downstream and 1 upstream gene
DDB_G0279185	cprF	0.701488	0.81687	0.0252862	0.999641	-2.46549	0.000447636	n.s.	enriched in prespore cells
DDB_G0276529	DDB_G0276529	0.288901	0.999718	-1.34996	0.121851	-1.69163	0.00971745	n.s.	none
DDB_G0267766	gfm2	-0.492721	0.999718	-0.949587	0.245086	-1.19783	0.0300369	n.s.	involved in the translocation of the nascent peptide chain from the ribosomal A-site to the P-site
DDB_G0267768	DDB_G0267768	-0.230482	0.999718	-0.909171	0.161856	-1.10111	0.0208115	1.08675	widely conserved protein, very similar to M. musculus Myg1 (melanocyte proliferating gene 1)
DDB_G0291422	DDB_G0291422	-0.356027	NA	2.75236	0.134533	5.88625	3.00224e-07	n.i.	none
DDB_G0267420	sodA	0.0436289	0.999718	-0.328251	0.942595	-1.15758	0.00459933	n.s.	superoxide dismutase of the SOD1 family; expressed at constant levels throughout the life cycle and upregulated upon oxidative stress; enriched in prespore cells
DDB_G0267424	amtC	-0.0032228	0.999718	0.495489	0.796405	1.26661	0.00662509	n.s.	similar to Arabidopsis AMT1, involved in transporting ammonia in the environment into the cell; contains 11 transmembrane domains
DDB_G0290697	DDB_G0290697	0.320194	0.999718	-1.02205	0.382005	-1.41767	0.041288	n.i.	none
DDB_G0292830	nhe3	-1.08574	0.783597	0.468096	0.96588	1.69498	0.00853426	1.58	none
DDB_G0277697	DDB_G0277697	-0.543143	0.948416	0.993382	0.132871	1.7687	7.81252e-05	n.s.	conserved protein; similar to DDB_G0278913
DDB_G0277349	DDB_G0277349	0.0245726	0.999718	-0.99741	0.0599822	-1.32007	0.00134922	n.s.	none
DDB_G0287101	noxB	-0.856733	NA	2.14475	0.741273	4.66527	0.00990878	n.s.	homolog of the mammalian flavocytochrome b large subunit gp91phox, essential for spore formation
DDB_G0284631	DDB_G0284631	-0.273263	0.999718	-0.658177	0.61863	-1.69533	0.000560567	n.i.	conserved in Dictyostelids; predicted to have structural similarity to the NFT2-like superfamily (nuclear transport factor); there is a highly similar gene, DDB_G0284629, upstream
DDB_G0272324	sbds	0.254181	0.999718	0.643921	0.538983	2.09616	4.2e-07	n.s.	orthlog of the human SBDS protein, which is mutated in a majority of patients with Shwachman-Bodian-Diamond syndrome; localizes to the pseudopodia in cAMP gradient
DDB_G0291253	dia2	0.644146	0.915874	0.197452	0.999641	3.48423	2.49435e-07	n.s.	lysine and leucine rich protein specifically expressed during the transition from growth to development; located in the ER in vegetative cells and in prespore vesicles during development
DDB_G0281617	DDB_G0281617	-0.254729	0.999718	1.62584	0.854581	5.6727	0.000145884	n.i.	conserved hypothetical 278 aa Dictyostelium protein
DDB_G0278213	DDB_G0278213	-0.48028	0.999718	1.69852	0.824719	3.46465	0.0451433	n.s.	none
DDB_G0271988	DDB_G0271988	1.03668	0.313606	1.25971	0.0937321	2.02481	0.000156333	n.s.	contains 7 putative transmembrane domains; similar to D. purpureum protein
DDB_G0273051	drnA-1	0.582979	0.800431	-0.195714	0.999641	-1.52257	0.00955276	n.s.	similar to the mammalian Dicer protein, an RNase III protein that converts long dsRNA (double-stranded RNA) into siRNA (small interfering RNA); there is a second copy of this gene, drnA-2
DDB_G0283977	DDB_G0283977	0.564454	0.894911	1.03178	0.122392	1.55939	0.000956656	n.s.	none
DDB_G0305372	DDB_G0305372	0.226824	0.999718	1.21804	0.57759	1.9464	0.0419757	n.i.	none
DDB_G0271624	DDB_G0271624	0.138412	0.999718	2.63372	0.176035	2.98475	0.0353426	n.s.	none
DDB_G0275227	DDB_G0275227	-0.00714347	0.999718	-0.0905533	0.999641	-1.14907	0.00590037	n.i.	similar to FKBP-type peptidyl-prolyl isomerase, which functions as a receptor for immunosuppressants in vertebrates
DDB_G0291364	DDB_G0291364	0.542072	0.950025	0.514254	0.649623	1.01489	0.0159678	-1.16085	none
DDB_G0270806	ldhd	-0.101049	0.999718	-0.127207	0.999641	-0.943186	0.0343642	n.s.	catalyzes the reaction R)-lactate + 2 ferricytochrome c = pyruvate + 2 ferrocytochrome c
DDB_G0274191	dhkC	-0.634337	0.999718	-0.277442	0.999641	2.14082	0.0224725	n.s.	none
DDB_G0291408	DDB_G0291408	-0.295058	0.999718	1.05656	0.0639514	2.34678	2.61468e-09	n.s.	conserved protein in Dictyostelium, fungi, and bacteria
DDB_G0276759	cbpA	-0.580169	0.999718	1.88214	0.0755734	1.81769	0.0403081	n.s.	contains four EF hands; regulates reorganization of the actin cytoskeleton during cell aggregation
DDB_G0281239	impa1	0.20337	0.999718	0.761817	0.260614	-1.11896	0.0103609	n.s.	catalyzes the reaction myo-inositol phosphate + H2O <=> myo-inositol + phosphate; human IMPA1 is a pharmacological target for Li+ in the treatment of manic depression
DDB_G0276345	naa20	0.153683	0.999718	-0.234375	0.999641	-1.11407	0.00949351	n.s.	ortholog of the conserved catalytic subunit of the NatB N-terminal acetyltransferase (NAA20), which in yeast catalyzes the transfer of an acetyl group to the N-terminal residue of a protein that contains a Met-Glu, Met-Asp, Met-Asn, or Met-Met N-terminus
DDB_G0290319	DDB_G0290319	0.525966	0.999718	1.06544	0.292217	1.60515	0.00916348	n.s.	none
DDB_G0290317	psiJ	0.186681	0.999718	0.144812	0.999641	2.75466	0.00677998	n.s.	contains a PA14 (anthrax protection antigen) domain and 6 Dictyostelium (CTDC) repeats
DDB_G0290315	rpl23	0.262301	0.999718	-0.339042	0.937481	-1.17649	0.00442336	n.s.	protein component of the large (60S) ribosomal subunit
DDB_G0290311	DDB_G0290311	-0.0697084	0.999718	-0.808155	0.170217	-1.00384	0.0183903	n.s.	none
DDB_G0281499	vinB	-0.177495	0.999718	-0.629942	0.519434	-0.988025	0.0380529	-1.0126	has weak similarity to vinculins involved in the attachment of the actin cytoskeleton to the plasma membrane through interactions with talin and alpha-actinin
DDB_G0288437	DDB_G0288437	0.273388	0.999718	0.654798	0.689115	1.45574	0.00675003	n.s.	none
DDB_G0276969	DDB_G0276969	-0.318516	0.999718	-0.27071	0.999641	2.06948	0.00753796	n.i.	highly similar to D2; contains a predicted signal peptide
DDB_G0276967	racF2	4.71786	NA	4.03072	0.0571469	4.76632	0.00461274	n.i.	enriched in gametes
DDB_G0284203	kynu	-0.0932365	0.999718	-0.444698	0.820259	-0.993134	0.0318303	n.s.	catalyzes the reaction L-kynurenine + H2O <=> anthranilate + L-alanine during nicotinic acid biosynthesis
DDB_G0272514	DDB_G0272514	0.500001	0.999718	0.722475	0.619125	1.4969	0.00736744	n.i.	none
DDB_G0275053	DDB_G0275053	-0.392222	0.999718	-0.607868	0.464176	-1.44177	0.000200273	n.s.	belongs to the NADP_Rossman superfamily; similar to human NMRAL1; A. nidulans nmrA is a transcriptional regulator involved in nitrogen metabolite repression
DDB_G0293060	DDB_G0293060	-2.24091	NA	0.848821	0.970263	5.05471	9.44281e-08	-1.06692	none
DDB_G0283357	DDB_G0283357	-0.423274	0.999718	-0.272406	0.999641	-1.33206	0.0108631	n.i.	none
DDB_G0293066	DDB_G0293066	-0.492912	0.982293	0.512994	0.96588	-1.50849	0.049218	n.s.	conserved in Dictyostelium; contains one putative transmembrane domain
DDB_G0271732	DDB_G0271732	0.441511	0.999718	0.753849	0.484746	2.07781	9.06167e-06	n.s.	highly similar to mammalian DNA-binding protein SMUBP-2 (IGHMBP2), involved in muscular atrophy and other diseases; putative ortholog of S. cerevisiae HCS1, a DNA helicase associated with alpha DNA polymerase
DDB_G0276507	DDB_G0276507	-0.0994078	0.999718	-0.33778	0.999641	2.3234	0.0191474	n.i.	none
DDB_G0276505	DDB_G0276505	0.125755	0.999718	-0.196833	0.999641	-1.59601	0.00112865	n.i.	none
DDB_G0269354	DDB_G0269354	0.930321	0.39117	1.22278	0.0800121	1.95473	9.63086e-05	n.s.	conserved hypothetical Dictyostelium protein, contains one EGF-like, type 3 domain
DDB_G0284197	proS	0.527586	0.84766	0.410089	0.979366	2.08345	0.000169201	n.s.	catalyzes the reaction ATP + L-proline + tRNAPro = AMP + diphosphate + L-prolyl-tRNAPro
DDB_G0275737	DDB_G0275737	0.679336	0.611839	0.884908	0.128863	1.01607	0.0220077	n.s.	none
DDB_G0287807	DDB_G0287807	-0.281588	0.999718	0.529832	0.978912	1.56539	0.048511	n.i.	contains a putative N-terminal signal sequence and one predicted C-terminal transmembrane domain
DDB_G0279689	eftud1	0.329146	0.999718	0.399864	0.934715	1.12627	0.0267479	n.s.	highly conserved protein that is similar to elongation factor Tu
DDB_G0291233	rabA	1.37373	0.197939	1.03527	0.35958	1.6447	0.00981385	n.i.	none
DDB_G0273079	DDB_G0273079	0.630993	0.999718	0.533996	0.913787	1.45401	0.0256863	n.s.	there is a second copy of this gene, DDB_G0273773
DDB_G0273077	DDB_G0273077	0.462043	0.999718	0.687576	0.820215	2.25487	0.00031811	n.s.	there is a second copy of this gene, DDB_G0273767
DDB_G0281613	DDB_G0281613	-0.761583	0.999718	2.35342	0.815454	6.29985	0.00279171	n.i.	conserved hypothetical 278 aa Dictyostelium protein; centrosomal component
DDB_G0289583	DDB_G0289583	0.325891	0.999718	0.777107	0.289933	1.95479	1.0523e-06	n.s.	ortholog of human SDCCAG1 (serologically defined colon cancer antigen 1), a conserved eukaryotic protein of unknown function
DDB_G0288187	ddi1	0.977877	0.124501	-0.352845	0.999641	1.64728	0.0332399	n.s.	conserved protein that in S. cerevisiae is a DNA damage-inducible v-SNARE binding protein
DDB_G0278375	DDB_G0278375	-0.01396	0.999718	-0.599759	0.586972	-1.01081	0.0341036	n.s.	none
DDB_G0286699	DDB_G0286699	-0.105133	0.999718	-0.949657	0.0797905	-1.12112	0.00854783	n.s.	none
DDB_G0279737	top2mt	-0.643889	0.800431	-0.928663	0.198047	-1.53673	0.00127275	n.s.	controls the topological state of DNA by transient double-strand breakage and subsequent rejoining of DNA strands; Top2mt has been shown to be localized to the mitochondria
DDB_G0286631	ponF	-0.188839	0.999718	0.264908	0.999641	3.08348	0.000363913	n.i.	structurally similar to ponticulins; contains a putative signal peptide
DDB_G0282461	grlC	-1.35643	0.135243	-0.256107	0.999641	-4.92919	0.00291885	-1.0688	metabotropic glutamate receptors are coupled to G-proteins and stimulate the inositol phosphate/Ca2+ intracellular signaling pathway; distinctive '7TM' signature
DDB_G0291676	DDB_G0291676	-1.11576	0.289116	-1.45171	0.24308	-1.76775	0.0374736	n.i.	similar to bacterial short-chain dehydrogenase/reductase family proteins
DDB_G0290085	DDB_G0290085	-0.466378	0.999718	-0.800308	0.328941	-1.14365	0.0213029	n.s.	none
DDB_G0281963	DDB_G0281963	0.575532	0.868767	0.840709	0.359324	1.26286	0.0173239	n.s.	none
DDB_G0280567	ctps	-0.285763	0.999718	-1.22028	0.153822	-1.76364	0.00332486	n.s.	catalyzes the reaction L-glutamine + H2O + UTP + ATP -> CTP + phosphate + ADP + L-glutamate in de novo biosynthesis of pyrimidine ribonucleotides
DDB_G0285203	DDB_G0285203	-1.02243	0.794284	1.21499	0.418739	1.69698	0.0421929	n.i.	none
DDB_G0285615	iliA	4.14106	0.124501	2.79794	0.465344	5.38892	0.00407923	1.18766	contains a putative N-terminal signal sequence; regulated by zakA, and induced by Legionella pneumophila infection
DDB_G0292994	pdhA	0.00349347	0.999718	-0.399896	0.836835	-1.10532	0.00657153	n.s.	catalyzes the reaction lipoamide + pyruvate <=> S-acetyldihydrolipoamide + CO2; E1 alpha component of pyruvate dehydrogenase complex, which contains multiple copies of three enzymatic components: pyruvate dehydrogenase (E1; phdA, phdB), dihydrolipoamide acetyltransferase (E2; phdC) and lipoamide dehydrogenase (E3; lpd).
DDB_G0273087	DDB_G0273087_ps	-0.949627	0.999718	0.510165	0.946346	-1.62561	0.0176189	n.s.	putative pseudogene; similar to Dictyostelium genes DDB_G0287167; there is a second copy of this gene, DDB_G0273801
DDB_G0276417	pdhB	-0.0638298	0.999718	-0.385134	0.893211	-1.06372	0.0160796	n.s.	catalyzes the reaction lipoamide + pyruvate <=> S-acetyldihydrolipoamide + CO2; E1 beta component of pyruvate dehydrogenase complex, which contains multiple copies of three enzymatic components: pyruvate dehydrogenase (E1; phdA, phdB), dihydrolipoamide acetyltransferase (E2; phdC) and lipoamide dehydrogenase (E3; lpd).
DDB_G0271564	pdhX	0.0338086	0.999718	-0.612942	0.428008	-1.18332	0.00279171	n.s.	putative ortholog of the pyruvate dehydrogenase complex component X (PDHX) that functions to link E2 (phdC; dihydrolipoamide acetyltransferase) to E3 (lpd; dihydrolipoamide dehydrogenase); in addition, the complex contains the E1 components (phdA, phdB)
DDB_G0273073	abcG17-1	-2.06182	1.66389e-07	1.51427	0.0765721	-1.25173	0.095723	-1.97572	full transporter, consisting of two ABC domains and two transmembrane domains; there is a second copy of this gene, abcG17-1
DDB_G0269364	stlA	-0.518392	0.999718	0.802693	0.601285	1.4023	0.0265168	-1.07555	belongs to the beta-ketoacyl synthase family; type III polyketide synthase; catalyzes iterative polyketide extension; from hexanoyl-CoA, can catalyze three polyketide chain extensions followed by aldol cyclization to synthesize demethyl-4-methyl-5-pentylbenzene-1,3-diol (MPBD); starter unit can vary from acyl CoA substrates ranging from 3-20 carbons
