# Supplementary material for: Investigation of the host transcriptional response to intracellular bacterial infection using Dictyostelium discoideum as a host model
Source: BMC Genomics. 2019 Dec 10;20:961. doi: 10.1186/s12864-019-6269-x (PMC6902447; doi:10.1186/s12864-019-6269-x)
Supplement: Supplementary file 7 — Additional file 7. Identified human orthologues for D. discoideum genes regulated in response to infection by mycobacteria, L. pneumophila or both. Gene IDs, regulation and KEGG pathway analyses for orthologous genes. [file 12864_2019_6269_MOESM7_ESM.xlsx]

## Sheet: Orthologue regulation
	D. discoideum				Human monocyte derived macrophages
Section	Dd ID	Mm 2.5 hpi	Lp 1 hpi	Lp 6 hpi	Uniprot ID	Name	Mtb 4 hpi	Mtb 18 hpi	Lp 8 hpi
A	DDB_G0276283	n.s.	down	n.s.	Q12788	TBL3	n.s.	down	down
A	DDB_G0285489	n.s.	down	n.s.	Q9UI30	TRMT112	n.d.	n.d.	n.d.
A	DDB_G0276947	n.s.	down	n.s.	Q12931	TRAP1	n.s.	down	down
A	DDB_G0270202	n.s.	down	n.s.	Q969E8	TSR2	n.s.	down	n.d.
A	DDB_G0293412	n.s.	down	n.s.	O43818	RRP9	n.s.	down	n.d.
A	DDB_G0290555	n.s.	down	n.s.	Q6RFH5	WDR74	n.s.	down	down
A	DDB_G0290029	n.s.	down	n.s.	Q969S3	ZNF622	n.s.	down	n.d.
A	DDB_G0278761	n.s.	up	n.s.	Q9P2E3	ZNFX1	n.s.	up	up
A	DDB_G0288565	n.s.	down	n.s.	Q13895	BYSL	n.s.	down	n.d.
A	DDB_G0269722	n.s.	down	n.s.	O43709	BUD23	n.d.	n.d.	n.d.
A	DDB_G0268762	n.s.	down	n.s.	Q9H6F5	CCDC86	n.s.	down	n.d.
A	DDB_G0287229	n.s.	up	n.s.	Q8NE62	CHDH	n.d.	n.d.	n.d.
A	DDB_G0280147	n.s.	down	n.s.	Q9H0S4	DDX47	n.d.	n.d.	up
A	DDB_G0274325	n.s.	down	n.s.	Q9Y2R4	DDX52	n.d.	n.d.	n.d.
A	DDB_G0284017	n.s.	down	n.s.	Q13206	DDX10	n.s.	down	n.d.
A	DDB_G0282741	n.s.	down	n.s.	Q9NVP1	DDX18	n.d.	n.d.	down
A	DDB_G0269312	n.s.	down	n.s.	Q9H501	ESF1	n.d.	n.d.	n.d.
A	DDB_G0291566	n.s.	down	n.s.	Q9BQ67	GRWD1	n.s.	down	n.d.
A	DDB_G0275759	n.s.	down	n.s.	O95602	POLR1A	n.s.	down	n.d.
A	DDB_G0272789	n.s.	down	n.s.	Q9UHA3	RSL24D1	n.d.	n.d.	n.d.
A	DDB_G0270336	n.s.	down	n.s.	Q8TEX9	IPO4	n.s.	down	n.d.
A	DDB_G0279245	n.s.	down	n.s.	O00566	MPHOSPH10	n.d.	n.d.	n.d.
A	DDB_G0268868	n.s.	down	n.s.	Q9H0A0	NAT10	n.s.	down	n.d.
A	DDB_G0295477	n.s.	down	n.s.	Q9Y221	NIP7	n.s.	down	n.d.
A	DDB_G0295761	n.s.	down	n.s.	Q9NVX2	NLE1	n.s.	down	n.d.
A	DDB_G0271306	n.s.	down	n.s.	Q96D46	NMD3	n.d.	n.d.	n.d.
A	DDB_G0285679	n.s.	down	n.s.	O00567	NOP56	n.s.	down	n.d.
A	DDB_G0285465	n.s.	down	n.s.	Q9BZE4	GTPBP4	n.d.	n.d.	up
A	DDB_G0292216	n.s.	down	n.s.	Q9H7B2	RPF2	n.s.	down	n.d.
A	DDB_G0268198	n.s.	down	n.s.	Q3B726	TWISTNB	n.d.	n.d.	n.d.
A	DDB_G0285829	n.s.	down	n.s.	Q9H9Y2	RPF1	n.d.	n.d.	n.d.
A	DDB_G0290181	n.s.	down	n.s.	Q14690	PDCD11	n.s.	down	n.d.
A	DDB_G0267416	n.s.	down	n.s.	O00411	POLRMT	n.s.	down	n.d.
A	DDB_G0278751	n.s.	down	n.s.	Q96EU6	RRP36	n.s.	down	n.d.
A	DDB_G0269304	n.s.	down	n.s.	Q6PI26	SHQ1	n.s.	down	down
A	DDB_G0294629	n.s.	down	n.s.	Q9H7B4	SMYD3	n.s.	down	n.d.
A	DDB_G0293118	n.s.	down	n.s.	Q9H7B4	SMYD3	n.s.	down	n.d.
A	DDB_G0294629	n.s.	down	n.s.	Q8NB12	SMYD1	n.d.	n.d.	n.d.
A	DDB_G0293118	n.s.	down	n.s.	Q8NB12	SMYD1	n.d.	n.d.	n.d.
A	DDB_G0294629	n.s.	down	n.s.	Q9NRG4	SMYD2	n.d.	n.d.	down
A	DDB_G0293118	n.s.	down	n.s.	Q9NRG4	SMYD2	n.d.	n.d.	down
A	DDB_G0278965	n.s.	down	n.s.	Q13395	TARBP1	n.d.	n.d.	down
B	DDB_G0277493	n.s.	n.s.	down	P40227	CCT6A	n.s.	down	n.d.
B	DDB_G0283391	n.s.	n.s.	down	Q96S53	TESK2	n.s.	up	n.d.
B	DDB_G0291830	n.s.	n.s.	up	Q9NWX6	THG1L	n.s.	down	n.d.
B	DDB_G0291816	n.s.	n.s.	down	Q16762	TST	n.d.	n.d.	down
B	DDB_G0288221	n.s.	n.s.	up	Q9UJW2	TINAG	n.d.	n.d.	n.d.
B	DDB_G0348374	n.s.	n.s.	down	Q9Y2S6	TMA7	n.s.	down	n.d.
B	DDB_G0269190	n.s.	n.s.	down	P17987	TCP1	n.s.	down	down
B	DDB_G0289907	n.s.	n.s.	down	P24821	TNC	n.d.	n.d.	up
B	DDB_G0269040	n.s.	n.s.	down	P24821	TNC	n.d.	n.d.	up
B	DDB_G0282475	n.s.	n.s.	up	Q8IVF5	TIAM2	n.d.	n.d.	n.d.
B	DDB_G0284911	n.s.	n.s.	down	P62072	TIMM10	n.s.	down	n.d.
B	DDB_G0268042	n.s.	n.s.	down	Q15185	PTGES3	n.d.	n.d.	n.d.
B	DDB_G0289907	n.s.	n.s.	down	P22105	TNXB	n.d.	n.d.	n.d.
B	DDB_G0269040	n.s.	n.s.	down	P22105	TNXB	n.d.	n.d.	n.d.
B	DDB_G0269906	n.s.	n.s.	up	Q6ZYL4	GTF2H5	n.s.	down	n.d.
B	DDB_G0291816	n.s.	n.s.	down	P25325	MPST	n.s.	down	n.d.
B	DDB_G0269766	n.s.	n.s.	down	Q8N2U0	TMEM256	n.s.	down	n.d.
B	DDB_G0291063	n.s.	n.s.	down	Q8NI27	THOC2	n.d.	n.d.	down
B	DDB_G0278781	n.s.	n.s.	up	Q8IWU9	TPH2	n.d.	n.d.	n.d.
B	DDB_G0283473	n.s.	n.s.	down	O43280	TREH	n.d.	n.d.	n.d.
B	DDB_G0269996	n.s.	n.s.	up	Q86UV7	TRIM73	n.d.	n.d.	n.d.
B	DDB_G0278781	n.s.	n.s.	up	P17752	TPH1	n.d.	n.d.	n.d.
B	DDB_G0274471	n.s.	n.s.	down	P60174	TPI1	n.d.	n.d.	n.d.
B	DDB_G0269996	n.s.	n.s.	up	Q86UV6	TRIM74	n.d.	n.d.	n.d.
B	DDB_G0269348	n.s.	n.s.	up	Q8IYL2	TRMT44	n.d.	n.d.	n.d.
B	DDB_G0286991	n.s.	n.s.	up	O15344	MID1	n.d.	n.d.	n.d.
B	DDB_G0286991	n.s.	n.s.	up	Q9UJV3	MID2	n.d.	n.d.	n.d.
B	DDB_G0269884	n.s.	n.s.	up	Q15650	TRIP4	n.s.	up	n.d.
B	DDB_G0279737	n.s.	n.s.	down	P11388	TOP2A	n.s.	down	n.d.
B	DDB_G0279737	n.s.	n.s.	down	Q02880	TOP2B	n.d.	n.d.	n.d.
B	DDB_G0279933	n.s.	n.s.	up	O60858	TRIM13	n.s.	up	down
B	DDB_G0280161	n.s.	n.s.	up	Q9HC21	SLC25A19	n.s.	down	n.d.
B	DDB_G0284947	n.s.	n.s.	down	P47985	UQCRFS1	n.s.	down	n.d.
B	DDB_G0284947	n.s.	n.s.	down	P0C7P4	UQCRFS1P1	n.d.	n.d.	n.d.
B	DDB_G0287965	n.s.	n.s.	up	Q13564	NAE1	n.d.	n.d.	n.d.
B	DDB_G0289449	n.s.	n.s.	up	P0CG48	UBC	n.s.	up	n.d.
B	DDB_G0280041	n.s.	n.s.	down	P11172	UMPS	n.s.	down	n.d.
B	DDB_G0286511	n.s.	n.s.	up	Q8N2K1	UBE2J2	n.d.	n.d.	n.d.
B	DDB_G0290629	n.s.	n.s.	up	Q9C0C9	UBE2O	n.d.	n.d.	n.d.
B	DDB_G0270042	n.s.	n.s.	down	O75643	SNRNP200	n.d.	n.d.	down
B	DDB_G0273191	n.s.	n.s.	down	P62861	FAU	n.s.	down	n.d.
B	DDB_G0285939	n.s.	n.s.	up	P18206	VCL	n.s.	down	n.d.
B	DDB_G0276221	n.s.	n.s.	down	Q641Q2	WASHC2A	n.d.	n.d.	n.d.
B	DDB_G0290297	n.s.	n.s.	up	O43543	XRCC2	n.s.	down	n.d.
B	DDB_G0276221	n.s.	n.s.	down	Q9Y4E1	WASHC2C	n.d.	n.d.	n.d.
B	DDB_G0276221	n.s.	n.s.	down	Q5SRD0	WASHC2D	n.d.	n.d.	n.d.
B	DDB_G0269442	n.s.	n.s.	down	Q86TI4	WDR86	n.d.	n.d.	n.d.
B	DDB_G0288659	n.s.	n.s.	down	Q9BV38	WDR18	n.s.	down	n.d.
B	DDB_G0270430	n.s.	n.s.	up	O43516	WIPF1	n.d.	n.d.	n.d.
B	DDB_G0276137	n.s.	n.s.	up	Q8IZH2	XRN1	n.d.	n.d.	n.d.
B	DDB_G0273067	n.s.	n.s.	up	O15537	RS1	n.d.	n.d.	n.d.
B	DDB_G0273065	n.s.	n.s.	up	O15537	RS1	n.d.	n.d.	n.d.
B	DDB_G0273063	n.s.	n.s.	up	O15537	RS1	n.d.	n.d.	n.d.
B	DDB_G0269890	n.s.	n.s.	up	A6XGL0	YJEFN3	n.d.	n.d.	n.d.
B	DDB_G0267990	n.s.	n.s.	up	Q96QA6	YPEL2	n.s.	up	n.d.
B	DDB_G0267990	n.s.	n.s.	up	P62699	YPEL5	n.s.	up	n.d.
B	DDB_G0267990	n.s.	n.s.	up	P61236	YPEL3	n.s.	up	n.d.
B	DDB_G0285413	n.s.	n.s.	up	Q8NB15	ZNF511	down	n.s.	n.d.
B	DDB_G0272202	n.s.	n.s.	up	Q8NHG8	ZNRF2	n.s.	up	n.d.
B	DDB_G0270362	n.s.	n.s.	up	Q8TCF1	ZFAND1	n.d.	n.d.	n.d.
B	DDB_G0276881	n.s.	n.s.	up	Q6FIF0	ZFAND6	n.d.	n.d.	down
B	DDB_G0275581	n.s.	n.s.	up	Q86UK7	ZNF598	n.s.	down	n.d.
B	DDB_G0276881	n.s.	n.s.	up	O76080	ZFAND5	n.s.	up	up
B	DDB_G0268092	n.s.	n.s.	up	Q19AV6	ZSWIM7	down	down	n.d.
B	DDB_G0278955	n.s.	n.s.	up	Q86U90	YRDC	n.s.	up	n.d.
B	DDB_G0272202	n.s.	n.s.	up	Q8ND25	ZNRF1	n.d.	n.d.	n.d.
B	DDB_G0267990	n.s.	n.s.	up	O60688	YPEL1	n.d.	n.d.	n.d.
B	DDB_G0267990	n.s.	n.s.	up	Q96NS1	YPEL4	n.d.	n.d.	n.d.
B	DDB_G0269438	n.s.	n.s.	up	O75312	ZPR1	n.d.	n.d.	n.d.
B	DDB_G0288387	n.s.	n.s.	down	Q13085	ACACA	n.s.	down	down
B	DDB_G0276321	n.s.	n.s.	up	Q68CK6	ACSM2B	n.d.	n.d.	n.d.
B	DDB_G0276321	n.s.	n.s.	up	Q08AH3	ACSM2A	n.d.	n.d.	n.d.
B	DDB_G0276321	n.s.	n.s.	up	Q08AH1	ACSM1	n.d.	n.d.	n.d.
B	DDB_G0276321	n.s.	n.s.	up	Q6P461	ACSM6	n.d.	n.d.	n.d.
B	DDB_G0274561	n.s.	n.s.	up	P62736	ACTA2	n.d.	n.d.	n.d.
B	DDB_G0274561	n.s.	n.s.	up	Q562R1	ACTBL2	n.d.	n.d.	n.d.
B	DDB_G0274561	n.s.	n.s.	up	P63261	ACTG1	n.d.	n.d.	n.d.
B	DDB_G0284831	n.s.	n.s.	up	Q96CM8	ACSF2	n.d.	n.d.	down
B	DDB_G0276321	n.s.	n.s.	up	Q53FZ2	ACSM3	n.d.	n.d.	n.d.
B	DDB_G0274561	n.s.	n.s.	up	P60709	ACTB	n.d.	n.d.	n.d.
B	DDB_G0274561	n.s.	n.s.	up	P68032	ACTC1	n.d.	n.d.	n.d.
B	DDB_G0277667	n.s.	n.s.	up	Q96P64	AGAP4	n.d.	n.d.	n.d.
B	DDB_G0293416	n.s.	n.s.	down	Q9NRK6	ABCB10	n.d.	n.d.	n.d.
B	DDB_G0276321	n.s.	n.s.	up	P0C7M7	ACSM4	n.d.	n.d.	n.d.
B	DDB_G0272861	n.s.	n.s.	down	Q9P1F3	ABRACL	n.d.	n.d.	n.d.
B	DDB_G0288387	n.s.	n.s.	down	O00763	ACACB	n.d.	n.d.	n.d.
B	DDB_G0277667	n.s.	n.s.	up	Q5VW22	AGAP6	n.d.	n.d.	n.d.
B	DDB_G0286109	n.s.	n.s.	up	O95490	ADGRL2	n.d.	n.d.	n.d.
B	DDB_G0287461	n.s.	n.s.	down	Q9H172	ABCG4	n.d.	n.d.	n.d.
B	DDB_G0269212	n.s.	n.s.	down	Q9H172	ABCG4	n.d.	n.d.	n.d.
B	DDB_G0270826	n.s.	n.s.	up	Q9H172	ABCG4	n.d.	n.d.	n.d.
B	DDB_G0287461	n.s.	n.s.	down	Q9H221	ABCG8	n.d.	n.d.	up
B	DDB_G0269212	n.s.	n.s.	down	Q9H221	ABCG8	n.d.	n.d.	up
B	DDB_G0270826	n.s.	n.s.	up	Q9H221	ABCG8	n.d.	n.d.	up
B	DDB_G0280977	n.s.	n.s.	up	Q96J66	ABCC11	n.d.	n.d.	n.d.
B	DDB_G0287609	n.s.	n.s.	up	P22760	AADAC	n.d.	n.d.	n.d.
B	DDB_G0278345	n.s.	n.s.	down	P53396	ACLY	n.d.	n.d.	down
B	DDB_G0287609	n.s.	n.s.	up	Q5VUY2	AADACL4	n.d.	n.d.	n.d.
B	DDB_G0290535	n.s.	n.s.	up	P30837	ALDH1B1	n.s.	down	n.d.
B	DDB_G0292270	n.s.	n.s.	up	P30838	ALDH3A1	n.d.	n.d.	n.d.
B	DDB_G0292270	n.s.	n.s.	up	P51648	ALDH3A2	n.d.	n.d.	down
B	DDB_G0285025	n.s.	n.s.	down	P15121	AKR1B1	up	up	down
B	DDB_G0286109	n.s.	n.s.	up	Q9HAR2	ADGRL3	n.d.	n.d.	n.d.
B	DDB_G0269450	n.s.	n.s.	up	Q9P0M2	AKAP7	n.d.	n.d.	n.d.
B	DDB_G0269450	n.s.	n.s.	up	O43687	AKAP7	n.d.	n.d.	n.d.
B	DDB_G0292270	n.s.	n.s.	up	P43353	ALDH3B1	n.d.	n.d.	down
B	DDB_G0290535	n.s.	n.s.	up	P05091	ALDH2	n.d.	n.d.	down
B	DDB_G0291468	n.s.	n.s.	up	Q8IZ07	ANKRD13A	n.d.	n.d.	down
B	DDB_G0291468	n.s.	n.s.	up	Q6ZTN6	ANKRD13D	n.d.	n.d.	n.d.
B	DDB_G0274775	n.s.	n.s.	down	E5RJM6	ANKRD65	n.d.	n.d.	n.d.
B	DDB_G0274561	n.s.	n.s.	up	P63267	ACTG2	n.d.	n.d.	n.d.
B	DDB_G0274561	n.s.	n.s.	up	P68133	ACTA1	n.d.	n.d.	n.d.
B	DDB_G0287609	n.s.	n.s.	up	Q5VUY0	AADACL3	n.d.	n.d.	n.d.
B	DDB_G0267454	n.s.	n.s.	down	P12235	SLC25A4	n.d.	n.d.	n.d.
B	DDB_G0267454	n.s.	n.s.	down	Q9H0C2	SLC25A31	n.d.	n.d.	n.d.
B	DDB_G0285025	n.s.	n.s.	down	O60218	AKR1B10	n.d.	n.d.	n.d.
B	DDB_G0293582	n.s.	n.s.	up	Q96BT7	ALKBH8	n.s.	down	n.d.
B	DDB_G0272582	n.s.	n.s.	up	P21397	MAOA	n.s.	up	n.d.
B	DDB_G0272582	n.s.	n.s.	up	P27338	MAOB	n.s.	up	n.d.
B	DDB_G0286695	n.s.	n.s.	up	Q9NPF8	ADAP2	down	down	down
B	DDB_G0287609	n.s.	n.s.	up	Q6P093	AADACL2	n.d.	n.d.	n.d.
B	DDB_G0267454	n.s.	n.s.	down	P05141	SLC25A5	n.s.	down	down
B	DDB_G0286109	n.s.	n.s.	up	Q9BY15	ADGRE3	n.d.	n.d.	n.d.
B	DDB_G0286109	n.s.	n.s.	up	O94910	ADGRL1	n.d.	n.d.	n.d.
B	DDB_G0274561	n.s.	n.s.	up	Q9BYX7	POTEKP	n.d.	n.d.	n.d.
B	DDB_G0290535	n.s.	n.s.	up	P00352	ALDH1A1	n.d.	n.d.	down
B	DDB_G0290535	n.s.	n.s.	up	P47895	ALDH1A3	n.d.	n.d.	n.d.
B	DDB_G0267454	n.s.	n.s.	down	P12236	SLC25A6	n.s.	down	n.d.
B	DDB_G0277667	n.s.	n.s.	up	A6NIR3	AGAP5	n.d.	n.d.	n.d.
B	DDB_G0290535	n.s.	n.s.	up	O94788	ALDH1A2	n.s.	up	n.d.
B	DDB_G0276321	n.s.	n.s.	up	Q6NUN0	ACSM5	n.d.	n.d.	n.d.
B	DDB_G0286695	n.s.	n.s.	up	O75689	ADAP1	n.d.	n.d.	n.d.
B	DDB_G0277667	n.s.	n.s.	up	Q5VUJ5	AGAP7P	n.d.	n.d.	n.d.
B	DDB_G0291926	n.s.	n.s.	up	Q12904	AIMP1	n.d.	n.d.	n.d.
B	DDB_G0277667	n.s.	n.s.	up	A8MT82	AGAP14	n.d.	n.d.	n.d.
B	DDB_G0285025	n.s.	n.s.	down	P14550	AKR1A1	n.s.	down	down
B	DDB_G0285025	n.s.	n.s.	down	C9JRZ8	AKR1B15	n.d.	n.d.	n.d.
B	DDB_G0283281	n.s.	n.s.	up	Q9HDC9	APMAP	n.d.	n.d.	n.d.
B	DDB_G0275333	n.s.	n.s.	up	Q68CP9	ARID2	n.s.	up	up
B	DDB_G0278981	n.s.	n.s.	up	Q9Y4X5	ARIH1	up	up	up
B	DDB_G0275333	n.s.	n.s.	up	Q8IVW6	ARID3B	n.s.	up	n.d.
B	DDB_G0285859	n.s.	n.s.	up	Q9NR80	ARHGEF4	n.d.	n.d.	n.d.
B	DDB_G0278981	n.s.	n.s.	up	O95376	ARIH2	n.d.	n.d.	n.d.
B	DDB_G0275333	n.s.	n.s.	up	A6NKF2	ARID3C	n.d.	n.d.	n.d.
B	DDB_G0291468	n.s.	n.s.	up	Q86YJ7	ANKRD13B	n.s.	down	n.d.
B	DDB_G0275097	n.s.	n.s.	up	Q3KP44	ANKRD55	n.d.	n.d.	n.d.
B	DDB_G0285859	n.s.	n.s.	up	O43307	ARHGEF9	n.s.	down	n.d.
B	DDB_G0292270	n.s.	n.s.	up	P48448	ALDH3B2	n.d.	n.d.	n.d.
B	DDB_G0274775	n.s.	n.s.	down	Q8IWZ3	ANKHD1	n.d.	n.d.	n.d.
B	DDB_G0270552	n.s.	n.s.	up	Q9H8Y5	ANKZF1	n.d.	n.d.	n.d.
B	DDB_G0276241	n.s.	n.s.	down	P56381	ATP5E	n.d.	n.d.	n.d.
B	DDB_G0285323	n.s.	n.s.	up	Q7Z3C6	ATG9A	n.d.	n.d.	down
B	DDB_G0290389	n.s.	n.s.	up	Q8N3C0	ASCC3	n.s.	down	n.d.
B	DDB_G0280455	n.s.	n.s.	up	Q9H1I8	ASCC2	n.s.	down	n.d.
B	DDB_G0293210	n.s.	n.s.	up	P17405	SMPD1	n.d.	n.d.	n.d.
B	DDB_G0275333	n.s.	n.s.	up	Q99856	ARID3A	up	up	up
B	DDB_G0286059	n.s.	n.s.	up	P08243	ASNS	n.s.	down	n.d.
B	DDB_G0292768	n.s.	n.s.	up	Q13510	ASAH1	n.d.	n.d.	n.d.
B	DDB_G0293538	n.s.	n.s.	up	Q9NR71	ASAH2	n.d.	n.d.	up
B	DDB_G0276241	n.s.	n.s.	down	Q5VTU8	ATP5EP2	n.d.	n.d.	n.d.
B	DDB_G0285323	n.s.	n.s.	up	Q674R7	ATG9B	n.d.	n.d.	n.d.
B	DDB_G0284429	n.s.	n.s.	up	Q02338	BDH1	n.s.	down	down
B	DDB_G0272466	n.s.	n.s.	down	Q02338	BDH1	n.s.	down	down
B	DDB_G0291676	n.s.	n.s.	down	Q02338	BDH1	n.s.	down	down
B	DDB_G0295807	n.s.	n.s.	down	Q02338	BDH1	n.s.	down	down
B	DDB_G0278655	n.s.	n.s.	up	Q02338	BDH1	n.s.	down	down
B	DDB_G0290659	n.s.	n.s.	down	Q02338	BDH1	n.s.	down	down
B	DDB_G0287515	n.s.	n.s.	up	P17735	TAT	n.d.	n.d.	n.d.
B	DDB_G0270200	n.s.	n.s.	up	Q7Z569	BRAP	n.d.	n.d.	n.d.
B	DDB_G0290217	n.s.	n.s.	up	P16278	GLB1	n.d.	n.d.	down
B	DDB_G0272218	n.s.	n.s.	up	C9JJ37	BTBD19	up	up	n.d.
B	DDB_G0290397	n.s.	n.s.	down	P11586	MTHFD1	n.s.	down	n.d.
B	DDB_G0279799	n.s.	n.s.	up	O60911	CTSV	n.s.	up	n.d.
B	DDB_G0290957	n.s.	n.s.	up	O60911	CTSV	n.s.	up	n.d.
B	DDB_G0276759	n.s.	n.s.	up	Q8WWF8	CAPSL	n.d.	n.d.	n.d.
B	DDB_G0272975	n.s.	n.s.	up	Q96Q07	BTBD9	n.s.	up	n.d.
B	DDB_G0290319	n.s.	n.s.	up	Q9Y3E2	BOLA1	down	down	n.d.
B	DDB_G0282409	n.s.	n.s.	down	Q9NPI1	BRD7	n.d.	n.d.	n.d.
B	DDB_G0282409	n.s.	n.s.	down	Q9H8M2	BRD9	n.s.	down	n.d.
B	DDB_G0290397	n.s.	n.s.	down	Q6UB35	MTHFD1L	n.s.	down	n.d.
B	DDB_G0277667	n.s.	n.s.	up	Q8ND76	CCNY	n.d.	n.d.	down
B	DDB_G0279411	n.s.	n.s.	down	P14091	CTSE	n.d.	n.d.	n.d.
B	DDB_G0277667	n.s.	n.s.	up	P0C7X3	CCNYL3	n.d.	n.d.	n.d.
B	DDB_G0279411	n.s.	n.s.	down	P07339	CTSD	n.d.	n.d.	n.d.
B	DDB_G0276759	n.s.	n.s.	up	Q13938	CAPS	n.d.	n.d.	n.d.
B	DDB_G0288933	n.s.	n.s.	up	P32320	CDA	n.s.	up	n.d.
B	DDB_G0287035	n.s.	n.s.	up	P16671	CD36	n.s.	down	n.d.
B	DDB_G0279799	n.s.	n.s.	up	P07711	CTSL	n.s.	up	n.d.
B	DDB_G0290957	n.s.	n.s.	up	P07711	CTSL	n.s.	up	n.d.
B	DDB_G0292680	n.s.	n.s.	down	Q567U6	CCDC93	n.s.	up	n.d.
B	DDB_G0275663	n.s.	n.s.	up	O95861	BPNT1	n.d.	n.d.	n.d.
B	DDB_G0277667	n.s.	n.s.	up	Q8N7R7	CCNYL1	n.d.	n.d.	n.d.
B	DDB_G0277667	n.s.	n.s.	up	Q5T2Q4	CCNYL2	n.d.	n.d.	n.d.
B	DDB_G0285079	n.s.	n.s.	down	Q9BYV8	CEP41	n.s.	down	n.d.
B	DDB_G0284171	n.s.	n.s.	down	O14646	CHD1	n.d.	n.d.	n.d.
B	DDB_G0284171	n.s.	n.s.	down	O14647	CHD2	n.s.	up	n.d.
B	DDB_G0286505	n.s.	n.s.	down	Q5T280	SPOUT1	n.d.	n.d.	n.d.
B	DDB_G0276969	n.s.	n.s.	up	Q9UKY3	CES1P1	n.d.	n.d.	n.d.
B	DDB_G0287335	n.s.	n.s.	down	Q14011	CIRBP	n.d.	n.d.	n.d.
B	DDB_G0283115	n.s.	n.s.	down	O96005	CLPTM1	n.d.	n.d.	n.d.
B	DDB_G0275311	n.s.	n.s.	down	O75390	CS	n.s.	down	down
B	DDB_G0285507	n.s.	n.s.	up	Q92989	CLP1	n.d.	n.d.	n.d.
B	DDB_G0284793	n.s.	n.s.	up	Q9BYD5	CNFN	n.d.	n.d.	n.d.
B	DDB_G0293166	n.s.	n.s.	up	Q8WXI2	CNKSR2	n.d.	n.d.	n.d.
B	DDB_G0285591	n.s.	n.s.	down	Q96DG6	CMBL	n.s.	down	n.d.
B	DDB_G0275847	n.s.	n.s.	up	Q9Y224	C14orf166	n.s.	down	n.d.
B	DDB_G0288831	n.s.	n.s.	down	Q14061	COX17	n.s.	up	n.d.
B	DDB_G0286419	n.s.	n.s.	up	P20815	CYP3A5	n.s.	up	n.d.
B	DDB_G0284535	n.s.	n.s.	down	P13584	CYP4B1	n.d.	n.d.	n.d.
B	DDB_G0284535	n.s.	n.s.	down	Q08477	CYP4F3	n.s.	up	n.d.
B	DDB_G0284535	n.s.	n.s.	down	Q9HCS2	CYP4F12	n.d.	n.d.	n.d.
B	DDB_G0293166	n.s.	n.s.	up	Q969H4	CNKSR1	n.d.	n.d.	n.d.
B	DDB_G0276865	n.s.	n.s.	up	P51798	CLCN7	n.d.	n.d.	down
B	DDB_G0286419	n.s.	n.s.	up	P24462	CYP3A7	n.d.	n.d.	n.d.
B	DDB_G0286419	n.s.	n.s.	up	P08684	CYP3A4	n.d.	n.d.	n.d.
B	DDB_G0284535	n.s.	n.s.	down	Q02928	CYP4A11	n.d.	n.d.	n.d.
B	DDB_G0284535	n.s.	n.s.	down	P78329	CYP4F2	n.d.	n.d.	n.d.
B	DDB_G0284535	n.s.	n.s.	down	Q8N1L4	CYP4Z2P	n.d.	n.d.	n.d.
B	DDB_G0269388	n.s.	n.s.	down	P57737	CORO7	n.s.	down	n.d.
B	DDB_G0286419	n.s.	n.s.	up	Q9HB55	CYP3A43	n.d.	n.d.	n.d.
B	DDB_G0284535	n.s.	n.s.	down	Q86W10	CYP4Z1	n.d.	n.d.	n.d.
B	DDB_G0291466	n.s.	n.s.	up	Q99708	RBBP8	n.d.	n.d.	n.d.
B	DDB_G0284535	n.s.	n.s.	down	Q5TCH4	CYP4A22	n.d.	n.d.	n.d.
B	DDB_G0284535	n.s.	n.s.	down	P98187	CYP4F8	n.d.	n.d.	n.d.
B	DDB_G0284535	n.s.	n.s.	down	Q9HBI6	CYP4F11	n.s.	up	n.d.
B	DDB_G0284535	n.s.	n.s.	down	Q8N118	CYP4X1	n.d.	n.d.	n.d.
B	DDB_G0272114	n.s.	n.s.	up	Q9P1W3	TMEM63C	n.d.	n.d.	n.d.
B	DDB_G0282971	n.s.	n.s.	up	Q9P1W3	TMEM63C	n.d.	n.d.	n.d.
B	DDB_G0272114	n.s.	n.s.	up	O94886	TMEM63A	n.d.	n.d.	n.d.
B	DDB_G0282971	n.s.	n.s.	up	O94886	TMEM63A	n.d.	n.d.	n.d.
B	DDB_G0272114	n.s.	n.s.	up	Q5T3F8	TMEM63B	up	up	up
B	DDB_G0282971	n.s.	n.s.	up	Q5T3F8	TMEM63B	up	up	up
B	DDB_G0282921	n.s.	n.s.	up	Q7Z7A3	CTU1	n.s.	down	n.d.
B	DDB_G0287101	n.s.	n.s.	up	P04839	CYBB	n.s.	up	down
B	DDB_G0284535	n.s.	n.s.	down	Q6NT55	CYP4F22	n.d.	n.d.	n.d.
B	DDB_G0282055	n.s.	n.s.	up	Q5VWQ8	DAB2IP	n.d.	n.d.	n.d.
B	DDB_G0291318	n.s.	n.s.	down	Q9BQY9	DBNDD2	n.d.	n.d.	n.d.
B	DDB_G0288187	n.s.	n.s.	up	Q8WTU0	DDI1	n.d.	n.d.	n.d.
B	DDB_G0275537	n.s.	n.s.	down	P99999	CYCS	n.d.	n.d.	n.d.
B	DDB_G0278753	n.s.	n.s.	up	O43169	CYB5B	n.d.	n.d.	n.d.
B	DDB_G0278753	n.s.	n.s.	up	P00167	CYB5A	n.s.	down	n.d.
B	DDB_G0285725	n.s.	n.s.	up	P49366	DHPS	n.d.	n.d.	down
B	DDB_G0284713	n.s.	n.s.	up	P06746	POLB	n.s.	down	n.d.
B	DDB_G0283727	n.s.	n.s.	down	P0CG22	DHRS4L1	n.d.	n.d.	n.d.
B	DDB_G0291648	n.s.	n.s.	down	P09622	DLD	n.d.	n.d.	down
B	DDB_G0278757	n.s.	n.s.	up	Q8IYB7	DIS3L2	n.d.	n.d.	n.d.
B	DDB_G0292992	n.s.	n.s.	down	Q8TDD1	DDX54	n.s.	down	n.d.
B	DDB_G0284429	n.s.	n.s.	up	P37059	HSD17B2	n.d.	n.d.	up
B	DDB_G0272466	n.s.	n.s.	down	P37059	HSD17B2	n.d.	n.d.	up
B	DDB_G0291676	n.s.	n.s.	down	P37059	HSD17B2	n.d.	n.d.	up
B	DDB_G0295807	n.s.	n.s.	down	P37059	HSD17B2	n.d.	n.d.	up
B	DDB_G0278655	n.s.	n.s.	up	P37059	HSD17B2	n.d.	n.d.	up
B	DDB_G0290659	n.s.	n.s.	down	P37059	HSD17B2	n.d.	n.d.	up
B	DDB_G0284429	n.s.	n.s.	up	Q9BPW9	DHRS9	n.d.	n.d.	n.d.
B	DDB_G0272466	n.s.	n.s.	down	Q9BPW9	DHRS9	n.d.	n.d.	n.d.
B	DDB_G0291676	n.s.	n.s.	down	Q9BPW9	DHRS9	n.d.	n.d.	n.d.
B	DDB_G0295807	n.s.	n.s.	down	Q9BPW9	DHRS9	n.d.	n.d.	n.d.
B	DDB_G0278655	n.s.	n.s.	up	Q9BPW9	DHRS9	n.d.	n.d.	n.d.
B	DDB_G0290659	n.s.	n.s.	down	Q9BPW9	DHRS9	n.d.	n.d.	n.d.
B	DDB_G0283727	n.s.	n.s.	down	Q9BTZ2	DHRS4	n.d.	n.d.	down
B	DDB_G0291694	n.s.	n.s.	up	Q8NEL9	DDHD1	n.d.	n.d.	up
B	DDB_G0288187	n.s.	n.s.	up	Q5TDH0	DDI2	n.d.	n.d.	n.d.
B	DDB_G0273061	n.s.	n.s.	up	O60869	EDF1	n.d.	n.d.	n.d.
B	DDB_G0284713	n.s.	n.s.	up	Q9UGP5	POLL	n.d.	n.d.	n.d.
B	DDB_G0281963	n.s.	n.s.	up	Q9UNI6	DUSP12	n.s.	down	n.d.
B	DDB_G0281963	n.s.	n.s.	up	Q99956	DUSP9	n.d.	n.d.	n.d.
B	DDB_G0293222	n.s.	n.s.	up	Q8N5C7	DTWD1	n.d.	n.d.	n.d.
B	DDB_G0281963	n.s.	n.s.	up	Q9BY84	DUSP16	n.s.	up	up
B	DDB_G0283727	n.s.	n.s.	down	Q6PKH6	DHRS4L2	n.d.	n.d.	down
B	DDB_G0282261	n.s.	n.s.	up	Q13011	ECH1	n.d.	n.d.	n.d.
B	DDB_G0284429	n.s.	n.s.	up	Q8NEX9	SDR9C7	n.d.	n.d.	n.d.
B	DDB_G0272466	n.s.	n.s.	down	Q8NEX9	SDR9C7	n.d.	n.d.	n.d.
B	DDB_G0291676	n.s.	n.s.	down	Q8NEX9	SDR9C7	n.d.	n.d.	n.d.
B	DDB_G0295807	n.s.	n.s.	down	Q8NEX9	SDR9C7	n.d.	n.d.	n.d.
B	DDB_G0278655	n.s.	n.s.	up	Q8NEX9	SDR9C7	n.d.	n.d.	n.d.
B	DDB_G0290659	n.s.	n.s.	down	Q8NEX9	SDR9C7	n.d.	n.d.	n.d.
B	DDB_G0278803	n.s.	n.s.	up	Q6P1R4	DUS1L	n.s.	down	down
B	DDB_G0287333	n.s.	n.s.	down	O75822	EIF3J	n.d.	n.d.	up
B	DDB_G0277569	n.s.	n.s.	up	Q9NXB9	ELOVL2	n.d.	n.d.	n.d.
B	DDB_G0274669	n.s.	n.s.	up	Q9H5J4	ELOVL6	up	n.s.	n.d.
B	DDB_G0274669	n.s.	n.s.	up	Q9HB03	ELOVL3	n.s.	up	n.d.
B	DDB_G0279689	n.s.	n.s.	up	Q7Z2Z2	EFL1	n.d.	n.d.	n.d.
B	DDB_G0277569	n.s.	n.s.	up	Q9NYP7	ELOVL5	n.d.	n.d.	n.d.
B	DDB_G0277569	n.s.	n.s.	up	A1L3X0	ELOVL7	n.s.	up	up
B	DDB_G0288613	n.s.	n.s.	up	P62495	ETF1	n.s.	up	n.d.
B	DDB_G0276969	n.s.	n.s.	up	O00748	CES2	n.s.	up	n.d.
B	DDB_G0277569	n.s.	n.s.	up	Q9BW60	ELOVL1	n.d.	n.d.	down
B	DDB_G0269226	n.s.	n.s.	down	P48449	LSS	n.s.	up	n.d.
B	DDB_G0276969	n.s.	n.s.	up	P23141	CES1	n.s.	up	n.d.
B	DDB_G0272734	n.s.	n.s.	up	Q9BSJ8	ESYT1	n.d.	n.d.	n.d.
B	DDB_G0285683	n.s.	n.s.	up	Q13347	EIF3I	n.d.	n.d.	n.d.
B	DDB_G0272076	n.s.	n.s.	down	Q9Y262	EIF3L	n.s.	down	down
B	DDB_G0277569	n.s.	n.s.	up	Q9GZR5	ELOVL4	n.d.	n.d.	n.d.
B	DDB_G0283163	n.s.	n.s.	up	Q13144	EIF2B5	n.s.	down	n.d.
B	DDB_G0290103	n.s.	n.s.	up	Q9H9T3	ELP3	n.s.	down	down
B	DDB_G0278729	n.s.	n.s.	up	P19447	ERCC3	n.s.	up	down
B	DDB_G0276969	n.s.	n.s.	up	Q6NT32	CES5A	n.d.	n.d.	n.d.
B	DDB_G0291310	n.s.	n.s.	down	Q13868	EXOSC2	n.s.	down	down
B	DDB_G0269364	n.s.	n.s.	up	P49327	FASN	n.s.	down	n.d.
B	DDB_G0275069	n.s.	n.s.	down	P49327	FASN	n.s.	down	n.d.
B	DDB_G0272734	n.s.	n.s.	up	A0FGR8	ESYT2	n.s.	up	n.d.
B	DDB_G0272734	n.s.	n.s.	up	A0FGR9	ESYT3	n.d.	n.d.	n.d.
B	DDB_G0289779	n.s.	n.s.	up	P31513	FMO3	n.d.	n.d.	n.d.
B	DDB_G0269878	n.s.	n.s.	down	P22087	FBL	n.s.	down	n.d.
B	DDB_G0270836	n.s.	n.s.	up	O00757	FBP2	n.d.	n.d.	n.d.
B	DDB_G0269878	n.s.	n.s.	down	A6NHQ2	FBLL1	n.d.	n.d.	n.d.
B	DDB_G0270836	n.s.	n.s.	up	P09467	FBP1	n.d.	n.d.	down
B	DDB_G0292744	n.s.	n.s.	up	Q9NW38	FANCL	n.d.	n.d.	n.d.
B	DDB_G0275227	n.s.	n.s.	down	P62942	FKBP1A	n.s.	down	n.d.
B	DDB_G0275227	n.s.	n.s.	down	P68106	FKBP1B	n.d.	n.d.	n.d.
B	DDB_G0289779	n.s.	n.s.	up	O60774	FMO6P	n.d.	n.d.	n.d.
B	DDB_G0278735	n.s.	n.s.	down	P14324	FDPS	n.s.	down	n.d.
B	DDB_G0289779	n.s.	n.s.	up	P49326	FMO5	n.d.	n.d.	n.d.
B	DDB_G0289779	n.s.	n.s.	up	Q01740	FMO1	n.d.	n.d.	n.d.
B	DDB_G0289779	n.s.	n.s.	up	Q99518	FMO2	n.d.	n.d.	n.d.
B	DDB_G0289779	n.s.	n.s.	up	P31512	FMO4	n.d.	n.d.	n.d.
B	DDB_G0284551	n.s.	n.s.	up	Q6P4F1	FUT10	n.d.	n.d.	n.d.
B	DDB_G0284551	n.s.	n.s.	up	Q495W5	FUT11	n.s.	up	down
B	DDB_G0273131	n.s.	n.s.	down	P11413	G6PD	n.d.	n.d.	n.d.
B	DDB_G0275295	n.s.	n.s.	down	Q14376	GALE	n.s.	down	n.d.
B	DDB_G0274391	n.s.	n.s.	up	P04066	FUCA1	n.s.	down	n.d.
B	DDB_G0276661	n.s.	n.s.	up	P04066	FUCA1	n.s.	down	n.d.
B	DDB_G0272002	n.s.	n.s.	up	Q2WGJ9	FER1L6	n.d.	n.d.	down
B	DDB_G0279013	n.s.	n.s.	down	Q9NY12	GAR1	n.s.	down	n.d.
B	DDB_G0274105	n.s.	n.s.	down	Q04446	GBE1	n.s.	up	down
B	DDB_G0290217	n.s.	n.s.	up	Q6UWU2	GLB1L	n.d.	n.d.	down
B	DDB_G0288481	n.s.	n.s.	down	P30793	GCH1	n.s.	up	up
B	DDB_G0279487	n.s.	n.s.	down	Q92616	GCN1	n.d.	n.d.	n.d.
B	DDB_G0290217	n.s.	n.s.	up	Q8NCI6	GLB1L3	n.d.	n.d.	n.d.
B	DDB_G0283151	n.s.	n.s.	up	P04899	GNAI2	n.d.	n.d.	down
B	DDB_G0291652	n.s.	n.s.	down	P34896	SHMT1	n.s.	down	n.d.
B	DDB_G0277947	n.s.	n.s.	down	P34896	SHMT1	n.s.	down	n.d.
B	DDB_G0291652	n.s.	n.s.	down	P34897	SHMT2	n.s.	down	down
B	DDB_G0277947	n.s.	n.s.	down	P34897	SHMT2	n.s.	down	down
B	DDB_G0283151	n.s.	n.s.	up	P11488	GNAT1	n.d.	n.d.	n.d.
B	DDB_G0287255	n.s.	n.s.	down	P23378	GLDC	n.d.	n.d.	n.d.
B	DDB_G0290217	n.s.	n.s.	up	Q8IW92	GLB1L2	n.s.	down	n.d.
B	DDB_G0283151	n.s.	n.s.	up	P08754	GNAI3	n.d.	n.d.	n.d.
B	DDB_G0283151	n.s.	n.s.	up	P09471	GNAO1	n.d.	n.d.	n.d.
B	DDB_G0283151	n.s.	n.s.	up	A8MTJ3	GNAT3	n.d.	n.d.	n.d.
B	DDB_G0283151	n.s.	n.s.	up	P19087	GNAT2	n.d.	n.d.	n.d.
B	DDB_G0292104	n.s.	n.s.	down	Q9UBQ7	GRHPR	n.s.	down	n.d.
B	DDB_G0271892	n.s.	n.s.	down	P0CG29	GSTT2	n.s.	down	n.d.
B	DDB_G0283763	n.s.	n.s.	down	Q9HAV7	GRPEL1	n.d.	n.d.	n.d.
B	DDB_G0271892	n.s.	n.s.	down	P0CG30	GSTT2B	n.s.	down	n.d.
B	DDB_G0283763	n.s.	n.s.	down	Q8TAA5	GRPEL2	n.d.	n.d.	n.d.
B	DDB_G0271892	n.s.	n.s.	down	P30711	GSTT1	n.d.	n.d.	n.d.
B	DDB_G0278261	n.s.	n.s.	down	Q8TDB8	SLC2A14	up	up	n.d.
B	DDB_G0278261	n.s.	n.s.	down	Q9NRM0	SLC2A9	n.s.	down	down
B	DDB_G0284429	n.s.	n.s.	up	O14756	HSD17B6	n.d.	n.d.	n.d.
B	DDB_G0272466	n.s.	n.s.	down	O14756	HSD17B6	n.d.	n.d.	n.d.
B	DDB_G0291676	n.s.	n.s.	down	O14756	HSD17B6	n.d.	n.d.	n.d.
B	DDB_G0295807	n.s.	n.s.	down	O14756	HSD17B6	n.d.	n.d.	n.d.
B	DDB_G0278655	n.s.	n.s.	up	O14756	HSD17B6	n.d.	n.d.	n.d.
B	DDB_G0290659	n.s.	n.s.	down	O14756	HSD17B6	n.d.	n.d.	n.d.
B	DDB_G0283151	n.s.	n.s.	up	P19086	GNAZ	n.d.	n.d.	n.d.
B	DDB_G0278261	n.s.	n.s.	down	P11169	SLC2A3	up	up	n.d.
B	DDB_G0281551	n.s.	n.s.	down	P49915	GMPS	n.s.	down	down
B	DDB_G0278261	n.s.	n.s.	down	P11166	SLC2A1	up	up	n.d.
B	DDB_G0278261	n.s.	n.s.	down	P11168	SLC2A2	n.d.	n.d.	n.d.
B	DDB_G0278261	n.s.	n.s.	down	P14672	SLC2A4	n.d.	n.d.	n.d.
B	DDB_G0272754	n.s.	n.s.	down	P00390	GSR	n.d.	n.d.	down
B	DDB_G0283151	n.s.	n.s.	up	P63096	GNAI1	n.d.	n.d.	n.d.
B	DDB_G0290085	n.s.	n.s.	down	Q9NPB8	GPCPD1	n.d.	n.d.	n.d.
B	DDB_G0289439	n.s.	n.s.	down	Q9BX68	HINT2	n.s.	down	n.d.
B	DDB_G0292586	n.s.	n.s.	down	Q15034	HERC3	n.s.	up	down
B	DDB_G0285193	n.s.	n.s.	down	P00492	HPRT1	n.d.	n.d.	down
B	DDB_G0292586	n.s.	n.s.	down	Q5GLZ8	HERC4	n.s.	up	n.d.
B	DDB_G0289439	n.s.	n.s.	down	P49773	HINT1	n.d.	n.d.	down
B	DDB_G0287659	n.s.	n.s.	up	P07686	HEXB	n.d.	n.d.	down
B	DDB_G0287659	n.s.	n.s.	up	P06865	HEXA	n.d.	n.d.	n.d.
B	DDB_G0288691	n.s.	n.s.	down	Q9UJC3	HOOK1	n.d.	n.d.	n.d.
B	DDB_G0280215	n.s.	n.s.	up	O14558	HSPB6	n.d.	n.d.	n.d.
B	DDB_G0288691	n.s.	n.s.	down	Q96ED9	HOOK2	n.d.	n.d.	n.d.
B	DDB_G0288691	n.s.	n.s.	down	Q86VS8	HOOK3	n.d.	n.d.	n.d.
B	DDB_G0272632	n.s.	n.s.	down	O60760	HPGDS	n.s.	down	n.d.
B	DDB_G0268138	n.s.	n.s.	down	O60760	HPGDS	n.s.	down	n.d.
B	DDB_G0275669	n.s.	n.s.	up	Q9UF12	PRODH2	n.d.	n.d.	n.d.
B	DDB_G0293166	n.s.	n.s.	up	Q8WWN9	IPCEF1	n.d.	n.d.	n.d.
B	DDB_G0288289	n.s.	n.s.	down	P35475	IDUA	n.s.	down	n.d.
B	DDB_G0276493	n.s.	n.s.	up	P56537	EIF6	n.d.	n.d.	n.d.
B	DDB_G0275741	n.s.	n.s.	up	P55073	DIO3	n.d.	n.d.	n.d.
B	DDB_G0272799	n.s.	n.s.	up	O60725	ICMT	n.s.	down	down
B	DDB_G0275741	n.s.	n.s.	up	P49895	DIO1	n.d.	n.d.	n.d.
B	DDB_G0271344	n.s.	n.s.	down	P50213	IDH3A	n.d.	n.d.	n.d.
B	DDB_G0281239	n.s.	n.s.	down	O14732	IMPA2	n.s.	down	n.d.
B	DDB_G0281239	n.s.	n.s.	down	P29218	IMPA1	n.d.	n.d.	n.d.
B	DDB_G0291179	n.s.	n.s.	down	Q00266	MAT1A	n.d.	n.d.	n.d.
B	DDB_G0276087	n.s.	n.s.	up	Q99685	MGLL	n.d.	n.d.	n.d.
B	DDB_G0279059	n.s.	n.s.	down	P20645	M6PR	n.d.	n.d.	n.d.
B	DDB_G0286699	n.s.	n.s.	down	P20645	M6PR	n.d.	n.d.	n.d.
B	DDB_G0288777	n.s.	n.s.	down	O75439	PMPCB	n.d.	n.d.	down
B	DDB_G0292994	n.s.	n.s.	down	P29803	PDHA2	n.d.	n.d.	n.d.
B	DDB_G0292994	n.s.	n.s.	down	P08559	PDHA1	n.s.	down	down
B	DDB_G0270778	n.s.	n.s.	up	Q6N063	OGFOD2	n.d.	n.d.	n.d.
B	DDB_G0272002	n.s.	n.s.	up	Q9HC10	OTOF	n.d.	n.d.	n.d.
B	DDB_G0274273	n.s.	n.s.	up	P0C869	PLA2G4B	n.d.	n.d.	n.d.
B	DDB_G0276417	n.s.	n.s.	down	P11177	PDHB	n.s.	down	down
B	DDB_G0291301	n.s.	n.s.	up	Q96RQ9	IL4I1	n.s.	up	n.d.
B	DDB_G0271472	n.s.	n.s.	up	Q96RQ9	IL4I1	n.s.	up	n.d.
B	DDB_G0274273	n.s.	n.s.	up	Q86XP0	PLA2G4D	n.d.	n.d.	n.d.
B	DDB_G0290401	n.s.	n.s.	down	Q8TE04	PANK1	n.s.	down	n.d.
B	DDB_G0274273	n.s.	n.s.	up	P47712	PLA2G4A	n.s.	down	n.d.
B	DDB_G0274273	n.s.	n.s.	up	Q68DD2	PLA2G4F	n.d.	n.d.	n.d.
B	DDB_G0279411	n.s.	n.s.	down	P0DJD8	PGA3	n.d.	n.d.	n.d.
B	DDB_G0279411	n.s.	n.s.	down	P0DJD7	PGA4	n.d.	n.d.	n.d.
B	DDB_G0279411	n.s.	n.s.	down	P20142	PGC	n.d.	n.d.	up
B	DDB_G0274273	n.s.	n.s.	up	Q9UP65	PLA2G4C	n.d.	n.d.	n.d.
B	DDB_G0274273	n.s.	n.s.	up	Q3MJ16	PLA2G4E	n.s.	up	n.d.
B	DDB_G0290401	n.s.	n.s.	down	Q9H999	PANK3	n.d.	n.d.	n.d.
B	DDB_G0293542	n.s.	n.s.	up	O14832	PHYH	n.s.	down	n.d.
B	DDB_G0290401	n.s.	n.s.	down	Q9NVE7	PANK4	n.d.	n.d.	down
B	DDB_G0290401	n.s.	n.s.	down	Q9BZ23	PANK2	n.d.	n.d.	up
B	DDB_G0291434	n.s.	n.s.	down	P13667	PDIA4	n.d.	n.d.	n.d.
B	DDB_G0283987	n.s.	n.s.	down	P22234	PAICS	n.s.	down	n.d.
B	DDB_G0302511	n.s.	n.s.	down	Q59GN2	RPL39P5	n.d.	n.d.	n.d.
B	DDB_G0288145	n.s.	n.s.	down	O15067	PFAS	n.s.	down	n.d.
B	DDB_G0288333	n.s.	n.s.	down	P30566	ADSL	n.s.	down	down
B	DDB_G0272440	n.s.	n.s.	down	Q53FA7	TP53I3	n.s.	down	n.d.
B	DDB_G0283603	n.s.	n.s.	down	O14966	RAB29	n.d.	n.d.	n.d.
B	DDB_G0280567	n.s.	n.s.	down	P17812	CTPS1	n.s.	down	n.d.
B	DDB_G0288777	n.s.	n.s.	down	P31930	UQCRC1	n.s.	down	n.d.
B	DDB_G0270750	n.s.	n.s.	up	Q7Z6M1	RABEPK	n.s.	down	down
B	DDB_G0276967	n.s.	n.s.	up	P63000	RAC1	n.d.	n.d.	n.d.
B	DDB_G0276335	n.s.	n.s.	down	P27708	CAD	n.s.	down	down
B	DDB_G0275753	n.s.	n.s.	down	O00233	PSMD9	n.d.	n.d.	n.d.
B	DDB_G0268042	n.s.	n.s.	down	E9PB15	PTGES3L	n.d.	n.d.	n.d.
B	DDB_G0287335	n.s.	n.s.	down	O75526	RBMXL2	n.d.	n.d.	n.d.
B	DDB_G0273051	n.s.	n.s.	down	Q9NRR4	DROSHA	n.d.	n.d.	n.d.
B	DDB_G0276633	n.s.	n.s.	up	Q9BQ52	ELAC2	n.s.	down	n.d.
B	DDB_G0288983	n.s.	n.s.	down	P09001	MRPL3	n.s.	down	n.d.
B	DDB_G0278039	n.s.	n.s.	down	P52434	POLR2H	n.s.	down	down
B	DDB_G0270984	n.s.	n.s.	down	Q969Q0	RPL36AL	n.d.	n.d.	n.d.
B	DDB_G0278195	n.s.	n.s.	down	Q86TS9	MRPL52	n.d.	n.d.	down
B	DDB_G0287335	n.s.	n.s.	down	Q96E39	RBMXL1	up	n.s.	n.d.
B	DDB_G0270984	n.s.	n.s.	down	P83881	RPL36A	n.s.	down	n.d.
B	DDB_G0281093	n.s.	n.s.	down	P61513	RPL37A	n.s.	down	n.d.
B	DDB_G0286289	n.s.	n.s.	up	Q9UBS8	RNF14	n.d.	n.d.	n.d.
B	DDB_G0283861	n.s.	n.s.	down	Q9BYD2	MRPL9	n.s.	down	down
B	DDB_G0274407	n.s.	n.s.	down	P52815	MRPL12	n.s.	down	n.d.
B	DDB_G0279827	n.s.	n.s.	down	P26440	IVD	n.s.	down	down
B	DDB_G0279459	n.s.	n.s.	down	P46013	MKI67	n.s.	down	n.d.
B	DDB_G0280967	n.s.	n.s.	down	Q12840	KIF5A	n.d.	n.d.	n.d.
B	DDB_G0280967	n.s.	n.s.	down	O60282	KIF5C	n.d.	n.d.	up
B	DDB_G0270018	n.s.	n.s.	down	Q06136	KDSR	n.d.	n.d.	n.d.
B	DDB_G0281049	n.s.	n.s.	up	Q14847	LASP1	n.d.	n.d.	n.d.
B	DDB_G0286581	n.s.	n.s.	up	Q9H6V9	LDAH	n.d.	n.d.	n.d.
B	DDB_G0278375	n.s.	n.s.	down	Q9BQ90	KLHDC3	n.s.	down	down
B	DDB_G0275667	n.s.	n.s.	up	Q96EK9	KTI12	n.d.	n.d.	n.d.
B	DDB_G0269816	n.s.	n.s.	up	O60870	KIN	n.s.	up	n.d.
B	DDB_G0280967	n.s.	n.s.	down	P33176	KIF5B	n.d.	n.d.	down
B	DDB_G0281763	n.s.	n.s.	up	P05455	SSB	n.d.	n.d.	n.d.
B	DDB_G0269848	n.s.	n.s.	up	Q6UWP7	LCLAT1	n.s.	down	n.d.
B	DDB_G0275713	n.s.	n.s.	down	Q6P5S2	LEG1	n.d.	n.d.	n.d.
B	DDB_G0291900	n.s.	n.s.	up	Q96B70	LENG9	n.d.	n.d.	n.d.
B	DDB_G0286051	n.s.	n.s.	down	Q8WVC0	LEO1	n.s.	down	n.d.
B	DDB_G0284203	n.s.	n.s.	down	Q16719	KYNU	n.s.	up	n.d.
B	DDB_G0270806	n.s.	n.s.	down	Q86WU2	LDHD	n.s.	down	n.d.
B	DDB_G0278471	n.s.	n.s.	down	O95202	LETM1	n.s.	down	n.d.
B	DDB_G0294094	n.s.	n.s.	down	Q96L50	LRR1	n.s.	down	n.d.
B	DDB_G0269790	n.s.	n.s.	down	P10253	GAA	n.d.	n.d.	n.d.
B	DDB_G0276529	n.s.	n.s.	down	Q8WV35	LRRC29	n.s.	up	n.d.
B	DDB_G0281987	n.s.	n.s.	up	O43325	LYRM1	up	up	n.d.
B	DDB_G0274875	n.s.	n.s.	up	O94822	LTN1	n.d.	n.d.	down
B	DDB_G0275917	n.s.	n.s.	down	O00462	MANBA	n.s.	up	n.d.
B	DDB_G0279433	n.s.	n.s.	down	P53582	METAP1	n.d.	n.d.	down
B	DDB_G0278563	n.s.	n.s.	down	O75951	LYZL6	n.d.	n.d.	n.d.
B	DDB_G0293938	n.s.	n.s.	down	Q96EH3	MALSU1	n.s.	down	n.d.
B	DDB_G0269642	n.s.	n.s.	down	Q9BXY0	MAK16	n.s.	down	n.d.
B	DDB_G0291722	n.s.	n.s.	up	O43934	MFSD11	n.s.	up	down
B	DDB_G0278563	n.s.	n.s.	down	P61626	LYZ	n.d.	n.d.	n.d.
B	DDB_G0278563	n.s.	n.s.	down	Q96KX0	LYZL4	n.d.	n.d.	n.d.
B	DDB_G0284463	n.s.	n.s.	up	Q7L5Y9	MAEA	n.d.	n.d.	n.d.
B	DDB_G0269964	n.s.	n.s.	up	Q14728	MFSD10	n.d.	n.d.	n.d.
B	DDB_G0285859	n.s.	n.s.	up	P10911	MCF2	n.d.	n.d.	n.d.
B	DDB_G0293556	n.s.	n.s.	down	O43772	SLC25A20	n.d.	n.d.	n.d.
B	DDB_G0291179	n.s.	n.s.	down	P31153	MAT2A	n.s.	down	n.d.
B	DDB_G0278095	n.s.	n.s.	down	Q9BV79	MECR	n.s.	down	n.d.
B	DDB_G0291145	n.s.	n.s.	down	Q8IXL7	MSRB3	n.d.	n.d.	n.d.
B	DDB_G0280039	n.s.	n.s.	up	Q9UBC5	MYO1A	n.d.	n.d.	n.d.
B	DDB_G0276345	n.s.	n.s.	down	P61599	NAA20	n.d.	n.d.	n.d.
B	DDB_G0291145	n.s.	n.s.	down	Q9Y3D2	MSRB2	n.d.	n.d.	n.d.
B	DDB_G0291127	n.s.	n.s.	up	Q14764	MVP	n.d.	n.d.	n.d.
B	DDB_G0287593	n.s.	n.s.	up	Q5T3U5	ABCC10	n.d.	n.d.	n.d.
B	DDB_G0280977	n.s.	n.s.	up	Q96J65	ABCC12	n.d.	n.d.	n.d.
B	DDB_G0277883	n.s.	n.s.	up	Q02817	MUC2	n.d.	n.d.	n.d.
B	DDB_G0277883	n.s.	n.s.	up	Q6W4X9	MUC6	n.d.	n.d.	n.d.
B	DDB_G0278529	n.s.	n.s.	up	P39210	MPV17	n.d.	n.d.	down
B	DDB_G0280977	n.s.	n.s.	up	O15440	ABCC5	n.d.	n.d.	n.d.
B	DDB_G0279137	n.s.	n.s.	down	P42898	MTHFR	n.d.	n.d.	down
B	DDB_G0277883	n.s.	n.s.	up	P98088	MUC5AC	n.d.	n.d.	n.d.
B	DDB_G0277883	n.s.	n.s.	up	Q9HC84	MUC5B	n.d.	n.d.	n.d.
B	DDB_G0291099	n.s.	n.s.	up	Q9BUK6	MSTO1	n.s.	down	down
B	DDB_G0292768	n.s.	n.s.	up	Q02083	NAAA	n.s.	down	n.d.
B	DDB_G0267768	n.s.	n.s.	down	Q9HB07	C12orf10	n.d.	n.d.	n.d.
B	DDB_G0279411	n.s.	n.s.	down	O96009	NAPSA	n.d.	n.d.	up
B	DDB_G0284915	n.s.	n.s.	down	Q96GX9	APIP	n.d.	n.d.	n.d.
B	DDB_G0277883	n.s.	n.s.	up	Q7Z5P9	MUC19	n.d.	n.d.	n.d.
B	DDB_G0275075	n.s.	n.s.	down	Q9BXJ9	NAA15	n.s.	down	n.d.
B	DDB_G0275075	n.s.	n.s.	down	Q6N069	NAA16	n.d.	n.d.	down
B	DDB_G0278863	n.s.	n.s.	down	Q9HC98	NEK6	n.d.	n.d.	n.d.
B	DDB_G0267786	n.s.	n.s.	up	Q96TA1	FAM129B	n.s.	up	n.d.
B	DDB_G0291732	n.s.	n.s.	down	Q9HBL8	NMRAL1	n.s.	down	n.d.
B	DDB_G0275053	n.s.	n.s.	down	Q9HBL8	NMRAL1	n.s.	down	n.d.
B	DDB_G0272476	n.s.	n.s.	down	O43678	NDUFA2	n.d.	n.d.	n.d.
B	DDB_G0278863	n.s.	n.s.	down	Q8TDX7	NEK7	n.d.	n.d.	n.d.
B	DDB_G0287101	n.s.	n.s.	up	Q9HBY0	NOX3	n.d.	n.d.	n.d.
B	DDB_G0269658	n.s.	n.s.	down	Q5VVY1	METTL11B	n.d.	n.d.	n.d.
B	DDB_G0282615	n.s.	n.s.	down	Q7L592	NDUFAF7	n.d.	n.d.	n.d.
B	DDB_G0287609	n.s.	n.s.	up	Q6PIU2	NCEH1	n.s.	up	n.d.
B	DDB_G0282055	n.s.	n.s.	up	Q9UJF2	RASAL2	n.s.	up	n.d.
B	DDB_G0267786	n.s.	n.s.	up	Q9BZQ8	FAM129A	up	up	n.d.
B	DDB_G0267786	n.s.	n.s.	up	Q86XR2	FAM129C	n.d.	n.d.	n.d.
B	DDB_G0276657	n.s.	n.s.	up	O15118	NPC1	up	up	up
B	DDB_G0269890	n.s.	n.s.	up	Q8NCW5	NAXE	n.d.	n.d.	n.d.
B	DDB_G0287101	n.s.	n.s.	up	Q9Y5S8	NOX1	n.d.	n.d.	n.d.
B	DDB_G0287101	n.s.	n.s.	up	Q9NPH5	NOX4	n.d.	n.d.	n.d.
B	DDB_G0276657	n.s.	n.s.	up	Q9UHC9	NPC1L1	n.d.	n.d.	n.d.
B	DDB_G0292714	n.s.	n.s.	up	Q7Z494	NPHP3	n.s.	up	n.d.
B	DDB_G0289583	n.s.	n.s.	up	O60524	NEMF	n.d.	n.d.	n.d.
B	DDB_G0269658	n.s.	n.s.	down	Q9BV86	NTMT1	n.s.	down	n.d.
B	DDB_G0288347	n.s.	n.s.	down	Q9NPE3	NOP10	n.d.	n.d.	down
B	DDB_G0278781	n.s.	n.s.	up	P00439	PAH	n.d.	n.d.	n.d.
B	DDB_G0284331	n.s.	n.s.	up	O76083	PDE9A	n.s.	up	up
B	DDB_G0277537	n.s.	n.s.	down	P42356	PI4KA	n.d.	n.d.	down
B	DDB_G0277537	n.s.	n.s.	down	A4QPH2	PI4KAP2	n.d.	n.d.	n.d.
B	DDB_G0272999	n.s.	n.s.	up	Q9P0L9	PKD2L1	n.s.	down	n.d.
B	DDB_G0284793	n.s.	n.s.	up	Q9NZF1	PLAC8	n.d.	n.d.	n.d.
B	DDB_G0279411	n.s.	n.s.	down	P0DJD9	PGA5	n.d.	n.d.	n.d.
B	DDB_G0292528	n.s.	n.s.	down	O00625	PIR	n.d.	n.d.	down
B	DDB_G0274561	n.s.	n.s.	up	Q6S8J3	POTEE	n.d.	n.d.	n.d.
B	DDB_G0282611	n.s.	n.s.	up	Q9HAB8	PPCS	n.d.	n.d.	down
B	DDB_G0271506	n.s.	n.s.	down	Q5JRX3	PITRM1	up	n.s.	n.d.
B	DDB_G0267490	n.s.	n.s.	up	Q2TBC4	PRICKLE4	n.s.	up	n.d.
B	DDB_G0272999	n.s.	n.s.	up	Q13563	PKD2	n.d.	n.d.	down
B	DDB_G0283663	n.s.	n.s.	down	Q08752	PPID	n.d.	n.d.	n.d.
B	DDB_G0285859	n.s.	n.s.	up	Q96PX9	PLEKHG4B	n.d.	n.d.	n.d.
B	DDB_G0285741	n.s.	n.s.	down	P30044	PRDX5	n.s.	down	down
B	DDB_G0291133	n.s.	n.s.	up	Q99640	PKMYT1	n.s.	down	n.d.
B	DDB_G0277537	n.s.	n.s.	down	Q8N8J0	PI4KAP1	n.d.	n.d.	n.d.
B	DDB_G0272999	n.s.	n.s.	up	Q9NZM6	PKD2L2	n.d.	n.d.	n.d.
B	DDB_G0287149	n.s.	n.s.	up	Q9UBT6	POLK	n.d.	n.d.	down
B	DDB_G0275669	n.s.	n.s.	up	O43272	PRODH	n.d.	n.d.	n.d.
B	DDB_G0272374	n.s.	n.s.	down	O94906	PRPF6	n.d.	n.d.	down
B	DDB_G0277087	n.s.	n.s.	down	P31939	ATIC	n.s.	down	n.d.
B	DDB_G0284669	n.s.	n.s.	down	P60891	PRPS1	n.s.	down	n.d.
B	DDB_G0279095	n.s.	n.s.	down	Q03393	PTS	n.s.	up	n.d.
B	DDB_G0280067	n.s.	n.s.	down	Q8NI37	PPTC7	n.d.	n.d.	n.d.
B	DDB_G0284669	n.s.	n.s.	down	P21108	PRPS1L1	n.d.	n.d.	n.d.
B	DDB_G0280401	n.s.	n.s.	down	Q13427	PPIG	n.d.	n.d.	n.d.
B	DDB_G0285193	n.s.	n.s.	down	Q9NRG1	PRTFDC1	n.s.	down	n.d.
B	DDB_G0284669	n.s.	n.s.	down	P11908	PRPS2	n.s.	down	n.d.
B	DDB_G0280997	n.s.	n.s.	down	Q08257	CRYZ	n.d.	n.d.	n.d.
B	DDB_G0282055	n.s.	n.s.	up	Q86YV0	RASAL3	n.d.	n.d.	n.d.
B	DDB_G0280567	n.s.	n.s.	down	Q9NRF8	CTPS2	n.d.	n.d.	n.d.
B	DDB_G0283603	n.s.	n.s.	down	Q13637	RAB32	n.s.	down	down
B	DDB_G0283603	n.s.	n.s.	down	P57729	RAB38	n.d.	n.d.	up
B	DDB_G0276967	n.s.	n.s.	up	P15153	RAC2	n.s.	up	n.d.
B	DDB_G0284429	n.s.	n.s.	up	Q92781	RDH5	n.d.	n.d.	n.d.
B	DDB_G0272466	n.s.	n.s.	down	Q92781	RDH5	n.d.	n.d.	n.d.
B	DDB_G0291676	n.s.	n.s.	down	Q92781	RDH5	n.d.	n.d.	n.d.
B	DDB_G0295807	n.s.	n.s.	down	Q92781	RDH5	n.d.	n.d.	n.d.
B	DDB_G0278655	n.s.	n.s.	up	Q92781	RDH5	n.d.	n.d.	n.d.
B	DDB_G0290659	n.s.	n.s.	down	Q92781	RDH5	n.d.	n.d.	n.d.
B	DDB_G0269378	n.s.	n.s.	up	O60671	RAD1	n.d.	n.d.	n.d.
B	DDB_G0287335	n.s.	n.s.	down	A6NDE4	RBMY1B	n.d.	n.d.	n.d.
B	DDB_G0287335	n.s.	n.s.	down	P98179	RBM3	n.d.	n.d.	n.d.
B	DDB_G0287335	n.s.	n.s.	down	A6NEQ0	RBMY1E	n.d.	n.d.	n.d.
B	DDB_G0293468	n.s.	n.s.	down	Q8IZ40	RCOR2	n.d.	n.d.	n.d.
B	DDB_G0283547	n.s.	n.s.	up	Q8TAI7	RHEBL1	n.s.	down	n.d.
B	DDB_G0291840	n.s.	n.s.	up	Q7Z5H3	ARHGAP22	n.s.	down	n.d.
B	DDB_G0290891	n.s.	n.s.	up	Q7Z5H3	ARHGAP22	n.s.	down	n.d.
B	DDB_G0276967	n.s.	n.s.	up	P60763	RAC3	n.d.	n.d.	n.d.
B	DDB_G0293468	n.s.	n.s.	down	Q9P2K3	RCOR3	n.d.	n.d.	down
B	DDB_G0291466	n.s.	n.s.	up	Q8NC74	RBBP8NL	n.d.	n.d.	n.d.
B	DDB_G0287335	n.s.	n.s.	down	P0DJD4	RBMY1C	n.d.	n.d.	n.d.
B	DDB_G0293468	n.s.	n.s.	down	Q9UKL0	RCOR1	n.s.	up	n.d.
B	DDB_G0287335	n.s.	n.s.	down	P38159	RBMX	n.s.	down	n.d.
B	DDB_G0287335	n.s.	n.s.	down	P0DJD3	RBMY1A1	n.d.	n.d.	n.d.
B	DDB_G0287335	n.s.	n.s.	down	Q15415	RBMY1F	n.d.	n.d.	n.d.
B	DDB_G0284429	n.s.	n.s.	up	O75452	RDH16	n.d.	n.d.	n.d.
B	DDB_G0272466	n.s.	n.s.	down	O75452	RDH16	n.d.	n.d.	n.d.
B	DDB_G0291676	n.s.	n.s.	down	O75452	RDH16	n.d.	n.d.	n.d.
B	DDB_G0295807	n.s.	n.s.	down	O75452	RDH16	n.d.	n.d.	n.d.
B	DDB_G0278655	n.s.	n.s.	up	O75452	RDH16	n.d.	n.d.	n.d.
B	DDB_G0290659	n.s.	n.s.	down	O75452	RDH16	n.d.	n.d.	n.d.
B	DDB_G0279411	n.s.	n.s.	down	P00797	REN	n.d.	n.d.	n.d.
B	DDB_G0273033	n.s.	n.s.	up	P41220	RGS2	up	up	up
B	DDB_G0287335	n.s.	n.s.	down	P0C7P1	RBMY1D	n.d.	n.d.	n.d.
B	DDB_G0273033	n.s.	n.s.	up	Q9NS28	RGS18	n.d.	n.d.	n.d.
B	DDB_G0273033	n.s.	n.s.	up	P57771	RGS8	n.d.	n.d.	n.d.
B	DDB_G0273033	n.s.	n.s.	up	Q08116	RGS1	n.d.	n.d.	up
B	DDB_G0291840	n.s.	n.s.	up	Q8N264	ARHGAP24	up	up	n.d.
B	DDB_G0290891	n.s.	n.s.	up	Q8N264	ARHGAP24	up	up	n.d.
B	DDB_G0291840	n.s.	n.s.	up	P42331	ARHGAP25	n.d.	n.d.	n.d.
B	DDB_G0290891	n.s.	n.s.	up	P42331	ARHGAP25	n.d.	n.d.	n.d.
B	DDB_G0273033	n.s.	n.s.	up	O14921	RGS13	n.d.	n.d.	n.d.
B	DDB_G0273033	n.s.	n.s.	up	O15492	RGS16	n.s.	up	n.d.
B	DDB_G0288295	n.s.	n.s.	down	P30050	RPL12	n.s.	down	n.d.
B	DDB_G0273033	n.s.	n.s.	up	Q2M5E4	RGS21	n.d.	n.d.	n.d.
B	DDB_G0273033	n.s.	n.s.	up	P49798	RGS4	n.d.	n.d.	n.d.
B	DDB_G0273033	n.s.	n.s.	up	O43665	RGS10	n.s.	down	n.d.
B	DDB_G0273033	n.s.	n.s.	up	P49795	RGS19	n.d.	n.d.	down
B	DDB_G0283547	n.s.	n.s.	up	Q15382	RHEB	n.s.	up	n.d.
B	DDB_G0273033	n.s.	n.s.	up	Q9UGC6	RGS17	n.d.	n.d.	n.d.
B	DDB_G0273033	n.s.	n.s.	up	O76081	RGS20	n.d.	n.d.	down
B	DDB_G0273033	n.s.	n.s.	up	O15539	RGS5	n.d.	n.d.	n.d.
B	DDB_G0290315	n.s.	n.s.	down	P62829	RPL23	n.s.	down	n.d.
B	DDB_G0286389	n.s.	n.s.	down	P49207	RPL34	n.s.	down	n.d.
B	DDB_G0279387	n.s.	n.s.	down	P46778	RPL21	n.s.	down	n.d.
B	DDB_G0270380	n.s.	n.s.	down	P62888	RPL30	n.s.	down	n.d.
B	DDB_G0281093	n.s.	n.s.	down	A6NKH3	RPL37AP8	n.d.	n.d.	n.d.
B	DDB_G0302511	n.s.	n.s.	down	Q96EH5	RPL39L	n.s.	down	n.d.
B	DDB_G0302511	n.s.	n.s.	down	P62891	RPL39	n.s.	down	n.d.
B	DDB_G0279061	n.s.	n.s.	down	P62899	RPL31	n.s.	down	n.d.
B	DDB_G0281293	n.s.	n.s.	down	O00584	RNASET2	n.s.	down	n.d.
B	DDB_G0269996	n.s.	n.s.	up	Q8N5U6	RNF10	n.s.	up	n.d.
B	DDB_G0273425	n.s.	n.s.	up	Q9Y535	POLR3H	n.s.	down	down
B	DDB_G0278275	n.s.	n.s.	down	Q2QD12	RPEL1	n.d.	n.d.	n.d.
B	DDB_G0290311	n.s.	n.s.	down	Q9H2W6	MRPL46	n.s.	down	n.d.
B	DDB_G0278275	n.s.	n.s.	down	Q96AT9	RPE	n.s.	down	down
B	DDB_G0267766	n.s.	n.s.	down	Q969S9	GFM2	n.d.	n.d.	n.d.
B	DDB_G0284093	n.s.	n.s.	down	P62249	RPS16	n.s.	down	n.d.
B	DDB_G0292882	n.s.	n.s.	down	P82933	MRPS9	n.s.	down	n.d.
B	DDB_G0277635	n.s.	n.s.	down	Q71UM5	RPS27L	n.d.	n.d.	down
B	DDB_G0272308	n.s.	n.s.	down	P62273	RPS29	n.s.	down	n.d.
B	DDB_G0277635	n.s.	n.s.	down	P42677	RPS27	n.d.	n.d.	n.d.
B	DDB_G0285597	n.s.	n.s.	down	P62857	RPS28	n.d.	n.d.	n.d.
B	DDB_G0268518	n.s.	n.s.	down	Q96E11	MRRF	n.s.	down	n.d.
B	DDB_G0277515	n.s.	n.s.	down	Q9UHI7	SLC23A1	n.d.	n.d.	n.d.
B	DDB_G0277515	n.s.	n.s.	down	Q9UGH3	SLC23A2	n.s.	down	n.d.
B	DDB_G0287003	n.s.	n.s.	down	Q5T1Q4	SLC35F1	n.d.	n.d.	n.d.
B	DDB_G0286651	n.s.	n.s.	down	P07602	PSAP	n.s.	down	n.d.
B	DDB_G0279705	n.s.	n.s.	up	P07602	PSAP	n.s.	down	n.d.
B	DDB_G0269762	n.s.	n.s.	down	Q9Y3D5	MRPS18C	n.d.	n.d.	n.d.
B	DDB_G0278563	n.s.	n.s.	down	Q8IXA5	SPACA3	n.d.	n.d.	n.d.
B	DDB_G0281699	n.s.	n.s.	down	P51398	DAP3	n.d.	n.d.	down
B	DDB_G0268074	n.s.	n.s.	down	P58743	SLC26A5	n.d.	n.d.	n.d.
B	DDB_G0268074	n.s.	n.s.	down	Q9BXS9	SLC26A6	n.d.	n.d.	n.d.
B	DDB_G0282673	n.s.	n.s.	down	Q2M3R5	SLC35G1	n.d.	n.d.	n.d.
B	DDB_G0287003	n.s.	n.s.	down	Q8IXU6	SLC35F2	n.s.	down	up
B	DDB_G0277515	n.s.	n.s.	down	Q6PIS1	SLC23A3	n.d.	n.d.	n.d.
B	DDB_G0268074	n.s.	n.s.	down	O43511	SLC26A4	n.d.	n.d.	n.d.
B	DDB_G0286651	n.s.	n.s.	down	Q6NUJ1	PSAPL1	n.d.	n.d.	n.d.
B	DDB_G0279705	n.s.	n.s.	up	Q6NUJ1	PSAPL1	n.d.	n.d.	n.d.
B	DDB_G0293060	n.s.	n.s.	up	Q6UWP8	SBSN	n.s.	up	n.d.
B	DDB_G0269254	n.s.	n.s.	up	Q6UWP8	SBSN	n.s.	up	n.d.
B	DDB_G0278117	n.s.	n.s.	down	P60468	SEC61B	n.d.	n.d.	n.d.
B	DDB_G0275603	n.s.	n.s.	down	Q8WU79	SMAP2	n.s.	up	n.d.
B	DDB_G0272260	n.s.	n.s.	up	Q9BX95	SGPP1	n.d.	n.d.	n.d.
B	DDB_G0287035	n.s.	n.s.	up	Q14108	SCARB2	n.d.	n.d.	n.d.
B	DDB_G0294094	n.s.	n.s.	down	Q9UQ13	SHOC2	n.d.	n.d.	n.d.
B	DDB_G0287035	n.s.	n.s.	up	Q8WTV0	SCARB1	n.s.	down	n.d.
B	DDB_G0272324	n.s.	n.s.	up	Q9Y3A5	SBDS	n.d.	n.d.	n.d.
B	DDB_G0277257	n.s.	n.s.	down	Q96EE3	SEH1L	n.d.	n.d.	n.d.
B	DDB_G0273343	n.s.	n.s.	up	Q9BSV6	TSEN34	n.s.	up	n.d.
B	DDB_G0269768	n.s.	n.s.	down	Q86TU7	SETD3	n.d.	n.d.	down
B	DDB_G0273393	n.s.	n.s.	up	Q9H7B4	SMYD3	n.s.	down	n.d.
B	DDB_G0277915	n.s.	n.s.	up	Q07890	SOS2	n.s.	up	down
B	DDB_G0273393	n.s.	n.s.	up	Q8NB12	SMYD1	n.d.	n.d.	n.d.
B	DDB_G0267420	n.s.	n.s.	down	P00441	SOD1	n.s.	down	n.d.
B	DDB_G0282715	n.s.	n.s.	up	Q07837	SLC3A1	n.d.	n.d.	n.d.
B	DDB_G0270776	n.s.	n.s.	up	Q8TB22	SPATA20	n.s.	down	down
B	DDB_G0275027	n.s.	n.s.	down	Q9GZT3	SLIRP	n.s.	down	n.d.
B	DDB_G0271732	n.s.	n.s.	up	P38935	IGHMBP2	n.s.	up	n.d.
B	DDB_G0275603	n.s.	n.s.	down	Q8IYB5	SMAP1	n.s.	up	down
B	DDB_G0272260	n.s.	n.s.	up	Q8IWX5	SGPP2	n.s.	up	up
B	DDB_G0275167	n.s.	n.s.	up	Q14765	STAT4	up	up	up
B	DDB_G0273393	n.s.	n.s.	up	Q9NRG4	SMYD2	n.d.	n.d.	down
B	DDB_G0275167	n.s.	n.s.	up	P42229	STAT5A	n.s.	down	up
B	DDB_G0267730	n.s.	n.s.	down	Q9Y6E0	STK24	n.s.	up	n.d.
B	DDB_G0273003	n.s.	n.s.	down	P62318	SNRPD3	n.s.	down	n.d.
B	DDB_G0277915	n.s.	n.s.	up	Q07889	SOS1	n.d.	n.d.	n.d.
B	DDB_G0284145	n.s.	n.s.	up	Q9UGK8	SERGEF	n.s.	down	down
B	DDB_G0267586	n.s.	n.s.	up	Q9UGK8	SERGEF	n.s.	down	down
B	DDB_G0275845	n.s.	n.s.	down	Q96Q15	SMG1	n.d.	n.d.	up
B	DDB_G0271350	n.s.	n.s.	up	Q8WYL5	SSH1	n.d.	n.d.	down
B	DDB_G0271350	n.s.	n.s.	up	Q8TE77	SSH3	n.d.	n.d.	n.d.
B	DDB_G0275167	n.s.	n.s.	up	P42224	STAT1	n.d.	n.d.	n.d.
B	DDB_G0275167	n.s.	n.s.	up	P42226	STAT6	n.s.	up	n.d.
B	DDB_G0285859	n.s.	n.s.	up	Q96N96	SPATA13	n.s.	up	n.d.
B	DDB_G0275167	n.s.	n.s.	up	P51692	STAT5B	n.d.	n.d.	n.d.
B	DDB_G0275167	n.s.	n.s.	up	P52630	STAT2	n.d.	n.d.	n.d.
B	DDB_G0267730	n.s.	n.s.	down	O00506	STK25	n.d.	n.d.	n.d.
B	DDB_G0287159	n.s.	n.s.	up	Q9HA77	CARS2	n.s.	down	n.d.
B	DDB_G0287467	n.s.	n.s.	up	P07814	EPRS	n.s.	down	down
B	DDB_G0284197	n.s.	n.s.	up	P07814	EPRS	n.s.	down	down
B	DDB_G0274159	n.s.	n.s.	up	P49590	HARS2	n.d.	n.d.	n.d.
B	DDB_G0293030	n.s.	n.s.	down	Q9NSE4	IARS2	n.d.	n.d.	down
B	DDB_G0267730	n.s.	n.s.	down	Q9P289	STK26	n.d.	n.d.	n.d.
B	DDB_G0287159	n.s.	n.s.	up	P49589	CARS	n.d.	n.d.	n.d.
B	DDB_G0274159	n.s.	n.s.	up	P12081	HARS	n.d.	n.d.	n.d.
B	DDB_G0275167	n.s.	n.s.	up	P40763	STAT3	up	up	n.d.
B	DDB_G0271842	n.s.	n.s.	down	Q9P2R7	SUCLA2	n.d.	n.d.	n.d.
B	DDB_G0282055	n.s.	n.s.	up	Q96PV0	SYNGAP1	n.s.	up	n.d.
B	DDB_G0285451	n.s.	n.s.	up	Q9P2J5	LARS	n.s.	down	down
B	DDB_G0272867	n.s.	n.s.	up	Q5T160	RARS2	n.d.	n.d.	down
B	DDB_G0288267	n.s.	n.s.	up	Q9BW92	TARS2	n.d.	n.d.	n.d.
B	DDB_G0288267	n.s.	n.s.	up	A2RTX5	TARSL2	n.d.	n.d.	n.d.
B	DDB_G0289481	n.s.	n.s.	up	P47897	QARS	n.s.	down	down
B	DDB_G0269454	n.s.	n.s.	up	P23381	WARS	n.s.	up	n.d.
B	DDB_G0288267	n.s.	n.s.	up	P26639	TARS	up	up	down
B	DDB_G0287307	n.s.	n.s.	up	P29084	GTF2E2	n.d.	n.d.	n.d.
B	DDB_G0288699	n.s.	n.s.	up	A0PK00	TMEM120B	n.s.	down	n.d.
B	DDB_G0287131	n.s.	n.s.	up	P13984	GTF2F2	n.d.	n.d.	n.d.
B	DDB_G0277493	n.s.	n.s.	down	Q92526	CCT6B	n.d.	n.d.	n.d.
B	DDB_G0283391	n.s.	n.s.	down	Q15569	TESK1	n.d.	n.d.	n.d.
B	DDB_G0272696	n.s.	n.s.	down	Q5T011	SZT2	n.d.	n.d.	n.d.
B	DDB_G0288699	n.s.	n.s.	up	Q9BXJ8	TMEM120A	n.d.	n.d.	n.d.
B	DDB_G0282575	n.s.	n.s.	down	Q9P2M4	TBC1D14	n.d.	n.d.	down
B	DDB_G0274217	n.s.	n.s.	up	Q9BQ70	TCF25	n.d.	n.d.	down
B	DDB_G0289907	n.s.	n.s.	down	Q16473	TNXA	n.d.	n.d.	up
B	DDB_G0269040	n.s.	n.s.	down	Q16473	TNXA	n.d.	n.d.	up
B	DDB_G0282575	n.s.	n.s.	down	O60347	TBC1D12	n.d.	n.d.	n.d.
B	DDB_G0269368	n.s.	n.s.	up	Q8N2H4	SYS1	n.d.	n.d.	n.d.
B	DDB_G0291922	n.s.	n.s.	up	Q16635	TAZ	n.d.	n.d.	n.d.
B	DDB_G0291358	n.s.	n.s.	down	P78371	CCT2	n.s.	down	n.d.
C	DDB_G0293504	n.s.	up	up	Q96Q11	TRNT1	n.d.	n.d.	n.d.
C	DDB_G0278331	n.s.	down	down	Q2NL82	TSR1	n.d.	n.d.	n.d.
C	DDB_G0271240	n.s.	down	down	Q9Y5J1	UTP18	n.d.	n.d.	n.d.
C	DDB_G0279083	n.s.	down	down	O75691	UTP20	n.s.	down	n.d.
C	DDB_G0279371	n.s.	down	down	Q5TAP6	UTP14C	n.d.	n.d.	n.d.
C	DDB_G0280489	n.s.	down	down	O15213	WDR46	n.s.	down	n.d.
C	DDB_G0279371	n.s.	down	down	Q9BVJ6	UTP14A	n.s.	down	n.d.
C	DDB_G0277019	n.s.	down	down	Q8NI36	WDR36	n.s.	down	down
C	DDB_G0275141	n.s.	down	down	Q15061	WDR43	n.d.	n.d.	n.d.
C	DDB_G0282623	n.s.	down	down	Q9UNX4	WDR3	n.s.	down	n.d.
C	DDB_G0279903	n.s.	down	down	Q9GZL7	WDR12	n.s.	down	down
C	DDB_G0292898	n.s.	down	down	O95336	PGLS	n.d.	n.d.	n.d.
C	DDB_G0275023	n.s.	up	up	P62736	ACTA2	n.d.	n.d.	n.d.
C	DDB_G0275023	n.s.	up	up	Q562R1	ACTBL2	n.d.	n.d.	n.d.
C	DDB_G0275023	n.s.	up	up	P63261	ACTG1	n.d.	n.d.	n.d.
C	DDB_G0275023	n.s.	up	up	P60709	ACTB	n.d.	n.d.	n.d.
C	DDB_G0275023	n.s.	up	up	P68032	ACTC1	n.d.	n.d.	n.d.
C	DDB_G0269344	n.s.	down	down	Q13685	AAMP	n.s.	down	n.d.
C	DDB_G0292458	n.s.	down	down	Q9Y305	ACOT9	n.d.	n.d.	n.d.
C	DDB_G0275023	n.s.	up	up	P63267	ACTG2	n.d.	n.d.	n.d.
C	DDB_G0275023	n.s.	up	up	P68133	ACTA1	n.d.	n.d.	n.d.
C	DDB_G0280267	n.s.	up	up	Q8N6M5	ALLC	n.d.	n.d.	n.d.
C	DDB_G0291998	n.s.	up	up	P54802	NAGLU	n.s.	down	n.d.
C	DDB_G0275023	n.s.	up	up	Q9BYX7	POTEKP	n.d.	n.d.	n.d.
C	DDB_G0273105	n.s.	down	down	O00767	SCD	n.s.	down	down
C	DDB_G0277137	n.s.	up	up	Q6ZNB7	AGMO	n.d.	n.d.	n.d.
C	DDB_G0286849	n.s.	up	up	Q02338	BDH1	n.s.	down	down
C	DDB_G0275559	n.s.	up	up	Q02338	BDH1	n.s.	down	down
C	DDB_G0290329	n.s.	down	down	Q02338	BDH1	n.s.	down	down
C	DDB_G0287891	n.s.	down	down	Q14692	BMS1	n.s.	down	down
C	DDB_G0287937	n.s.	down	down	Q8TDN6	BRIX1	n.s.	down	n.d.
C	DDB_G0269800	n.s.	up	up	Q13112	CHAF1B	n.s.	down	down
C	DDB_G0281839	n.s.	down	down	Q14137	BOP1	n.s.	down	n.d.
C	DDB_G0279205	n.s.	down	down	Q03701	CEBPZ	n.d.	n.d.	n.d.
C	DDB_G0280257	n.s.	down	down	Q9BQ75	CMSS1	n.s.	down	n.d.
C	DDB_G0282419	n.s.	up	up	P20815	CYP3A5	n.s.	up	n.d.
C	DDB_G0282419	n.s.	up	up	P24462	CYP3A7	n.d.	n.d.	n.d.
C	DDB_G0282419	n.s.	up	up	P08684	CYP3A4	n.d.	n.d.	n.d.
C	DDB_G0282419	n.s.	up	up	Q9HB55	CYP3A43	n.d.	n.d.	n.d.
C	DDB_G0291227	n.s.	down	down	P30825	SLC7A1	n.d.	n.d.	n.d.
C	DDB_G0291227	n.s.	down	down	Q8WY07	SLC7A3	n.d.	n.d.	n.d.
C	DDB_G0276815	n.s.	down	down	Q9NV06	DCAF13	n.d.	n.d.	n.d.
C	DDB_G0281841	n.s.	down	down	Q9GZR7	DDX24	n.d.	n.d.	n.d.
C	DDB_G0291227	n.s.	down	down	P52569	SLC7A2	n.d.	n.d.	up
C	DDB_G0291227	n.s.	down	down	O43246	SLC7A4	n.d.	n.d.	n.d.
C	DDB_G0269966	n.s.	up	up	Q92499	DDX1	n.s.	down	down
C	DDB_G0281711	n.s.	down	down	Q96GQ7	DDX27	n.d.	n.d.	down
C	DDB_G0282197	n.s.	up	up	O75907	DGAT1	n.d.	n.d.	n.d.
C	DDB_G0276115	n.s.	down	down	Q9H2P9	DPH5	n.s.	down	down
C	DDB_G0282731	n.s.	up	up	Q14181	POLA2	n.s.	down	n.d.
C	DDB_G0280407	n.s.	down	down	Q9NY93	DDX56	n.s.	down	down
C	DDB_G0286849	n.s.	up	up	P37059	HSD17B2	n.d.	n.d.	up
C	DDB_G0275559	n.s.	up	up	P37059	HSD17B2	n.d.	n.d.	up
C	DDB_G0290329	n.s.	down	down	P37059	HSD17B2	n.d.	n.d.	up
C	DDB_G0286849	n.s.	up	up	Q9BPW9	DHRS9	n.d.	n.d.	n.d.
C	DDB_G0275559	n.s.	up	up	Q9BPW9	DHRS9	n.d.	n.d.	n.d.
C	DDB_G0290329	n.s.	down	down	Q9BPW9	DHRS9	n.d.	n.d.	n.d.
C	DDB_G0270482	n.s.	down	down	Q96RP9	GFM1	n.s.	down	n.d.
C	DDB_G0284817	n.s.	down	down	Q99848	EBNA1BP2	n.s.	down	n.d.
C	DDB_G0286849	n.s.	up	up	Q8NEX9	SDR9C7	n.d.	n.d.	n.d.
C	DDB_G0275559	n.s.	up	up	Q8NEX9	SDR9C7	n.d.	n.d.	n.d.
C	DDB_G0290329	n.s.	down	down	Q8NEX9	SDR9C7	n.d.	n.d.	n.d.
C	DDB_G0283877	n.s.	up	up	Q9NX74	DUS2	n.d.	n.d.	n.d.
C	DDB_G0272752	n.s.	up	up	Q9BSJ8	ESYT1	n.d.	n.d.	n.d.
C	DDB_G0286399	n.s.	down	down	P43897	TSFM	up	up	n.d.
C	DDB_G0272752	n.s.	up	up	A0FGR8	ESYT2	n.s.	up	n.d.
C	DDB_G0288385	n.s.	up	up	Q8NCA5	FAM98A	n.s.	down	down
C	DDB_G0288385	n.s.	up	up	Q17RN3	FAM98C	n.d.	n.d.	n.d.
C	DDB_G0272752	n.s.	up	up	A0FGR9	ESYT3	n.d.	n.d.	n.d.
C	DDB_G0288385	n.s.	up	up	Q52LJ0	FAM98B	n.d.	n.d.	n.d.
C	DDB_G0281431	n.s.	up	up	Q6PIY7	PAPD4	n.d.	n.d.	n.d.
C	DDB_G0287147	n.s.	down	down	Q9NVN8	GNL3L	n.d.	n.d.	n.d.
C	DDB_G0287147	n.s.	down	down	Q9BVP2	GNL3	n.s.	down	n.d.
C	DDB_G0286849	n.s.	up	up	O14756	HSD17B6	n.d.	n.d.	n.d.
C	DDB_G0275559	n.s.	up	up	O14756	HSD17B6	n.d.	n.d.	n.d.
C	DDB_G0290329	n.s.	down	down	O14756	HSD17B6	n.d.	n.d.	n.d.
C	DDB_G0292538	n.s.	up	up	O00178	GTPBP1	n.d.	n.d.	up
C	DDB_G0280393	n.s.	down	down	B7ZW38	HNRNPCL3	n.d.	n.d.	n.d.
C	DDB_G0280393	n.s.	down	down	P07910	HNRNPC	n.d.	n.d.	up
C	DDB_G0280393	n.s.	down	down	P0DMR1	HNRNPCL4	n.d.	n.d.	n.d.
C	DDB_G0280393	n.s.	down	down	B2RXH8	HNRNPCL2	n.d.	n.d.	n.d.
C	DDB_G0280393	n.s.	down	down	O60812	HNRNPCL1	n.d.	n.d.	n.d.
C	DDB_G0269860	n.s.	down	down	O15397	IPO8	n.d.	n.d.	n.d.
C	DDB_G0275885	n.s.	down	down	Q9BYG3	NIFK	n.d.	n.d.	n.d.
C	DDB_G0290031	n.s.	down	down	O95478	NSA2	n.d.	n.d.	n.d.
C	DDB_G0288551	n.s.	down	down	Q15397	PUM3	n.d.	n.d.	n.d.
C	DDB_G0284621	n.s.	down	down	Q15269	PWP2	n.s.	down	n.d.
C	DDB_G0290121	n.s.	down	down	P22102	GART	n.s.	down	n.d.
C	DDB_G0276545	n.s.	up	up	Q14914	PTGR1	n.s.	up	down
C	DDB_G0276545	n.s.	up	up	Q8N8N7	PTGR2	n.d.	n.d.	n.d.
C	DDB_G0290623	n.s.	up	up	Q9BQ52	ELAC2	n.s.	down	n.d.
C	DDB_G0278263	n.s.	down	down	Q9P1U0	ZNRD1	n.d.	n.d.	down
C	DDB_G0282339	n.s.	down	down	O15160	POLR1C	n.s.	down	n.d.
C	DDB_G0270130	n.s.	up	up	Q9UBS8	RNF14	n.d.	n.d.	n.d.
C	DDB_G0285763	n.s.	up	up	Q9UBS8	RNF14	n.d.	n.d.	n.d.
C	DDB_G0269860	n.s.	down	down	O95373	IPO7	n.d.	n.d.	down
C	DDB_G0291330	n.s.	up	up	Q7L273	KCTD9	n.d.	n.d.	n.d.
C	DDB_G0293562	n.s.	down	down	Q9NX58	LYAR	n.s.	down	n.d.
C	DDB_G0287233	n.s.	up	up	Q8N4P3	HDDC3	n.s.	down	down
C	DDB_G0292286	n.s.	down	down	Q9H7H0	METTL17	n.s.	down	n.d.
C	DDB_G0295765	n.s.	down	down	Q9NU22	MDN1	n.s.	down	n.d.
C	DDB_G0271272	n.s.	down	down	Q9BQG0	MYBBP1A	n.s.	down	n.d.
C	DDB_G0276411	n.s.	down	down	Q9UKD2	MRTO4	n.s.	down	n.d.
C	DDB_G0269972	n.s.	down	down	Q8NEJ9	NGDN	n.s.	down	n.d.
C	DDB_G0292442	n.s.	up	up	O95544	NADK	n.d.	n.d.	n.d.
C	DDB_G0282243	n.s.	down	down	P55769	SNU13	n.d.	n.d.	n.d.
C	DDB_G0281685	n.s.	down	down	P46087	NOP2	n.s.	down	down
C	DDB_G0284383	n.s.	down	down	Q9Y3T9	NOC2L	n.s.	down	n.d.
C	DDB_G0293622	n.s.	down	down	Q8WTT2	NOC3L	n.s.	down	up
C	DDB_G0287537	n.s.	down	down	P78316	NOP14	n.s.	down	n.d.
C	DDB_G0284195	n.s.	up	up	Q8WX92	NELFB	n.s.	down	n.d.
C	DDB_G0280979	n.s.	up	up	P22061	PCMT1	n.s.	down	n.d.
C	DDB_G0289415	n.s.	down	down	O00541	PES1	n.s.	down	down
C	DDB_G0293212	n.s.	up	up	Q9H611	PIF1	n.d.	n.d.	n.d.
C	DDB_G0275023	n.s.	up	up	Q6S8J3	POTEE	n.d.	n.d.	n.d.
C	DDB_G0272781	n.s.	down	down	Q92871	PMM1	n.d.	n.d.	down
C	DDB_G0272781	n.s.	down	down	O15305	PMM2	n.s.	down	n.d.
C	DDB_G0286849	n.s.	up	up	Q92781	RDH5	n.d.	n.d.	n.d.
C	DDB_G0275559	n.s.	up	up	Q92781	RDH5	n.d.	n.d.	n.d.
C	DDB_G0290329	n.s.	down	down	Q92781	RDH5	n.d.	n.d.	n.d.
C	DDB_G0280393	n.s.	down	down	Q86SE5	RALYL	n.d.	n.d.	n.d.
C	DDB_G0280393	n.s.	down	down	Q9UKM9	RALY	n.d.	n.d.	n.d.
C	DDB_G0280059	n.s.	down	down	Q9H310	RHBG	n.d.	n.d.	n.d.
C	DDB_G0270156	n.s.	down	down	Q9NW13	RBM28	n.s.	down	n.d.
C	DDB_G0286849	n.s.	up	up	O75452	RDH16	n.d.	n.d.	n.d.
C	DDB_G0275559	n.s.	up	up	O75452	RDH16	n.d.	n.d.	n.d.
C	DDB_G0290329	n.s.	down	down	O75452	RDH16	n.d.	n.d.	n.d.
C	DDB_G0287513	n.s.	down	down	Q9H6W3	RIOX1	n.d.	n.d.	n.d.
C	DDB_G0280059	n.s.	down	down	Q02094	RHAG	n.d.	n.d.	n.d.
C	DDB_G0280059	n.s.	down	down	Q9UBD6	RHCG	up	up	up
C	DDB_G0280431	n.s.	up	up	Q9BRS2	RIOK1	n.s.	down	n.d.
C	DDB_G0293560	n.s.	down	down	Q9H9Y6	POLR1B	n.s.	down	n.d.
C	DDB_G0274521	n.s.	down	down	Q15050	RRS1	n.s.	down	down
C	DDB_G0281679	n.s.	up	up	Q9P0P0	RNF181	n.d.	n.d.	down
C	DDB_G0280393	n.s.	down	down	Q8N7X1	RBMXL3	n.d.	n.d.	n.d.
C	DDB_G0286941	n.s.	down	down	Q14690	PDCD11	n.s.	down	n.d.
C	DDB_G0280797	n.s.	down	down	Q5JTH9	RRP12	n.d.	n.d.	n.d.
C	DDB_G0279851	n.s.	down	down	Q96F10	SAT2	n.d.	n.d.	n.d.
C	DDB_G0276159	n.s.	up	up	O00442	RTCA	n.d.	n.d.	n.d.
C	DDB_G0279851	n.s.	down	down	Q86VE3	SATL1	n.d.	n.d.	n.d.
C	DDB_G0291227	n.s.	down	down	Q8TBB6	SLC7A14	n.d.	n.d.	n.d.
C	DDB_G0279851	n.s.	down	down	P21673	SAT1	n.s.	up	up
C	DDB_G0269688	n.s.	down	down	Q9NVU7	SDAD1	n.d.	n.d.	n.d.
C	DDB_G0273105	n.s.	down	down	Q86SK9	SCD5	n.d.	n.d.	n.d.
C	DDB_G0281071	n.s.	down	down	O43175	PHGDH	n.s.	down	n.d.
C	DDB_G0270152	n.s.	down	down	Q6PI48	DARS2	n.s.	down	n.d.
D	DDB_G0286907	up	up	n.s.	P0CG47	UBB	n.d.	n.d.	n.d.
D	DDB_G0292740	up	up	n.s.	O00534	VWA5A	n.s.	up	n.d.
D	DDB_G0270214	up	down	n.s.	O15537	RS1	n.d.	n.d.	n.d.
D	DDB_G0293008	up	up	n.s.	Q8IYJ1	CPNE9	n.s.	down	n.d.
D	DDB_G0293008	up	up	n.s.	Q9HCH3	CPNE5	n.d.	n.d.	n.d.
D	DDB_G0293008	up	up	n.s.	Q86YQ8	CPNE8	n.d.	n.d.	up
D	DDB_G0291081	up	up	n.s.	P28676	GCA	n.s.	up	n.d.
D	DDB_G0291081	up	up	n.s.	O75340	PDCD6	n.d.	n.d.	n.d.
D	DDB_G0291081	up	up	n.s.	Q9UBV8	PEF1	n.d.	n.d.	n.d.
D	DDB_G0291081	up	up	n.s.	P30626	SRI	n.d.	n.d.	down
E	DDB_G0286929	up	up	up	Q86TN4	TRPT1	n.d.	n.d.	n.d.
E	DDB_G0269458	up	up	up	P0CG47	UBB	n.d.	n.d.	n.d.
E	DDB_G0285975	up	up	up	O00534	VWA5A	n.s.	up	n.d.
E	DDB_G0285981	up	up	up	O00534	VWA5A	n.s.	up	n.d.
E	DDB_G0292016	up	up	up	O00534	VWA5A	n.s.	up	n.d.
E	DDB_G0272815	up	down	down	O60911	CTSV	n.s.	up	n.d.
E	DDB_G0272815	up	down	down	P07711	CTSL	n.s.	up	n.d.
E	DDB_G0283113	up	up	up	Q8IV48	ERI1	n.d.	n.d.	n.d.
E	DDB_G0274223	down	up	down	P0CG29	GSTT2	n.s.	down	n.d.
E	DDB_G0274223	down	up	down	P0CG30	GSTT2B	n.s.	down	n.d.
E	DDB_G0274223	down	up	down	P30711	GSTT1	n.d.	n.d.	n.d.
E	DDB_G0267906	up	up	up	Q5T2D3	OTUD3	n.d.	n.d.	n.d.
E	DDB_G0276399	up	up	up	P61026	RAB10	n.d.	n.d.	down
E	DDB_G0268622	up	up	up	P63000	RAC1	n.d.	n.d.	n.d.
E	DDB_G0275133	up	up	up	Q96B70	LENG9	n.d.	n.d.	n.d.
E	DDB_G0274143	up	up	up	Q96B70	LENG9	n.d.	n.d.	n.d.
E	DDB_G0275959	up	up	up	Q8NHP6	MOSPD2	n.d.	n.d.	n.d.
E	DDB_G0285165	up	up	up	Q5T3U5	ABCC10	n.d.	n.d.	n.d.
E	DDB_G0276399	up	up	up	Q92930	RAB8B	n.s.	up	n.d.
E	DDB_G0276399	up	up	up	P51153	RAB13	n.s.	up	n.d.
E	DDB_G0268622	up	up	up	P15153	RAC2	n.s.	up	n.d.
E	DDB_G0292996	up	up	up	P61224	RAP1B	up	up	n.d.
E	DDB_G0276399	up	up	up	P61006	RAB8A	n.s.	down	n.d.
E	DDB_G0268622	up	up	up	P60763	RAC3	n.d.	n.d.	n.d.
E	DDB_G0292996	up	up	up	P62834	RAP1A	n.d.	n.d.	n.d.
E	DDB_G0278481	up	up	up	Q9Y3I0	RTCB	n.d.	n.d.	n.d.
E	DDB_G0278125	up	up	up	Q9UGK8	SERGEF	n.s.	down	down
E	DDB_G0278649	up	up	up	Q93075	TATDN2	n.d.	n.d.	n.d.
F	DDB_G0293102	up	n.s.	up	Q17RP2	TIGD6	n.s.	up	down
F	DDB_G0293102	up	n.s.	up	Q8IY51	TIGD4	n.d.	n.d.	n.d.
F	DDB_G0293102	up	n.s.	up	Q6NT04	TIGD7	n.d.	n.d.	n.d.
F	DDB_G0273433	up	n.s.	up	Q9BUZ4	TRAF4	n.d.	n.d.	n.d.
F	DDB_G0290971	up	n.s.	up	Q9BUZ4	TRAF4	n.d.	n.d.	n.d.
F	DDB_G0273433	up	n.s.	up	Q9Y4K3	TRAF6	n.s.	up	up
F	DDB_G0290971	up	n.s.	up	Q9Y4K3	TRAF6	n.s.	up	up
F	DDB_G0273433	up	n.s.	up	Q12933	TRAF2	n.d.	n.d.	n.d.
F	DDB_G0290971	up	n.s.	up	Q12933	TRAF2	n.d.	n.d.	n.d.
F	DDB_G0287407	up	n.s.	up	Q6P2S7	TTC41P	n.d.	n.d.	n.d.
F	DDB_G0267758	up	n.s.	up	O00534	VWA5A	n.s.	up	n.d.
F	DDB_G0270276	up	n.s.	up	P63126	ERVK-9	n.d.	n.d.	n.d.
F	DDB_G0270276	up	n.s.	up	P63128	ERVK-9	n.d.	n.d.	n.d.
F	DDB_G0270276	up	n.s.	up	Q7LDI9	ERVK-6	n.d.	n.d.	n.d.
F	DDB_G0270276	up	n.s.	up	P62683	ERVK-21	n.d.	n.d.	n.d.
F	DDB_G0270276	up	n.s.	up	P62685	ERVK-8	n.d.	n.d.	n.d.
F	DDB_G0270276	up	n.s.	up	P87889	ERVK-10	n.d.	n.d.	n.d.
F	DDB_G0270276	up	n.s.	up	P63145	ERVK-24	n.d.	n.d.	n.d.
F	DDB_G0270276	up	n.s.	up	P62684	HERVK_113	n.d.	n.d.	n.d.
F	DDB_G0270276	up	n.s.	up	Q9YNA8	ERVK-19	n.d.	n.d.	n.d.
F	DDB_G0270276	up	n.s.	up	P63130	ERVK-7	n.d.	n.d.	n.d.
F	DDB_G0274115	down	n.s.	down	Q9H172	ABCG4	n.d.	n.d.	n.d.
F	DDB_G0274115	down	n.s.	down	Q9H221	ABCG8	n.d.	n.d.	up
F	DDB_G0285003	down	n.s.	down	Q9BRQ8	AIFM2	n.s.	up	n.d.
F	DDB_G0289675	up	n.s.	down	P54922	ADPRH	up	up	n.d.
F	DDB_G0293470	up	n.s.	up	Q96GN5	CDCA7L	n.s.	down	n.d.
F	DDB_G0293470	up	n.s.	up	Q9BWT1	CDCA7	n.s.	down	n.d.
F	DDB_G0293102	up	n.s.	up	P07199	CENPB	n.s.	down	n.d.
F	DDB_G0274487	up	n.s.	up	Q8NCS7	SLC44A5	n.d.	n.d.	n.d.
F	DDB_G0274487	up	n.s.	up	Q8IWA5	SLC44A2	n.s.	up	down
F	DDB_G0274487	up	n.s.	up	Q53GD3	SLC44A4	n.d.	n.d.	n.d.
F	DDB_G0288501	down	n.s.	down	Q86XP3	DDX42	n.d.	n.d.	down
F	DDB_G0291354	down	n.s.	down	Q9Y4D2	DAGLA	n.d.	n.d.	n.d.
F	DDB_G0291354	down	n.s.	down	Q8NCG7	DAGLB	n.s.	down	down
F	DDB_G0271794	up	n.s.	up	Q9C0D9	SELENOI	n.d.	n.d.	n.d.
F	DDB_G0270276	up	n.s.	up	Q9HDB9	ERVK-5	n.d.	n.d.	n.d.
F	DDB_G0278079	up	n.s.	up	Q9NVH0	EXD2	n.d.	n.d.	n.d.
F	DDB_G0274705	down	n.s.	down	P0CG29	GSTT2	n.s.	down	n.d.
F	DDB_G0293122	down	n.s.	down	P0CG29	GSTT2	n.s.	down	n.d.
F	DDB_G0274705	down	n.s.	down	P0CG30	GSTT2B	n.s.	down	n.d.
F	DDB_G0293122	down	n.s.	down	P0CG30	GSTT2B	n.s.	down	n.d.
F	DDB_G0274705	down	n.s.	down	P30711	GSTT1	n.d.	n.d.	n.d.
F	DDB_G0293122	down	n.s.	down	P30711	GSTT1	n.d.	n.d.	n.d.
F	DDB_G0280317	down	n.s.	down	O60760	HPGDS	n.s.	down	n.d.
F	DDB_G0284643	up	n.s.	up	Q9NZL4	HSPBP1	n.s.	down	n.d.
F	DDB_G0269470	down	n.s.	down	Q9NYZ2	SLC25A37	up	up	up
F	DDB_G0269470	down	n.s.	down	Q96A46	SLC25A28	n.d.	n.d.	n.d.
F	DDB_G0289461	up	n.s.	up	Q6L8Q7	PDE12	n.d.	n.d.	n.d.
F	DDB_G0288619	up	n.s.	up	Q96EQ8	RNF125	n.s.	down	n.d.
F	DDB_G0288619	up	n.s.	up	Q9Y508	RNF114	n.d.	n.d.	up
F	DDB_G0293102	up	n.s.	up	Q9Y4A0	JRKL	n.d.	n.d.	down
F	DDB_G0289149	up	n.s.	up	Q99732	LITAF	up	up	up
F	DDB_G0272783	down	n.s.	down	Q5VZR4	MFSD14C	n.d.	n.d.	n.d.
F	DDB_G0272783	down	n.s.	down	Q96MC6	MFSD14A	n.d.	n.d.	n.d.
F	DDB_G0272783	down	n.s.	down	Q5SR56	MFSD14B	n.d.	n.d.	n.d.
F	DDB_G0295697	up	n.s.	down	P47224	RABIF	n.d.	n.d.	down
F	DDB_G0276973	down	n.s.	down	P49279	SLC11A1	n.s.	up	n.d.
F	DDB_G0276973	down	n.s.	down	P49281	SLC11A2	n.s.	up	n.d.
F	DDB_G0290377	up	n.s.	up	Q7Z3Z4	PIWIL4	n.d.	n.d.	n.d.
F	DDB_G0290377	up	n.s.	up	Q96J94	PIWIL1	n.d.	n.d.	n.d.
F	DDB_G0290377	up	n.s.	up	Q7Z3Z3	PIWIL3	n.d.	n.d.	n.d.
F	DDB_G0283415	up	n.s.	up	P08567	PLEK	n.s.	up	n.d.
F	DDB_G0283415	up	n.s.	up	Q9NYT0	PLEK2	down	n.s.	down
F	DDB_G0288619	up	n.s.	up	Q96A37	RNF166	n.s.	down	down
F	DDB_G0270126	up	n.s.	up	P62070	RRAS2	n.s.	up	n.d.
F	DDB_G0284777	up	n.s.	down	Q96BY9	SARAF	n.d.	n.d.	n.d.
F	DDB_G0292250	down	n.s.	down	Q9Y6N5	SQOR	n.d.	n.d.	n.d.
G	DDB_G0270414	up	n.s.	n.s.	Q96MV1	TMEM56	n.d.	n.d.	n.d.
G	DDB_G0281983	up	n.s.	n.s.	O95807	TMEM50A	n.s.	up	n.d.
G	DDB_G0285127	up	n.s.	n.s.	Q6ZT21	TMPPE	n.d.	n.d.	down
G	DDB_G0280513	up	n.s.	n.s.	A6NDI0	TRIM49B	n.d.	n.d.	n.d.
G	DDB_G0280513	up	n.s.	n.s.	A6NI03	TRIM64B	n.d.	n.d.	n.d.
G	DDB_G0280513	up	n.s.	n.s.	P0CI25	TRIM49	n.d.	n.d.	n.d.
G	DDB_G0280513	up	n.s.	n.s.	Q5EBN2	TRIM61	n.d.	n.d.	n.d.
G	DDB_G0280513	up	n.s.	n.s.	Q9C037	TRIM4	n.d.	n.d.	n.d.
G	DDB_G0280513	up	n.s.	n.s.	Q8N7C3	TRIML2	n.d.	n.d.	n.d.
G	DDB_G0280513	up	n.s.	n.s.	P0CI26	TRIM49C	n.d.	n.d.	n.d.
G	DDB_G0280513	up	n.s.	n.s.	Q9BZY9	TRIM31	n.d.	n.d.	n.d.
G	DDB_G0280513	up	n.s.	n.s.	Q9HCM9	TRIM39	n.s.	up	down
G	DDB_G0280513	up	n.s.	n.s.	Q9BSJ1	TRIM51	n.d.	n.d.	n.d.
G	DDB_G0280513	up	n.s.	n.s.	Q8NG06	TRIM58	n.s.	down	n.d.
G	DDB_G0287015	up	n.s.	n.s.	Q9BX74	TM2D1	n.d.	n.d.	down
G	DDB_G0281983	up	n.s.	n.s.	P56557	TMEM50B	n.d.	n.d.	down
G	DDB_G0280513	up	n.s.	n.s.	Q96A61	TRIM52	n.d.	n.d.	down
G	DDB_G0280513	up	n.s.	n.s.	Q495X7	TRIM60	n.d.	n.d.	n.d.
G	DDB_G0280513	up	n.s.	n.s.	Q9BVG3	TRIM62	n.s.	up	n.d.
G	DDB_G0280513	up	n.s.	n.s.	Q8IYM9	TRIM22	n.d.	n.d.	n.d.
G	DDB_G0280513	up	n.s.	n.s.	Q12899	TRIM26	n.d.	n.d.	up
G	DDB_G0280513	up	n.s.	n.s.	P14373	TRIM27	n.d.	n.d.	down
G	DDB_G0280513	up	n.s.	n.s.	Q9BYJ4	TRIM34	n.d.	n.d.	n.d.
G	DDB_G0280513	up	n.s.	n.s.	A6NGJ6	TRIM64	n.d.	n.d.	n.d.
G	DDB_G0280513	up	n.s.	n.s.	I1YAP6	TRIM77	n.d.	n.d.	n.d.
G	DDB_G0280513	up	n.s.	n.s.	Q8N9V2	TRIML1	n.d.	n.d.	n.d.
G	DDB_G0280513	up	n.s.	n.s.	A6NCK2	TRIM43B	n.d.	n.d.	n.d.
G	DDB_G0280513	up	n.s.	n.s.	Q6AZZ1	TRIM68	n.d.	n.d.	down
G	DDB_G0280513	up	n.s.	n.s.	C9J1S8	TRIM49D1	n.d.	n.d.	n.d.
G	DDB_G0280513	up	n.s.	n.s.	A6NLI5	TRIM64C	n.d.	n.d.	n.d.
G	DDB_G0280513	up	n.s.	n.s.	Q9UDY6	TRIM10	n.d.	n.d.	n.d.
G	DDB_G0280513	up	n.s.	n.s.	Q96F44	TRIM11	n.d.	n.d.	n.d.
G	DDB_G0280513	up	n.s.	n.s.	Q9C019	TRIM15	n.d.	n.d.	n.d.
G	DDB_G0280513	up	n.s.	n.s.	O00635	TRIM38	n.s.	up	n.d.
G	DDB_G0280513	up	n.s.	n.s.	A6NK02	TRIM75P	n.d.	n.d.	n.d.
G	DDB_G0280513	up	n.s.	n.s.	Q9C035	TRIM5	n.d.	n.d.	n.d.
G	DDB_G0280513	up	n.s.	n.s.	Q9C030	TRIM6	n.d.	n.d.	n.d.
G	DDB_G0280513	up	n.s.	n.s.	Q96BQ3	TRIM43	n.d.	n.d.	n.d.
G	DDB_G0280513	up	n.s.	n.s.	Q8IWZ4	TRIM48	n.d.	n.d.	n.d.
G	DDB_G0284951	up	n.s.	n.s.	Q15836	VAMP3	n.d.	n.d.	down
G	DDB_G0290765	up	n.s.	n.s.	A2RUC4	TYW5	n.d.	n.d.	n.d.
G	DDB_G0291928	up	n.s.	n.s.	P0CG47	UBB	n.d.	n.d.	n.d.
G	DDB_G0284951	up	n.s.	n.s.	O75379	VAMP4	n.s.	up	n.d.
G	DDB_G0284951	up	n.s.	n.s.	Q9BV40	VAMP8	n.s.	down	down
G	DDB_G0284347	up	n.s.	n.s.	O75351	VPS4B	n.d.	n.d.	down
G	DDB_G0271488	up	n.s.	n.s.	Q9NP79	VTA1	n.d.	n.d.	down
G	DDB_G0284951	up	n.s.	n.s.	P23763	VAMP1	n.s.	up	n.d.
G	DDB_G0284951	up	n.s.	n.s.	P63027	VAMP2	n.s.	up	n.d.
G	DDB_G0269510	up	n.s.	n.s.	Q8NEZ2	VPS37A	n.s.	up	n.d.
G	DDB_G0284347	up	n.s.	n.s.	Q9UN37	VPS4A	n.d.	n.d.	n.d.
G	DDB_G0285375	up	n.s.	n.s.	Q5MNZ9	WIPI1	n.s.	up	n.d.
G	DDB_G0285295	up	n.s.	n.s.	Q9UK41	VPS28	n.d.	n.d.	down
G	DDB_G0267914	up	n.s.	n.s.	Q8N2E2	VWDE	n.d.	n.d.	n.d.
G	DDB_G0285375	up	n.s.	n.s.	Q9Y4P8	WIPI2	n.d.	n.d.	down
G	DDB_G0270212	up	n.s.	n.s.	O15537	RS1	n.d.	n.d.	n.d.
G	DDB_G0282067	up	n.s.	n.s.	Q6XR72	SLC30A10	n.d.	n.d.	n.d.
G	DDB_G0282067	up	n.s.	n.s.	Q9Y6M5	SLC30A1	n.d.	n.d.	n.d.
G	DDB_G0284389	up	n.s.	n.s.	Q9BYD9	ACTRT3	n.d.	n.d.	n.d.
G	DDB_G0289553	down	n.s.	n.s.	P62736	ACTA2	n.d.	n.d.	n.d.
G	DDB_G0289553	down	n.s.	n.s.	Q562R1	ACTBL2	n.d.	n.d.	n.d.
G	DDB_G0289553	down	n.s.	n.s.	P63261	ACTG1	n.d.	n.d.	n.d.
G	DDB_G0289553	down	n.s.	n.s.	P60709	ACTB	n.d.	n.d.	n.d.
G	DDB_G0289553	down	n.s.	n.s.	P68032	ACTC1	n.d.	n.d.	n.d.
G	DDB_G0284389	up	n.s.	n.s.	Q8TC94	ACTL9	n.d.	n.d.	n.d.
G	DDB_G0282293	up	n.s.	n.s.	Q9NQ94	A1CF	n.d.	n.d.	n.d.
G	DDB_G0272014	down	n.s.	n.s.	Q8N5Z0	AADAT	n.d.	n.d.	n.d.
G	DDB_G0291245	up	n.s.	n.s.	Q99758	ABCA3	n.d.	n.d.	n.d.
G	DDB_G0267438	up	n.s.	n.s.	Q99758	ABCA3	n.d.	n.d.	n.d.
G	DDB_G0289553	down	n.s.	n.s.	P63267	ACTG2	n.d.	n.d.	n.d.
G	DDB_G0289553	down	n.s.	n.s.	P68133	ACTA1	n.d.	n.d.	n.d.
G	DDB_G0289553	down	n.s.	n.s.	Q9BYX7	POTEKP	n.d.	n.d.	n.d.
G	DDB_G0284389	up	n.s.	n.s.	Q8TDG2	ACTRT1	n.d.	n.d.	n.d.
G	DDB_G0284389	up	n.s.	n.s.	Q8TDY3	ACTRT2	n.d.	n.d.	n.d.
G	DDB_G0274395	up	n.s.	n.s.	Q8NCT1	ARRDC4	n.s.	up	n.d.
G	DDB_G0291075	down	n.s.	n.s.	Q3KP44	ANKRD55	n.d.	n.d.	n.d.
G	DDB_G0289881	up	n.s.	n.s.	Q9H1Y0	ATG5	n.d.	n.d.	down
G	DDB_G0274395	up	n.s.	n.s.	Q8TBH0	ARRDC2	n.d.	n.d.	n.d.
G	DDB_G0274395	up	n.s.	n.s.	Q96B67	ARRDC3	n.d.	n.d.	n.d.
G	DDB_G0282929	up	n.s.	n.s.	O94817	ATG12	n.d.	n.d.	n.d.
G	DDB_G0282265	up	n.s.	n.s.	Q92484	SMPDL3A	n.s.	up	n.d.
G	DDB_G0282265	up	n.s.	n.s.	Q92485	SMPDL3B	n.d.	n.d.	n.d.
G	DDB_G0280513	up	n.s.	n.s.	Q6UXE8	BTNL3	n.d.	n.d.	n.d.
G	DDB_G0280513	up	n.s.	n.s.	Q6UX41	BTNL8	n.d.	n.d.	n.d.
G	DDB_G0283921	up	n.s.	n.s.	P07858	CTSB	n.d.	n.d.	down
G	DDB_G0280513	up	n.s.	n.s.	O00478	BTN3A3	n.s.	down	n.d.
G	DDB_G0278257	up	n.s.	n.s.	Q5VW32	BROX	n.d.	n.d.	n.d.
G	DDB_G0290427	up	n.s.	n.s.	Q86WA6	BPHL	n.s.	down	n.d.
G	DDB_G0280513	up	n.s.	n.s.	O00481	BTN3A1	n.s.	down	n.d.
G	DDB_G0278163	up	n.s.	n.s.	Q569K6	CCDC157	n.d.	n.d.	n.d.
G	DDB_G0269742	up	n.s.	n.s.	Q92903	CDS1	n.d.	n.d.	n.d.
G	DDB_G0269742	up	n.s.	n.s.	O95674	CDS2	n.s.	up	n.d.
G	DDB_G0267394	up	n.s.	n.s.	Q9HD42	CHMP1A	n.d.	n.d.	n.d.
G	DDB_G0287993	up	n.s.	n.s.	Q9NZZ3	CHMP5	n.s.	up	n.d.
G	DDB_G0275573	up	n.s.	n.s.	Q96CF2	CHMP4C	n.d.	n.d.	n.d.
G	DDB_G0292400	up	n.s.	n.s.	O43633	CHMP2A	n.d.	n.d.	down
G	DDB_G0275573	up	n.s.	n.s.	Q9BY43	CHMP4A	n.s.	down	n.d.
G	DDB_G0270098	up	n.s.	n.s.	Q9H6K1	C6orf106	n.s.	up	down
G	DDB_G0275573	up	n.s.	n.s.	P59074	CHMP4BP1	n.d.	n.d.	n.d.
G	DDB_G0275573	up	n.s.	n.s.	Q9H444	CHMP4B	n.d.	n.d.	up
G	DDB_G0291314	up	n.s.	n.s.	Q9H078	CLPB	n.d.	n.d.	n.d.
G	DDB_G0274237	up	n.s.	n.s.	Q9BYD5	CNFN	n.d.	n.d.	n.d.
G	DDB_G0277849	up	n.s.	n.s.	O00429	DNM1L	n.d.	n.d.	down
G	DDB_G0267414	up	n.s.	n.s.	P18074	ERCC2	n.s.	down	n.d.
G	DDB_G0280513	up	n.s.	n.s.	Q96PL5	ERMAP	n.s.	up	n.d.
G	DDB_G0287415	up	n.s.	n.s.	Q9UKC9	FBXL2	n.d.	n.d.	n.d.
G	DDB_G0287415	up	n.s.	n.s.	Q96IG2	FBXL20	n.s.	up	n.d.
G	DDB_G0290491	up	n.s.	n.s.	Q9H0R8	GABARAPL1	n.s.	up	n.d.
G	DDB_G0286191	up	n.s.	n.s.	Q9H0R8	GABARAPL1	n.s.	up	n.d.
G	DDB_G0290491	up	n.s.	n.s.	Q9BY60	GABARAPL3	n.s.	up	n.d.
G	DDB_G0286191	up	n.s.	n.s.	Q9BY60	GABARAPL3	n.s.	up	n.d.
G	DDB_G0290233	up	n.s.	n.s.	O60861	GAS7	n.s.	down	n.d.
G	DDB_G0290491	up	n.s.	n.s.	P60520	GABARAPL2	n.s.	up	n.d.
G	DDB_G0286191	up	n.s.	n.s.	P60520	GABARAPL2	n.s.	up	n.d.
G	DDB_G0290491	up	n.s.	n.s.	O95166	GABARAP	n.d.	n.d.	n.d.
G	DDB_G0286191	up	n.s.	n.s.	O95166	GABARAP	n.d.	n.d.	n.d.
G	DDB_G0282293	up	n.s.	n.s.	O60506	SYNCRIP	n.d.	n.d.	n.d.
G	DDB_G0282293	up	n.s.	n.s.	O43390	HNRNPR	n.d.	n.d.	n.d.
G	DDB_G0293674	up	n.s.	n.s.	P34931	HSPA1L	n.d.	n.d.	n.d.
G	DDB_G0293674	up	n.s.	n.s.	P0DMV8	HSPA1A	n.d.	n.d.	up
G	DDB_G0293674	up	n.s.	n.s.	P0DMV9	HSPA1B	n.d.	n.d.	up
G	DDB_G0293674	up	n.s.	n.s.	P17066	HSPA6	up	up	up
G	DDB_G0293674	up	n.s.	n.s.	P11142	HSPA8	n.d.	n.d.	n.d.
G	DDB_G0293674	up	n.s.	n.s.	P54652	HSPA2	n.s.	up	up
G	DDB_G0284685	up	n.s.	n.s.	P34949	MPI	n.s.	down	down
G	DDB_G0276347	up	n.s.	n.s.	Q8WV92	MITD1	n.d.	n.d.	n.d.
G	DDB_G0279493	up	n.s.	n.s.	P11717	IGF2R	n.s.	up	n.d.
G	DDB_G0281219	up	n.s.	n.s.	P53370	NUDT6	n.s.	down	n.d.
G	DDB_G0269174	up	n.s.	n.s.	P61026	RAB10	n.d.	n.d.	down
G	DDB_G0282365	up	n.s.	n.s.	P63000	RAC1	n.d.	n.d.	n.d.
G	DDB_G0280513	up	n.s.	n.s.	P19474	TRIM21	n.d.	n.d.	n.d.
G	DDB_G0292642	up	n.s.	n.s.	Q9UBS8	RNF14	n.d.	n.d.	n.d.
G	DDB_G0270006	up	n.s.	n.s.	Q6NYC1	JMJD6	n.s.	up	up
G	DDB_G0292144	up	n.s.	n.s.	Q16322	KCNA10	n.d.	n.d.	n.d.
G	DDB_G0289029	up	n.s.	n.s.	P53990	IST1	n.s.	up	n.d.
G	DDB_G0292144	up	n.s.	n.s.	Q6PI47	KCTD18	n.s.	up	n.d.
G	DDB_G0292144	up	n.s.	n.s.	P22460	KCNA5	n.d.	n.d.	n.d.
G	DDB_G0292144	up	n.s.	n.s.	Q09470	KCNA1	n.d.	n.d.	n.d.
G	DDB_G0292144	up	n.s.	n.s.	P16389	KCNA2	n.d.	n.d.	n.d.
G	DDB_G0292144	up	n.s.	n.s.	P22001	KCNA3	n.s.	up	up
G	DDB_G0292144	up	n.s.	n.s.	Q9UK17	KCND3	n.d.	n.d.	n.d.
G	DDB_G0292144	up	n.s.	n.s.	P22459	KCNA4	n.d.	n.d.	n.d.
G	DDB_G0267476	up	n.s.	n.s.	A4D0S4	LAMB4	n.d.	n.d.	n.d.
G	DDB_G0267476	up	n.s.	n.s.	P07942	LAMB1	n.s.	up	up
G	DDB_G0292144	up	n.s.	n.s.	Q9BQ13	KCTD14	n.s.	down	up
G	DDB_G0292144	up	n.s.	n.s.	P17658	KCNA6	n.d.	n.d.	n.d.
G	DDB_G0292144	up	n.s.	n.s.	Q96RP8	KCNA7	n.d.	n.d.	n.d.
G	DDB_G0292144	up	n.s.	n.s.	Q9NSA2	KCND1	n.s.	up	n.d.
G	DDB_G0292144	up	n.s.	n.s.	Q9NZV8	KCND2	n.d.	n.d.	n.d.
G	DDB_G0267476	up	n.s.	n.s.	P55268	LAMB2	n.d.	n.d.	n.d.
G	DDB_G0280219	up	n.s.	n.s.	O95214	LEPROTL1	n.s.	down	n.d.
G	DDB_G0270586	up	n.s.	n.s.	Q5VZR4	MFSD14C	n.d.	n.d.	n.d.
G	DDB_G0277167	up	n.s.	n.s.	Q5VZR4	MFSD14C	n.d.	n.d.	n.d.
G	DDB_G0270586	up	n.s.	n.s.	Q96MC6	MFSD14A	n.d.	n.d.	n.d.
G	DDB_G0277167	up	n.s.	n.s.	Q96MC6	MFSD14A	n.d.	n.d.	n.d.
G	DDB_G0270586	up	n.s.	n.s.	Q5SR56	MFSD14B	n.d.	n.d.	n.d.
G	DDB_G0277167	up	n.s.	n.s.	Q5SR56	MFSD14B	n.d.	n.d.	n.d.
G	DDB_G0292378	down	n.s.	n.s.	Q9NPG2	NGB	n.d.	n.d.	n.d.
G	DDB_G0280219	up	n.s.	n.s.	O15243	LEPROT	n.s.	up	n.d.
G	DDB_G0292736	up	n.s.	n.s.	P51178	PLCD1	n.d.	n.d.	down
G	DDB_G0292736	up	n.s.	n.s.	Q9BRC7	PLCD4	n.d.	n.d.	n.d.
G	DDB_G0274237	up	n.s.	n.s.	Q9NZF1	PLAC8	n.d.	n.d.	n.d.
G	DDB_G0275451	up	n.s.	n.s.	Q8WUM4	PDCD6IP	n.s.	up	down
G	DDB_G0271516	up	n.s.	n.s.	Q5VZY2	PLPP4	n.d.	n.d.	n.d.
G	DDB_G0289553	down	n.s.	n.s.	Q6S8J3	POTEE	n.d.	n.d.	n.d.
G	DDB_G0271516	up	n.s.	n.s.	Q8NEB5	PLPP5	n.d.	n.d.	n.d.
G	DDB_G0292736	up	n.s.	n.s.	Q8N3E9	PLCD3	n.s.	up	n.d.
G	DDB_G0269174	up	n.s.	n.s.	Q92930	RAB8B	n.s.	up	n.d.
G	DDB_G0269174	up	n.s.	n.s.	P51153	RAB13	n.s.	up	n.d.
G	DDB_G0282365	up	n.s.	n.s.	P15153	RAC2	n.s.	up	n.d.
G	DDB_G0269174	up	n.s.	n.s.	P61006	RAB8A	n.s.	down	n.d.
G	DDB_G0280513	up	n.s.	n.s.	F8VTS6	RFPL4AL1	n.d.	n.d.	n.d.
G	DDB_G0284571	up	n.s.	n.s.	Q7Z5H3	ARHGAP22	n.s.	down	n.d.
G	DDB_G0282365	up	n.s.	n.s.	P60763	RAC3	n.d.	n.d.	n.d.
G	DDB_G0280513	up	n.s.	n.s.	Q6ZWI9	RFPL4B	n.d.	n.d.	n.d.
G	DDB_G0284571	up	n.s.	n.s.	Q8N264	ARHGAP24	up	up	n.d.
G	DDB_G0284571	up	n.s.	n.s.	P42331	ARHGAP25	n.d.	n.d.	n.d.
G	DDB_G0280513	up	n.s.	n.s.	A6NLU0	RFPL4A	n.d.	n.d.	n.d.
G	DDB_G0280513	up	n.s.	n.s.	O75678	RFPL2	n.d.	n.d.	n.d.
G	DDB_G0280513	up	n.s.	n.s.	O75677	RFPL1	n.d.	n.d.	n.d.
G	DDB_G0280513	up	n.s.	n.s.	O75679	RFPL3	n.d.	n.d.	n.d.
G	DDB_G0270140	up	n.s.	n.s.	P62070	RRAS2	n.s.	up	n.d.
G	DDB_G0292814	down	n.s.	n.s.	Q8N4F4	SLC22A24	n.d.	n.d.	n.d.
G	DDB_G0292814	down	n.s.	n.s.	Q8TCC7	SLC22A8	n.d.	n.d.	n.d.
G	DDB_G0292814	down	n.s.	n.s.	Q4U2R8	SLC22A6	n.d.	n.d.	up
G	DDB_G0292814	down	n.s.	n.s.	Q9Y694	SLC22A7	n.d.	n.d.	n.d.
G	DDB_G0292814	down	n.s.	n.s.	Q9Y267	SLC22A14	n.d.	n.d.	n.d.
G	DDB_G0292814	down	n.s.	n.s.	Q6T423	SLC22A25	n.d.	n.d.	n.d.
G	DDB_G0292814	down	n.s.	n.s.	Q63ZE4	SLC22A10	n.d.	n.d.	n.d.
G	DDB_G0292814	down	n.s.	n.s.	Q9NSA0	SLC22A11	n.d.	n.d.	n.d.
G	DDB_G0292814	down	n.s.	n.s.	Q8IVM8	SLC22A9	n.d.	n.d.	n.d.
G	DDB_G0292814	down	n.s.	n.s.	Q96S37	SLC22A12	n.d.	n.d.	n.d.
G	DDB_G0292814	down	n.s.	n.s.	A6NK97	SLC22A20	n.d.	n.d.	n.d.
G	DDB_G0290761	up	n.s.	n.s.	Q9NXL6	SIDT1	up	n.s.	n.d.
G	DDB_G0290761	up	n.s.	n.s.	Q8NBJ9	SIDT2	n.d.	n.d.	n.d.
G	DDB_G0269670	up	n.s.	n.s.	Q9H4B6	SAV1	n.s.	up	up
G	DDB_G0284037	up	n.s.	n.s.	Q96FJ0	STAMBPL1	n.s.	down	n.d.
G	DDB_G0284037	up	n.s.	n.s.	O95630	STAMBP	n.d.	n.d.	n.d.

## Sheet: KEGG 
	Term	Overlap	P-value	Adjusted P-value	Odds Ratio	Combined Score	Genes
M. tuberculosis	SNARE interactions in vesicular transport	4/34	1.05542e-05	0.00108356	29.0487	332.868	VAMP8;VAMP1;VAMP4;VAMP2
	Autophagy	7/128	8.75065e-07	0.00013476	13.5031	188.354	VAMP8;GABARAPL2;GABARAPL1;CTSL;TRAF6;RRAS2;WIPI1
	Endocytosis	10/244	5.34322e-08	1.64571e-05	10.1194	169.448	PDCD6IP;IST1;TRAF6;HSPA6;CHMP4A;VPS37A;HSPA2;IGF2R;RAB8A;CHMP5
	Lysosome	6/123	1.06574e-05	0.000820619	12.0446	137.901	CTSL;SLC11A1;SLC11A2;CTSV;LITAF;IGF2R
	Glutathione metabolism	3/56	0.00151986	0.0668739	13.2275	85.8351	HPGDS;GSTT2;GSTT2B
	Mitophagy	3/65	0.00233318	0.0898274	11.396	69.0658	GABARAPL2;GABARAPL1;RRAS2
	Toxoplasmosis	4/113	0.00115017	0.0708503	8.7403	59.153	TRAF6;HSPA6;LAMB1;HSPA2
	Metabolism of xenobiotics by cytochrome P450	3/74	0.00337344	0.103902	10.01	56.9752	HPGDS;GSTT2;GSTT2B
	Antigen processing and presentation	3/77	0.0037738	0.105666	9.62001	53.6765	CTSL;HSPA6;HSPA2
	Chemical carcinogenesis	3/82	0.00450317	0.115581	9.03342	48.8073	HPGDS;GSTT2;GSTT2B
L. pneumophila	Pyruvate metabolism	6/39	1.2065e-06	0.000185801	17.1895	234.255	ALDH3A2;PDHA1;ALDH2;PDHB;DLD;ACACA
	Citrate cycle (TCA cycle)	5/30	6.45364e-06	0.000662574	18.622	222.549	CS;ACLY;PDHA1;PDHB;DLD
	Glycolysis / Gluconeogenesis	8/68	1.64604e-07	5.0698e-05	13.1449	205.32	ALDH3A2;PDHA1;ALDH2;ALDH3B1;AKR1A1;PDHB;FBP1;DLD
	Pantothenate and CoA biosynthesis	3/19	0.000614687	0.0378647	17.6419	130.451	PANK4;PANK2;PPCS
	Aminoacyl-tRNA biosynthesis	6/66	2.75124e-05	0.00211846	10.1574	106.662	RARS2;QARS;LARS;TARS;IARS2;EPRS
	Histidine metabolism	3/23	0.00109428	0.0481482	14.5737	99.3587	ALDH3A2;ALDH2;ALDH3B1
	Biosynthesis of unsaturated fatty acids	3/27	0.00176049	0.0677788	12.4146	78.7357	ELOVL1;SCD;ELOVL7
	Glyoxylate and dicarboxylate metabolism	3/30	0.00239604	0.0614984	11.1732	67.4183	CS;SHMT2;DLD
	Valine, leucine and isoleucine degradation	4/48	0.000887866	0.0455771	9.31099	65.4254	ALDH3A2;ALDH2;IVD;DLD
	RNA polymerase	3/31	0.00263545	0.0579798	10.8128	64.2138	ZNRD1;POLR3H;POLR2H
